# Supplementary material for: A mechanosensing mechanism controls plasma membrane shape homeostasis at the nanoscale
Source: eLife journal article supplement (doi:10.7554/elife.72316), 2023-09-25

10 seconds exposure

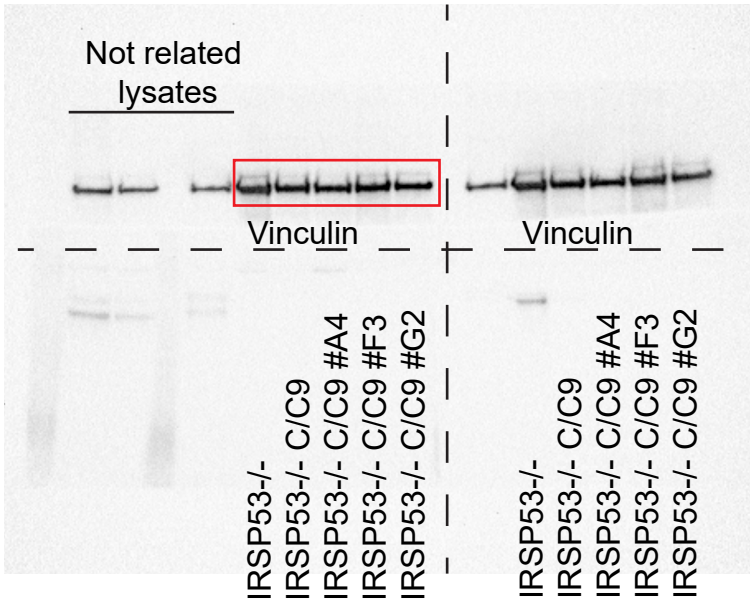

Marker overlay

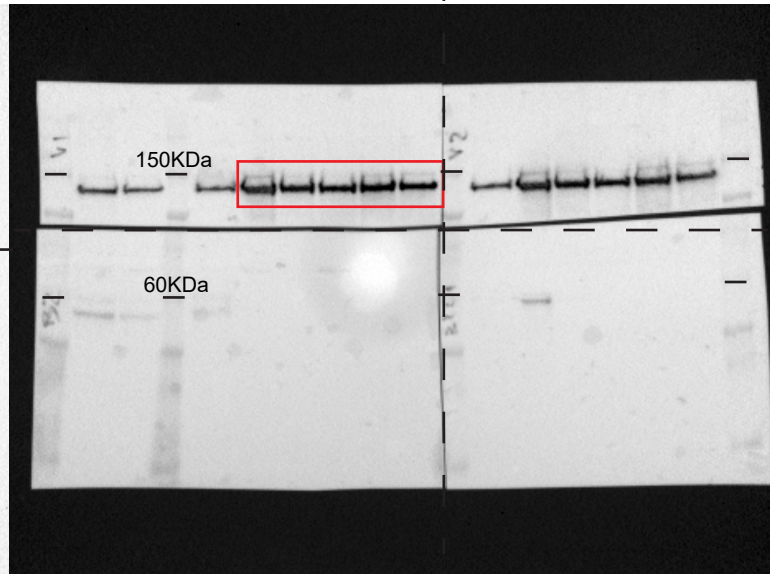

160 seconds exposure

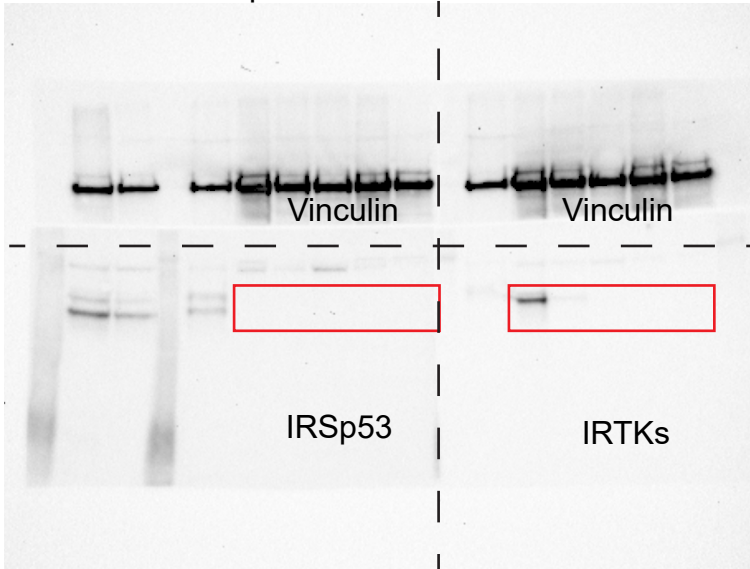

Marker overlay

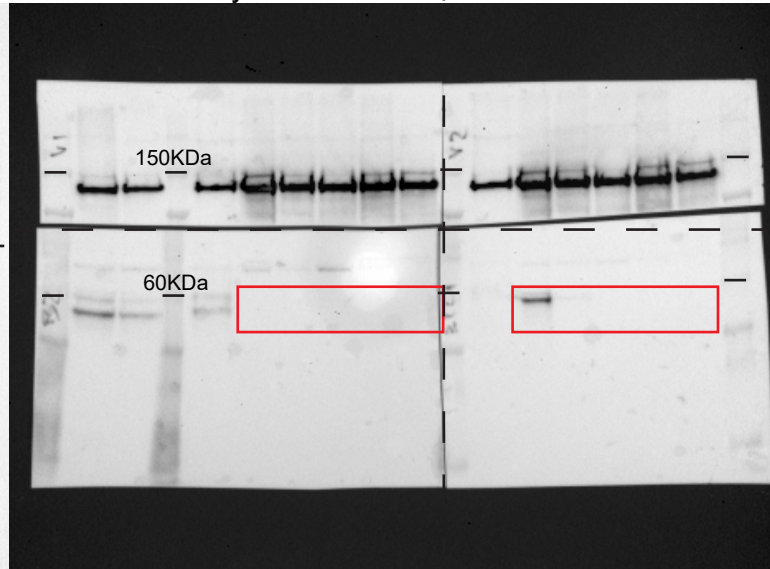

160 seconds exposure

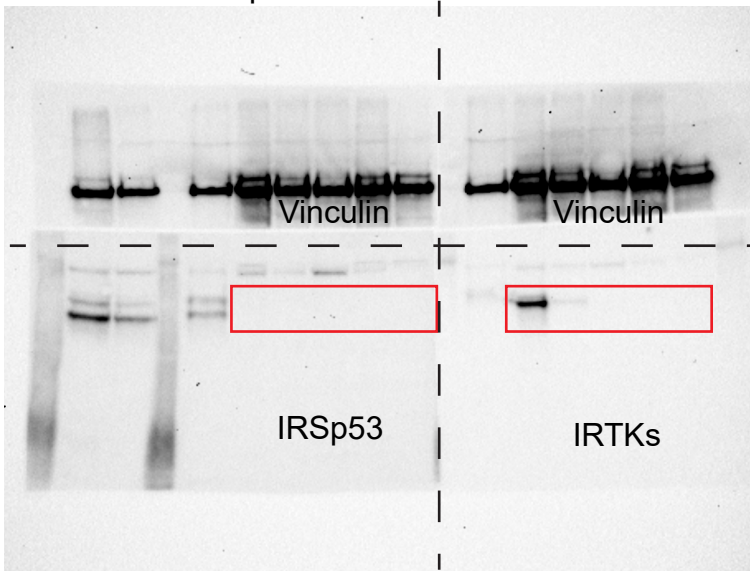

Marker overlay

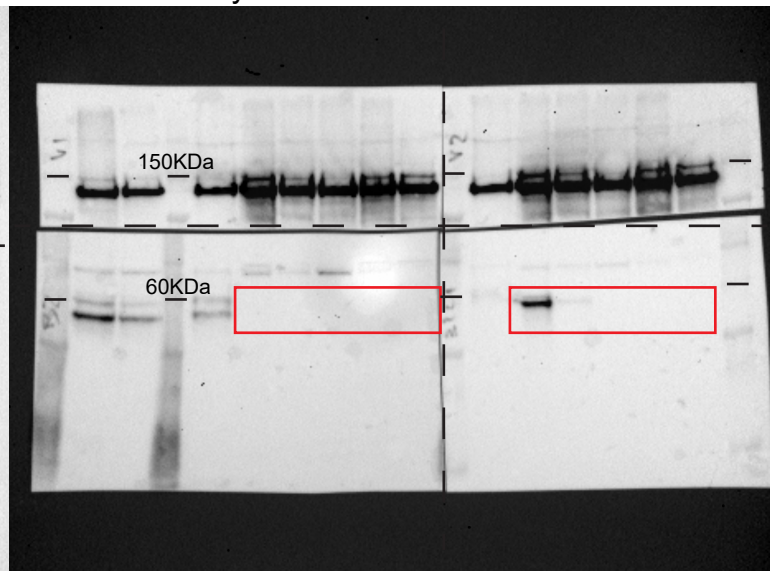

Supplement: fig2-figsupp1-data7 [file elife-72316-fig2-figsupp1-data7-v2.pdf]
