# Supplementary material for: A mechanosensing mechanism controls plasma membrane shape homeostasis at the nanoscale
Source: eLife. 2023 Sep 25;12:e72316. doi: 10.7554/eLife.72316 (PMC10569792; doi:10.7554/eLife.72316)
Supplement: Figure 1—source data 1. [file elife-72316-fig1-data1.xlsx]

## Sheet: Figure1F
Figure 1F
	Neck/head diameter
	Neck	Head
	78	112
	41	88
	160	141
	99	143
	130	150
	76	110
	65	108
	68	116
	74	71
	125	114
	58	99
	138	196
	71	82
	165	221
	25	45
	51	107
	92	165
	38	47
	53	100
	56	85

## Sheet: Figure1G
Figure 1G
	Neck/head curvature
	Neck curvature	Head curvature
	0.025641	0.0178571
	0.0487805	0.0227273
	0.0125	0.0141844
	0.020202	0.013986
	0.0153846	0.0133333
	0.0263158	0.0181818
	0.0307692	0.0185185
	0.0294118	0.0172414
	0.027027	0.028169
	0.016	0.0175439
	0.0344828	0.020202
	0.0144928	0.0102041
	0.028169	0.0243902
	0.0121212	0.00904977
	0.08	0.0444444
	0.0392157	0.0186916
	0.0217391	0.0121212
	0.0526316	0.0425532
	0.0377359	0.02
	0.0357143	0.0235294
