# Supplementary material for: A mechanosensing mechanism controls plasma membrane shape homeostasis at the nanoscale
Source: eLife. 2023 Sep 25;12:e72316. doi: 10.7554/eLife.72316 (PMC10569792; doi:10.7554/eLife.72316)
Supplement: Figure 2—figure supplement 1—source data 1. [file elife-72316-fig2-figsupp1-data1.xlsx]

## Sheet: FigureS1A
Figure S1A
	% Cell area per reservoir
	NHDF
	3.93758
	6.45723
	1.08988
	1.16309
	2.08899
	1.30385
	1.29644
	1.67066
	1.75422
	1.06482
	1.41134

## Sheet: FigureS1B
Figure S1B
	Decay constant (s-1)
	NHDF	NHDF ACB	NHDF Ezrin
	0.0233748	6.37047e-06	0.325034
	0.0192731	1.28941e-05	0.0183251
	0.0848113	0.00421574	0.0378881
	0.020564	0.00698538	0.0822614
	0.0320069	0.0362019	0.0350713
	0.0274969	0.0337403	0.0152552
	0.0270605	0.0183591	0.0134362
	0.0200237	2.4159e-05	0.0622836
	0.0185865	8.35964e-06	0.0836551
	0.0742726	0.0261574	0.0131014
	0.0355757	0.020034	0.0821205
	0.0377637	0.0107178	0.0363585
	0.0126824	0.0202021	0.0415294
	0.0567182	0.0354165	0.0131014
	0.0331747	0.0347897
	0.0263536	0.0127923
	0.124748	0.0201321
		0.0475249
		0.0343049
		1.19436e-05

## Sheet: FigureS1D
Figure S1D
	Fluorescence versus time
	Time (s)	WT MEF																				IRSp53-/- MEF
	0	0.563535	0.595313	0.471419	1.03188	1.07015	1.38932	0.552144	0.855118	0.936914	1.51528	0.569686	0.898358	0.983462	1.47239	1.39132	1.07591	1.3079	0.817512	1.39597	1.1069	0.42138	0.983386	1.87659	0.887442	1.27169	0.83388	1.506	1.42266	1.2425	1.64496	1.41767	1.25716	1.89044	2.85306	1.35952	1.1133	1.84529
	3	0.533977	0.554964	0.311991	0.877882	0.939194	1.20641	0.540662	0.756927	0.674767	1.44199	0.417026	0.750901	0.892655	1.34683	1.21993	0.890278	1.18946	0.552184	0.883711	0.812005	0.251833	0.625213	1.28677	0.872802	1.08519	0.571454	1.45691	1.0989	0.965022	1.66395	1.14738	0.637944	1.4968	2.4371	0.505817	1.02779	1.24178
	6	0.229257	0.503505	0.259335	0.772662	0.839962	0.998936	0.522301	0.672776	0.491996	1.41801	0.531555	0.583943	0.869138	1.3131	1.00951	0.767768	1.03143	0.424365	0.838763	0.68563	0.368927	0.458899	1.32337	0.876552	0.981484	0.336401	1.42237	0.904203	0.844117	1.64548	0.884729	0.732334	1.2538	2.07416	0.471395	0.881383	1.14835
	9	0.409326	0.469724	0.220478	0.765836	0.871796	0.96136	0.45615	0.608186	0.482992	1.22418	0.563884	0.653779	0.807092	1.26636	0.84819	0.619015	0.901303	0.344881	0.917172	0.700593	0.436654	0.352651	1.08991	0.880057	0.894975	0.764878	1.34558	0.769462	0.629686	1.63263	0.8061	0.942582	1.34149	1.77882	0.839841	1.01635	0.723956
	12	0.450596	0.425638	0.165313	0.690321	0.806328	0.919219	0.450506	0.551781	0.487615	0.900998	0.573855	0.688553	0.766065	1.17511	0.842753	0.569625	0.849919	0.232529	0.847049	0.689639	0.434481	0.190638	0.886933	0.84753	0.82707	0.653953	1.37127	0.63472	0.828673	1.48847	0.808734	0.950612	1.23042	1.69294	0.801018	1.05483	1.18411
	15	0.451813	0.403401	0.160607	0.647994	0.789228	0.871452	0.476717	0.532684	0.292895	1.05436	0.57072	0.689819	0.772192	1.22086	0.738792	0.434307	0.688649	0.259738	0.747373	0.64751	0.415503	0.260258	0.811566	0.809252	0.744624	0.604833	1.35748	0.605629	0.920005	1.37155	0.806492	0.915715	1.13832	1.72375	0.759034	1.12425	1.07248
	18	0.433011	0.379654	0.120985	0.540366	0.6945	0.788963	0.446437	0.50435	0.67704	0.561585	0.565702	0.673551	0.766295	1.21236	0.66466	0.657138	0.99839	0.256902	0.642746	0.485973	0.414408	0.171202	0.870878	0.789261	0.686028	0.680573	1.33369	0.562592	0.921763	1.54035	0.727428	0.90011	1.07231	1.86213	0.805382	1.13408	1.06512
	21	0.378657	0.346701	0.101883	0.496748	0.627112	0.774639	0.444535	0.485057	0.678284	1.28808	0.586697	0.648368	0.715308	1.18196	0.665852	0.633866	0.991272	0.242814	0.565976	0.563176	0.38913	0.161526	0.872177	0.793334	0.616642	0.642062	1.33427	0.493655	0.923511	1.59454	0.643121	0.833158	0.99355	1.74574	0.637794	1.17228	0.980793
	24	0.393274	0.314536	0.111258	0.442491	0.598204	0.688415	0.461296	0.470864	0.735737	1.27565	0.548097	0.615292	0.775909	1.24483	0.57617	0.659372	1.09488	0.206471	0.486796	0.548122	0.387938	0.0738345	0.725336	0.76746	0.594331	0.610543	1.3001	0.451676	0.887242	1.49741	0.600155	0.691225	0.997977	1.80684	0.56355	1.27595	1.00808
	27	0.348442	0.28852	0.0760966	0.412175	0.60412	0.616741	0.456034	0.449975	0.761106	1.21295	0.620466	0.59348	0.533239	0.960757	0.580101	0.588035	1.04265	0.185458	0.389974	0.510398	0.343605	0.119132	0.708782	0.734604	0.512429	0.57332	1.24139	0.391977	0.807276	1.36958	0.521047	0.599931	0.937715	1.70544	0.486808	1.18026	0.813712
	30	0.33878	0.278332	0.0605528	0.351892	0.569749	0.525217	0.49972	0.459166	0.707488	0.948454	0.610768	0.615238	0.469738	0.886299	0.502197	0.553938	1.0199	0.199922	0.481467	0.436074	0.355168	0.0337724	0.621547	0.73577	0.500619	0.504162	1.18642	0.355361	0.775573	1.35228	0.482761	0.524511	0.835042	1.68396	0.410076	1.13456	0.853591
	33	0.312401	0.252991	0.065897	0.335617	0.542049	0.450559	0.51863	0.425482	0.716231	0.702637	0.581514	0.586939	0.458528	0.886072	0.448577	0.545355	0.995445	0.202126	0.48438	0.409655	0.344241	0.0248336	0.559802	0.726512	0.462975	0.47836	1.11782	0.328946	0.774626	1.30789	0.424934	0.439764	0.781729	1.68011	0.370668	1.07845	0.785107
	36	0.281569	0.191224	0.0455724	0.278577	0.474788	0.444693	0.448096	0.447173	0.692473	0.642847	0.564683	0.576976	0.456069	0.826953	0.433714	0.412339	0.796655	0.175478	0.332562	0.394262	0.335783	0.0194986	0.539596	0.658762	0.424642	0.435641	1.03654	0.34597	0.671161	1.23867	0.401064	0.36469	0.695448	1.55807	0.31594	1.02896	0.764004
	39	0.275823	0.196582	0.0265514	0.212849	0.376474	0.406326	0.411347	0.419033	0.641413	0.672584	0.559087	0.557663	0.406577	0.775715	0.41395	0.43781	0.799916	0.143109	0.339235	0.346551	0.328867	0.0383279	0.475924	0.615577	0.36027	0.397332	1.01098	0.310835	0.581002	1.30563	0.338646	0.312185	0.652265	1.41789	0.226769	1.05191	0.738461
	42	0.254655	0.154745	0.012713	0.203513	0.359012	0.371784	0.454747	0.397018	0.624779	0.655216	0.608156	0.671665	0.402307	0.701861	0.363005	0.407606	0.791601	0.116579	0.32699	0.331076	0.297879	0.0170987	0.33019	0.600683	0.367739	0.337142	1.00086	0.267228	0.547408	1.13275	0.273939	0.272782	0.570035	1.35378	0.235479	0.951374	0.742604
	45	0.241818	0.145849	-0.00571685	0.154324	0.383315	0.34428	0.450907	0.346736	0.613601	0.602463	0.576566	0.688057	0.398266	0.664785	0.365735	0.375401	0.729035	0.111158	0.325556	0.248283	0.281021	-0.0181543	0.291846	0.611522	0.336692	0.308877	0.961066	0.239074	0.512961	1.02144	0.257528	0.204074	0.585311	1.19128	0.249013	0.834188	0.677812
	48	0.253195	0.148561	-0.000497397	0.22744	0.32584	0.284306	0.346329	0.314333	0.623951	0.574169	0.567005	0.666526	0.346865	0.583242	0.353735	0.345254	0.649026	0.0853308	0.243769	0.361023	0.273984	-0.0717674	0.250561	0.597276	0.318712	0.287201	0.888584	0.211351	0.498162	0.9884	0.225534	0.164829	0.501657	1.19039	0.184838	0.699122	0.673741
	51	0.232982	0.114373	0.00356639	0.1785	0.34242	0.268434	0.320059	0.326673	0.607051	0.498049	0.520257	0.564009	0.350849	0.629259	0.315469	0.351285	0.669698	0.0946597	0.236006	0.285312	0.276282	-0.0428168	0.282752	0.570329	0.287314	0.235811	0.840846	0.220869	0.415899	0.97184	0.205229	0.143898	0.469997	1.24542	0.193361	0.733334	0.669083
	54	0.213706	0.129749	0.0154375	0.207039	0.356553	0.235905	0.316911	0.297076	0.563101	0.376477	0.505261	0.455645	0.33471	0.602216	0.283472	0.292563	0.583165	0.078642	0.206886	0.279996	0.252506	-0.0808594	0.161424	0.54505	0.273522	0.224677	0.818036	0.193918	0.390263	0.983083	0.190521	0.123681	0.436654	0.994991	0.191171	0.672038	0.705205
	57	0.202648	0.11029	-0.00686375	0.162123	0.34462	0.215552	0.274796	0.2834	0.541318	0.40876	0.495193	0.431071	0.345109	0.593245	0.257317	0.253782	0.554727	0.0505382	0.162249	0.226515	0.228351	-0.0474261	0.220285	0.555483	0.25749	0.185189	0.77175	0.191512	0.340986	0.976035	0.164629	0.110338	0.362292	1.03556	0.141343	0.736232	0.642598
	60	0.195924	0.112597	0.00249831	0.125159	0.347837	0.211424	0.306017	0.266896	0.472399	0.324245	0.471034	0.412645	0.29561	0.566429	0.247086	0.269907	0.592115	0.0777951	0.159963	0.197356	0.220763	-0.126675	0.148256	0.534986	0.239768	0.184621	0.732904	0.170363	0.336737	0.923078	0.131243	0.0736072	0.374035	0.969314	0.142752	0.679454	0.664391
	63	0.163568	0.122923	0.00419326	0.0891358	0.300143	0.169818	0.295984	0.239682	0.508904	0.269296	0.457141	0.395369	0.294066	0.56275	0.258915	0.250247	0.565528	0.0843231	0.164003	0.17156	0.2074	-0.14423	0.184047	0.512966	0.222544	0.157752	0.699995	0.172189	0.328772	0.880193	0.150261	0.051648	0.348002	0.918396	0.117574	0.651855	0.579703
	66	0.12389	0.113594	0.0140724	0.084812	0.311039	0.163129	0.331189	0.242873	0.44155	0.302719	0.417639	0.371342	0.238306	0.567752	0.247879	0.193994	0.468662	0.0621233	0.17223	0.154051	0.198911	-0.107401	0.118315	0.489664	0.206385	0.158532	0.66925	0.131071	0.322875	0.49765	0.114635	0.0195716	0.26926	0.907045	0.100914	0.525368	0.526536
	69	0.163594	0.111641	-0.0176846	0.119481	0.289097	0.121108	0.301842	0.218206	0.388942	0.288176	0.402083	0.368924	0.20408	0.52262	0.257537	0.193996	0.462264	0.0322787	0.144425	0.125334	0.176814	-0.0710284	0.160068	0.520275	0.178174	0.129205	0.602577	0.117728	0.280062	0.766659	0.105744	-0.00503171	0.250299	0.84305	0.0777081	0.495772	0.494965
	72	0.113802	0.115462	0.00985407	0.0747801	0.280357	0.0973114	0.297859	0.214006	0.346329	0.264401	0.377537	0.333253	0.175653	0.498586	0.213094	0.1789	0.435695	0.0718457	0.131066	0.150846	0.162461	-0.102225	0.133944	0.488303	0.163578	0.0923897	0.58871	0.0951125	0.270491	0.731882	0.074965	-2.48757e-05	0.169479	0.767975	0.0666981	0.396726	0.48354
	75	0.080726	0.0862234	0.028037	0.087038	0.26469	0.111854	0.300093	0.211544	0.338491	0.264929	0.361426	0.332503	0.174666	0.454333	0.221423	0.158317	0.425616	0.0695815	0.143687	0.122718	0.164511	-0.133072	0.137954	0.477374	0.151333	0.094666	0.518908	0.116099	0.269793	0.680028	0.074059	-0.0688229	0.167944	0.675789	0.0657783	0.263097	0.409772
	78	0.0912925	0.0691577	-0.00986275	0.0948204	0.249895	0.0996957	0.280288	0.209826	0.332239	0.247567	0.351597	0.333843	0.144752	0.437679	0.190721	0.13587	0.361222	0.0506866	0.127509	0.0750703	0.1334	-0.0852454	0.150304	0.447402	0.128821	0.0642998	0.532384	0.140476	0.219005	0.689121	0.0806307	-0.0583605	0.182726	0.688188	0.0963274	0.268166	0.385662
	81	0.0406307	0.0663123	-0.00998004	0.0512594	0.238138	0.0943844	0.278939	0.163998	0.307265	0.124557	0.327499	0.350677	0.167652	0.397161	0.192314	0.145536	0.376178	0.0387891	0.144816	0.0696652	0.129748	-0.0898961	0.116036	0.410681	0.116483	0.0792992	0.530846	0.127069	0.243852	0.659303	0.0868579	-0.0613102	0.136471	0.658333	0.0812404	0.308267	0.35647
	84	0.0528488	0.0770389	0.00543	0.0651253	0.227271	0.107939	0.278401	0.177104	0.294658	0.116968	0.316009	0.312225	0.158283	0.389381	0.151893	0.129507	0.340193	0.0543365	0.108868	0.0558812	0.121847	-0.0480152	0.151313	0.377397	0.106914	0.0589257	0.521029	0.0860178	0.229711	0.627591	0.0658043	-0.0609549	0.110584	0.648777	0.0583943	0.252106	0.233695
	87	0.0286588	0.087761	-0.0124854	0.0340754	0.242511	0.100466	0.262855	0.151123	0.280955	0.101574	0.277826	0.287777	0.130558	0.369568	0.179372	0.114809	0.316029	0.0711243	0.108341	0.0470604	0.123814	-0.0926794	0.129608	0.349545	0.108157	0.0565445	0.500929	0.0918581	0.245678	0.584331	0.056829	-0.049732	0.143363	0.583287	0.0467544	0.251498	0.268256
	90	0.0654958	0.0475826	-0.0157219	0.0209669	0.197245	0.101066	0.239303	0.161233	0.234175	0.0665525	0.277921	0.275822	0.110673	0.312381	0.136788	0.0965659	0.28949	0.0741922	0.0762498	0.0338019	0.092817	-0.0901514	0.0365642	0.339033	0.0919049	0.0461931	0.462914	0.0901668	0.224456	0.559808	0.0598224	-0.0550214	0.168479	0.446892	0.0787587	0.241308	0.276307
	93	-0.00469806	0.070256	-0.0201561	0.0110137	0.230213	0.0840923	0.265129	0.153618	0.248665	0.0387746	0.233016	0.27705	0.107225	0.309938	0.157086	0.0772056	0.21588	0.0779387	0.0719217	0.0423743	0.0908378	-0.0609184	0.0500469	0.332432	0.0679114	0.0272638	0.418338	0.101219	0.248797	0.513859	0.0590648	-0.0589962	0.149639	0.368243	0.0331382	0.185613	0.263059
	96	0.0109464	0.0657562	-0.0698699	-0.0110179	0.199391	0.0779988	0.238478	0.139416	0.212337	0.122333	0.190747	0.246686	0.113973	0.306642	0.134974	0.0998028	0.196201	0.057362	0.0653644	0.0588052	0.0871816	-0.0947133	0.0820746	0.326723	0.0841815	0.0194417	0.420116	0.0675574	0.196656	0.479461	0.035101	-0.0569977	0.157944	0.353291	0.0371307	0.167736	0.271781
	99	0.012258	0.0612061	-0.035804	0.0408582	0.195019	0.0824348	0.215011	0.0987248	0.160802	0.119428	0.186088	0.228948	0.112115	0.315021	0.154036	0.0666066	0.141495	0.0476194	0.0679333	0.0286617	0.0894122	-0.0808008	0.081334	0.316774	0.0895496	0.00628165	0.407653	0.0877779	0.19753	0.468724	0.0240972	-0.0486332	0.156244	0.358224	0.0701572	0.159148	0.275539
	102	0.00880325	0.069814	-0.0303367	-0.0124864	0.170983	0.0663478	0.191007	0.140061	0.16794	0.0791663	0.166795	0.220469	0.0805798	0.292831	0.122434	0.0554757	0.134435	0.028458	0.0525409	0.0207298	0.0744766	-0.0657716	0.0524377	0.297753	0.0865275	0.0172123	0.39195	0.0873145	0.183125	0.419991	0.0478598	-0.0481017	0.122739	0.31105	0.0632976	0.098835	0.229915
	105	0.0287709	0.0410521	-0.00772943	0.0199281	0.15293	0.0541093	0.2151	0.142768	0.169691	0.0492129	0.163059	0.182443	0.123801	0.262314	0.0768353	0.0532866	0.11864	0.048264	0.0496107	0.0174089	0.0682391	-0.0462486	-0.00476614	0.29822	0.060343	0.00751112	0.408961	0.0738478	0.190795	0.387776	0.0446228	-0.0649131	0.122327	0.269273	0.0697346	0.0906395	0.260094
	108	0.0502878	0.0285914	-0.0329185	-0.00264874	0.128583	0.0868395	0.21753	0.14446	0.173216	0.041614	0.131279	0.162785	0.119447	0.24215	0.113151	0.0371715	0.119773	0.0405387	0.0351615	0.016589	0.0831976	-0.0977127	0.0490897	0.281554	0.0586592	-0.00550698	0.39765	0.0756897	0.149196	0.382678	0.0446452	-0.0918113	0.0903817	0.248906	0.0474165	0.12631	0.301296
	111	0.0285345	0.0272582	-0.0251701	-0.0301988	0.108499	0.0540605	0.20335	0.117079	0.184103	0.00113622	0.149384	0.181056	0.126697	0.259005	0.15007	0.0533496	0.128178	0.0350033	-0.0069993	-0.010256	0.069	-0.116779	0.035627	0.281288	0.0581158	0.0162026	0.416723	0.0768026	0.169803	0.347143	0.0310719	-0.099445	0.185787	0.224752	0.0378976	0.11689	0.258454
	114	0.0293179	0.053405	-0.0312606	-0.00886795	0.109722	0.0587584	0.187514	0.103383	0.180173	0.0543474	0.123827	0.170387	0.102335	0.204796	0.141686	0.0395588	0.133785	0.0332694	0.0193442	-0.0409872	0.0804577	-0.120121	0.0996335	0.27373	0.0303069	-0.000395768	0.446121	0.0783108	0.175443	0.325231	0.0357445	-0.0986859	0.085215	0.170139	0.0142	0.0845399	0.283822
	117	0.0388373	0.0342726	-0.00665504	-0.0195986	0.0981241	0.0688189	0.201356	0.154435	0.204594	0.0560445	0.0981672	0.15012	0.0707265	0.198766	0.167499	0.031425	0.136851	0.0388178	0.0242186	-0.0445499	0.0864195	-0.134238	0.143109	0.286055	-0.00706664	-0.0090279	0.430072	0.0938364	0.155257	0.327742	0.0261931	-0.099393	0.089663	0.183712	0.0281242	0.0738687	0.233269
	120	0.0195578	0.0366246	-0.029869	0.00656921	0.0928815	0.0563086	0.20299	0.139422	0.172695	0.0286428	0.0902539	0.145572	0.102864	0.159273	0.104674	0.0277948	0.140926	0.041652	-0.0117728	-0.0385765	0.0785459	-0.0877965	0.0874605	0.257101	-0.045498	-0.0111195	0.411738	0.111283	0.152904	0.301296	0.0270128	-0.120647	0.146897	0.158118	0.0595318	0.081904	0.233609
	123	0.0188885	0.0250511	-0.0215879	-0.0165118	0.0733219	0.0454677	0.184361	0.178324	0.201588	0.0494713	0.132582	0.159939	0.0847872	0.156094	0.120445	0.0181669	0.110685	0.0103507	-0.0536624	-0.0560367	0.0674043	-0.0980464	0.234129	0.251379	-0.0601554	-0.0175731	0.33056	0.0868949	0.148264	0.287465	0.0162148	-0.104711	0.158319	0.115379	0.0637179	0.0223639	0.209712
	126	0.00198112	0.0465889	-0.0293808	-0.00955793	0.0792065	0.0801175	0.1777	0.201811	0.187353	-0.0070356	0.117756	0.138703	0.0818838	0.149325	0.136184	0.0280802	0.133272	0.043543	-0.0631871	-0.0347902	0.0800452	-0.0866733	0.201866	0.234705	-0.0194171	-0.00977654	0.387889	0.0939748	0.143189	0.254011	-0.00304706	-0.0876602	0.207317	0.0679639	0.0532696	-0.0190118	0.264127
	129	0.0200116	0.0659337	-0.04815	-0.00385045	0.0779541	0.0667786	0.173402	0.185783	0.180255	-0.0174056	0.101354	0.13106	0.0779802	0.139375	0.149971	0.0177962	0.13029	0.0543848	-0.0804853	-0.0655562	0.0808149	-0.0758655	0.257652	0.243907	-0.0435075	-0.0222431	0.334503	0.0959439	0.142952	0.239364	0.00687031	-0.0556705	0.200854	0.0989418	0.0505678	0.0122857	0.288253
	132	0.00777407	0.051246	-0.0815312	-0.0243637	0.0601557	0.0857315	0.160153	0.180835	0.132922	-0.00522609	0.106403	0.136752	0.0744449	0.137269	0.140156	0.0275882	0.134189	0.0555704	-0.0781411	-0.0417071	0.0648331	-0.14546	0.240048	0.219274	-0.0820092	-0.0255321	0.278226	0.119931	0.146317	0.227761	0.0194022	-0.109111	0.224444	0.0856278	0.040399	0.0269404	0.211883
	135	0.018215	0.0250349	0.00930654	-0.016586	0.0415431	0.0509149	0.162027	0.220669	0.157127	-0.0280151	0.107516	0.126769	0.0575318	0.140992	0.103273	0.00684089	0.106593	0.0763707	-0.0675432	-0.0539513	0.0769387	-0.109484	0.179776	0.20432	-0.0649643	-0.0203576	0.29237	0.0998633	0.134586	0.190621	0.0198269	-0.0931211	0.215558	0.103552	0.0434449	-0.000310196	0.243027
	138	0.0156083	0.0221851	-0.0452018	-0.0573991	0.0274766	0.0799388	0.134886	0.220796	0.167207	0.00537171	0.0914744	0.126426	0.0615902	0.154492	0.162579	0.0100587	0.121134	0.0806147	-0.0738566	-0.0304348	0.0681476	-0.0846888	0.126354	0.191237	-0.0736965	-0.0122834	0.269017	0.0981932	0.118118	0.183502	0.0196723	-0.0884313	0.15516	0.0257151	0.0603141	0.00613705	0.2493
	141	0.0298375	0.0154163	-0.0259103	-0.0634825	0.0471031	0.0541741	0.153608	0.205342	0.173249	0.029916	0.0691357	0.128818	0.049678	0.133617	0.0944973	0.0147186	0.109739	0.0487881	-0.0763617	-0.034981	0.0666152	-0.11367	0.0722599	0.188688	-0.0846667	-0.0218269	0.234809	0.10604	0.126188	0.181964	0.0061351	-0.106386	0.145739	0.0527004	0.0318437	0.0362454	0.296427
	144	0.013279	0.0518539	-9.60721e-05	-0.0397293	0.0354531	0.053986	0.143944	0.243915	0.138062	0.0300491	0.0729528	0.116011	0.0484848	0.151012	0.110524	0.0120899	0.102463	0.0525746	-0.0261397	-0.0243385	0.0793096	-0.117093	0.0848255	0.174911	-0.0339357	-0.0182436	0.23766	0.0825588	0.11195	0.168914	-0.0570501	-0.102093	0.138376	0.0631434	0.0677184	-0.00110263	0.405861
	147	0.00772501	0.00810138	-0.0175969	-0.0581262	0.0240869	0.0871729	0.151376	0.225091	0.132701	0.0132852	0.0690104	0.113502	0.0414442	0.151084	0.117897	0.00741023	0.0802963	0.08389	-0.00498377	-0.0242053	0.0721213	-0.0679707	0.0562162	0.172084	-0.0520354	-0.0171684	0.217384	0.0932634	0.129097	0.160882	0.0069431	-0.0949311	0.130637	0.0829984	0.0582398	0.00190315	0.230967
	150	0.0180211	0.0268006	-0.0153329	-0.0259094	0.0314967	0.0821029	0.136793	0.204437	0.160745	0.000454023	0.0558398	0.113264	0.0265647	0.119937	0.134888	0.0125151	0.0493876	0.0223614	-0.0186212	-0.00861342	0.0772049	-0.105493	0.0654878	0.155901	-0.030553	-0.0194547	0.213165	0.0805266	0.150666	0.146115	-0.0634778	-0.118113	0.138651	0.0799028	0.0120204	0.0275274	0.209524
	153	-0.00696113	0.0360672	-0.00708834	-0.0422064	0.0235497	0.0828629	0.140294	0.165802	0.130275	-0.0390608	0.037098	0.109118	0.0358115	0.112555	0.113862	0.0108569	0.0436051	0.0209367	-0.0302632	0.0181283	0.0901628	-0.0855468	0.0378268	0.146124	-0.0112345	-0.0371769	0.173033	0.0655822	0.106211	0.135599	0.0148988	-0.0910069	0.100718	0.0790044	0.0131092	-0.0154655	0.226381
	156	0.0184713	0.0236802	-0.0206906	-0.0682761	0.0252371	0.0669942	0.133735	0.196527	0.147712	0.000302535	0.0477371	0.10846	0.0448792	0.125516	0.089547	0.0101383	0.0338183	0.0351478	-0.02581	-0.0102382	0.0685667	-0.122978	0.0824383	0.149666	-0.0417075	-0.0346887	0.188223	0.0653758	0.100478	0.139381	-0.0087559	-0.112056	0.144677	0.109311	0.0161868	-0.0322208	0.23907
	159	0.00655941	0.0339847	-0.043454	-0.0345835	0.0132954	0.0680367	0.120959	0.213196	0.14408	-0.00553267	0.0563223	0.106623	0.0323269	0.13777	0.106865	0.016086	0.0347493	0.0134982	-0.00280905	0.0220684	0.0824639	-0.127595	0.0710218	0.131598	-0.0126772	-0.00878981	0.172511	0.0669574	0.0608717	0.114635	0.0124605	-0.106501	0.109162	0.0928704	0.0188001	-0.000411158	0.278592
	162	-0.000857889	0.0365591	-0.0147582	-0.028934	0.0341394	0.081909	0.109298	0.233261	0.118789	-0.00689515	0.0581628	0.118931	0.0290878	0.125894	0.0773524	0.00839602	0.0290055	0.0319182	-0.0283108	0.0295263	0.078015	-0.0813743	0.0859648	0.1305	-0.0142636	-0.0300905	0.169721	0.0828898	0.0816553	0.121619	-0.00856834	-0.120896	0.120482	0.0783049	0.0130494	0.00127043	0.245332
	165	-0.00376711	-0.00210562	-0.00435597	-0.0238934	0.0198317	0.0679545	0.105238	0.212285	0.0888998	-0.0364127	0.0672759	0.103385	0.0242992	0.125556	0.0802233	0.00706628	0.0541355	0.0443205	-0.0240173	0.0221284	0.0734789	-0.08626	0.11191	0.122234	-0.0142818	-0.0371081	0.17081	0.0616278	0.071401	0.124087	0.00982344	-0.107222	0.112276	0.0797861	0.0141732	-0.00942373	0.230907
	168	-0.00134524	0.0367121	-0.0229718	-0.065107	0.00847578	0.085814	0.0976757	0.158979	0.0717127	-0.0621594	0.0500569	0.100314	0.0270343	0.144076	0.0718049	0.00503495	0.0504988	0.0041152	-0.0147599	0.0161669	0.0732445	-0.119773	0.0418557	0.109228	-0.0360466	-0.0363315	0.162268	0.0518299	0.0737424	0.099042	0.0203375	-0.121371	0.108712	0.0616101	0.106516	-0.0193377	0.246147
	171	0.000651485	0.0237088	-0.0624509	-0.06144	-0.00578683	0.0648816	0.111528	0.232216	0.125298	-0.0623425	0.039031	0.099775	0.0289597	0.144159	0.105301	0.0194159	0.0483038	0.038398	-0.00880311	0.033857	0.0510318	-0.114236	0.00309401	0.110785	-0.0376938	-0.0348719	0.153287	0.067821	0.108112	0.111984	0.0138664	-0.135043	0.130351	0.0572333	0.0687142	-0.011098	0.274155
	174	0.0106332	0.0453946	-0.0732451	-0.0339324	0.0264445	0.0477992	0.0864238	0.108897	0.1208	-0.118785	0.0372715	0.10042	0.022601	0.139717	0.0659011	0.0133111	0.0673531	0.0143457	-0.00144128	0.00472764	0.0540201	-0.115727	-0.0130311	0.127671	-0.0515187	-0.0191834	0.138762	0.0654959	0.122048	0.0918877	0.0490646	-0.16512	0.117275	0.0719206	0.0475106	0.014926	0.25549
	177	0.00765079	0.0167346	-0.0361021	-0.0651725	0.00217673	0.059403	0.0950589	0.12037	0.0881564	-0.0564699	0.0378636	0.0915072	0.0342786	0.140239	0.056735	0.005043	0.048764	0.0533908	-0.0442293	0.0170795	0.057701	-0.0796201	0.134184	0.096472	-0.0376349	-0.0226196	0.128719	0.0798582	0.0651481	0.101546	0.0278348	-0.112734	0.128464	0.0679947	0.0445831	-0.00948456	0.245786
	180	0.0102817	0.0365162	-0.0593869	-0.0340878	0.0115429	0.0643127	0.109013	0.122904	0.100306	-0.046554	0.044006	0.0853837	0.0218221	0.0835919	0.0929028	0.00760209	0.0394324	0.0196313	-0.0147178	0.0302274	0.0738332	-0.0987826	0.034632	0.101832	-0.022096	-0.0152738	0.14574	0.0846754	0.0974319	0.0864456	0.0280643	-0.106448	0.117673	0.0411558	0.0410262	0.00380416	0.222284

## Sheet: FigureS1E
Figure S1E
	Decay constant (s-1)
	WT MEF	IRSp53-/- MEF
	0.0196807	0.00918794
	0.00128771	0.0349286
	0.00819698	0.0254312
	0.0211523	0.0300193
	0.0163776	0.0137023
	0.0362221	0.0324345
	0.0197229	0.00857193
	0.0108059	0.0218446
	0.0647197	0.0122405
	0.029256	0.0724318
	0.0245997	0.0409272
	0.0167772	0.00731862
	0.0306249	0.0252812
	0.0568934	0.0174958
	0.0305759	0.0114971
	0.0182247	0.0507609
	0.0340786	0.0178885
	0.00639141
	0.0308334
	0.00506307

## Sheet: FigureS1H
Figure S1H
	Relative Gene Expression
		BAIAP2 (IRSp53)			BAIAP2L1 (IRTKs)			BAIAP2L2 (Pinkbar)			MTSS1 (MIM)			MTSS1L (ABBA)
		Mean	SEM	N	Mean	SEM	N	Mean	SEM	N	Mean	SEM	N	Mean	SEM	N
	WT	1	0.0326598	3	1	0.0404441	3	0	0	3	1	0.0600105	3	1	0.0300559	3
	IRSP53-/-	0	0	3	10.03	0.201	3	0	0	3	29.8364	0.262774	3	0.621862	0.0209961	3
	IRSP53-/-C/C9IRTKS	0	0	3	1.1998	0.053875	3	0	0	3	27.5567	0.706417	3	1.34195	0.028271	3

## Sheet: FigureS1I
Figure S1I
	Fluorescence versus time
	Time (s)	WT MEF																		IRSp53-/- C/C9 IRTKS
	0	1.33843	2.08982	0.876465	1.30286	0.697775	0.856367	1.70675	0.389614	0.962297	0.712952	0.812543	1.03097	1.35731	1.07565	0.549913	0.915945	0.558994	0.765837	1.43511	1.16223	0.729951	0.707644	1.34449	1.22387	1.79223	1.24908	0.80885	1.98741	3.50291	1.65218	1.78468	1.3873	1.75137	1.9388	2.66052
	3	1.25842	2.00995	0.793913	1.48245	0.958495	0.580279	1.63084	0.363214	0.76447	0.56746	0.637969	0.991638	1.12068	0.807577	0.437031	0.64596	0.434973	0.485667	0.88326	1.13985	0.600596	0.310494	0.954777	0.336853	1.36888	0.815681	0.672042	1.46969	2.75007	1.24489	1.39682	0.759095	1.43766	1.142	2.31241
	6	0.168826	1.93715	0.428795	1.46145	0.902923	0.634926	1.38428	0.364728	0.667001	0.44513	0.501968	1.01013	0.893435	0.656061	0.393499	0.449015	0.380899	0.342469	0.988498	1.12463	0.231892	0.172322	0.649952	1.88078	0.981333	0.919866	0.499623	1.09033	2.23703	0.889898	1.03809	0.327181	1.13802	0.959916	2.00127
	9	0.590018	1.9346	0.539265	1.39073	0.617173	0.621514	1.44214	0.358486	0.637442	0.362951	0.411843	0.934486	0.940718	0.429962	0.38392	0.392134	0.244201	0.345186	0.892571	0.984513	0.65161	0.0479332	0.407183	1.75291	1.02236	0.883175	0.347951	0.716959	1.8144	0.499963	1.12401	0.524728	1.03598	0.664094	1.85406
	12	1.20039	1.85902	0.614669	1.17052	0.777243	0.622757	1.45167	0.348636	0.576395	0.303778	0.33592	0.93557	0.756087	0.447854	0.359284	0.296333	0.303195	0.417688	0.895167	0.848182	0.667055	0.00632644	0.326486	1.58379	1.24937	0.864684	0.236089	0.380914	0.977785	0.363501	1.03757	0.508492	0.670465	0.505956	1.7069
	15	1.23542	1.81135	0.666707	1.21598	0.71259	0.628371	1.36862	0.325538	0.566383	0.240944	0.319918	0.974306	0.717	0.454895	0.334984	0.310182	0.285551	0.454784	0.972246	0.735803	0.626261	0.0576575	0.304659	1.49981	1.19526	0.893374	0.177408	0.641395	1.23258	0.382971	1.02879	0.231537	0.85067	0.392172	1.7404
	18	1.21365	1.75184	0.684835	1.17257	0.682442	0.55412	1.32897	0.330563	0.549535	0.211787	0.291797	0.960026	0.651447	0.392958	0.296635	0.338165	0.257598	0.420565	0.95908	0.546631	0.546695	0.071827	0.192408	1.45621	1.11331	0.875631	0.126989	0.59701	1.10301	0.344534	0.901769	0.154411	0.862018	0.140411	1.68709
	21	1.22587	1.67685	0.670672	1.05751	0.62809	0.510957	1.26779	0.312242	0.540244	0.169942	0.248209	0.93558	0.613146	0.297873	0.30042	0.292696	0.263789	0.379992	0.946094	0.592515	0.422462	0.0660018	0.218448	1.44212	1.11757	0.851463	0.0912349	0.511743	1.03827	0.176551	0.877373	0.0537581	0.829356	0.230553	1.61028
	24	1.13616	1.46108	0.629122	1.03612	0.592517	0.464388	1.18222	0.312436	0.529246	0.159266	0.218539	0.799919	0.516713	0.26905	0.296766	0.27741	0.255867	0.373734	0.945764	0.513031	0.380793	0.0800023	0.17844	1.46608	1.09792	0.814535	0.0866927	0.54092	0.977395	0.145308	0.791895	0.00528551	0.634182	0.318462	1.48144
	27	1.05577	1.54853	0.648867	0.989195	0.518076	0.460331	1.1468	0.209768	0.540083	0.136819	0.214185	0.835577	0.450852	0.224751	0.294416	0.285088	0.240246	0.309406	0.864941	0.521546	0.338546	0.0857341	0.118135	1.43226	1.04025	0.770703	0.0559739	0.524535	0.856121	0.16101	0.732001	-0.0574785	0.600516	0.273334	1.29828
	30	1.06695	1.52566	0.637967	0.881309	0.466809	0.437318	1.13916	0.215956	0.488766	0.133386	0.204666	0.83761	0.398348	0.171194	0.299144	0.271618	0.227184	0.277008	0.819416	0.462642	0.283207	0.0730396	0.125687	1.39201	1.00492	0.682329	0.0483087	0.463578	0.89452	0.097749	0.655928	-0.0899969	0.577782	0.278641	1.17903
	33	0.724541	1.46935	0.618076	0.748443	0.457916	0.344175	1.07931	0.222644	0.483836	0.100671	0.179647	0.826182	0.330745	0.15451	0.312184	0.283856	0.217927	0.274318	0.726677	0.390445	0.315553	0.0628647	0.152066	1.37895	0.982705	0.620961	0.0361729	0.464552	0.786201	0.0990376	0.64918	-0.137519	0.551974	0.210347	0.971487
	36	0.997845	1.4115	0.60272	0.737561	0.415132	0.300922	1.03553	0.216371	0.478902	0.0612354	0.122168	0.821302	0.305279	0.130077	0.314557	0.281667	0.226349	0.274508	0.698008	0.348887	0.299126	0.0933644	0.145463	1.24324	0.882351	0.600924	0.0394106	0.352662	0.689902	0.0593052	0.639154	-0.0887942	0.513232	0.173421	1.34297
	39	0.987898	1.20298	0.577208	0.617667	0.368643	0.31487	1.01975	0.213133	0.419195	0.0536624	0.10243	0.786872	0.207371	0.142153	0.305674	0.266942	0.212605	0.252405	0.694962	0.334195	0.285145	0.0540486	0.0585298	1.19917	0.839007	0.556061	0.0278508	0.407372	0.625974	0.0363564	0.618082	-0.105045	0.460795	0.184049	1.25673
	42	0.947661	1.27217	0.553871	0.643313	0.332485	0.336682	0.965099	0.206898	0.355042	0.0355309	0.0718829	0.796541	0.221601	0.130992	0.29753	0.256786	0.212124	0.256956	0.639653	0.271709	0.271045	0.0514828	0.0772203	1.15901	0.843272	0.511086	0.0250799	0.335244	0.549674	0.0797336	0.601205	-0.114168	0.443079	0.21061	1.17138
	45	0.876882	1.20876	0.5315	0.63196	0.290229	0.325112	0.902045	0.209058	0.340221	0.0408175	0.147042	0.794306	0.22965	0.127226	0.299818	0.230087	0.207647	0.21582	0.580302	0.201668	0.250853	0.00981915	0.0676137	1.18323	0.845161	0.466847	0.0288655	0.350973	0.396178	-0.00138386	0.516604	-0.132329	0.428581	0.25464	1.12203
	48	0.833639	1.16012	0.497647	0.580347	0.251095	0.301026	0.855394	0.196526	0.3197	0.070352	0.135703	0.779986	0.154858	0.111203	0.290348	0.233269	0.189644	0.191317	0.545064	0.171478	0.230358	0.021335	0.0450934	1.1824	0.790451	0.451116	0.0189016	0.388405	0.336454	0.0368924	0.42135	-0.103218	0.389365	0.258273	0.836106
	51	0.74809	1.04894	0.499254	0.465792	0.219619	0.294982	0.805038	0.191369	0.281004	0.0571978	0.140959	0.667128	0.146894	0.10765	0.268916	0.240024	0.191689	0.174507	0.496312	0.221906	0.222304	0.0263792	0.0702294	1.23059	0.719274	0.403287	0.0150347	0.323445	0.371648	0.0249693	0.504843	-0.112509	0.384796	0.294829	0.758365
	54	0.742978	1.02786	0.495358	0.483649	0.203604	0.251316	0.732986	0.186924	0.285409	0.0513976	0.137655	0.663739	0.144731	0.105021	0.219862	0.251132	0.184366	0.162034	0.474227	0.212083	0.207597	0.00524546	0.0404089	1.21584	0.740047	0.354413	-0.00459684	0.297877	0.355863	0.0025347	0.488328	-0.0893927	0.338878	0.282911	0.777949
	57	0.715638	0.944885	0.467349	0.437191	0.17404	0.198587	0.696964	0.176184	0.267088	0.0452799	0.123879	0.634156	0.123573	0.112035	0.231163	0.224401	0.179857	0.131819	0.506718	0.10234	0.179241	-0.0554187	0.0531768	1.18617	0.751852	0.335322	0.00928274	0.287276	0.227351	0.0166277	0.521684	-0.125133	0.273944	0.212735	0.722149
	60	0.708167	0.819675	0.434245	0.408449	0.14913	0.204493	0.665724	0.162522	0.255575	0.047384	0.121519	0.640981	0.0987855	0.0892842	0.235756	0.225856	0.164027	0.12803	0.471025	0.202536	0.172199	-0.0327184	0.059884	1.15439	0.77009	0.258659	0.0138375	0.27088	0.197549	0.0915789	0.394823	-0.141211	0.293135	0.213102	0.603404
	63	0.69413	0.800985	0.437992	0.370963	0.136855	0.218131	0.627717	0.151906	0.240595	0.0261955	0.0970434	0.662629	0.0745418	0.0465727	0.227353	0.224849	0.161618	0.0975663	0.427774	0.182313	0.171506	-0.0572138	0.0401363	1.09976	0.671915	0.239899	0.00726726	0.287059	0.205062	0.0711227	0.513165	-0.106509	0.259076	0.324684	0.574628
	66	0.484034	0.773101	0.402026	0.343868	0.131896	0.220167	0.591771	0.148377	0.189149	0.0304582	0.0802571	0.538691	0.0820718	0.0602075	0.221467	0.220557	0.158279	0.0847255	0.426671	0.189055	0.184442	-0.0800491	0.0403111	1.12883	0.601736	0.202696	0.0097538	0.278398	0.179426	0.0591605	0.527433	-0.110561	0.292158	0.421126	0.573273
	69	0.417948	0.670168	0.397827	0.311937	0.101391	0.217746	0.576278	0.136073	0.165026	0.0231562	0.0850646	0.50208	0.0873503	0.117117	0.198007	0.209166	0.14685	0.083642	0.415019	0.18856	0.135118	-0.0330048	0.0478502	1.1326	0.582862	0.14492	0.00805839	0.223134	0.137665	0.0421151	0.477387	-0.114424	0.272695	0.411909	0.535898
	72	0.596701	0.617096	0.387346	0.278909	0.0939808	0.218832	0.54047	0.131072	0.179084	0.0269965	0.0912648	0.474297	0.0668016	0.0923171	0.18314	0.194498	0.149611	0.081965	0.368387	0.17647	0.14708	0.0409295	0.0582717	1.00768	0.545547	0.138456	0.00541723	0.243874	0.182453	0.0267154	0.476029	-0.131427	0.272212	0.414355	0.478005
	75	0.199158	0.548004	0.377834	0.245845	0.0548277	0.209256	0.530175	0.122471	0.155628	0.0265116	0.0878233	0.491061	0.0557182	0.0525951	0.184445	0.191919	0.136885	0.0668331	0.332999	0.186429	0.116472	0.0687247	0.0398969	1.01566	0.548398	0.117152	-0.00234615	0.24874	0.164781	0.0200153	0.469771	-0.126452	0.263656	0.363231	0.49185
	78	0.154229	0.514507	0.358017	0.222585	0.0630806	0.17905	0.490341	0.114882	0.141279	0.0311172	0.0828993	0.475456	0.0413063	0.0546386	0.18976	0.19413	0.0903378	0.049723	0.301705	0.169561	0.110159	0.0205617	0.0482256	0.997465	0.496914	0.118625	-0.000812529	0.243092	0.138653	0.0295306	0.438393	-0.140059	0.269079	0.337167	0.441232
	81	0.480854	0.478637	0.347935	0.19024	0.0553374	0.157267	0.471413	0.115934	0.126847	0.0362207	0.083231	0.46193	0.0530163	0.0622855	0.181577	0.172907	0.128348	0.0532127	0.24906	0.193906	0.116072	-0.0245415	0.0340498	0.983795	0.447505	0.111987	0.00466166	0.254523	0.129009	0.0859099	0.43066	-0.168473	0.233514	0.266256	0.34323
	84	0.464743	0.43679	0.332181	0.166825	0.0400011	0.145531	0.429783	0.101538	0.0986674	0.0469418	0.0917499	0.459087	0.0224545	0.0520552	0.149002	0.164167	0.115801	0.0500752	0.279274	0.196286	0.122848	-0.0291423	0.0746758	0.94263	0.43216	0.0915771	-0.00278721	0.251551	0.140394	0.0740433	0.439149	-0.152457	0.287277	0.179301	0.331752
	87	0.460201	0.402705	0.305906	0.16358	0.0233945	0.141974	0.407674	0.0961355	0.0942056	0.0500144	0.0819863	0.419763	1.85665e-05	0.0430004	0.177109	0.158702	0.104768	0.0451977	0.227344	0.211246	0.107636	0.0249015	0.0672848	0.953024	0.418778	0.0725225	0.0125518	0.280895	0.110875	-0.00173574	0.419128	-0.124449	0.297028	0.254518	0.32106
	90	0.411458	0.386372	0.298617	0.163007	0.0192465	0.138233	0.369581	0.0950361	0.116086	0.0305125	0.0856563	0.418281	-0.0317833	0.0322904	0.177026	0.160538	0.0952422	0.0457947	0.221844	0.2047	0.102245	0.0316408	0.0458846	0.787104	0.350814	0.0857895	0.0138633	0.261902	0.122175	0.037609	0.391251	-0.151964	0.253634	0.232021	0.331476
	93	0.409158	0.313798	0.281634	0.142516	0.0211924	0.129038	0.381336	0.0841689	0.117857	0.038747	0.076071	0.401388	0.0136158	0.0293154	0.149641	0.131909	0.0900806	0.0418377	0.192599	0.177515	0.102231	-0.00858187	0.0304001	0.782011	0.343655	0.0697499	0.0146375	0.212598	0.153623	0.0296155	0.37917	-0.139119	0.224479	0.214269	0.316007
	96	0.418019	0.247974	0.257546	0.125438	0.00823443	0.125757	0.332255	0.0765395	0.0982015	0.0309772	0.078166	0.394608	-0.00445914	0.0496679	0.144084	0.12813	0.0931639	0.0383516	0.151374	0.190609	0.0978693	0.00715146	0.0511314	0.762485	0.329681	0.0502754	0.0222499	0.200406	0.149197	0.0456653	0.367833	-0.103383	0.210627	0.202529	0.346106
	99	0.416215	0.245122	0.275005	0.131584	-0.00482947	0.126444	0.328219	0.0766346	0.0900622	0.0351927	0.0820291	0.400596	-0.00924194	0.0438309	0.129889	0.148575	0.0871662	0.0209357	0.159739	0.184809	0.0830355	-0.0106593	0.096179	0.726059	0.305376	0.0366261	0.0064148	0.224517	0.0439351	-0.0259555	0.330196	-0.137185	0.213165	0.207531	0.332846
	102	0.383525	0.244093	0.267677	0.13239	-0.020354	0.126071	0.304656	0.0724784	0.0987924	0.0338855	0.0762891	0.38012	0.023017	0.0683542	0.143751	0.130464	0.0866419	0.0366906	0.161643	0.178672	0.0890907	-0.0606857	0.0541975	0.688768	0.335279	0.0320719	0.000927102	0.24397	0.0408105	-0.0408082	0.350021	-0.186005	0.182528	0.253613	0.355199
	105	0.39788	0.176109	0.250017	0.0911942	-0.00348633	0.119298	0.284501	0.0706577	0.0789286	0.0321729	0.0661683	0.367208	0.0660965	0.0552262	0.121076	0.0951651	0.0762716	0.0159626	0.0894658	0.161334	0.0781738	-0.0131755	0.0913477	0.721762	0.311399	0.0210927	-0.0120073	0.21432	0.0599795	-0.0156296	0.303284	-0.135021	0.207202	0.178857	0.269773
	108	0.427184	0.161233	0.207844	0.0896396	-0.00817347	0.0995475	0.272148	0.0645311	0.0637699	0.021856	0.0740581	0.352579	0.0702247	0.0473109	0.12274	0.0955865	0.0741229	0.0161785	0.13199	0.161505	0.0641884	-0.0100607	0.0803151	0.684123	0.292582	0.0215421	-0.00319753	0.218661	0.0929626	0.00579666	0.340698	-0.149494	0.210935	0.170485	0.291284
	111	0.411269	0.179217	0.0620817	0.0842649	-0.0152686	0.105918	0.285154	0.0565827	0.061279	0.0398989	0.0739329	0.35066	0.0635338	0.0415672	0.112221	0.101131	0.0731636	0.0112094	0.137393	0.178342	0.0662812	0.0148785	0.0522422	0.601436	0.301682	0.0133177	0.00684993	0.205201	0.119916	-0.0209476	0.358214	-0.169247	0.211699	0.152171	0.285026
	114	0.392198	0.132735	0.249652	0.0595628	-0.00637047	0.0981439	0.243734	0.0556013	0.0502123	0.034393	0.0730933	0.342575	0.078857	0.0427041	0.0944859	0.10794	0.0683998	0.0193095	0.122192	0.175162	0.0712559	-0.0134293	0.0433228	0.542755	0.290485	0.0182298	0.00236504	0.182023	0.159974	0.0457269	0.322992	-0.165375	0.219498	0.128413	0.335058
	117	0.377021	0.132956	0.231971	0.0644131	-0.0136873	0.0909355	0.242306	0.0537623	0.0615578	0.0374472	0.075617	0.317272	0.0335466	0.0353598	0.0732936	0.0982393	0.0614838	0.00373282	0.120402	0.157555	0.0550437	-0.0109531	0.0530928	0.567532	0.291943	-0.00769048	0.0128494	0.170778	0.0882508	0.0158223	0.316179	-0.169858	0.206771	0.150815	0.286328
	120	0.356164	0.116435	0.210284	0.0709087	-0.0280215	0.095946	0.203924	0.0514972	0.0619585	0.0342357	0.0854158	0.310669	0.0416666	0.0662678	0.0830603	0.0919418	0.0624228	0.0189213	0.101848	0.173777	0.0624152	-0.00051216	0.0417212	0.57571	0.231796	0.00143364	-0.00398289	0.199219	0.0820077	0.0570399	0.310951	-0.150628	0.187026	0.161729	0.329656
	123	0.370753	0.10314	0.213682	0.0491619	-0.0308102	0.0973801	0.229436	0.0480596	0.0769688	0.0438357	0.0840183	0.303388	0.0605355	0.0659719	0.0827612	0.0675937	0.0521362	0.00571252	0.0819452	0.147264	0.0787114	-0.0117064	0.0556155	0.575783	0.234782	0.00569769	-0.00374008	0.171545	0.139856	0.00768364	0.295196	-0.152631	0.167146	0.149086	0.328078
	126	0.362593	0.134801	0.199576	0.0317933	-0.034243	0.0916819	0.210748	0.0454819	0.0630765	0.0230555	0.0777776	0.286268	0.0490733	0.0650464	0.0870979	0.0971832	0.0595175	0.00136615	0.0687383	0.148528	0.0653056	-0.00279317	0.0552532	0.525082	0.219939	-0.00488307	-0.00509115	0.158506	0.110277	0.0275155	0.344127	-0.181522	0.19792	0.1351	0.276832
	129	0.33881	0.107038	0.205756	0.0210498	-0.024491	0.0888472	0.198578	0.0416283	0.0809627	0.0148367	0.0698617	0.257419	0.0472021	0.0590088	0.0721417	0.084159	0.0701816	-0.00293313	0.06762	0.1306	0.0739613	-0.0169995	0.0543026	0.484803	0.226147	-0.00203943	-0.0166345	0.161145	0.12018	0.0507683	0.334796	-0.179971	0.132518	0.148255	0.340041
	132	0.357127	0.120387	0.163599	0.030542	-0.0303309	0.0780422	0.18643	0.0424088	0.0773768	0.0246195	0.0744917	0.254878	0.0785505	0.0532424	0.0668596	0.0949411	0.0586282	0.000542544	0.0668846	0.154361	0.0478566	0.00405107	0.0361034	0.417503	0.195318	-0.0050617	-0.0074102	0.128631	0.16834	0.047246	0.36523	-0.163272	0.181669	0.115534	0.325351
	135	0.318834	0.115605	0.165952	0.0258367	-0.0241464	0.0820588	0.189283	0.0353782	0.0946193	0.0336582	0.0686813	0.224278	0.0790431	0.0576038	0.0615897	0.103322	0.0648527	-0.0128209	0.0705978	0.133883	0.0550932	0.0107132	0.0458748	0.408588	0.177872	-0.0300404	-0.0024976	0.111401	0.128908	0.00140354	0.341386	-0.174955	0.162406	0.109811	0.277118
	138	0.324839	0.0830001	0.151602	0.0241902	-0.0350618	0.0770292	0.166132	0.0362058	0.0420241	0.0371871	0.0783641	0.229406	0.0242962	0.0431377	0.0543755	0.100479	0.0598545	-0.00538636	0.0571931	0.144649	0.0546513	-0.0096886	0.050963	0.409153	0.159798	-0.0147126	0.00163049	0.0903488	0.0962208	0.0492347	0.307737	-0.181278	0.152598	0.0909617	0.282034
	141	0.304488	0.0805137	0.17362	0.00904125	-0.0265109	0.0784609	0.154762	0.0357251	0.0516908	0.0260877	0.0852589	0.216736	0.0370096	0.046279	0.0493111	0.0880173	0.0687906	-0.0111067	0.0592834	0.144522	0.0486201	0.00919965	0.0368868	0.398731	0.183306	-0.0239117	-0.00501933	0.0786923	0.0604765	-0.00849408	0.300328	-0.16489	0.132338	0.13057	0.322368
	144	0.278833	0.0541256	0.181234	0.0128478	-0.0389136	0.0884591	0.156857	0.0332432	0.02293	0.00546556	0.0751432	0.234211	0.0514685	0.0607186	0.0380714	0.100061	0.0565554	-0.0111384	0.0859882	0.135943	0.06367	0.0168733	0.0433089	0.447498	0.200032	-0.00699316	-0.00501573	0.0717412	0.164628	0.037055	0.260304	-0.186099	0.139101	0.0918595	0.285617
	147	0.275063	0.0812156	0.153401	0.00403276	-0.0252088	0.0808981	0.183315	0.0333266	0.00699574	0.0191565	0.0702651	0.205106	0.0500063	0.0619943	0.0297577	0.09183	0.0553795	-0.000163479	0.126916	0.142182	0.0554028	0.0130685	0.0618464	0.373838	0.187789	-0.00721652	-0.0053461	0.0696114	0.0978369	0.0278674	0.312341	-0.181126	0.123408	0.0876791	0.221321
	150	0.25501	0.0781442	0.12608	0.0125153	-0.0244385	0.0849718	0.151576	0.0420579	0.0258211	0.028472	0.0676292	0.203243	0.0678055	0.0542738	0.0351383	0.0831009	0.0545891	-0.00527487	0.142589	0.128447	0.0502201	-0.0133486	0.0238853	0.330982	0.228482	-0.00945027	-0.012141	0.0255648	0.11604	0.0358316	0.291787	-0.198616	0.0969307	0.099115	0.228525
	153	0.234366	0.104887	0.142565	0.0224513	-0.035194	0.0885773	0.147604	0.0303727	0.0329426	0.0191979	0.0680925	0.199523	0.00717055	0.0602579	0.0276415	0.0772252	0.0470809	-0.0117717	0.114943	0.129101	0.0521509	-0.0216694	0.0377224	0.349274	0.216105	-0.024692	-0.00470791	0.0391096	0.136645	0.0124656	0.300412	-0.177667	0.111076	0.0552662	0.213228
	156	0.253008	0.11517	0.140247	0.00547206	-0.0475938	0.0841443	0.141601	0.0280949	0.0266867	0.0277266	0.073249	0.195109	0.0609843	0.0515723	0.0301833	0.0687952	0.0493957	-0.0188673	0.138575	0.119952	0.0438033	-0.0138404	0.0389949	0.363351	0.170167	-0.0247135	0.00198156	0.0340497	0.114059	-0.00916501	0.262051	-0.17731	0.131291	0.0718546	0.187212
	159	0.213856	0.0936263	0.128599	-0.0014182	-0.0255496	0.0721922	0.128069	0.0220061	0.0234289	0.0178194	0.0740789	0.183607	0.0361478	0.0451384	0.0296289	0.0547832	0.0470906	-0.0189124	0.14342	0.108079	0.0392671	-0.0200373	0.0272048	0.301955	0.227627	-0.0229455	0.0074743	0.021712	0.0959224	0.0410949	0.294066	-0.167926	0.101758	0.0793539	0.246081
	162	0.249551	0.133819	0.116479	0.0218549	-0.0155432	0.0776754	0.116921	0.0279378	0.0439475	0.0172469	0.0789117	0.184906	0.0467626	0.049386	0.0325247	0.0566081	0.0465166	-0.0156258	0.141093	0.118561	0.0453642	-0.00911989	0.0250333	0.316986	0.198512	-0.0288336	0.000531716	0.0573077	0.147144	-0.012028	0.301379	-0.214512	0.0817786	0.151299	0.207838
	165	0.248453	0.13512	0.11043	0.00629262	-0.0337255	0.0808746	0.127974	0.0283767	0.0268183	0.0171009	0.0643827	0.176422	0.0200246	0.041229	0.0146459	0.0615547	0.0467658	-0.00541757	0.102355	0.109478	0.0403133	-0.00386346	0.0578874	0.302318	0.192174	-0.0179325	0.00847993	0.0255616	0.150619	0.0424035	0.321691	-0.168288	0.0447544	0.140104	0.182688
	168	0.24167	0.119405	0.102421	0.00817246	-0.033767	0.0683933	0.114172	0.0319405	0.0138138	0.0125306	0.0599077	0.161488	0.0198464	0.0446803	0.025841	0.0630679	0.0381188	-0.0108943	0.113812	0.132014	0.0335678	0.0220614	0.0639797	0.288358	0.210553	-0.0243293	0.0099582	0.016385	0.120109	0.051841	0.300406	-0.164404	0.073276	0.166657	0.211737
	171	0.230398	0.108939	0.0959053	-0.00384683	-0.0323397	0.0573309	0.110707	0.0275064	0.0203948	0.0253	0.0598948	0.162256	0.0347866	0.0369446	0.0339421	0.0489189	0.0280323	-0.0202531	0.100675	0.145841	0.0480805	-0.00926747	0.0413074	0.287113	0.169156	-0.0416457	-0.00751552	0.0326923	0.11986	0.0301948	0.278263	-0.169466	0.0679855	0.102498	0.199001
	174	0.252416	0.130637	0.0933051	-0.00667654	-0.0423833	0.0627325	0.118135	0.0300467	0.0330051	0.00264239	0.0649186	0.141885	0.0607147	0.0434908	0.0269253	0.0487916	0.0180461	-0.00986823	0.119226	0.137282	0.0457073	0.0119416	0.0292324	0.319243	0.184273	-0.0347276	0.0041017	0.0277862	0.0720514	-0.03177	0.250713	-0.167459	0.0538441	0.0883787	0.186759
	177	0.216478	0.110071	0.0850841	-0.00121542	-0.0408751	0.06986	0.119901	0.0336744	0.0494313	0.0158745	0.0594071	0.159654	0.0120062	0.0318923	0.0420389	0.0541047	0.029279	-0.0129848	0.129689	0.144072	0.0373856	0.0187278	0.0455487	0.325635	0.160878	-0.0342368	-0.00694945	0.0364374	0.0794854	-0.0249566	0.223294	-0.163508	0.0586463	0.102851	0.151417
	180	0.240215	0.164329	0.092432	0.0208564	-0.043445	0.0661944	0.114924	0.027593	0.0454815	0.0121215	0.0739965	0.140585	0.0400403	0.0288503	0.0317328	0.0444443	0.0262531	-0.0172664	0.0976439	0.135123	0.0254828	0.0201936	0.0116975	0.233931	0.184322	-0.0264053	0.00837817	0.0238942	0.120595	0.0338343	0.245445	-0.189199	0.0742814	0.126457	0.179833

## Sheet: FigureS1J
Figure S1J
	Decay constant (s-1)
	WT MEF	IRSp53-/- C/C9 IRTKS
	0.00954176	0.0168196
	0.0148992	0.0463536
	0.00621185	0.0234048
	0.0201448	0.262864
	0.022522	0.119427
	0.0230583	5.63501e-05
	0.0146966	0.0138677
	0.0153899	0.0187279
	0.0206445	0.0984549
	0.0727888	0.0784822
	0.0686005	0.0591582
	0.00734858	0.111776
	0.043866	0.0373265
	0.0664024	0.0912602
	0.00788023	0.0385673
	0.0317577	0.150769
	0.019845	0.0253282
	0.0219678
