# Supplementary material for: A mechanosensing mechanism controls plasma membrane shape homeostasis at the nanoscale
Source: eLife. 2023 Sep 25;12:e72316. doi: 10.7554/eLife.72316 (PMC10569792; doi:10.7554/eLife.72316)
Supplement: Figure 2—source data 1. [file elife-72316-fig2-data1.xlsx]

## Sheet: Figure 2A
Figure 2A
	Fluorescence versus time
	time (s)	NHDF	Fit
	0	0.84332	0.863221
	3	0.804389	0.811765
	6	0.783685	0.763387
	9	0.71689	0.717903
	12	0.689069	0.675139
	15	0.666319	0.634934
	18	0.634289	0.597133
	21	0.616856	0.561594
	24	0.564357	0.52818
	27	0.529005	0.496765
	30	0.497947	0.467229
	33	0.45001	0.43946
	36	0.42996	0.413352
	39	0.405065	0.388806
	42	0.376543	0.365728
	45	0.349744	0.34403
	48	0.333265	0.32363
	51	0.30416	0.304451
	54	0.28582	0.286419
	57	0.261982	0.269465
	60	0.24495	0.253525
	63	0.227645	0.238539
	66	0.211641	0.22445
	69	0.19446	0.211203
	72	0.182301	0.198748
	75	0.176961	0.187039
	78	0.178599	0.17603
	81	0.157248	0.165679
	84	0.152721	0.155948
	87	0.134766	0.146798
	90	0.125385	0.138196
	93	0.122748	0.130109
	96	0.116699	0.122505
	99	0.117854	0.115356
	102	0.11339	0.108635
	105	0.112172	0.102315
	108	0.0952735	0.096374
	111	0.0917974	0.0907881
	114	0.0971763	0.0855364
	117	0.0905273	0.0805988
	120	0.0803503	0.0759565
	123	0.0724542	0.0715919
	126	0.0732363	0.0674884
	129	0.0768865	0.0636304
	132	0.0657168	0.0600031
	135	0.0606834	0.0565928
	138	0.0525317	0.0533864
	141	0.054991	0.0503719
	144	0.0516892	0.0475377
	147	0.0469239	0.044873
	150	0.0390406	0.0423677
	153	0.0439624	0.0400123
	156	0.0420108	0.0377978
	159	0.0414428	0.0357157
	162	0.0355621	0.0337582
	165	0.0401301	0.0319177
	168	0.038806	0.0301874
	171	0.0335997	0.0285605
	174	0.0280446	0.027031
	177	0.0293253	0.0255929
	180	0.0247801	0.0242409

## Sheet: Figure2B
Figure 2B
	Fluorescence versus time
	time (s)	NHDF
	0	1.10816	0.315881	0.716773	1.25569	1.26031	1.1243	0.70222	1.02084	0.639802	0.557046	0.929249	1.01368	1.66605	1.38498	1.70051	0.881003	0.722495
	3	0.687854	0.216286	0.47894	1.19772	0.493167	1.00042	0.616446	1.02422	0.429732	0.29	0.723404	0.705597	1.45777	0.990684	1.32917	0.780276	0.491056
	6	0.644888	0.315199	0.272608	1.16689	0.995474	0.871798	0.563716	0.992476	0.481857	0.230564	0.638849	0.612667	1.54425	0.795057	1.21085	0.571846	0.344427
	9	0.733272	0.420651	0.243056	1.06744	0.905779	0.751385	0.467479	0.791322	0.527448	0.228243	0.594714	0.582329	1.33852	0.644557	0.885059	0.858616	0.253961
	12	0.807988	0.412831	0.238735	1.02601	0.723659	0.704462	0.432783	0.912985	0.585683	0.176369	0.548284	0.530908	1.29361	0.535487	1.15435	0.825223	0.243663
	15	0.65795	0.390892	0.174996	0.992137	0.67198	0.636615	0.389904	0.86474	0.42814	0.11771	0.514301	0.533041	1.29692	0.458222	1.14299	0.790405	0.140635
	18	0.716818	0.388706	0.132592	0.944444	0.486868	0.61629	0.383336	0.770547	0.50142	0.0944693	0.446101	0.516259	1.28384	0.410674	1.04547	0.732913	0.111391
	21	0.659867	0.375615	0.108416	0.918487	0.560833	0.546303	0.355827	0.773288	0.461999	0.04689	0.361987	0.469076	1.24199	0.306613	1.03327	0.676827	0.0664803
	24	0.390069	0.354596	0.0774369	0.840318	0.564978	0.518772	0.34935	0.682216	0.506306	0.0438029	0.327557	0.438461	1.23026	0.23725	0.900296	0.60553	0.0572296
	27	0.451651	0.319565	0.0871395	0.787679	0.537074	0.465406	0.318686	0.640377	0.371553	0.0116756	0.314103	0.425917	1.21631	0.198131	0.815138	0.529982	0.0597763
	30	0.452192	0.28718	0.0661491	0.741434	0.513854	0.391908	0.286906	0.551268	0.250074	-0.0160522	0.289152	0.391347	1.08274	0.11712	0.726964	0.480932	0.0294027
	33	0.466168	0.270895	0.0642018	0.670057	0.465897	0.333384	0.267395	0.49753	0.250112	-0.0121092	0.282814	0.343914	1.05627	0.15206	0.658186	0.411575	0.0714137
	36	0.483027	0.278292	0.0645058	0.640202	0.324027	0.306226	0.271415	0.457428	0.254042	-0.0636711	0.262619	0.336976	1.05879	0.102374	0.579792	0.377913	0.0561947
	39	0.445561	0.2704	0.0829833	0.603134	0.336609	0.275112	0.221661	0.401063	0.251219	-0.0333276	0.248835	0.282213	1.0374	0.0592264	0.513996	0.316251	0.0134352
	42	0.406405	0.244238	0.0588568	0.560666	0.327567	0.229317	0.235171	0.3762	0.255906	-0.0542832	0.25185	0.253329	1.00874	0.0340268	0.469631	0.268824	0.087684
	45	0.371982	0.22345	0.0559672	0.520762	0.309105	0.18082	0.206769	0.313994	0.266704	-0.0628931	0.206801	0.173863	0.964481	0.0053776	0.394986	0.212369	0.0612262
	48	0.351159	0.194422	0.049811	0.496226	0.262628	0.108944	0.17428	0.236871	0.229164	-0.0705477	0.173239	0.144417	0.919106	-0.0212711	0.350444	0.195863	0.0713542
	51	0.355304	0.168077	0.0464673	0.452888	0.265095	0.0969768	0.174982	0.144689	0.211857	-0.0779739	0.163393	0.0534398	0.92319	-0.0368353	0.347989	0.141336	0.056148
	54	0.290504	0.152615	0.0281786	0.425581	0.279945	0.0465053	0.152846	0.0978715	0.213602	-0.0660218	0.132158	0.0310672	0.751734	-0.0642039	0.360304	0.105506	0.0296801
	57	0.281696	0.134737	0.0486605	0.390087	0.268524	0.0541278	0.158131	0.081591	0.0746222	-0.0430505	0.144469	0.00341948	0.714823	-0.100374	0.232594	0.116005	0.0496717
	60	0.267971	0.0698885	0.0178265	0.364726	0.250046	-0.0149861	0.112128	0.0334892	0.0913157	-0.0732518	0.134438	0.00755292	0.701142	-0.0884508	0.266591	0.0760822	0.048287
	63	0.281914	0.100981	0.0422948	0.338959	0.263393	-0.0483144	0.139274	0.0096569	0.0843177	-0.0575884	0.122091	0.0133098	0.679589	-0.0714547	0.266259	0.0566323	0.0567519
	66	0.25758	0.0965956	0.0520309	0.315129	0.222273	-0.0489786	0.122562	-0.0400546	0.0965151	-0.0750961	0.0952224	0.0175304	0.532543	-0.0783151	0.198317	0.0350028	0.0630114
	69	0.249929	0.106151	0.0535214	0.289547	0.257569	-0.0751012	0.100353	-0.040954	0.0902026	-0.0662072	0.0586148	0.0139085	0.562226	-0.0797024	0.194163	0.0175366	0.0664068
	72	0.223679	0.0912369	0.0347386	0.271444	0.260349	-0.0762536	0.090932	-0.0565555	0.0911279	-0.0883403	0.0743492	0.0529388	0.569936	-0.0481196	0.177187	0.00972674	0.0403449
	75	0.191349	0.0940128	0.032456	0.263492	0.211343	-0.0839801	0.0887531	-0.0933409	0.108679	-0.0960637	0.079764	0.0508748	0.574069	-0.0559069	0.164898	-0.00120824	0.0705481
	78	0.200327	0.102728	0.0198536	0.265931	0.246818	-0.094182	0.0767063	-0.123303	0.0970201	-0.0548411	0.102019	0.0425574	0.559173	-0.0746806	0.173627	0.0145645	0.118691
	81	0.218456	0.110696	-0.00817213	0.23414	0.24399	-0.103651	0.0918743	-0.164752	0.0862249	-0.0533462	0.0339666	0.049318	0.534447	-0.0762437	0.176324	0.000974349	0.101006
	84	0.170098	0.115127	-0.0213205	0.227398	0.210561	-0.10089	0.075969	-0.191188	0.0400787	-0.0468637	0.018811	0.0548823	0.529857	-0.106069	0.180805	0.00985306	0.0841066
	87	0.183941	0.101364	0.010414	0.200665	0.219848	-0.135342	0.0850539	-0.193232	0.0493438	-0.0364497	0.0432593	0.0443674	0.500079	-0.115442	0.138636	-0.0365871	0.0375403
	90	0.189107	0.107864	-0.00238835	0.186696	0.205986	-0.131469	0.111292	-0.18831	0.0332495	-0.0625099	0.0342374	0.0766494	0.450355	-0.140629	0.175603	-0.00168436	0.061198
	93	0.166514	0.10923	-0.0111147	0.182769	0.209102	-0.143525	0.0823818	-0.168141	0.0235747	-0.0654124	0.0490294	0.0550525	0.416466	-0.145791	0.13907	-0.0200229	0.0409669
	96	0.150603	0.0836304	-0.00242453	0.173763	0.212167	-0.122484	0.0908334	-0.224259	0.0510697	-0.0730964	0.0639489	0.0542192	0.383711	-0.124139	0.194579	0.0138055	0.0652432
	99	0.121098	0.0769196	0.0179614	0.175483	0.179473	-0.123454	0.0909917	-0.224839	0.0222492	-0.0679934	-0.00122541	0.0611796	0.362243	-0.117128	0.134237	0.00423257	0.0362004
	102	0.141889	0.0758973	-0.020851	0.168836	0.200566	-0.145172	0.0848015	-0.241968	0.0402643	-0.0613084	0.00866329	0.0373761	0.338622	-0.14695	0.129005	-0.00911946	-0.00778846
	105	0.115876	0.0712678	-0.00556302	0.167022	0.171769	-0.161934	0.0796809	-0.214195	-0.0121056	-0.0333944	0.000999361	0.0512035	0.308254	-0.133305	0.223757	0.0104049	0.0578184
	108	0.135023	0.0817461	-0.0188347	0.141861	0.183805	-0.126239	0.0398268	-0.219794	-0.0059348	-0.0367572	0.0242752	0.0579619	0.311368	-0.14833	0.114048	-0.0339438	0.0384834
	111	0.0957143	0.0717192	0.0331757	0.136685	0.164056	-0.113717	0.0614795	-0.233703	-0.0135745	-0.054149	-0.0212064	0.0918675	0.276281	-0.14066	0.126201	-0.0206468	0.0113714
	114	0.069505	0.0785076	0.00145763	0.144694	0.170091	-0.149098	0.0601212	-0.259076	0.0060758	-0.0564301	0.0188721	0.0944179	0.254522	-0.133152	0.129813	-0.0479519	0.0123335
	117	0.0847795	0.0766699	-0.00854996	0.134793	0.168227	-0.177011	0.0446476	-0.257422	-0.00211066	-0.0639351	0.0212197	0.0827441	0.232138	-0.143504	0.105991	-0.00690637	0.00708662
	120	0.0800621	0.0734526	-0.0121242	0.11964	0.164571	-0.152196	0.0373286	-0.234915	-0.0294256	-0.0582075	0.0188288	0.089338	0.234727	-0.166378	0.135305	-0.0169832	0.0140393
	123	0.0881861	0.0880773	-0.0115932	0.107883	0.164595	-0.139056	0.0521078	-0.245364	-0.0189475	-0.0687755	0.0111748	0.0932819	0.214291	-0.15695	0.126169	-0.00765783	0.0315788
	126	0.0952063	0.090626	-0.00864388	0.109047	0.155621	-0.136365	0.0625567	-0.258591	-0.0596203	-0.079016	0.0123726	0.104626	0.225331	-0.150073	0.199961	-0.0323427	0.0444302
	129	0.0975473	0.0827679	-0.0161166	0.114483	0.155904	-0.151667	0.0136541	-0.268441	-0.0358451	-0.0778595	0.032506	0.0958261	0.220067	-0.127355	0.149901	-0.0313977	-0.004043
	132	0.101317	0.0834106	-0.0209231	0.0978511	0.140999	-0.176363	0.0340337	-0.283771	-0.0355142	-0.0929672	-0.000905469	0.0742804	0.203115	-0.152599	0.145216	-0.0394676	0.00642067
	135	0.0430138	0.0834684	-0.035132	0.0903564	0.104859	-0.187708	0.0280473	-0.288873	-0.0297381	-0.066297	0.0433612	0.0989733	0.214781	-0.100898	0.0916196	-0.0226425	-0.0370641
	138	0.0910708	0.0760615	-0.0375148	0.0782188	0.145194	-0.194132	0.0389288	-0.284835	-0.0353231	-0.0751765	0.0378495	0.0703218	0.200833	-0.101935	0.226937	-0.0280269	-0.0305817
	141	0.0894823	0.0714006	-0.051553	0.0818805	0.106923	-0.20426	0.0217404	-0.282959	-0.0455402	-0.0703239	0.0423043	0.0620899	0.197504	-0.107366	0.109609	-0.0220168	-0.0417598
	144	0.12944	0.0929157	-0.0317373	0.0769643	0.110184	-0.206051	0.052178	-0.292436	-0.0588596	-0.0539794	0.0226429	0.0554788	0.185351	-0.110518	0.160405	-0.0347695	0.0251418
	147	0.137646	0.0733289	-0.0570781	0.0698688	0.121309	-0.229271	0.0466691	-0.308973	-0.0379086	-0.0684548	0.0215011	0.0398398	0.196442	-0.118763	0.153778	-0.00851911	0.0178203
	150	0.103018	0.0862696	-0.0594112	0.0581307	0.114576	-0.223105	0.0522131	-0.30297	-0.0271644	-0.0757517	0.0100915	-0.00345699	0.198183	-0.093367	0.16124	-0.0240397	0.0667965
	153	0.0854175	0.0744645	-0.0596307	0.0654592	0.118034	-0.243131	0.0269942	-0.281602	-0.0380581	-0.0793681	0.0104988	0.000789235	0.190388	-0.079169	0.156442	-0.0136122	0.0366039
	156	0.0840815	0.0827695	-0.0692736	0.0625533	0.116555	-0.188581	0.00772123	-0.301106	-0.0145389	-0.0908394	-0.0255796	0.00406924	0.150358	-0.0504369	0.15206	-0.0489751	0.0167956
	159	0.12032	0.0903748	-0.0572192	0.0617076	0.0804162	-0.191039	0.0200274	-0.293561	-0.0310533	-0.122147	-0.0325825	0.00241655	0.156403	-0.102601	0.103196	-0.0370257	0.0706486
	162	0.0985035	0.0967332	-0.0399139	0.0529513	0.0980845	-0.228322	0.00216104	-0.296924	-0.0249894	-0.107075	-0.0384318	0.00247545	0.130418	-0.120211	0.165865	-0.0381578	0.0319922
	165	0.100863	0.0982001	0.000656434	0.059753	0.106875	-0.217169	-0.0241122	-0.277156	-0.0196224	-0.1019	0.00356434	0.000320033	0.143715	-0.115785	0.17486	-0.0460324	0.0886957
	168	0.0717983	0.0920167	-0.0422721	0.0577815	0.112052	-0.199711	-0.0222675	-0.301092	-0.0563694	-0.114533	0.0169927	-0.000626252	0.13087	-0.0960725	0.107368	-0.0312901	0.0679793
	171	0.108305	0.0843618	-0.0556243	0.0500293	0.10718	-0.208274	-0.0260605	-0.306165	-0.0550616	-0.10999	0.045397	0.00166612	0.126392	-0.110537	0.19987	-0.0287601	0.0675211
	174	0.0942903	0.0823858	-0.00597296	0.041758	0.0996647	-0.214278	-0.0277613	-0.292413	-0.0364611	-0.106204	0.0499287	-0.00219861	0.114966	-0.134196	0.124181	-0.0326179	0.0508822
	177	0.0914985	0.0850943	-0.0217597	0.0436648	0.112941	-0.228186	0.00456316	-0.29132	-0.0494858	-0.0835211	0.0599056	0.00430206	0.138056	-0.169399	0.123914	-0.0229458	0.0227801
	180	0.0830705	0.0702419	-0.0295497	0.036897	0.0832067	-0.180702	-0.00670181	-0.29789	-0.051832	-0.0674163	0.0963601	-0.0345366	0.13197	-0.162449	0.143459	-0.0410459	0.0266904

## Sheet: Figure2C
Figure 2C
	Decay constant (s-1)
	NHDF
	0.0233748
	0.0192731
	0.0848113
	0.020564
	0.0320069
	0.0274969
	0.0270605
	0.0200237
	0.0185865
	0.0742726
	0.0355757
	0.0377637
	0.0126824
	0.0567182
	0.0331747
	0.0263536
	0.124748

## Sheet: Figure2F
Figure 2F
	Fluorescence versus time
	Time (s)	PM																				Actin
	0	1.21601	2.0411	1.37093	1.09509	0.604753	0.312192	0.276807	0.206549	0.570621	1.49981	1.42053	1.74986	0.689513	1.35915	1.35433	0.232641	1.13413	0.53636	0.653136	1.446	0.29201	0.288357	0.550539	0.0747529	0.490502	0.190198	0.385417	-0.0308214	0.59867	0.376633	0.973238	0.450242	0.205424	0.333756	0.108449	0.0326545	0.378939	0.532364	0.379142	0.341196
	3	0.818156	1.67862	0.960271	0.595424	0.634377	0.383557	0.269818	0.925947	0.539365	1.33946	1.37642	1.76907	0.535264	1.05801	1.4598	0.516538	1.85428	0.394658	0.643523	1.62595	0.314578	0.429937	0.560032	0.0956313	0.557779	0.233152	0.388521	-0.00159853	0.631991	0.579787	0.979549	0.642634	0.214613	0.505539	0.196824	0.195314	0.777882	0.363613	0.410352	0.532736
	6	0.60187	1.51377	0.834007	1.09456	0.71016	0.393275	0.174752	1.29954	0.532427	1.42638	1.43634	1.61351	0.419872	1.45684	1.3403	0.3843	2.13061	0.562663	0.609433	1.31974	0.290144	0.4995	0.481358	0.204137	0.631723	0.256914	0.34621	0.349914	0.649663	0.565216	0.914837	0.699259	0.180161	0.763484	0.301403	0.249832	0.838912	0.57629	0.42356	0.568151
	9	0.565264	1.33551	0.742173	1.18718	0.575098	0.367329	0.519698	1.1811	0.504834	1.31123	1.34244	1.56741	0.341778	1.82734	1.40409	0.451952	2.1279	0.768652	0.616013	1.263	0.354461	0.56809	0.561641	0.222488	0.635512	0.292267	0.433305	0.0978097	0.60748	0.627039	0.871751	0.671731	0.111897	0.847378	0.336234	0.306599	0.813764	0.759654	0.418844	0.462057
	12	0.425296	1.23174	0.704211	1.0256	0.657999	0.372621	0.70452	1.05388	0.280949	1.2086	1.14774	1.37436	0.136635	1.80824	1.44711	0.420901	2.11503	0.847753	0.465706	1.11888	0.295747	0.531777	0.530186	0.244439	0.5744	0.274408	0.437298	0.232706	0.667816	0.653193	0.931198	0.566826	0.100347	0.713181	0.371522	0.261843	0.847081	0.805515	0.405151	0.510252
	15	0.342792	1.09627	0.662102	0.901785	0.697621	0.336388	0.687939	0.939701	0.493594	1.13875	1.11674	1.02804	0.27519	1.66234	1.40007	0.424545	2.1285	0.796011	0.450143	1.05781	0.207211	0.546848	0.522577	0.233892	0.56991	0.297429	0.379852	0.170561	0.734424	0.646906	0.977562	0.508823	0.147569	0.611874	0.415886	0.257531	0.810982	0.783166	0.391236	0.390648
	18	0.267644	1.06089	0.615674	0.873998	0.607767	0.322773	0.65032	0.789391	0.590168	0.968097	1.03797	0.952739	0.451534	1.45271	1.27084	0.348081	1.67262	0.540374	0.485051	0.769906	0.229631	0.560912	0.468687	0.198855	0.560571	0.269702	0.359828	0.136748	0.802709	0.608728	0.941745	0.509136	0.114153	0.46414	0.463793	0.14658	0.925768	0.708546	0.3668	0.345943
	21	0.255284	0.967598	0.596412	0.778423	0.545224	0.338014	0.573424	0.799996	0.72431	0.960502	1.00906	0.890059	0.422803	1.30388	1.0855	0.346831	2.00115	0.51346	0.454891	0.632071	0.214202	0.570328	0.433465	0.20331	0.524556	0.298661	0.374874	0.0822443	0.809349	0.65856	0.875057	0.414816	0.129751	0.289188	0.494383	0.160147	0.940734	0.707615	0.382001	0.194937
	24	0.22016	0.977767	0.608525	0.807455	0.548441	0.28447	0.501483	0.704586	0.783555	0.877594	0.949069	0.889893	0.389599	1.2047	1.14335	0.351193	2.13094	0.461405	0.500142	0.430104	0.170607	0.518562	0.42693	0.192026	0.521605	0.287178	0.406773	0.066168	0.810044	0.686284	0.888409	0.383757	0.138989	0.132397	0.470327	0.150152	0.926143	0.662999	0.367785	0.24694
	27	0.186276	0.847805	0.526591	0.775014	0.569956	0.2983	0.442683	0.646398	0.716368	0.753729	0.88333	0.851598	0.278306	0.957255	1.21337	0.341769	2.09679	0.399354	0.506321	0.408295	0.17908	0.462015	0.381684	0.21437	0.519172	0.303545	0.399339	0.0524603	0.786134	0.613164	0.853777	0.417238	0.140886	0.0881998	0.489379	0.131298	0.883648	0.579628	0.374737	0.145505
	30	0.19076	0.884455	0.508605	0.751815	0.545717	0.305914	0.455731	0.514316	0.542578	0.735797	0.802276	0.783094	0.221318	0.777578	1.13938	0.24573	2.08817	0.335833	0.415978	0.269781	0.209383	0.476385	0.358251	0.187572	0.575003	0.287943	0.392506	0.0340494	0.748662	0.546742	0.731165	0.377151	0.136287	0.0324257	0.491517	0.0388005	0.747334	0.593519	0.286631	0.197224
	33	0.184948	0.780472	0.478084	0.714675	0.591121	0.31716	0.377105	0.495911	0.652335	0.639546	0.40127	0.746103	0.287914	0.702023	0.98	0.321195	2.1074	0.268017	0.219564	0.26764	0.241951	0.437082	0.34419	0.209191	0.521408	0.27564	0.36789	-0.144166	0.817338	0.483806	0.677476	0.29364	0.122867	0.0481054	0.497624	0.0436587	0.766897	0.481839	0.315927	0.116652
	36	0.188484	0.774353	0.484861	0.794402	0.606984	0.332364	0.324368	0.419344	0.551111	0.520216	0.363247	0.676174	0.285872	0.632501	1.01227	0.33777	2.03763	0.249221	0.162423	0.119469	0.191319	0.454181	0.315616	0.211935	0.499543	0.305172	0.380773	-0.0954488	0.821599	0.400121	0.84529	0.229162	0.110365	0.0181944	0.47222	0.0568796	0.719128	0.498121	0.334816	0.0214231
	39	0.212229	0.763218	0.45249	0.637651	0.558063	0.280221	0.232472	0.426864	0.682136	0.453372	0.44558	0.520559	0.269684	0.546677	1.02702	0.301244	1.85115	0.226996	0.177087	0.0122692	0.26422	0.389382	0.310707	0.165085	0.546182	0.308433	0.36987	-0.0791229	0.854888	0.327886	0.842903	0.175422	0.0986675	-0.00266675	0.486887	0.0867693	0.787196	0.53554	0.279596	0.0582697
	42	0.207832	0.675859	0.462802	0.441199	0.437524	0.227938	0.297975	0.360584	0.597253	0.390858	0.410108	0.440292	0.248658	0.535616	1.02742	0.225821	1.89398	0.160035	0.203302	0.00493241	0.289108	0.36427	0.316368	0.134726	0.529361	0.295654	0.341095	-0.0983143	0.835077	0.270837	0.842591	0.200516	0.0819074	0.0194992	0.47652	0.0333307	0.840135	0.520975	0.322819	0.0363978
	45	0.177933	0.690813	0.446866	0.429978	0.433106	0.22602	0.490837	0.32677	0.48172	0.272036	0.365887	0.403833	0.23289	0.486258	1.03894	0.245512	1.67675	0.162896	0.173391	0.112087	0.222572	0.323084	0.304793	0.121702	0.543087	0.254808	0.3206	-0.0836388	0.868615	0.191474	0.776819	0.23675	0.0648907	-0.0471363	0.454124	0.0461449	0.738737	0.496962	0.310433	0.0412648
	48	0.181172	0.533966	0.428949	0.401478	0.314949	0.217029	0.429947	0.273094	0.486094	0.149314	0.307606	0.369321	0.224786	0.446468	0.984698	0.219214	1.65483	0.148205	0.159302	-0.0178386	0.215661	0.309991	0.245887	0.104608	0.497786	0.25127	0.297396	-0.10185	0.865839	0.178851	0.818867	0.188093	0.0684682	-0.00922305	0.491911	0.0204923	0.81718	0.430862	0.349361	-0.0179702
	51	0.177972	0.528176	0.408478	0.377704	0.320654	0.219134	0.367654	0.258106	0.470623	0.047833	0.269861	0.331451	0.203735	0.468211	0.979023	0.193282	1.602	0.118319	0.178669	-0.0973101	0.213604	0.302629	0.272607	0.0994921	0.534831	0.252823	0.350631	-0.135611	0.858585	0.218149	0.798314	0.153655	0.0725376	-0.0423063	0.451938	-0.0253412	0.85265	0.449243	0.305957	-0.0118954
	54	0.177002	0.439354	0.411193	0.372471	0.340867	0.2148	0.312163	0.289287	0.457986	0.00383083	0.21003	0.309997	0.180128	0.400891	0.873784	0.18813	1.57494	0.141709	0.187278	-0.073032	0.176	0.270215	0.266995	0.109644	0.513226	0.264586	0.335207	-0.180827	0.842632	0.227097	0.794287	0.178467	0.0819758	0.0384707	0.496674	-0.0241138	0.819977	0.42903	0.324762	-0.0134268
	57	0.15622	0.298241	0.305077	0.321568	0.33674	0.211505	0.387322	0.21456	0.443124	0.0068684	0.18595	0.297461	0.16584	0.353934	0.828404	0.212549	1.66029	0.108573	0.154101	-0.172949	0.168234	0.20838	0.218343	0.111982	0.54973	0.271862	0.298786	-0.187332	0.858777	0.186095	0.711123	0.232101	0.0729256	-0.00763909	0.474772	0.0324869	0.76692	0.430309	0.337656	-0.0758045
	60	0.15279	0.415734	0.282045	0.324874	0.267034	0.219403	0.343731	0.159364	0.430669	0.00295896	0.158515	0.272791	0.131868	0.310988	0.879563	0.175377	1.60718	0.126249	0.174639	-0.0912559	0.139874	0.242011	0.240262	0.0995745	0.514329	0.276274	0.299794	-0.140642	0.82517	0.187863	0.689636	0.238116	0.0773749	-0.0528124	0.438452	0.0240797	0.810871	0.447059	0.315921	-0.223383
	63	0.11664	0.385588	0.27278	0.324872	0.235544	0.208234	0.364053	0.188919	0.416355	0.0184184	0.111734	0.264224	0.126721	0.322232	0.864869	0.167222	1.5573	0.143859	0.152333	-0.143896	0.105058	0.214082	0.207483	0.110227	0.585058	0.283298	0.281311	-0.135296	0.820609	0.166193	0.664702	0.215195	0.0757853	-0.0944308	0.44847	0.00348835	0.755265	0.429142	0.302755	-0.147929
	66	0.123405	0.389069	0.267694	0.330206	0.288655	0.233936	0.256711	0.185097	0.392454	-0.00803291	0.0882854	0.256035	0.130815	0.311375	0.88027	0.170271	1.53772	0.101118	0.183695	-0.153109	0.111636	0.16942	0.22036	0.10424	0.553944	0.28591	0.280355	-0.135052	0.816086	0.161078	0.654916	0.206614	0.075899	-0.147421	0.396466	-0.000969157	0.781356	0.441294	0.303314	-0.250617
	69	0.119118	0.352878	0.270737	0.318355	0.297297	0.224677	0.173805	0.149474	0.413227	-0.0685428	0.0409171	0.229136	0.1253	0.276678	0.869244	0.174696	1.51666	0.0117472	0.144907	-0.114715	0.135817	0.158008	0.205848	0.112063	0.538056	0.265062	0.320291	-0.0300387	0.806356	0.122745	0.660884	0.202408	0.0592424	-0.162127	0.391938	-0.0172082	0.750373	0.413982	0.2973	-0.226664
	72	0.115675	0.303276	0.244641	0.265426	0.292136	0.210087	0.281924	0.146106	0.391711	-0.0395839	0.0255069	0.222709	0.119518	0.205177	0.887971	0.176922	1.47685	0.0716907	0.154127	-0.111628	0.0828332	0.148657	0.204431	0.106499	0.546518	0.289604	0.296827	-0.0952178	0.80197	0.130283	0.628755	0.191725	0.0467788	-0.123077	0.395575	-0.0533007	0.721616	0.437424	0.251731	-0.197761
	75	0.0971884	0.31528	0.242738	0.214039	0.18789	0.183877	0.276705	0.0814547	0.373848	-0.0146315	0.013614	0.208519	0.100889	0.208709	0.839633	0.195107	1.42355	0.00680792	0.142309	-0.128532	0.115142	0.13744	0.230576	0.0987693	0.612336	0.285455	0.298518	-0.112185	0.806655	0.0664546	0.62635	0.208039	0.047471	-0.109798	0.374201	-0.0644069	0.68317	0.415998	0.275589	-0.256997
	78	0.100446	0.269118	0.22786	0.18741	0.203243	0.189879	0.28962	0.148379	0.37545	-0.0464153	0.0210301	0.185266	0.113945	0.215415	0.864128	0.190256	1.24404	-0.0587952	0.0850639	-0.176647	0.149017	0.134105	0.198093	0.109534	0.617112	0.308234	0.31973	-0.103621	0.802053	0.0736914	0.63655	0.148861	0.0504697	-0.106876	0.360943	-0.0634749	0.76057	0.478742	0.283202	-0.254946
	81	0.0948428	0.254105	0.19137	0.193984	0.185856	0.168435	0.298075	0.0999709	0.349797	-0.0636012	0.0345411	0.193078	0.118244	0.27633	0.822876	0.190943	1.20801	-0.102521	0.123618	-0.0820791	0.164677	0.137147	0.174029	0.139028	0.617626	0.292001	0.292438	-0.142221	0.800954	0.0773059	0.671097	0.113433	0.0538743	-0.0898735	0.369169	-0.0374647	0.764546	0.399784	0.29438	-0.211332
	84	0.0898342	0.239204	0.210041	0.213697	0.20703	0.160324	0.276552	0.118421	0.343115	-0.0532681	0.121489	0.141823	0.0999285	0.211899	0.717999	0.202161	1.29845	-0.044541	0.121941	-0.00879311	0.1701	0.133709	0.156423	0.0966156	0.643923	0.259343	0.32201	-0.161108	0.778359	0.0737938	0.711154	0.105848	0.0423888	-0.137022	0.358053	0.0014463	0.660739	0.466581	0.261089	-0.143643
	87	0.0937624	0.241654	0.188592	0.191825	0.18576	0.152946	0.23535	0.105854	0.350418	-0.0526665	-0.00626236	0.150223	0.0951652	0.248516	0.707103	0.217742	1.22005	-0.0793817	0.118355	-0.11022	0.156622	0.136886	0.13823	0.0317238	0.619157	0.248735	0.327355	-0.154146	0.786765	0.0929202	0.622103	0.110196	0.0547823	-0.0962863	0.346023	0.0151197	0.687095	0.471984	0.272485	-0.177106
	90	0.0752687	0.192307	0.16494	0.143	0.184462	0.152383	0.214207	0.0689538	0.317786	-0.0282996	-0.0132528	0.129102	0.0918707	0.260251	0.704407	0.223736	1.05141	-0.0924062	0.0708882	-0.0454313	0.165809	0.134258	0.181043	0.0835626	0.629452	0.231129	0.325985	-0.113769	0.784754	0.074627	0.777522	0.121369	0.0344699	-0.122629	0.317926	0.00386909	0.700855	0.476795	0.30696	-0.212204
	93	0.066418	0.174478	0.192418	0.152621	0.139201	0.139197	0.209844	0.0939364	0.337635	-0.0452393	-0.0347103	0.133289	0.0944689	0.195473	0.642735	0.192948	0.945032	-0.100286	0.0903192	-0.142231	0.145545	0.0990904	0.170598	0.0589052	0.678973	0.230321	0.329477	-0.11974	0.736097	0.117619	0.736767	0.0900933	0.0347037	-0.12889	0.310348	-0.0107976	0.67554	0.464638	0.265592	-0.281244
	96	0.0905665	0.122665	0.19596	0.159282	0.138403	0.132761	0.185179	0.093921	0.305972	-0.0688042	0.0282152	0.127362	0.0823862	0.237851	0.595624	0.221222	1.03795	-0.065026	0.0840377	-0.204126	0.176996	0.0899335	0.15187	0.0456003	0.655693	0.236629	0.299354	-0.156617	0.745629	0.104278	0.764394	0.0433781	0.0334262	-0.0877334	0.307969	-0.00868253	0.559692	0.459498	0.289387	-0.153962
	99	0.0922324	0.140471	0.181478	0.128687	0.092777	0.134434	0.166668	0.0543802	0.310467	-0.0416633	-0.00631267	0.127537	0.082808	0.217847	0.612273	0.182997	1.00324	-0.10209	0.025387	-0.178871	0.163101	0.113939	0.159371	0.0815427	0.59283	0.23411	0.291957	-0.0958654	0.73785	0.0939331	0.745903	0.0621158	0.0318191	-0.129955	0.266517	-0.0474159	0.510552	0.458765	0.298843	-0.15729
	102	0.0622979	0.145625	0.171127	0.134406	0.164251	0.118493	0.19198	0.0896209	0.31656	-0.0454472	-0.0115126	0.107518	0.0739852	0.207245	0.597306	0.191025	0.945218	-0.100003	0.0397093	-0.128062	0.138664	0.124964	0.15628	0.0895534	0.527784	0.212649	0.28764	-0.134626	0.740549	0.0910227	0.712033	0.047842	0.0306547	-0.133891	0.222228	-0.0781397	0.473264	0.49004	0.245039	-0.15377
	105	0.0613196	0.10301	0.0909979	0.122828	0.148161	0.104694	0.144521	0.0721166	0.305498	-0.0451993	0.0265032	0.0591508	0.0577168	0.254747	0.582152	0.180363	0.877251	-0.110751	0.0602673	-0.15403	0.130541	0.123376	0.117288	0.0714543	0.60783	0.229964	0.297988	-0.204764	0.73342	0.0932428	0.679046	0.0153073	0.0259549	-0.0794593	0.162809	-0.0739684	0.494157	0.51311	0.26586	-0.215128
	108	0.0645642	0.0987422	0.0976969	0.108011	0.172253	0.100399	0.114208	0.0405916	0.291544	-0.0191558	0.0367092	0.0977867	0.0691926	0.215414	0.580057	0.164466	0.830742	-0.0698619	0.0232539	-0.205156	0.159043	0.138368	0.134543	0.0649024	0.587682	0.227666	0.287858	-0.175845	0.726227	0.118733	0.670605	0.0364799	0.0427464	-0.100075	0.19611	-0.0833003	0.436526	0.538978	0.254375	-0.290194
	111	0.0639156	0.0805017	0.0824773	0.0945975	0.123713	0.108287	0.126005	0.0458212	0.272023	-0.0154471	0.0296606	0.09157	0.0591301	0.228753	0.596106	0.134063	0.712782	-0.0415542	0.015928	-0.155248	0.151628	0.132646	0.146906	0.0220736	0.540784	0.236092	0.295291	-0.117413	0.729277	0.0818409	0.732248	0.114725	0.0584384	-0.0898664	0.176891	-0.0685598	0.437786	0.582786	0.264966	-0.28084
	114	0.0625732	0.0671347	0.0775241	0.0853175	0.0944344	0.0983266	0.12484	0.00989827	0.257475	-0.0123829	-0.0679703	0.0893796	0.0594031	0.184711	0.454989	0.142356	0.760347	-0.0371244	-0.00155138	-0.21906	0.112028	0.107561	0.132239	0.0732659	0.564402	0.217636	0.294183	-0.163719	0.733562	0.0688207	0.765419	0.0987731	0.0478846	-0.0609317	0.160295	-0.0664604	0.416183	0.501473	0.245832	-0.289484
	117	0.0635968	0.033205	0.074457	0.1046	0.0634911	0.0783779	0.137116	0.0848966	0.243633	-0.0680119	-0.0268494	0.0764651	0.0569782	0.246702	0.421402	0.124657	0.7442	-0.0711555	0.0189695	-0.191978	0.131171	0.112276	0.143422	0.0508344	0.542832	0.246437	0.283263	-0.140631	0.71304	0.060921	0.744494	0.0884162	0.0447473	-0.0513732	0.146467	-0.0754515	0.331156	0.53296	0.261445	-0.24716
	120	0.0694949	0.0305017	0.0748071	0.0724928	0.0626457	0.0723552	0.148563	0.0676169	0.25995	-0.0256644	-0.0554347	0.102796	0.0503124	0.228684	0.414527	0.115893	0.646092	-0.102476	0.0304681	-0.219621	0.123066	0.0996382	0.145961	0.0313224	0.602677	0.235792	0.266132	-0.148784	0.731235	0.100193	0.752954	0.109861	0.0414852	-0.0116138	0.168911	-0.0402875	0.355658	0.506945	0.250914	-0.191912
	123	0.0569168	0.011713	0.0724129	0.0702448	0.0534023	0.0806435	0.129082	0.0596782	0.250059	-0.0317311	-0.0883684	0.106523	0.0509406	0.176552	0.409036	0.113965	0.559135	-0.10414	0.00354664	-0.123403	0.0944777	0.0894163	0.199122	0.014571	0.57473	0.228265	0.265045	-0.120869	0.710858	0.0573338	0.798562	0.0876653	0.0443684	-0.0627449	0.155164	-0.0757353	0.39711	0.475333	0.265196	-0.267323
	126	0.057296	0.0157305	0.062651	0.0740703	0.0614396	0.0568078	0.124583	0.0365368	0.23522	-0.0420316	-0.103189	0.108113	0.0548758	0.197709	0.393968	0.102146	0.575817	-0.100392	0.00143337	-0.180422	0.108455	0.107588	0.156426	0.0183155	0.562035	0.219303	0.240593	-0.0895583	0.712453	0.0620219	0.817793	0.138091	0.0531069	-0.00196747	0.153418	-0.0699918	0.387969	0.488266	0.237788	-0.0314455
	129	0.0580225	0.0332175	0.050729	0.0726483	0.0285007	0.0616972	0.137021	0.0636263	0.256875	-0.0509372	-0.0383214	0.123064	0.0527422	0.230042	0.402267	0.10945	0.570368	-0.0887175	0.00590833	-0.201693	0.105548	0.0980007	0.181269	0.0354716	0.574004	0.198529	0.253881	-0.0366628	0.733942	0.0401651	0.80021	0.152368	0.051044	0.0145476	0.153459	-0.0108891	0.437206	0.448424	0.253214	-0.0546394
	132	0.0579313	-0.0121039	0.0557184	0.0695205	0.0228526	0.0466869	0.103573	0.0487158	0.240908	-0.00501208	-0.046886	0.12343	0.0445879	0.206579	0.397643	0.0813465	0.519089	-0.0419975	-0.0194372	-0.0933513	0.044299	0.0955014	0.17264	0.0547533	0.530146	0.212519	0.277684	-0.143891	0.711442	0.0221232	0.797163	0.175288	0.0480492	0.0265321	0.173653	-0.0486468	0.469297	0.485228	0.233083	-0.0527294
	135	0.0341905	0.0137107	0.0569478	0.0434178	0.0562267	0.0453819	0.0983202	0.0883687	0.256079	-0.00551765	-0.0847687	0.130764	0.049128	0.23482	0.383034	0.110724	0.524431	-0.040866	0.036123	-0.139374	0.0348133	0.127747	0.1425	0.0146795	0.536179	0.224592	0.252036	-0.155361	0.710589	0.0549799	0.768865	0.173704	0.0540395	0.0500115	0.129074	-0.0239614	0.450339	0.46434	0.24242	-0.0267556
	138	0.0254605	0.00610213	0.0372953	0.0210367	-0.013712	0.0432745	0.104939	0.0734904	0.228754	-0.0600153	-0.0425782	0.141504	0.0440844	0.190477	0.360869	0.106039	0.487609	-0.0484628	0.0616307	-0.0463528	0.0608922	0.144101	0.149148	0.0786034	0.56383	0.190983	0.262088	-0.128152	0.69231	0.0440762	0.748355	0.200912	0.0446972	0.0873308	0.113151	0.00311602	0.430643	0.424874	0.250892	-0.10177
	141	0.0545907	0.00903265	0.045692	0.0163404	-0.00534597	0.0437898	0.104502	0.0933916	0.206745	-0.0461852	-0.094725	0.151536	0.0328163	0.203924	0.364202	0.0981548	0.379747	-0.0373452	-0.0187531	-0.021196	0.0748633	0.162761	0.153594	-0.0109209	0.532612	0.164485	0.246023	-0.14228	0.699681	0.0854782	0.73415	0.146109	0.0335433	0.0922107	0.0846995	-0.0180289	0.383528	0.405294	0.254276	-0.146033
	144	0.0433132	0.0205932	0.0356649	-0.00276907	-0.0150608	0.0433262	0.122098	0.0830701	0.189192	-0.0614833	-0.135558	0.145446	0.047073	0.256102	0.384373	0.116802	0.444837	-0.0809355	0.00772264	-0.103937	0.0372113	0.144791	0.109063	0.0207963	0.524353	0.177767	0.25301	-0.201261	0.67413	0.0994923	0.745887	0.146625	0.0450461	0.0896784	0.0960989	0.0172096	0.369875	0.337107	0.259143	-0.115252
	147	0.0999587	0.0158683	0.033508	-0.00713669	0.00884532	0.0142542	0.107263	0.0960961	0.177258	-0.0207121	-0.129843	0.144192	0.0411174	0.231153	0.358523	0.0968587	0.375945	-0.0682086	-0.0126972	-0.149772	0.116178	0.132475	0.148045	0.0280646	0.523566	0.17954	0.284641	-0.128518	0.649557	0.109855	0.705521	0.183355	0.0324254	0.0803718	0.0927307	0.0021291	0.337699	0.362199	0.235997	-0.14097
	150	0.0837392	0.0121433	0.0247578	-0.024847	0.0600137	0.0175726	0.0860139	0.06911	0.180275	-0.0389755	-0.103982	0.162646	0.0282682	0.237997	0.343667	0.11765	0.339192	-0.0436111	0.0249805	-0.186637	0.047123	0.166931	0.152118	0.0300945	0.435386	0.174683	0.286427	-0.15837	0.655633	0.0636329	0.700959	0.170581	0.0254487	0.152641	0.120423	0.034514	0.287824	0.446988	0.254253	-0.0611452
	153	0.102622	0.00142839	0.00768719	-0.0248995	0.0273552	0.0134318	0.0950856	0.0804204	0.173628	-0.0202928	-0.062933	0.13852	0.033726	0.235605	0.314596	0.0887078	0.343507	-0.027232	0.00614133	-0.146581	-0.0259226	0.204446	0.139047	0.0702943	0.408372	0.149718	0.27045	-0.138104	0.627358	0.0805896	0.708548	0.161182	0.0376421	0.139126	0.110575	0.0445277	0.300608	0.426555	0.278166	-0.175954
	156	0.0716365	-0.0161499	0.0241421	-0.0136207	-0.0190626	0.0201682	0.0793381	0.050151	0.177927	-0.0169439	-0.074635	0.130968	0.0326258	0.270222	0.229302	0.100456	0.332024	-0.0104106	-0.0412409	-0.144531	0.0161727	0.187409	0.153567	0.0316094	0.376828	0.104545	0.233546	-0.132473	0.621945	0.0671906	0.708943	0.162077	0.026109	0.107707	0.0714717	0.00990168	0.308149	0.458862	0.221907	-0.225771
	159	0.0602317	-0.0102803	0.0116262	-0.013764	0.0503226	0.00330981	0.0933235	0.0209013	0.173307	-0.0500181	-0.0606171	0.148972	0.0328609	0.250754	0.240042	0.117937	0.320262	-0.0123325	-0.0355655	-0.108564	-0.00186913	0.176151	0.148175	0.0494857	0.384395	0.0948655	0.259614	-0.13004	0.597257	0.0858506	0.683839	0.169522	0.0246591	0.0892716	0.0612336	0.0811836	0.314967	0.394805	0.238793	-0.154456
	162	0.0396923	-0.0101455	0.0138378	0.0243562	-0.00410788	-0.0129627	0.0993121	-0.0125272	0.172913	-0.0315079	-0.0479833	0.127272	0.0361019	0.236603	0.204068	0.100255	0.326431	-0.0622973	0.0176415	-0.0101489	0.0101414	0.19053	0.134581	0.0657387	0.463079	0.108852	0.246977	-0.145019	0.598966	0.0914024	0.698316	0.15662	0.0193544	0.0647072	0.0618059	0.0697434	0.324492	0.422167	0.222437	-0.193933
	165	0.0436222	0.0149969	-0.0133128	-0.0239821	-0.0289914	-0.0252265	0.0843428	-0.0108488	0.153825	-0.01682	-0.0694335	0.147054	0.0274769	0.235251	0.197455	0.115256	0.311609	-0.0254806	0.0215322	-0.140168	0.0302363	0.186533	0.174378	0.0841556	0.433137	0.0968489	0.240736	-0.105066	0.613035	0.0970686	0.680033	0.144905	0.0212454	0.0589738	0.0679609	0.0598228	0.308727	0.422962	0.22593	-0.0710244
	168	0.0636901	0.00333664	0.00835022	-0.00457815	-0.0602213	-0.0104396	0.0888532	0.0406145	0.156617	-0.00250614	-0.0805917	0.158533	0.0309925	0.290297	0.238338	0.104668	0.328848	-0.0301997	-0.0273731	-0.128957	0.0794476	0.163138	0.1698	0.0528708	0.466279	0.0897362	0.257325	-0.137232	0.612473	0.062	0.688364	0.177411	0.00457541	0.0127641	0.0764957	0.0764401	0.313612	0.429664	0.221287	-0.103867
	171	0.0425985	0.00687872	-0.00362074	-0.0300047	-0.0462027	-0.0031831	0.0896769	-0.0243334	0.159558	-0.0404106	-0.0660344	0.135617	0.0184873	0.183269	0.182952	0.0960819	0.288865	-0.037176	-0.0309154	-0.05265	0.0969029	0.17367	0.167923	0.0923521	0.406514	0.111587	0.247022	-0.0210004	0.594963	0.0674393	0.648273	0.140198	0.004059	-0.00841035	0.0807513	0.115185	0.333146	0.393171	0.244208	-0.0706662
	174	0.0605024	0.00602137	0.00562827	-0.0163311	-0.0175211	-0.00948129	0.0745682	0.0209945	0.152048	-0.0302725	-0.0867766	0.116295	0.0236074	0.237178	0.177688	0.0885897	0.230344	-0.0124965	0.0407778	-0.073374	0.0734152	0.153146	0.177032	0.107433	0.491081	0.119356	0.24034	0.0162618	0.608059	0.0748656	0.675893	0.142471	0.00813143	-0.0169331	0.0861968	0.139822	0.313462	0.42565	0.223625	-0.0802399
	177	0.0555668	0.0143636	0.00924867	-0.0336131	-0.0320886	-0.0269506	0.0913234	0.0571617	0.161747	-0.0803437	-0.0680714	0.129523	0.0239085	0.206236	0.186578	0.0908076	0.242105	0.0622635	0.0371508	-0.110125	0.0167615	0.127164	0.202349	0.0498806	0.448828	0.141637	0.217132	-0.0733638	0.60622	0.0753654	0.661592	0.200896	0.00172552	-0.00744181	0.0572162	0.0987949	0.41868	0.455995	0.226241	-0.13664
	180	0.0506651	0.0276736	0.0177296	-0.0110179	-0.024271	-0.0134656	0.0808062	0.0981976	0.15263	-0.0443125	-0.0673968	0.140942	0.0280132	0.1876	0.175043	0.0726284	0.226566	0.103959	0.0291279	-0.164124	0.0188814	0.113296	0.197653	0.0924286	0.441959	0.152717	0.23692	-0.067848	0.557166	0.0670779	0.664979	0.245829	0.00616119	0.00350821	0.0616583	0.111409	0.348015	0.504019	0.195081	-0.155418

## Sheet: Figure2G
Figure 2G
	Membrane/Actin maximum intensity time
	PM max int	ACG max int
	0	9
	0	21
	0	9
	9	12
	6	9
	6	39
	12	12
	6	6
	24	45
	0	24
	6	3
	3	6
	0	3
	9	9
	3	33
	3	9
	24	21
	12	12
	0	6
	3	6

## Sheet: Figure2I
Figure 2I
	Fluorescence versus time
	Time (s)	PM														Ezrin
	0	0.95602	1.11061	1.17286	0.603778	1.18235	1.03431	0.493433	0.683337	2.38196	0.388052	1.23796	0.794261	1.16738	0.793689	0.270508	0.329271	0.195961	0.296978	0.230261	0.251656	0.149664	0.175073	0.591664	0.0172384	0.148632	0.4429	0.149599	0.0411802
	3	0.590196	1.26822	0.463895	0.422688	0.558641	0.835707	0.430866	0.215305	2.02447	0.605552	1.17377	0.349815	0.929405	0.9097	0.284418	0.622861	0.177209	0.299031	0.384032	0.262137	0.173345	0.167382	0.855897	0.206718	0.27948	0.45343	0.182325	0.0893595
	6	0.684655	0.849576	0.722273	0.441386	0.724274	0.559421	0.345099	0.164037	1.52245	0.5983	1.04315	0.584096	0.813151	0.804542	0.341964	0.677014	0.344045	0.340819	0.517132	0.291006	0.211046	0.177364	0.892003	0.251818	0.331266	0.65511	0.224586	0.172783
	9	0.737645	0.789908	0.771329	0.479078	0.642055	0.497269	0.260003	0.12223	1.09795	0.520518	0.861613	0.579309	0.663772	0.757591	0.362195	0.807104	0.456803	0.347069	0.500254	0.30349	0.222699	0.150896	1.07039	0.342765	0.363612	0.690111	0.255196	0.224833
	12	0.73772	0.70472	0.812597	0.422799	0.440922	0.36933	0.205138	0.124169	0.923648	0.434379	0.427325	0.454349	0.488536	0.690524	0.435734	0.876225	0.411284	0.358388	0.441003	0.27036	0.193184	0.152191	1.12157	0.391848	0.396901	0.657482	0.225589	0.264679
	15	0.722818	0.629964	0.532886	0.402174	0.419732	0.246077	0.184944	0.105819	0.684528	0.39221	0.55048	0.414033	0.489453	0.645114	0.441578	0.94797	0.44881	0.369977	0.444998	0.293703	0.22418	0.157897	1.16071	0.396765	0.483523	0.690558	0.234549	0.307493
	18	0.686971	0.543293	0.775816	0.430774	0.292617	0.229694	0.196397	0.119401	0.564208	0.370293	0.429633	0.332824	0.354341	0.614653	0.468764	0.925025	0.539149	0.397513	0.420947	0.343002	0.213006	0.125248	1.16412	0.450184	0.461455	0.666487	0.202702	0.342661
	21	0.666256	0.527843	0.749161	0.450764	0.300254	0.188421	0.189918	0.112566	0.446963	0.343238	0.370271	0.326299	0.42753	0.515803	0.448069	0.940523	0.528417	0.402219	0.400683	0.330523	0.182034	0.147795	1.16107	0.43291	0.436381	0.705616	0.251985	0.388222
	24	0.597547	0.527836	0.637913	0.445051	0.257663	0.108517	0.187236	0.101374	0.37404	0.260678	0.297094	0.330839	0.413056	0.509152	0.478791	1.01813	0.574674	0.379712	0.440559	0.308799	0.196138	0.134899	1.14782	0.414649	0.457125	0.737584	0.275389	0.435731
	27	0.5573	0.469596	0.611017	0.448492	0.204099	0.0830603	0.177954	0.0811082	0.324871	0.227599	0.293099	0.308359	0.413681	0.508111	0.469734	0.950586	0.590733	0.387505	0.41109	0.30073	0.166673	0.139126	1.07415	0.383591	0.467907	0.731402	0.285969	0.422514
	30	0.455727	0.471104	0.558156	0.370657	0.217366	0.0740868	0.128597	0.0937033	0.294855	0.188001	0.29725	0.309359	0.398393	0.475714	0.447205	0.993059	0.584856	0.40785	0.414844	0.2624	0.214638	0.143773	1.06601	0.341513	0.479335	0.748049	0.308407	0.417991
	33	0.483263	0.410146	0.5697	0.384387	0.158245	0.0734499	0.162743	0.081255	0.306172	0.166015	0.26592	0.325284	0.330366	0.448545	0.46752	0.89093	0.590406	0.394867	0.452871	0.24073	0.206996	0.103907	1.03505	0.338275	0.448017	0.802932	0.303716	0.429044
	36	0.458178	0.397374	0.581594	0.361708	0.132806	0.0635183	0.128658	0.0768771	0.291433	0.144989	0.203251	0.288584	0.335325	0.427706	0.460439	0.887406	0.658452	0.404599	0.392731	0.264338	0.202341	0.0824815	1.00885	0.319585	0.416254	0.833935	0.287971	0.407668
	39	0.439665	0.381284	0.539755	0.380639	0.136636	0.0470504	0.107068	0.0811844	0.277842	0.149952	0.190532	0.269007	0.295434	0.400853	0.491396	0.860247	0.618055	0.396284	0.402939	0.20221	0.177107	0.0736787	0.934447	0.354685	0.411624	0.847934	0.289762	0.395766
	42	0.413664	0.33125	0.525139	0.292214	0.15374	0.0325206	0.150784	0.0687699	0.215159	0.135519	0.205003	0.264629	0.270295	0.370062	0.488986	0.855806	0.564221	0.342117	0.362157	0.20616	0.154294	0.0943347	0.856192	0.31408	0.378062	0.866665	0.243536	0.400874
	45	0.364549	0.325003	0.40818	0.284416	0.145044	0.0474676	0.118751	0.0597305	0.221572	0.086908	0.185088	0.233594	0.254388	0.307142	0.495686	0.803813	0.4841	0.362165	0.386359	0.17603	0.185857	0.0650121	0.870265	0.235768	0.39264	0.782241	0.259722	0.398173
	48	0.328198	0.313927	0.377262	0.272656	0.146849	0.0336868	0.0824652	0.0620519	0.181493	0.0696157	0.182924	0.256275	0.26793	0.278244	0.48556	0.703938	0.499168	0.372649	0.349602	0.186395	0.189119	0.0933739	0.881761	0.256683	0.376811	0.878154	0.241416	0.389812
	51	0.308975	0.233731	0.334131	0.287877	0.134074	0.0169348	0.133186	0.0549057	0.20602	0.0543331	0.150624	0.279237	0.266647	0.258557	0.485047	0.648174	0.538785	0.367774	0.303659	0.151418	0.19696	0.10491	0.848647	0.234592	0.324359	0.869521	0.23498	0.379375
	54	0.319532	0.220023	0.369599	0.271856	0.134048	0.0147661	0.102906	0.061018	0.196131	0.0413847	0.148211	0.237598	0.261168	0.228275	0.462154	0.652235	0.519001	0.336082	0.332725	0.151137	0.178527	0.104073	0.823531	0.175655	0.31106	0.86548	0.237713	0.371091
	57	0.309622	0.225088	0.312532	0.258421	0.131112	0.0240044	0.116376	0.0593744	0.162279	0.033282	0.158517	0.250821	0.241878	0.231361	0.478264	0.515208	0.493972	0.335461	0.314217	0.134089	0.195769	0.0697576	0.798651	0.191848	0.265805	0.878678	0.214295	0.368856
	60	0.262387	0.152705	0.303432	0.248308	0.125194	0.0134021	0.0800623	0.0550414	0.168404	0.0392352	0.138515	0.254101	0.207687	0.219012	0.469362	0.55206	0.440056	0.306167	0.316176	0.146252	0.182939	0.0842138	0.767991	0.168143	0.24881	0.902254	0.181052	0.353505
	63	0.262031	0.148055	0.30164	0.236427	0.13565	0.00342444	0.0800428	0.0521562	0.156773	0.0398577	0.119796	0.247191	0.195098	0.199936	0.461268	0.440992	0.489454	0.289555	0.311082	0.118301	0.147692	0.0813905	0.735365	0.130579	0.220471	0.882979	0.168331	0.296104
	66	0.236471	0.112405	0.328601	0.193284	0.136476	0.0180724	0.0718629	0.0363572	0.14524	0.0109446	0.116172	0.251213	0.196618	0.19789	0.466622	0.435281	0.439277	0.287443	0.308641	0.0926088	0.120746	0.0954009	0.680306	0.123567	0.213019	0.891786	0.132088	0.292854
	69	0.241247	0.143304	0.305768	0.193591	0.107193	0.0133217	0.0491622	0.0428185	0.125402	-0.0113344	0.125379	0.242913	0.204376	0.196656	0.469003	0.395478	0.460473	0.267998	0.258969	0.102639	0.113006	0.0796977	0.6196	0.120408	0.19634	0.875014	0.146822	0.286741
	72	0.245197	0.140085	0.322412	0.18661	0.0785188	0.00420573	0.0536707	0.049471	0.150565	-0.0143797	0.116175	0.233172	0.197608	0.181442	0.468713	0.326954	0.454367	0.28384	0.246296	0.0850956	0.0947976	0.0644886	0.537706	0.0959371	0.172272	0.823737	0.122889	0.282279
	75	0.252691	0.103783	0.313122	0.183449	0.145065	0.0166701	0.0234609	0.0325394	0.103205	0.0064602	0.11346	0.229205	0.185336	0.175577	0.459876	0.333078	0.337697	0.268257	0.193731	0.111941	0.120021	0.0468447	0.557778	0.0425195	0.170508	0.820049	0.111498	0.25702
	78	0.236552	0.0611177	0.219747	0.173413	0.129572	0.0138775	0.0198387	0.0382997	0.115722	-0.0123828	0.105272	0.216131	0.157375	0.160506	0.45988	0.30276	0.347059	0.23529	0.201148	0.0886221	0.120325	0.0688825	0.506259	0.0464204	0.161945	0.789705	0.115824	0.258712
	81	0.221795	0.0858479	0.281523	0.155177	0.117096	-0.0051737	0.0351043	0.0506261	0.144003	-0.0301423	0.0788497	0.211933	0.15916	0.133491	0.443343	0.25738	0.40037	0.241672	0.187439	0.0892438	0.106535	0.0571655	0.509755	0.0399707	0.182824	0.75359	0.105101	0.231164
	84	0.222899	0.0850682	0.241917	0.148597	0.15798	-0.00837926	0.0308803	0.0259623	0.0976591	-0.00702084	0.0785562	0.154104	0.142017	0.146272	0.455231	0.225385	0.356868	0.235755	0.162355	0.0896168	0.0966886	0.0599043	0.500116	-0.00564257	0.142519	0.706146	0.100643	0.229331
	87	0.198748	0.117511	0.25317	0.14537	0.164916	-0.0196142	0.0215613	0.021639	0.127939	-0.00367369	0.079847	0.160967	0.143625	0.124663	0.438941	0.188735	0.329479	0.213165	0.227978	0.0756815	0.0998053	0.0546493	0.440598	-0.00552241	0.149462	0.715072	0.0812317	0.199612
	90	0.279125	0.109447	0.245042	0.135703	0.153012	-0.0328926	0.0416994	0.0574941	0.122818	-0.0411401	0.0674075	0.158327	0.147017	0.122163	0.472411	0.175852	0.289317	0.198536	0.184139	0.0807913	0.103021	0.0464523	0.44127	0.000438858	0.137566	0.701384	0.0657668	0.199939
	93	0.253803	0.104809	0.22601	0.139191	0.164409	-0.0218421	0.0248462	0.049803	0.117303	-0.01733	0.0716175	0.15577	0.140213	0.11426	0.470667	0.16561	0.306634	0.183559	0.146764	0.0455385	0.103433	0.044169	0.43531	0.0399942	0.0813991	0.688805	0.0330081	0.200979
	96	0.230537	0.113666	0.182334	0.127983	0.132342	-0.0232877	0.0129522	0.0236022	0.095097	0.00578338	0.0859958	0.171791	0.125372	0.0920309	0.454344	0.148265	0.247658	0.176353	0.151205	0.0926765	0.105567	0.0524895	0.41616	0.00719042	0.0665361	0.683308	0.0252765	0.179525
	99	0.218578	0.119327	0.157813	0.102929	0.145627	-0.0474652	0.0151988	0.0216062	0.0878287	-0.0469538	0.0715987	0.143724	0.143339	0.104976	0.466185	0.0923312	0.202705	0.165495	0.117655	0.0614932	0.070223	0.0648957	0.392994	-0.00583458	0.0746318	0.616477	0.0237119	0.144362
	102	0.199193	0.0886315	0.186503	0.0946449	0.143649	-0.034214	0.0406961	0.0382617	0.0890522	-0.0505659	0.0533917	0.162044	0.116573	0.0959292	0.431887	0.0285447	0.188072	0.142583	0.0863653	0.0678489	0.092173	0.0469902	0.43667	-0.0271017	0.0746764	0.607115	0.00612498	0.140156
	105	0.16442	0.0789387	0.182836	0.101281	0.130218	-0.0389527	0.0197631	0.0348437	0.0996843	-0.0722819	0.0488214	0.123766	0.116487	0.104906	0.416303	0.0360064	0.138544	0.1443	0.110128	0.0879809	0.0674648	0.0233057	0.413431	-0.0319772	0.0799993	0.548127	-0.0085645	0.136593
	108	0.163888	0.0975572	0.134033	0.0831467	0.135706	-0.0412987	0.0497332	0.0379592	0.0881414	-0.0277328	0.0430384	0.116839	0.105783	0.0975987	0.398541	0.0280919	0.184274	0.109866	0.0890227	0.0869768	0.0788426	0.0408536	0.413365	-0.0623428	0.0608672	0.548584	-0.00753255	0.150381
	111	0.179448	0.0823188	0.123473	0.0925745	0.113329	-0.0287375	0.0219155	0.035126	0.0993123	-0.0719257	0.0507897	0.102839	0.102714	0.0762582	0.405143	0.0818872	0.104082	0.118898	0.0620895	0.0977252	0.0775559	0.0257165	0.380467	-0.0756046	0.0594686	0.526271	-0.00237148	0.162329
	114	0.144261	0.0905069	0.102285	0.107922	0.13838	-0.0346707	0.0353053	0.0231729	0.103163	-0.0579753	0.0433434	0.0870644	0.0849846	0.0726957	0.402663	0.0596726	0.124857	0.0996775	0.0502454	0.116529	0.0774864	0.0270053	0.351374	-0.0995465	0.0595949	0.515522	0.0275232	0.155727
	117	0.145141	0.0990631	0.0955793	0.0825979	0.126594	-0.0360008	0.0332231	0.0419016	0.0599661	-0.0198877	0.0583748	0.0807659	0.0591444	0.0791965	0.389923	0.0359486	0.124884	0.0874801	0.0416524	0.0807785	0.0763927	0.0159291	0.405664	-0.0717502	0.0392523	0.481316	0.0144788	0.117132
	120	0.158323	0.0949227	0.105428	0.0990671	0.0935633	-0.0307984	0.0123319	0.0585827	0.0631817	-0.0352708	0.0600333	0.0899961	0.067968	0.0482722	0.386524	0.0816328	0.0899373	0.0962018	0.0483258	0.107519	0.0588179	0.01713	0.38775	-0.0852709	0.0490342	0.443739	-0.0063836	0.0921253
	123	0.130164	0.0997093	0.087986	0.0937254	0.109338	-0.0261929	0.0229119	0.0480099	0.00255717	-0.0110822	0.0371634	0.0926288	0.059577	0.0365442	0.414589	0.0434548	0.0840267	0.108371	0.0637039	0.0953681	0.062874	0.0517744	0.394551	-0.120188	0.0284328	0.400742	-0.0228011	0.0791295
	126	0.156918	0.0820695	0.118853	0.095068	0.111884	-0.0292207	0.0224739	0.0454516	0.0430019	-0.0167195	0.0485368	0.0689348	0.0606923	0.0377623	0.40573	0.0158184	0.115174	0.0750211	0.0971894	0.0825343	0.0625766	0.0559428	0.34887	-0.106467	0.0138959	0.402628	-0.0149484	0.0980021
	129	0.138806	0.122541	0.0847178	0.0848469	0.120299	-0.0270679	0.0325849	0.0263746	0.031108	-0.00470099	0.0467304	0.070921	0.0765136	0.0285163	0.380192	0.0239811	0.0797485	0.0907769	0.105149	0.0902113	0.0528797	0.0239297	0.356757	-0.121858	0.0129854	0.355865	-0.0213561	0.0857989
	132	0.0966848	0.116319	0.108636	0.0863056	0.107778	-0.0278877	0.0277201	0.0680662	0.0247687	-0.00465584	0.0588093	0.0773267	0.0672301	0.0386087	0.33616	0.0159702	0.0762149	0.0926114	0.131142	0.0940959	0.0452491	0.0317832	0.408126	-0.113587	0.0474736	0.364811	-0.0190965	0.110497
	135	0.129916	0.0960364	0.0916275	0.0756045	0.102858	-0.0264152	0.0391049	0.0489091	0.0495443	-0.0289577	0.0526169	0.0802654	0.0704858	0.0474402	0.368848	-0.0270475	0.0946229	0.0907491	0.0838139	0.0708713	0.0371164	0.0348773	0.379101	-0.178607	0.0334401	0.355084	-0.00762083	0.0967517
	138	0.100972	0.095112	0.0858909	0.0732354	0.126116	-0.023227	0.0326417	0.0536707	0.0483261	-0.0112221	0.0655166	0.0757145	0.0515222	0.0321984	0.356209	-0.0165825	0.0852672	0.0715206	0.0625436	0.0724614	0.0568812	0.0180122	0.33706	-0.15119	0.0459191	0.360675	-0.0135274	0.0940473
	141	0.101274	0.103653	0.101672	0.0679852	0.109993	-0.0120144	0.0252944	0.024798	0.0271766	0.0114732	0.0670376	0.0400543	0.047416	0.0170207	0.358756	-0.0144014	0.0485074	0.0831309	0.0720068	0.0768382	0.0562557	0.00735854	0.348881	-0.163332	0.0154608	0.322003	-0.0133912	0.0852939
	144	0.100049	0.108423	0.13829	0.0576485	0.071054	-0.0265162	0.0444345	0.0198967	0.0610091	0.0200444	0.0738721	0.0573982	0.0375882	0.0189016	0.356055	0.00965506	0.0293988	0.0682689	0.102294	0.0796829	0.0356137	0.01359	0.306031	-0.174693	0.0338084	0.301463	-0.01226	0.0654664
	147	0.116675	0.1078	0.0815764	0.0639289	0.103642	-0.0301608	0.0411405	-0.00395077	0.0305854	-0.01548	0.0666647	0.0280744	0.0403508	0.000435818	0.343393	0.0231083	0.0355052	0.0627099	0.0792029	0.0763982	0.0620708	0.0447021	0.333503	-0.182429	0.0256457	0.29833	-0.0298918	0.0610691
	150	0.103069	0.0626515	0.0973106	0.0750526	0.0708119	-0.0247714	0.02245	0.0241389	0.0187763	-0.00966883	0.0422546	0.0360242	0.0293723	0.00955478	0.326308	0.0367141	0.0274143	0.0533704	0.0773813	0.0709987	0.0589601	0.0321054	0.328415	-0.162878	0.0262105	0.296561	-0.013428	0.0449681
	153	0.0701389	0.133699	0.0929285	0.070226	0.127924	-0.018159	0.0258334	0.0251831	0.04202	0.0138717	0.0684537	0.0429324	0.0323172	-0.0351771	0.321198	0.0323293	0.00636832	0.0673715	0.115333	0.0461762	0.0528484	0.0196085	0.270566	-0.149451	-0.00332696	0.256219	-0.00653696	0.0362245
	156	0.0809181	0.0623235	0.0952649	0.0703007	0.0741824	-0.0252213	0.0122677	0.00509332	0.0555775	0.0254853	0.0714361	0.0238088	0.0248478	0.00294416	0.321204	0.046669	0.00175347	0.0589823	0.124859	0.0671911	0.0407095	0.0331887	0.300253	-0.200806	-0.000961953	0.261102	-0.0225757	0.0106726
	159	0.0774372	0.0882496	0.0642956	0.0659543	0.132065	-0.0191458	0.0309865	0.0196902	0.00251933	0.00848733	0.0867249	0.0139238	0.0288369	-0.00135321	0.305208	0.0255099	-0.0113049	0.0526815	0.0862442	0.0563329	0.0382949	0.016017	0.330592	-0.208479	-0.00373471	0.259834	-0.0233673	-0.018588
	162	0.0677434	0.0602965	0.0281686	0.0556355	0.115924	-0.0225428	0.0172661	0.0201961	0.0312762	-0.0039019	0.0844564	0.0074001	0.0424861	0.0161824	0.287687	0.0787242	0.0162633	0.0643506	0.0882918	0.0433024	0.0420444	0.0384605	0.285825	-0.200201	-0.0217941	0.263337	-0.0293311	-0.0126273
	165	0.0766853	0.034513	0.0968632	0.0563948	0.101037	-0.0174157	0.0525724	0.000976657	0.0130355	0.0176811	0.0751334	0.0181947	0.0446909	-0.00745652	0.272413	-0.00309159	-0.00527788	0.0453862	0.0790445	0.0370911	0.0210143	0.0408563	0.290263	-0.224108	-0.0110537	0.284583	-0.0294239	-0.0128968
	168	0.0735089	0.0691451	0.0638529	0.0626717	0.0703542	-0.00455241	0.0157439	0.00933945	0.026328	0.00539648	0.0688497	0.0283865	0.0248965	-0.00693991	0.278717	0.000947064	-0.010567	0.0577555	0.108966	0.0260058	0.04686	0.0189769	0.270182	-0.203294	0.0112097	0.269433	-0.0602271	-0.0342315
	171	0.0749777	0.0978281	0.0812744	0.0534237	0.0677257	-0.0180555	0.0358208	0.0101616	0.0237236	0.00130208	0.0888753	-7.90496e-05	0.0301354	0.00921522	0.267283	0.0168199	-0.00157571	0.055324	0.1143	0.029012	0.0320693	0.0264116	0.27695	-0.182974	-0.00100606	0.251144	-0.0725736	-0.026891
	174	0.0657445	0.0360916	0.0475401	0.0524491	0.120336	-0.0257314	0.0284573	0.0135116	0.0101467	0.00815941	0.0714416	0.0220783	0.0299436	0.00793362	0.269422	-0.0302918	-0.0106072	0.0554047	0.103949	0.0197845	0.0130482	0.0333596	0.292058	-0.191298	-0.000772728	0.207765	-0.0651059	-0.0536522
	177	0.076314	0.0473537	0.0754619	0.0544299	0.0894641	-0.0159373	0.0323165	0.0132422	0.0183948	0.0114447	0.068396	-0.00876837	0.0302806	0.00312903	0.268709	-0.0213196	0.00611025	0.049419	0.114932	0.0364298	0.0162943	0.0236187	0.233938	-0.173366	-0.0175857	0.18584	-0.0932505	-0.0531225
	180	0.0736077	0.047329	0.0770307	0.0537913	0.0935098	-0.0176101	0.0146748	0.00786762	0.0152874	-0.00195862	0.0597999	0.0220016	0.0184891	0.00664798	0.251239	0.0178189	-0.0193262	0.0219373	0.141303	0.0283585	0.0278826	0.0217364	0.277176	-0.16494	-0.0355442	0.207668	-0.0992505	-0.0687364

## Sheet: Figure2J
Figure 2J
	Membrane/Ezrin maximum intensity time
	PM	Ezrin
	0	45
	3	24
	0	36
	0	30
	0	6
	0	18
	0	15
	0	6
	0	18
	3	18
	0	15
	0	60
	0	30
	3	24
