# Supplementary material for: A mechanosensing mechanism controls plasma membrane shape homeostasis at the nanoscale
Source: eLife. 2023 Sep 25;12:e72316. doi: 10.7554/eLife.72316 (PMC10569792; doi:10.7554/eLife.72316)
Supplement: Figure 3—figure supplement 1—source data 1. [file elife-72316-fig3-figsupp1-data1.xlsx]

## Sheet: FigureS2H
Figure S2H
	Fluorescence versus time
	Time (s)	4KE-IBAR															PM
	0	0.174453	0.00479989	0.177193	0.164035	0.201478	0.0618296	0.175486	0.545842	0.11697	0.803724	0.459529	0.610276	1.00936	0.584397	0.66866	0.193189	0.22249	0.403849	0.833808	0.299579	0.667467	0.839156	0.420462	0.619592	0.687063	1.01571	1.5555	2.92807	0.860404	1.14898
	3	0.270254	-0.017451	0.157449	0.187518	0.169634	0.0677755	0.168936	0.601975	0.126697	1.0443	0.209602	0.566516	1.05929	0.486065	0.469641	0.0391141	0.147984	0.411852	0.585371	0.337508	0.585122	0.802984	0.458352	0.62312	0.826641	0.757869	1.57082	2.03089	0.865486	1.18499
	6	0.0116212	-0.0127133	0.181467	0.243103	0.142809	0.0808133	0.142037	0.636861	0.14924	1.08341	0.234166	0.550857	1.10148	0.494799	0.407879	0.17359	0.0983494	0.407855	0.544335	0.357935	0.509848	0.634275	0.486322	0.628042	0.808511	0.434281	1.30559	1.96797	0.707239	1.09441
	9	0.40636	-0.00956143	0.222209	0.315303	0.193437	0.0850176	0.147034	0.544777	0.194473	1.0393	0.197674	0.655081	1.06769	0.414783	0.522886	0.396664	0.075497	0.410431	0.486618	0.348961	0.420777	0.611387	0.494766	0.571281	0.790515	0.279513	1.21004	1.82122	0.626503	0.989376
	12	0.447848	-0.00720515	0.251612	0.280546	0.170895	0.11051	0.145976	0.412043	0.105219	0.884942	0.184524	0.615273	1.16379	0.365015	0.500134	0.53716	0.0497611	0.422506	0.454879	0.35709	0.372371	0.782061	0.442063	0.314204	0.720532	0.157674	0.986278	1.73333	0.53563	0.960719
	15	0.436167	-0.0138139	0.279707	0.292674	0.171736	0.139223	0.173979	0.431264	0.168587	0.755854	0.176132	0.681063	1.03158	0.368209	0.416693	0.520087	0.0418316	0.44451	0.434312	0.362687	0.363745	0.596377	0.258636	0.403977	0.677874	0.0800357	0.967055	1.51724	0.481444	0.799693
	18	0.457066	-0.0219414	0.277094	0.258554	0.189225	0.118827	0.182072	0.559966	0.203785	0.678022	0.089849	0.567834	0.970015	0.329833	0.334316	0.493667	0.022168	0.468094	0.364029	0.354106	0.340025	0.611831	0.324847	0.426039	0.449223	0.093107	0.830856	1.31805	0.420253	0.74327
	21	0.529148	0.00355337	0.265772	0.268706	0.162749	0.112151	0.170361	0.544393	0.212204	0.626459	0.14432	0.584488	0.960686	0.245457	0.444666	0.503882	0.0135244	0.452542	0.347238	0.365437	0.333482	0.569128	0.374255	0.456853	0.406917	0.114495	0.7984	1.18854	0.363738	0.68375
	24	0.54203	0.00239351	0.308215	0.306061	0.169951	0.108347	0.0816547	0.531829	0.264207	0.637878	0.142911	0.568169	1.06122	0.182111	0.331632	0.484852	0.00727402	0.467683	0.295845	0.336307	0.27769	0.502133	0.370459	0.469009	0.33967	0.106502	0.67389	1.037	0.235496	0.66604
	27	0.557113	-0.00880978	0.32595	0.257418	0.167549	0.0933933	0.145848	0.521586	0.265559	0.646403	0.0756357	0.576071	0.813417	0.269428	0.316492	0.487057	0.0048377	0.452676	0.324265	0.328817	0.276631	0.433147	0.32566	0.491622	0.317749	0.0826252	0.447586	0.870892	0.181823	0.603578
	30	0.608059	0.0028174	0.325406	0.245956	0.158013	0.118999	0.15673	0.569662	0.297685	0.654135	0.148868	0.528332	0.866137	0.185326	0.304558	0.469816	0.0155008	0.438426	0.257773	0.312925	0.260582	0.396363	0.341466	0.471435	0.310234	0.0866548	0.554307	0.760563	0.20959	0.587279
	33	0.603237	0.00207708	0.30323	0.214682	0.13389	0.0927577	0.189022	0.509256	0.351842	0.607741	0.0499695	0.544225	0.993158	0.242295	0.350743	0.481118	0.00974379	0.418275	0.253317	0.344912	0.239599	0.319503	0.345897	0.485943	0.22807	0.0950897	0.5328	0.649514	0.172477	0.513712
	36	0.610421	-0.00574195	0.32364	0.161277	0.171271	0.131561	0.101862	0.572107	0.354019	0.597241	0.0631138	0.569338	0.864339	0.22196	0.375507	0.468336	0.00797964	0.412089	0.223343	0.314834	0.26101	0.260333	0.349693	0.47749	0.170196	0.0833708	0.530922	0.527158	0.137653	0.488288
	39	0.604353	-0.0129238	0.342558	0.0950598	0.140142	0.158165	0.149004	0.54638	0.344251	0.57286	0.139448	0.549258	0.841592	0.226814	0.260785	0.429837	0.00819785	0.407257	0.171401	0.31014	0.245238	0.243432	0.350519	0.453263	0.161511	0.0633229	0.475525	0.397293	0.117375	0.482343
	42	0.588851	0.00619182	0.33935	0.0946967	0.120429	0.0463128	0.135754	0.539393	0.324996	0.556275	0.0703602	0.605286	0.654097	0.161486	0.250556	0.419947	0.00106639	0.403503	0.169073	0.28786	0.251404	0.197614	0.31244	0.35355	0.183734	0.0811126	0.342243	0.328069	0.0962437	0.460923
	45	0.653564	-0.00423798	0.383896	0.0965357	0.154213	0.173826	0.128049	0.539146	0.330363	0.456797	0.0954792	0.548742	0.802038	0.0875198	0.262199	0.375847	0.00125586	0.364511	0.155765	0.299436	0.233263	0.183809	0.318397	0.365636	0.178908	0.0872586	0.32622	0.27595	0.0810462	0.384253
	48	0.658229	0.0144382	0.347354	0.0540438	0.135129	0.0950934	0.183843	0.563751	0.279305	0.558563	0.156527	0.516918	0.720774	0.118251	0.273684	0.363804	0.00145303	0.369529	0.0911496	0.298577	0.231444	0.121125	0.34031	0.36084	0.170434	0.0901795	0.328331	0.205238	0.0600128	0.338845
	51	0.582407	-0.00404827	0.347209	0.0366282	0.13214	0.116567	0.10013	0.563282	0.328684	0.492152	0.126464	0.481706	0.689018	0.154516	0.307877	0.34404	-0.00176417	0.355283	0.110165	0.279724	0.231367	0.115211	0.306092	0.347462	0.141894	0.0927759	0.307401	0.200219	0.0567389	0.351497
	54	0.664692	0.00401041	0.283452	-0.0209422	0.169642	0.0876165	0.172147	0.567118	0.298034	0.43529	0.178978	0.498447	0.696712	0.0985315	0.202733	0.324588	0.00332394	0.350712	0.098047	0.301455	0.214499	0.068971	0.310329	0.355693	0.116502	0.0861997	0.277199	0.158881	0.0148341	0.355731
	57	0.654649	-0.00223984	0.271848	-0.00576924	0.0982515	0.0737424	0.186863	0.520396	0.322785	0.46647	0.192806	0.509591	0.597872	0.149825	0.232079	0.301022	-0.00270901	0.352585	0.101883	0.230238	0.201175	0.0700714	0.30175	0.346778	0.136052	0.0912929	0.246443	0.14422	0.0408687	0.305028
	60	0.613471	-0.0156619	0.24462	-0.0282934	0.152746	0.0747537	0.220116	0.547986	0.306208	0.550569	0.154086	0.478904	0.462242	0.0621874	0.183082	0.288144	-0.00142845	0.352755	0.098059	0.239753	0.164305	0.0816435	0.296312	0.323411	0.102553	0.0923028	0.222201	0.131469	0.0481894	0.268691
	63	0.611377	-0.00590451	0.253576	-0.0259317	0.134829	0.0391705	0.168227	0.571418	0.340736	0.491628	0.129246	0.473747	0.602662	0.0363839	0.210603	0.265729	0.00643802	0.339357	0.145295	0.241591	0.144967	0.0584425	0.316401	0.330241	0.12238	0.0749589	0.209869	0.102699	0.0422782	0.248129
	66	0.596984	-0.0144702	0.313411	-0.00227697	0.116096	0.0656515	0.184062	0.538747	0.350544	0.370993	0.0969905	0.466204	0.596238	0.114902	0.148617	0.2487	-0.00118584	0.329999	0.130439	0.216266	0.147303	0.0788267	0.296939	0.352039	0.104332	0.0703773	0.178728	0.0802516	0.0399262	0.217001
	69	0.58084	-0.00784455	0.268324	-0.00513007	0.139428	0.0938345	0.244791	0.518027	0.35698	0.357491	0.156111	0.427467	0.594399	0.0900666	0.136489	0.20116	0.00863164	0.210758	0.123991	0.21412	0.154202	0.0563222	0.289627	0.348565	0.129525	0.0948226	0.16545	0.0647877	0.0257453	0.21868
	72	0.610269	-0.00154173	0.273919	-0.0123566	0.118173	0.0158806	0.21885	0.521852	0.344799	0.371331	0.142239	0.350095	0.56365	0.0526147	0.0144254	0.226584	0.00313768	0.225	0.124614	0.208291	0.153391	0.0312276	0.288839	0.341883	0.0816243	0.0705938	0.146097	0.074717	0.0301939	0.17784
	75	0.57918	-0.0306668	0.255848	-0.0272082	0.110149	0.0901682	0.22372	0.538879	0.347825	0.377499	0.0365413	0.33588	0.800949	0.0936315	0.125729	0.200869	0.0104987	0.211343	0.131572	0.207733	0.157514	0.0597096	0.293505	0.346158	0.0805358	0.0985817	0.126385	0.0532946	0.0211795	0.155216
	78	0.553915	0.00314445	0.278424	-0.0257889	0.0917249	0.0197097	0.203372	0.478846	0.348717	0.398265	0.172826	0.397457	0.662279	0.0133821	0.139373	0.195451	0.000720806	0.203299	0.0774519	0.181004	0.149013	0.0616528	0.283915	0.326143	0.0837139	0.0660784	0.131252	0.0423998	0.036989	0.104344
	81	0.405255	0.00410919	0.254626	-0.0384218	0.115946	0.137549	0.169811	0.531971	0.320148	0.551626	0.00286002	0.440173	0.518677	-0.0159988	0.0346217	0.148611	-0.00115204	0.189876	0.0683962	0.147186	0.1189	0.0581483	0.28384	0.249946	0.0828178	0.0544463	0.113435	0.00163432	0.0376827	0.103988
	84	0.413066	-0.0157921	0.252961	-0.109682	0.138431	0.0488208	0.155914	0.51723	0.31806	0.346328	0.0702123	0.522038	0.611166	0.0385944	0.123876	0.162071	-0.0054368	0.204181	0.0491768	0.207172	0.114785	0.0532694	0.239045	0.265041	0.105507	0.0629604	0.124528	0.024961	0.0412857	0.0619007
	87	0.417147	-0.0193545	0.218058	-0.0330865	0.134745	0.0746157	0.195659	0.533187	0.348079	0.335389	0.0610263	0.497509	0.60998	0.05579	0.0261909	0.141656	-0.00763934	0.189676	0.0732111	0.239009	0.0615063	0.0476632	0.196337	0.269337	0.0741155	0.0877808	0.12638	0.0236375	0.0349868	0.0995557
	90	0.415273	-0.0202433	0.206439	-0.071338	0.131853	0.0224417	0.129695	0.470535	0.319877	0.417515	0.0784221	0.462717	0.465972	-0.05596	0.0332435	0.133704	-0.0035327	0.175816	0.105452	0.206291	0.0813586	0.026528	0.210828	0.281422	0.0883948	0.0703947	0.113231	0.064286	0.0386198	0.0296579
	93	0.38765	-0.0282871	0.21663	-0.0261007	0.137627	-0.0091534	0.140683	0.483596	0.325917	0.393187	-0.0244807	0.428478	0.675428	-0.0262618	0.0777372	0.183631	-0.00189695	0.184401	0.100868	0.229693	0.083938	0.0308366	0.221404	0.284836	0.0952078	0.118349	0.100845	0.0708947	0.032004	0.0631379
	96	0.259632	-0.018287	0.22943	-0.0363865	0.135456	0.0804687	0.168231	0.446125	0.286139	0.396466	0.0510847	0.448673	0.589125	0.0617933	0.0893916	0.168153	-0.00037715	0.159862	0.108352	0.202313	0.0818682	-0.040307	0.200775	0.274752	0.0813374	0.0660515	0.0521805	0.0812934	0.0358311	0.0525145
	99	0.291385	-0.0109938	0.199746	-0.072742	0.114026	0.0115987	0.131141	0.504025	0.332797	0.450156	0.0187899	0.425732	0.567148	0.0166427	0.0864966	0.175577	0.00262545	0.158242	0.0790152	0.210753	0.0736076	0.00470101	0.195538	0.303503	0.078395	0.0787476	0.0583252	0.0649781	0.0247973	0.0739232
	102	0.297454	0.00647848	0.159875	-0.102793	0.136621	0.0446904	0.197078	0.443915	0.291282	0.392622	0.0883332	0.460061	0.575651	-0.0114665	0.0800165	0.169847	0.00573705	0.163457	0.101967	0.216776	0.0829789	-0.00268152	0.187677	0.257062	0.0736345	0.142412	0.0596716	0.0329472	0.0259854	0.0691715
	105	0.313703	-0.00531604	0.166169	-0.0710908	0.136228	0.0412371	0.190096	0.414514	0.321793	0.391091	0.0470555	0.441425	0.584411	-0.0149438	0.0127182	0.157527	-0.00313541	0.164148	0.13801	0.19855	0.0870208	-0.0197516	0.151518	0.252188	0.0943406	0.127017	0.0681394	0.0166891	0.0358557	0.0499297
	108	0.370552	0.000368248	0.134043	-0.0353242	0.0901641	0.0253601	0.164846	0.456596	0.253071	0.428769	0.0600141	0.299922	0.642368	-0.0991064	-0.0530867	0.166481	0.00034993	0.170829	0.0884975	0.192816	0.10273	-0.00558129	0.15888	0.20675	0.0832611	0.0760089	0.0721599	0.0501526	0.0260722	0.0633742
	111	0.357231	0.0129652	0.123264	-0.0649338	0.0881873	0.012856	0.191564	0.468019	0.313614	0.473393	0.000793309	0.419003	0.547108	-0.0524752	0.00403758	0.161165	0.00614062	0.153833	0.0853868	0.194648	0.0739961	-0.0296548	0.16774	0.235125	0.0757986	0.0574351	0.026035	0.039923	0.0354001	0.0458581
	114	0.346127	0.00580059	0.139894	-0.0252887	0.119662	0.0925912	0.161231	0.418763	0.266178	0.360567	0.0113449	0.442344	0.610937	-0.0643137	0.0515261	0.123147	0.000757361	0.172407	0.0875472	0.176836	0.0850592	-0.00423573	0.172676	0.230627	0.104119	0.10925	0.0229211	0.0392521	0.0227922	0.0653458
	117	0.328391	0.00928992	0.184497	-0.0416273	0.0947537	0.0982369	0.1739	0.520491	0.255702	0.414329	0.0223299	0.49887	0.566926	-0.0366589	0.0071082	0.144456	-0.00163237	0.158134	0.120761	0.180679	0.110203	-0.0190711	0.170449	0.221356	0.124177	0.0939272	0.014591	0.0167714	0.0371149	0.0368881
	120	0.311484	-0.0109162	0.154492	-0.0560316	0.116773	0.0665362	0.181557	0.438994	0.293372	0.399001	0.10341	0.384347	0.586452	-0.0518273	0.030895	0.149555	-0.00248283	0.158912	0.0992718	0.19682	0.100272	0.00866226	0.156519	0.217053	0.0935008	0.130127	-0.0144297	-0.0101114	0.0147949	0.0474343
	123	0.305316	0.0217835	0.152625	-0.0842066	0.0920804	0.0290584	0.109666	0.475065	0.373854	0.448173	0.126249	0.245237	0.497549	-0.0950098	0.0446266	0.120472	0.00591741	0.139279	0.124312	0.185655	0.105818	-0.0227474	0.16142	0.234279	0.110584	0.123685	0.00233033	-0.0300571	0.0178791	0.0476619
	126	0.365743	0.0141859	0.120796	-0.094322	0.109342	0.0774592	0.120396	0.463867	0.313002	0.431157	0.16672	0.322305	0.509777	-0.0562133	-0.00557127	0.127912	-0.00211754	0.132183	0.0741543	0.176995	0.0917934	-0.0150153	0.182734	0.224611	0.120945	0.0991818	-0.00262786	-0.0242564	0.0073541	0.00273045
	129	0.302042	0.00376945	0.111955	-0.177842	0.0964396	0.146766	0.125811	0.414927	0.288732	0.406098	0.119206	0.315729	0.561133	-0.0971924	0.00474794	0.134547	0.00269425	0.113432	0.0855697	0.179294	0.100872	-0.02088	0.166551	0.186093	0.113222	0.0701866	-0.0177688	-0.0272535	0.0134825	0.0249915
	132	0.299915	0.0136046	0.150219	-0.154578	0.0830435	0.0649995	0.091699	0.431368	0.298034	0.435382	0.0464031	0.231706	0.660831	-0.062387	-0.021703	0.144709	0.00291898	0.0988758	0.051064	0.187173	0.0818701	-0.0274379	0.143659	0.171381	0.0810427	0.0568252	-0.00577726	-0.0420522	-0.000419643	0.0291957
	135	0.294528	-0.00970636	0.13542	-0.147878	0.0575113	0.0541189	0.0763566	0.442128	0.313156	0.380091	0.075511	0.24997	0.41432	-0.0491276	-0.0180745	0.142464	-0.00527715	0.0942885	0.0598096	0.156729	0.0746717	0.0132563	0.146577	0.171614	0.108053	0.0802394	-0.0133325	-0.0193951	0.00945717	0.0373926
	138	0.292302	0.0143112	0.122529	-0.160235	0.0646926	0.109319	0.150035	0.4244	0.311919	0.47284	0.0768088	0.195732	0.384193	-0.0904509	-0.00174469	0.132635	0.000433865	0.0840114	0.0636292	0.169678	0.0816388	-0.03232	0.143621	0.161863	0.106656	0.0694942	0.00405571	-0.052409	-0.0121233	0.0185983
	141	0.266413	0.0125825	0.134361	-0.167139	0.101448	0.113997	0.101074	0.433199	0.311776	0.36315	0.00435849	0.23649	0.558166	-0.0265473	0.02352	0.123802	-0.00239805	0.0644661	0.0698199	0.147357	0.0878363	-0.0407418	0.13754	0.142489	0.0917199	0.073849	-0.0279236	0.0169619	0.0127269	0.0136019
	144	0.262507	0.0057232	0.0772448	-0.130821	0.0901025	0.0546128	0.136377	0.403391	0.310506	0.393513	0.047663	0.1374	0.311898	-0.0369315	0.00616333	0.126386	0.00111502	0.0744327	0.0657906	0.154227	0.103852	-0.0329778	0.134295	0.149441	0.0603845	0.0665619	-0.00945226	0.00210087	-0.00214643	0.0302957
	147	0.263281	0.0120685	0.0784047	-0.16613	0.092372	0.101524	0.0577901	0.405826	0.33893	0.289906	0.0800172	0.192985	0.714321	-0.0356498	0.00220249	0.134085	-0.000956287	0.0510946	0.103604	0.153238	0.109825	-0.00226661	0.135049	0.16233	0.0633984	0.118967	-0.00429636	0.000860957	0.0108296	0.0421443
	150	0.245504	0.00160247	0.058942	-0.0939981	0.0405584	0.103039	0.135048	0.423766	0.290919	0.238893	0.11692	0.189505	0.654162	-0.0708212	0.00765708	0.126595	-0.00652665	0.0485929	0.0950372	0.13025	0.100976	-0.0146616	0.129425	0.139626	0.0696454	0.0748712	-0.000582961	0.00524376	0.00276479	0.0317734
	153	0.219107	0.00148596	0.0620387	-0.104269	0.0789493	0.0797534	0.0862952	0.426897	0.27923	0.367462	0.109385	0.0806363	0.517902	-0.0553926	-0.0148848	0.115905	-0.00146079	0.0417738	0.114518	0.142642	0.122119	-0.0105814	0.13174	0.151177	0.107573	0.0940926	-0.00584837	0.0198137	0.0246866	0.0333728
	156	0.277654	0.00697985	0.041323	-0.0610393	0.069565	0.0207766	0.109787	0.40833	0.302672	0.349464	0.0352749	0.190363	0.570943	0.0151334	0.00868361	0.100461	0.00144223	0.0370484	0.126787	0.153596	0.097402	-0.00383393	0.122527	0.169831	0.105043	0.0913767	-0.00253291	-0.030513	0.00934951	0.0130542
	159	0.196712	-0.0102534	0.0816499	-0.053735	0.072304	0.0728316	0.133368	0.368235	0.289717	0.342205	0.131467	0.199531	0.580902	0.0339015	-0.0552827	0.105622	-0.00763313	0.0420028	0.10287	0.131008	0.087381	-0.0181829	0.120626	0.152817	0.0739081	0.114234	-0.00797017	-0.00630707	0.0139719	0.0383603
	162	0.18547	0.00263683	0.0111797	-0.133043	0.0705118	0.0633207	0.136812	0.355104	0.295164	0.360493	0.197882	0.262975	0.325485	0.0135771	-0.0220429	0.121096	-0.00225403	0.0274776	0.129156	0.120351	0.088979	-0.0188907	0.119828	0.15444	0.0804997	0.0493229	0.00421774	-0.026937	-0.00996293	0.000840564
	165	0.212552	0.00201375	0.000267934	-0.116663	0.102771	0.0138988	0.151141	0.365972	0.286774	0.497164	0.13624	0.201903	0.478944	0.0233265	0.0131323	0.0590838	0.00291642	0.0379776	0.0840433	0.120298	0.0529001	-0.0150619	0.115895	0.115362	0.0756209	0.125532	0.0155369	-0.0529622	-0.00839764	0.00574015
	168	0.172703	-0.00852234	-0.012261	-0.112696	0.0530773	0.00667369	0.178634	0.328997	0.313752	0.33493	0.0164289	0.0678099	0.388255	0.0350648	0.0697668	0.0731324	0.000451344	0.0405	0.130422	0.109241	0.0493315	-0.00699412	0.109876	0.119249	0.102129	0.103626	0.00130231	-0.0527126	0.0109217	0.0240617
	171	0.210726	-0.0041549	-0.0341772	-0.0121018	0.0777212	0.0264577	0.141665	0.372337	0.36318	0.385616	0.0948421	0.0605722	0.53214	0.0411918	-0.0497784	0.0601702	-0.00355476	0.0525923	0.132885	0.113637	0.0319559	-0.00145472	0.0925068	0.146738	0.086536	0.0583527	-0.00656072	0.0174892	-0.0029042	0.0321509
	174	0.131611	0.0155973	-0.0531644	-0.0708636	0.0834865	-0.00643256	0.111827	0.400944	0.304186	0.283862	0.0410523	0.0698581	0.504615	0.0552265	0.125047	0.0709693	-0.00815731	0.0603045	0.136544	0.117403	0.0450435	-0.0157429	0.105065	0.124158	0.0580116	0.104363	-0.0203986	0.00199621	0.0088445	0.00272655
	177	0.185079	0.00292449	0.0249393	-0.072395	0.083541	-0.0142428	0.0967077	0.394717	0.323463	0.292381	0.0681512	0.02498	0.518793	0.0694156	-0.0249673	0.0760027	-0.00309435	0.0551875	0.134235	0.109083	0.0512921	-0.0213345	0.0884557	0.140236	0.0748829	0.107878	-0.0349964	-0.0176512	0.00239872	-0.00178514
	180	0.173835	-0.017468	-0.000547064	-0.0399368	0.100088	0.0621484	0.177007	0.350525	0.304095	0.340635	0.144838	0.0511929	0.557113	0.0899074	-0.0434887	0.0474285	-0.00142072	0.0313777	0.129325	0.0908912	0.0355939	0.0206637	0.0981245	0.131632	0.0604335	0.0925201	-0.0314601	0.0230036	0.00826923	0.004169

## Sheet: FigureS2I
Figure S2I
	Fluorescence versus time
	Time (s)	I268N-CRIB									PM
	0	0.310341	0.297711	0.0809284	0.648215	0.516776	0.489308	0.327635	0.421541	0.281483	1.22022	1.15204	1.10193	1.51616	1.499	1.6973	0.877429	1.25107	1.25222
	3	0.349994	0.302373	0.166912	0.483462	0.629666	0.402784	0.273354	0.446309	0.328626	1.0576	1.09002	0.869308	1.22278	1.02288	1.2002	0.705408	1.08486	1.08838
	6	0.31615	0.316053	0.139696	0.553462	0.811158	0.477752	0.244892	0.433945	0.367989	1.04763	1.11707	0.885856	0.943685	1.16234	1.03912	0.548546	0.777368	0.95941
	9	0.364475	0.358494	0.106922	0.631314	0.825323	0.260141	0.272195	0.368611	0.312835	0.975795	1.10976	0.88438	0.828481	1.09839	0.853527	0.416183	0.769953	0.97933
	12	0.365318	0.365795	0.085244	0.698463	0.826302	0.3636	0.257575	0.256208	0.300291	0.959161	1.03805	0.889363	0.696465	1.169	0.687947	0.340643	0.619078	0.830144
	15	0.384446	0.393069	0.183871	0.580706	0.695651	0.280955	0.247543	0.299799	0.350762	0.966555	1.05201	0.809935	0.614216	0.833132	0.436254	0.289193	0.435803	0.763288
	18	0.32898	0.496344	0.0842948	0.46884	0.687724	0.280485	0.237764	0.354536	0.356826	0.952122	0.967583	0.80428	0.488465	0.772701	0.34539	0.319482	0.37509	0.751447
	21	0.371072	0.356921	0.110466	0.434236	0.733849	0.277805	0.221706	0.273465	0.259311	0.832739	0.95515	0.679702	0.317763	0.756286	0.282548	0.313643	0.325391	0.658038
	24	0.377165	0.408797	0.119612	0.362506	0.844841	0.226967	0.220725	0.264799	0.300329	0.828976	0.95575	0.657116	0.285709	0.765521	0.230326	0.315397	0.265412	0.53392
	27	0.305802	0.481907	0.168665	0.365169	0.731136	0.215377	0.232848	0.296084	0.30485	0.809605	0.856906	0.689037	0.264246	0.648854	0.153577	0.306144	0.224837	0.418113
	30	0.360197	0.525947	0.179223	0.27432	0.728454	0.192704	0.25077	0.306365	0.220746	0.759681	0.892155	0.662962	0.238505	0.628078	0.106614	0.291167	0.168808	0.52107
	33	0.311253	0.473813	0.187131	0.395062	0.659361	0.185793	0.198875	0.266848	0.236665	0.660017	0.897167	0.674764	0.185104	0.589285	0.0924152	0.271249	0.130047	0.517761
	36	0.340372	0.544821	0.218432	0.431493	0.638423	0.172244	0.228695	0.190667	0.290005	0.5973	0.805068	0.576141	0.193031	0.53371	0.0877203	0.260118	0.103543	0.516916
	39	0.35449	0.493059	0.176434	0.238475	0.498745	0.233719	0.208484	0.200411	0.313862	0.565997	0.772511	0.518699	0.132313	0.386773	0.0828639	0.226267	0.0743091	0.500367
	42	0.374147	0.49501	0.193501	0.215364	0.529511	0.0740981	0.206318	0.261811	0.19707	0.53083	0.752303	0.503683	0.107173	0.416761	0.0560407	0.203327	0.0614625	0.489244
	45	0.315168	0.479711	0.207699	0.375831	0.415591	0.160089	0.237977	0.205997	0.253787	0.542225	0.759542	0.552247	0.136064	0.290396	0.0465709	0.170524	0.0348506	0.465189
	48	0.301704	0.409194	0.300602	0.362207	0.272572	0.186351	0.198473	0.107824	0.31594	0.522672	0.693653	0.532223	0.101614	0.33407	0.0295519	0.158234	0.0426449	0.428151
	51	0.293333	0.484119	0.244626	0.309902	0.305108	0.260046	0.223443	0.112555	0.314281	0.448682	0.60916	0.502476	0.110464	0.342633	0.029978	0.159179	0.00166541	0.394777
	54	0.288741	0.405382	0.168301	0.212745	0.27237	0.264752	0.188485	0.165465	0.236617	0.432477	0.602997	0.441413	0.0927122	0.350237	0.0332781	0.152472	0.0236907	0.363379
	57	0.283442	0.468275	0.121529	0.386677	0.165163	0.065434	0.1395	0.204333	0.258324	0.37593	0.550551	0.413155	0.102097	0.242583	0.0130541	0.0879436	0.0387737	0.341406
	60	0.29015	0.439978	0.164024	0.395689	0.118228	0.209903	0.0906566	0.157658	0.254969	0.37595	0.546633	0.403514	0.0867042	0.237422	0.0182128	0.099335	0.0112681	0.327541
	63	0.249181	0.358394	0.182037	0.291924	-0.038829	0.227174	0.192665	0.179081	0.250221	0.361282	0.549402	0.342039	0.126732	0.201662	0.0167453	0.0908241	-0.000205237	0.29632
	66	0.199156	0.337021	0.16625	0.3272	-0.166092	0.199739	0.154093	0.0992761	0.246628	0.366729	0.536921	0.325691	0.0865166	0.131328	0.0170891	0.0838569	0.0171876	0.293166
	69	0.155019	0.256632	0.114511	0.257881	-0.10061	0.10741	0.159035	0.0885346	0.309503	0.344066	0.531786	0.289825	0.110585	0.108715	0.00225309	0.0776808	0.00124471	0.286192
	72	0.118163	0.410407	0.0855335	0.330215	-0.148669	0.195183	0.159871	0.0734271	0.195114	0.305241	0.493064	0.238031	0.121308	0.118356	-0.0127664	0.0760223	0.00492978	0.262968
	75	0.139367	0.30924	0.127366	0.364674	-0.195055	0.138785	0.172906	0.0414224	0.225563	0.295559	0.478776	0.217725	0.117259	0.0638051	-0.00120828	0.0748495	-0.0319723	0.264402
	78	0.163196	0.350311	-0.0294663	0.340113	-0.240922	0.123226	0.152951	0.110188	0.227437	0.25565	0.490184	0.245771	0.093302	0.0635616	-0.00178066	0.0692631	-0.0402191	0.258197
	81	0.104707	0.271889	0.0346908	0.239305	-0.233373	0.173572	0.172522	0.00254859	0.180261	0.244871	0.470924	0.250828	0.107317	0.0710414	-0.00897462	0.062667	-0.0301758	0.23371
	84	0.132874	0.352259	-0.0300395	0.387094	-0.146198	0.178315	0.224878	-0.0155238	0.169393	0.242569	0.463641	0.235908	0.103837	0.0494655	0.00191873	0.0638011	-0.0200841	0.20631
	87	0.170249	0.356439	0.0392145	0.354071	-0.137797	0.127771	0.160407	-0.114232	0.183467	0.166819	0.4688	0.205402	0.0985202	0.0582771	-0.00973187	0.0641733	-0.0671558	0.206309
	90	0.139866	0.389716	-0.0137682	0.417233	-0.147387	0.159271	0.169296	-0.0879701	0.173525	0.227518	0.45718	0.187605	0.0811465	0.0224996	0.00157826	0.0613942	-0.0398705	0.215903
	93	0.158118	0.362617	-0.04641	0.350093	-0.131211	0.00259426	0.12755	-0.0849519	0.211762	0.221153	0.450268	0.196152	0.0737418	0.0503228	-0.0143048	0.0695928	-0.0596197	0.208743
	96	0.15841	0.414278	-0.042928	0.367463	-0.101421	0.0620914	0.157165	0.0146358	0.217498	0.182482	0.442173	0.193769	0.0810263	0.0377296	-0.00455901	0.0717828	-0.0953193	0.207471
	99	0.103403	0.334284	-0.0242644	0.414609	-0.101434	0.0958026	0.148437	-0.0541928	0.148098	0.195414	0.409126	0.173785	0.0965367	0.055907	-0.00805662	0.0698127	-0.0622888	0.204661
	102	0.160219	0.276192	-0.017718	0.382288	-0.0839624	0.0873567	0.162681	-0.0135108	0.255489	0.20033	0.381209	0.200333	0.111528	0.0522371	-0.027253	0.0713475	-0.0135047	0.198458
	105	0.109055	0.34882	-0.0278026	0.45597	-0.100384	0.021705	0.142419	0.0095706	0.230446	0.183593	0.383932	0.187293	0.104685	0.0520035	-0.00880168	0.0632869	-0.0667469	0.200219
	108	0.201688	0.317639	-0.0438452	0.412777	-0.0153021	0.0918305	0.168666	-0.0381805	0.202246	0.17147	0.363284	0.202189	0.0491481	0.0372519	-0.0288076	0.0663544	-0.0442768	0.191767
	111	0.110773	0.300481	-0.00621225	0.405687	-0.0825734	0.081086	0.123833	0.0438099	0.188435	0.17957	0.35413	0.218933	0.0628684	0.0203845	-0.026401	0.0602298	-0.0704682	0.191283
	114	0.174011	0.34202	-0.0988541	0.443364	-0.0173231	0.15177	0.11019	-0.0953666	0.203709	0.181748	0.328881	0.205843	0.0938141	0.00228369	-0.0322921	0.0651651	-0.0461192	0.163309
	117	0.170244	0.244752	-0.0993821	0.527321	-0.0403814	0.0382293	0.143471	-0.0455298	0.17598	0.173985	0.306529	0.209846	0.0889241	-0.030477	-0.0214438	0.0648267	-0.0554903	0.166889
	120	0.174287	0.218411	-0.15165	0.587031	-0.00897591	0.14382	0.141389	0.0605414	0.202121	0.197796	0.263546	0.215703	0.0705957	0.0165581	-0.041447	0.0715799	-0.0314798	0.179025
	123	0.118585	0.347584	-0.162673	0.570487	-0.0760274	0.126804	0.132028	0.0408002	0.199258	0.207323	0.284832	0.160301	0.0849472	0.0580491	-0.0457326	0.0655109	-0.030569	0.176699
	126	0.157033	0.33713	-0.0966334	0.485431	-0.0529118	0.0771582	0.126761	0.113368	0.158087	0.133885	0.264161	0.138111	0.0794443	0.023353	-0.0297941	0.0630595	-0.04547	0.179322
	129	0.11656	0.320675	-0.147933	0.790972	-0.179027	0.185295	0.150125	0.042615	0.232392	0.134002	0.235852	0.148833	0.127151	0.00134854	-0.0386885	0.060925	-0.0215067	0.173063
	132	0.156813	0.352486	-0.176288	0.763353	-0.177348	0.150565	0.094076	-0.00634542	0.20002	0.120614	0.245345	0.157319	0.10116	0.0208736	-0.0252271	0.0619118	-0.0541806	0.16428
	135	0.11612	0.33261	-0.0726426	0.594565	-0.104811	0.0254436	0.102595	-0.00497833	0.206608	0.1263	0.277444	0.145826	0.102433	-0.0231469	-0.0331421	0.0598747	-0.00600915	0.16618
	138	0.0471654	0.384219	-0.14057	0.687683	-0.110013	0.0520573	0.106679	0.0576384	0.126722	0.124508	0.25032	0.162944	0.120357	0.00967567	0.00161368	0.0588913	-0.0232699	0.152644
	141	0.148169	0.414961	-0.208383	0.619956	-0.108391	0.086814	0.127945	-0.0740702	0.186181	0.107883	0.229565	0.163402	0.104532	-0.00569889	0.00839247	0.0679919	-0.00176398	0.149606
	144	0.134532	0.46181	-0.0929482	0.619069	-0.194771	0.0775565	0.116743	-0.101859	0.215543	0.0983107	0.23983	0.148837	0.126395	0.00865958	0.0106798	0.0726336	-0.0118965	0.14952
	147	0.178148	0.319664	-0.0473135	0.609298	-0.128533	0.0445406	0.122653	-0.0176577	0.174435	0.101591	0.219855	0.174963	0.161332	0.0100296	0.0165444	0.0666065	-0.010065	0.13446
	150	0.158185	0.332152	-0.0871148	0.552917	-0.0133841	0.0457006	0.11457	0.0416991	0.23891	0.0957414	0.192797	0.182054	0.157326	-0.0126683	0.0120959	0.0521433	-0.0378271	0.120265
	153	0.118006	0.431156	-0.17329	0.682914	-0.125633	0.0722491	0.12182	-0.0181388	0.223062	0.0903786	0.184495	0.19987	0.182477	-0.0202781	0.00807326	0.0557635	-0.0213758	0.100003
	156	0.161098	0.325578	-0.104387	0.62979	-0.148266	-0.00957924	0.120359	-0.00392951	0.142151	0.119922	0.15138	0.182889	0.157558	0.00218771	-0.00367885	0.0640059	-0.0145518	0.132776
	159	0.139052	0.290407	-0.270022	0.674549	-0.205868	0.0142928	0.112586	-0.0495727	0.190799	0.109137	0.190317	0.153167	0.146305	-0.0318109	-0.000230171	0.0503792	-0.0293473	0.145521
	162	0.127384	0.335784	-0.241512	0.633027	-0.215115	0.037053	0.156693	-0.0329215	0.186791	0.0707893	0.166489	0.178934	0.100006	-0.0203427	0.0019117	0.0401782	-0.0214619	0.150855
	165	0.0909004	0.345939	-0.155639	0.633629	-0.192364	0.136473	0.132943	0.0618866	0.139278	0.105085	0.187284	0.193619	0.123882	-0.0284413	0.0143185	0.030594	0.0331047	0.146387
	168	0.136109	0.232902	-0.207229	0.560015	-0.221494	0.0327032	0.134926	0.0769082	0.201711	0.112004	0.15381	0.157031	0.138658	-0.0678562	-0.00173004	0.027844	-0.0103001	0.157378
	171	0.0826733	0.266239	-0.259225	0.506161	-0.370512	0.0324791	0.112921	0.0122389	0.166057	0.105076	0.154296	0.157193	0.118166	-0.107672	-0.00876805	0.036474	0.0101031	0.160845
	174	0.064269	0.296325	-0.203208	0.548129	-0.421493	0.0712468	0.0774031	0.0450433	0.138377	0.0890083	0.160606	0.191452	0.100619	-0.0649209	-0.0048625	0.0307828	0.00204043	0.155387
	177	0.0308906	0.272755	-0.261068	0.603848	-0.467696	0.145723	0.0918971	0.0659675	0.190498	0.106962	0.154813	0.185344	0.111154	-0.0900665	-0.00367903	0.0389237	0.0281528	0.150033
	180	0.051638	0.220746	-0.167632	0.595807	-0.548276	0.00753269	0.108164	0.10635	0.161373	0.0840988	0.15355	0.19381	0.103553	-0.0645244	-0.0126161	0.0450879	-0.00786997	0.161612

## Sheet: FigureS2J
Figure S2J
	Fluorescence versus time
	Time (s)	IBAR-domain-GFP														PM
	0	0.358123	0.319973	0.49896	0.586141	0.393388	0.679911	0.42127	0.860778	0.660009	0.759777	0.671186	1.02632	0.469391	0.555184	0.61292	0.603025	0.130166	1.84524	0.878637	0.926519	0.501488	2.07293	1.56545	1.92127	1.39728	1.80246	1.38032	1.49083
	3	0.414738	0.356298	0.773091	0.588396	0.426418	0.713234	0.327386	0.658621	0.60329	0.765953	0.698326	1.31311	0.411429	0.543982	0.671902	0.729585	1.09606	1.78938	0.842902	1.03181	0.337276	1.18193	1.07083	1.82607	1.0187	1.96252	1.02844	1.58676
	6	0.447609	0.317357	0.761775	0.574224	0.466366	0.743918	0.416562	0.642709	0.60657	0.711291	0.74546	1.32589	0.45013	0.584911	0.622242	0.015975	0.769058	0.782734	0.769901	0.980661	0.126021	1.07935	1.05739	1.78884	1.50713	1.61583	1.01439	1.41055
	9	0.405831	0.352182	0.738308	0.628452	0.500226	0.707016	0.347325	0.65901	0.608729	0.736838	0.745859	1.42114	0.474637	0.630346	0.65581	0.300151	0.906014	1.49409	0.743437	0.990967	0.0248911	0.995038	1.16705	1.8115	1.23248	1.68534	1.11962	1.54533
	12	0.417047	0.521836	0.729116	0.594811	0.514648	0.702027	0.227726	0.834214	0.57854	0.761063	0.800152	1.47123	0.472645	0.625309	0.559741	0.64032	1.0095	1.5248	0.752614	0.789561	0.107405	1.22233	1.1267	1.84364	1.3399	1.74333	1.09027	1.51163
	15	0.359475	0.581063	0.700151	0.595638	0.500264	0.675827	0.214074	0.934923	0.593501	0.750023	0.770258	1.56239	0.499417	0.652292	0.527266	0.698675	0.904018	1.39717	0.721113	0.861666	0.136217	1.5331	0.981358	1.91481	1.42574	1.81933	1.1929	1.59928
	18	0.362865	0.609981	0.639241	0.601442	0.518084	0.711768	0.355037	0.962534	0.45325	0.779284	0.83934	1.42484	0.540574	0.683817	0.538908	0.758369	0.813929	1.35462	0.618368	0.851788	0.304489	1.58782	0.688835	2.01938	1.07805	1.3414	1.29678	1.66292
	21	0.449388	0.608765	0.678092	0.567574	0.542567	0.7359	0.332218	0.974455	0.551484	0.560098	0.856235	1.5796	0.539566	0.746095	0.613782	0.704907	0.592569	1.31907	0.628201	0.859138	0.232769	1.58837	0.884245	0.756243	1.27627	1.42627	1.37318	1.7141
	24	0.471399	0.618706	0.666433	0.599518	0.565006	0.725881	0.245219	0.977221	0.55722	0.671741	0.886236	1.62921	0.548175	0.60455	0.668835	0.653717	0.631345	1.14904	0.629968	0.868023	0.147646	1.58491	0.831223	1.33725	1.20894	1.44756	1.31536	1.21299
	27	0.493116	0.646294	0.634741	0.562273	0.537754	0.751961	0.22036	1.01427	0.522431	0.661104	0.898085	1.58611	0.539968	0.659621	0.630554	0.690357	0.695414	1.07199	0.685241	0.854419	0.0743406	1.56813	0.620915	1.3718	1.29299	1.29936	1.34956	1.16667
	30	0.580869	0.670765	0.628835	0.498767	0.604464	0.711196	0.305534	0.978915	0.545675	0.669628	0.894125	1.7078	0.540125	0.642888	0.628715	0.674556	0.677558	1.06054	0.674328	0.800463	0.0892192	1.54578	0.752548	1.38062	1.30101	1.32237	1.38968	1.16375
	33	0.561966	0.680191	0.64848	0.517742	0.577714	0.707372	0.354631	0.99406	0.502272	0.68396	0.900786	1.78833	0.546711	0.645792	0.641916	0.654622	0.616477	0.858913	0.665364	0.739042	0.308722	1.59628	0.709643	1.36797	1.3423	1.29777	1.41606	1.21447
	36	0.665775	0.702999	0.631968	0.541935	0.590622	0.715581	0.360724	0.946274	0.508267	0.715707	0.882086	1.82548	0.54372	0.662456	0.654071	0.659164	0.58327	0.990136	0.687654	0.736731	0.291634	1.55666	0.7524	1.4068	1.07699	1.29583	1.32046	1.16473
	39	0.732158	0.69919	0.569886	0.522889	0.55943	0.704592	0.342305	0.890599	0.461722	0.669809	0.865559	1.92067	0.535919	0.667792	0.654007	0.638432	0.478773	0.960048	0.666939	0.677501	0.271784	1.54897	0.515634	1.4391	1.1925	1.30619	1.25347	1.1877
	42	0.759908	0.707356	0.567162	0.506848	0.577577	0.698135	0.319355	0.91336	0.421025	0.68787	0.836179	1.91455	0.53408	0.597972	0.594737	0.642204	0.361202	0.94587	0.593595	0.639163	0.203951	1.36755	0.521257	1.36837	1.15616	1.17725	1.30139	1.15674
	45	0.766569	0.761502	0.646097	0.513204	0.573219	0.737797	0.329202	0.932255	0.419014	0.624622	0.856066	1.88197	0.521773	0.573925	0.589667	0.584523	0.377474	0.923439	0.585432	0.610562	0.184907	1.30537	0.438927	1.34761	1.17251	1.12423	1.29562	1.07493
	48	0.773215	0.771612	0.562686	0.451091	0.55506	0.674152	0.31079	0.853364	0.356814	0.639196	0.801098	1.74969	0.487306	0.547673	0.53117	0.543994	0.451156	0.838594	0.557378	0.653877	0.167269	1.26255	0.378889	1.3262	1.08881	0.949031	1.31266	1.07308
	51	0.833324	0.743763	0.541365	0.474939	0.602905	0.70782	0.28106	0.884242	0.350511	0.609745	0.767735	1.73588	0.524501	0.530935	0.556162	0.538888	0.384913	0.801589	0.500059	0.622854	0.124958	1.19621	0.320245	1.27428	0.944969	0.885001	1.22624	1.04346
	54	0.896211	0.720613	0.588304	0.47911	0.575065	0.692666	0.250124	0.876518	0.343298	0.623188	0.794828	1.69453	0.508756	0.565726	0.539502	0.503572	0.330894	0.769606	0.514817	0.599544	0.113613	1.11537	0.336479	1.18146	0.968361	0.863973	1.24263	1.02157
	57	0.891664	0.673487	0.56816	0.479668	0.548962	0.727215	0.238247	0.821521	0.306677	0.525146	0.803587	1.72502	0.494264	0.576698	0.517527	0.467289	0.341709	0.68334	0.504095	0.573522	0.0719434	0.968291	0.263829	1.01615	0.979457	0.797712	1.26689	1.04638
	60	0.894559	0.70061	0.528708	0.527265	0.590823	0.690611	0.238113	0.811639	0.272591	0.54259	0.786641	1.65057	0.474785	0.587198	0.486741	0.448228	0.298053	0.621557	0.490201	0.494148	0.0496362	0.787814	0.247985	0.964278	1.00742	0.773716	1.20333	1.06609
	63	0.874256	0.657385	0.563976	0.513041	0.597293	0.628781	0.204735	0.797302	0.307556	0.592023	0.752395	1.49361	0.485762	0.590586	0.35458	0.39631	0.297842	0.557173	0.452013	0.435096	0.0566972	0.862938	0.221356	1.24741	1.03856	0.643332	1.19392	1.03441
	66	0.789519	0.652479	0.587602	0.455401	0.577775	0.676487	0.23058	0.75108	0.271692	0.578928	0.727984	1.4127	0.46548	0.575826	0.38837	0.352679	0.280305	0.487721	0.438639	0.423916	0.026369	0.812196	0.166037	1.20734	0.744415	0.492864	1.21566	0.985427
	69	0.822241	0.64126	0.535558	0.368665	0.541116	0.644953	0.22463	0.709808	0.220293	0.526075	0.748444	1.36347	0.458706	0.551613	0.35326	0.345444	0.26161	0.456972	0.411295	0.458123	0.048523	0.812476	0.196079	1.18403	0.801244	0.454901	1.22922	0.969779
	72	0.830041	0.637405	0.526779	0.379534	0.55123	0.581237	0.21627	0.710778	0.25165	0.487913	0.735839	1.38973	0.452669	0.551971	0.377257	0.339385	0.287193	0.356942	0.382326	0.451519	0.0336304	0.745397	0.191818	1.13879	0.824343	0.430662	1.10288	0.947369
	75	0.821083	0.619214	0.586344	0.375237	0.498022	0.628855	0.210015	0.6341	0.255863	0.478334	0.726774	1.31651	0.455466	0.534356	0.409103	0.319193	0.263242	0.32686	0.341736	0.408749	0.0395824	0.70323	0.114903	1.13194	0.823716	0.398699	1.08023	0.976827
	78	0.875253	0.596553	0.577423	0.333003	0.481908	0.643559	0.203865	0.65272	0.24421	0.489869	0.713123	1.27654	0.48511	0.519813	0.411609	0.301085	0.261269	0.313688	0.367532	0.391664	0.0480622	0.555665	0.0615871	1.04918	0.77078	0.36809	1.08274	0.933406
	81	0.823695	0.587846	0.584734	0.324647	0.463092	0.67365	0.196916	0.664708	0.258641	0.47627	0.712457	1.24775	0.482204	0.506144	0.352322	0.289197	0.305093	0.261372	0.340654	0.364619	0.0422815	0.474023	0.0700901	1.0418	0.756339	0.354532	1.08539	0.924241
	84	0.857563	0.523063	0.56833	0.358411	0.461397	0.62769	0.197464	0.630681	0.186194	0.476899	0.704035	1.2067	0.48277	0.503852	0.353769	0.265492	0.234999	0.260276	0.305879	0.39663	0.059736	0.457656	0.0601252	0.969076	0.756387	0.333744	1.06247	0.906015
	87	0.849683	0.521075	0.549289	0.363081	0.488549	0.640192	0.193393	0.598571	0.199213	0.44361	0.670177	1.16106	0.465056	0.476888	0.364264	0.242781	0.249382	0.258528	0.286733	0.381442	0.0449632	0.39876	0.0187449	0.815817	0.706492	0.331301	1.04534	0.872341
	90	0.759606	0.47909	0.613311	0.347968	0.480165	0.610788	0.182071	0.577119	0.186864	0.438337	0.640238	1.18418	0.471639	0.494404	0.312237	0.217298	0.203713	0.238529	0.257817	0.365002	0.0397819	0.32444	-0.0131768	0.863528	0.717578	0.310712	0.998521	0.837126
	93	0.677776	0.458854	0.55444	0.348762	0.481588	0.637183	0.181239	0.541877	0.200796	0.441697	0.681391	1.06561	0.464203	0.464161	0.29147	0.206098	0.205094	0.209125	0.2507	0.387949	0.0426857	0.280213	0.0355378	0.803216	0.667969	0.28078	1.01316	0.794006
	96	0.776118	0.435644	0.585067	0.339146	0.438771	0.644564	0.17923	0.563353	0.175725	0.412326	0.638522	1.06055	0.451641	0.44487	0.288703	0.189321	0.191179	0.203214	0.239851	0.377756	0.0419894	0.252704	0.0380636	0.777208	0.601958	0.302311	1.00998	0.73058
	99	0.711449	0.429351	0.586243	0.398332	0.442391	0.585229	0.18863	0.559576	0.165293	0.407552	0.633379	1.07785	0.429572	0.413763	0.337388	0.176201	0.207883	0.193942	0.219901	0.299479	0.0370761	0.197959	-0.056414	0.719992	0.668313	0.242699	1.02106	0.723214
	102	0.762694	0.443157	0.581326	0.402058	0.423028	0.631696	0.189098	0.579889	0.149054	0.40028	0.60752	1.06042	0.430774	0.444233	0.295588	0.172668	0.151064	0.160701	0.214248	0.316686	0.033729	0.184886	-0.0413096	0.651863	0.696579	0.245336	1.00882	0.738291
	105	0.717857	0.429391	0.561741	0.412145	0.372512	0.627254	0.200561	0.547295	0.200444	0.390412	0.595111	0.996897	0.419616	0.426648	0.32638	0.176446	0.202762	0.158495	0.172225	0.315304	0.0325873	0.132729	-0.0221506	0.601846	0.693748	0.224616	1.02721	0.731962
	108	0.709951	0.433188	0.555354	0.396062	0.390022	0.591356	0.195985	0.529093	0.177186	0.381204	0.589211	0.894124	0.439597	0.431671	0.356056	0.156481	0.178956	0.117095	0.132782	0.30038	0.038609	0.0891205	-0.0457477	0.577701	0.695386	0.170613	1.00357	0.710901
	111	0.744177	0.429078	0.568379	0.403349	0.358412	0.607777	0.206621	0.49033	0.200501	0.302446	0.582002	0.868046	0.435104	0.395394	0.31598	0.161523	0.173688	0.162055	0.123206	0.296933	0.0301762	0.120578	0.0148695	0.550659	0.676693	0.189992	1.01561	0.707981
	114	0.684776	0.397642	0.569369	0.403274	0.333783	0.565894	0.186163	0.484124	0.191002	0.339882	0.561721	0.82721	0.41526	0.392878	0.317872	0.163293	0.212885	0.132616	0.120983	0.272636	0.0391558	0.155456	-0.0356319	0.546197	0.665112	0.141202	0.839568	0.67594
	117	0.685717	0.356701	0.621484	0.370961	0.28854	0.530757	0.178069	0.462229	0.218286	0.328381	0.531804	0.82505	0.398782	0.363912	0.306035	0.162235	0.18607	0.111613	0.090618	0.261442	0.0174756	0.139119	-0.0189762	0.49818	0.656801	0.145466	0.738788	0.665505
	120	0.665279	0.359852	0.587511	0.429798	0.288021	0.584602	0.202647	0.474191	0.194083	0.282484	0.534069	0.771788	0.420038	0.35379	0.325397	0.133914	0.218053	0.125031	0.075866	0.297076	0.0209251	0.12381	-0.00332504	0.471797	0.624376	0.139177	0.737442	0.669888
	123	0.695411	0.348747	0.60386	0.388653	0.277767	0.557802	0.187535	0.489553	0.164053	0.282824	0.521589	0.729422	0.39288	0.371122	0.31318	0.109639	0.215553	0.115335	0.094223	0.292521	0.0433263	0.0963025	0.0147724	0.468627	0.555725	0.141495	0.722214	0.636011
	126	0.672093	0.334051	0.585827	0.376427	0.272579	0.593002	0.166096	0.467705	0.199143	0.286015	0.479189	0.72437	0.348435	0.356026	0.273291	0.134053	0.228186	0.123096	0.089055	0.269336	0.0418857	0.074423	-0.0718875	0.423607	0.550604	0.156938	0.71851	0.645808
	129	0.602342	0.326834	0.640976	0.327301	0.261057	0.561876	0.194198	0.484755	0.172183	0.315869	0.475639	0.718376	0.366791	0.36271	0.31382	0.118352	0.201592	0.114306	0.076065	0.280313	0.0280109	0.10871	-0.0170916	0.396951	0.528106	0.135646	0.698065	0.638313
	132	0.599077	0.329157	0.616	0.304898	0.216874	0.556584	0.188157	0.476382	0.163753	0.280083	0.468014	0.661364	0.337305	0.374811	0.281705	0.09318	0.232575	0.105867	0.047837	0.270171	0.0302237	0.115648	-0.0380998	0.366228	0.518707	0.113877	0.671208	0.620651
	135	0.525227	0.319533	0.563618	0.232047	0.238381	0.541333	0.186222	0.453142	0.149473	0.28569	0.451166	0.612905	0.356683	0.312625	0.274346	0.080856	0.239883	0.103118	0.055312	0.27851	0.0319088	0.114672	-0.00805119	0.331877	0.546062	0.101572	0.640018	0.540288
	138	0.572366	0.305391	0.615697	0.196513	0.215986	0.547666	0.188604	0.475257	0.154807	0.336976	0.446677	0.618009	0.313768	0.28011	0.25568	0.093708	0.208146	0.11338	0.041429	0.281825	0.0230645	0.112681	-0.0388521	0.29268	0.52062	0.0968269	0.649486	0.435799
	141	0.510124	0.292755	0.61565	0.15677	0.199907	0.571301	0.185466	0.44755	0.150908	0.335038	0.455499	0.616402	0.335249	0.351329	0.266118	0.065168	0.196012	0.094935	0.052521	0.270605	0.0125454	0.113203	-0.0626241	0.30798	0.515865	0.119908	0.646224	0.457235
	144	0.516486	0.290471	0.60537	0.121398	0.21932	0.565395	0.185451	0.435543	0.147885	0.268174	0.406788	0.607563	0.318227	0.339202	0.272971	0.057454	0.210364	0.097601	0.014039	0.267558	0.0348279	0.0545334	-0.0196949	0.303937	0.52726	0.0992366	0.598993	0.559195
	147	0.472938	0.285532	0.556782	0.155403	0.205698	0.510491	0.175897	0.427892	0.124099	0.285599	0.415918	0.579529	0.322151	0.333576	0.242482	0.059498	0.265008	0.133269	0.057649	0.269512	0.0364937	0.0589005	-0.0416466	0.298353	0.526217	0.108022	0.594264	0.570633
	150	0.465363	0.25807	0.619789	0.133767	0.175711	0.482876	0.175715	0.449727	0.123359	0.253711	0.417476	0.544937	0.326417	0.350804	0.210692	0.055459	0.248451	0.097879	0.035268	0.275276	0.0157315	0.0676581	-0.0779068	0.308057	0.503045	0.0991412	0.578828	0.564558
	153	0.429427	0.2581	0.563507	0.121146	0.195024	0.46099	0.180181	0.433831	0.129709	0.229319	0.435224	0.556651	0.303262	0.345566	0.216514	0.065332	0.223355	0.059967	0.036789	0.235952	0.0381195	0.0353532	-0.0512148	0.245296	0.502972	0.111919	0.549024	0.533632
	156	0.433034	0.211628	0.645792	0.134159	0.202381	0.445172	0.167443	0.403456	0.121482	0.204643	0.413354	0.538809	0.287981	0.349927	0.182457	0.061204	0.229756	0.087043	0.06477	0.191442	0.0265402	0.0147432	-0.0353115	0.275084	0.469998	0.0936035	0.547575	0.521406
	159	0.412586	0.221845	0.568835	0.138537	0.19105	0.470403	0.169589	0.355875	0.173521	0.184978	0.409938	0.537988	0.263381	0.35349	0.183354	0.039682	0.198118	0.06681	0.049268	0.204999	0.0180947	0.00514381	-0.0154057	0.277281	0.446785	0.0909044	0.549252	0.508969
	162	0.406851	0.236598	0.592894	0.146557	0.174277	0.465119	0.168723	0.379016	0.169167	0.190068	0.40187	0.513967	0.257685	0.33514	0.204207	0.048079	0.206642	0.1017	0.064296	0.19476	0.0124252	0.0165535	-0.0193448	0.263174	0.48072	0.0543004	0.525969	0.512146
	165	0.417332	0.241866	0.590079	0.126366	0.159805	0.419152	0.162917	0.394551	0.187722	0.198555	0.371154	0.499077	0.253822	0.322643	0.188415	0.055816	0.220683	0.075927	0.04525	0.176992	0.0286723	-0.0260554	0.000146529	0.223039	0.504148	0.0509497	0.531021	0.488319
	168	0.434826	0.220159	0.577614	0.142007	0.18321	0.423817	0.17062	0.402777	0.199552	0.199475	0.374401	0.504928	0.250595	0.299999	0.168636	0.04271	0.222417	0.083631	0.04683	0.179727	0.015995	-0.0376693	0.0183232	0.219677	0.473794	0.0781864	0.517122	0.487124
	171	0.450339	0.214554	0.545406	0.120521	0.17698	0.382464	0.156001	0.40965	0.16921	0.172387	0.35374	0.4467	0.235051	0.295315	0.160853	0.055487	0.210326	0.091141	0.045591	0.179022	0.0244941	-0.0901306	-0.0203222	0.215422	0.501788	0.0627399	0.505333	0.477806
	174	0.420051	0.214532	0.527488	0.118943	0.171181	0.416359	0.162682	0.453894	0.14436	0.187508	0.354839	0.473327	0.233196	0.296128	0.160642	0.043294	0.196424	0.094319	0.037152	0.196828	0.0282377	-0.0826623	-0.0661886	0.221072	0.502985	0.0903688	0.411371	0.452601
	177	0.415924	0.204251	0.592073	0.092444	0.181633	0.38603	0.153766	0.475512	0.131834	0.164284	0.350029	0.444894	0.234904	0.268368	0.152599	0.056168	0.227151	0.10619	0.039409	0.141594	0.025734	-0.109096	-0.0380584	0.219558	0.491359	0.0925111	0.411401	0.440611
	180	0.40923	0.187245	0.608761	0.103289	0.185358	0.35292	0.15579	0.463474	0.146541	0.115728	0.358177	0.449965	0.232573	0.265861	0.151053	0.049673	0.216729	0.098019	0.035273	0.146337	0.0279094	-0.12774	-0.0282755	0.20846	0.50759	0.0734453	0.409176	0.439118

## Sheet: FigureS2K
Figure S2K
	Fluorescence versus time
	Time (s)	I408P-SH3-GFP												PM
	0	0.43067	0.51449	0.0865705	0.141332	-0.0275856	-0.00740582	0.11061	0.350575	0.387418	0.805836	0.295917	0.54972	1.01585	1.39963	1.50939	0.893305	0.478454	0.303969	0.244254	1.42399	0.64605	0.963329	1.05652	0.751241
	3	0.680959	0.62028	0.106136	0.204045	0.00526482	0.0219568	0.0840009	0.489377	0.305116	1.04319	0.27788	0.601259	0.784784	1.51684	1.33851	0.755228	0.203696	0.114397	0.251512	1.30341	0.330585	1.28311	0.953579	0.652947
	6	0.758621	0.603175	0.215291	0.146147	-0.0500391	0.0419053	0.0986765	0.548885	0.313557	1.0902	0.257278	0.595098	0.400834	1.36035	1.28249	0.687832	0.334863	0.455748	0.214336	1.36999	0.37821	1.2741	0.682048	0.595195
	9	0.59961	0.424928	0.259511	0.227105	0.000707859	0.0752131	0.103171	0.434861	0.342559	1.12814	0.30739	0.567419	0.454399	1.34088	1.14979	0.593628	0.520307	0.469914	0.262192	1.08238	0.38364	1.26257	0.84627	0.55991
	12	0.550048	0.621624	0.201273	0.240206	0.0271024	0.0519621	0.0908292	0.392842	0.349861	1.10045	0.394555	0.552968	0.359377	0.764043	1.19546	0.499138	0.517549	0.45929	0.274297	0.929433	0.359316	1.0795	0.787906	0.420592
	15	0.599011	0.657155	0.17593	0.240809	0.0152899	0.0556563	0.113601	0.33826	0.409182	1.15566	0.252204	0.672422	0.278312	0.994252	1.21369	0.468808	0.540235	0.419337	0.276441	0.900881	0.333479	1.11183	0.67606	0.493529
	18	0.521895	0.605558	0.331508	0.200888	0.0475945	0.0653794	0.0753761	0.552186	0.306009	1.15522	0.246944	0.575837	0.210595	1.07096	1.23308	0.368967	0.513406	0.410714	0.267875	0.957399	0.283974	1.07426	0.651022	0.384628
	21	0.525323	0.488151	0.217659	0.135626	0.0550112	0.0850432	0.0750707	0.567883	0.35804	1.24514	0.283964	0.565399	0.212797	1.02507	1.2688	0.31674	0.51458	0.412896	0.236574	0.932209	0.247522	1.02961	0.619389	0.363334
	24	0.402604	0.428754	0.227285	0.113834	0.0596768	0.0783636	0.0760199	0.633779	0.397572	1.35355	0.260316	0.578016	0.189194	0.95032	1.25884	0.312468	0.505465	0.3942	0.21937	0.893461	0.246906	1.02359	0.573325	0.337693
	27	0.430296	0.445834	0.239561	0.212866	0.042323	0.0994622	0.0399443	0.68845	0.344927	1.39366	0.268386	0.530239	0.140819	0.883453	1.18301	0.28013	0.471188	0.387363	0.217607	0.873795	0.209584	1.02884	0.519579	0.311623
	30	0.463613	0.439812	0.201971	0.17915	0.0568414	0.0800138	0.0625999	0.726831	0.323367	1.41622	0.276965	0.651241	0.123471	0.81054	1.19269	0.264493	0.471743	0.373757	0.204877	0.900317	0.189202	1.0116	0.43734	0.261502
	33	0.390074	0.490695	0.248039	0.24081	0.120653	0.122987	0.061606	0.701403	0.361835	1.54145	0.247289	0.584965	0.0794901	0.76536	1.19309	0.249353	0.429213	0.368614	0.209274	0.848759	0.175597	0.993564	0.419621	0.236785
	36	0.394228	0.384091	0.197519	0.0611049	0.0435343	0.067546	0.0230687	0.728814	0.301937	1.49637	0.243451	0.608392	0.0514094	0.734448	1.16046	0.197063	0.41466	0.345712	0.193343	0.846752	0.148451	0.851325	0.392527	0.220588
	39	0.405145	0.330873	0.213517	0.1404	0.0724449	0.104803	0.0198876	0.783986	0.290829	1.45479	0.19774	0.578204	0.0501346	0.639021	1.12162	0.214574	0.371648	0.339034	0.175574	0.829996	0.169341	0.839948	0.36706	0.208763
	42	0.36158	0.32383	0.12766	0.121327	0.0251335	0.0953321	0.0221924	0.802568	0.404183	1.53256	0.186375	0.535907	0.0576046	0.612122	1.13295	0.186543	0.365013	0.32892	0.124731	0.869712	0.124173	0.860997	0.286629	0.19625
	45	0.370514	0.285468	0.149396	0.123179	0.075598	0.100239	0.0470607	0.686649	0.285915	1.60694	0.109372	0.580721	0.0379935	0.584714	1.09896	0.194543	0.331838	0.314076	0.119328	0.831765	0.134623	0.869974	0.266803	0.185611
	48	0.310337	0.286432	0.10458	0.214658	0.121323	0.0989655	0.00733567	0.602469	0.318675	1.66482	0.114686	0.549076	0.0305704	0.513223	1.08088	0.197421	0.320513	0.29467	0.11663	0.653811	0.121445	0.868974	0.221242	0.181322
	51	0.248278	0.233184	0.167453	0.164298	0.0907894	0.0698225	0.0303433	0.60654	0.343167	1.79921	0.146871	0.551312	0.0283887	0.516571	1.0832	0.173109	0.300483	0.27761	0.126601	0.660505	0.0868581	0.89955	0.208754	0.172163
	54	0.218619	0.259044	0.149749	0.131033	0.0789919	0.0839267	0.0431913	0.626977	0.269006	1.94305	0.148867	0.515674	0.0410486	0.476364	1.08263	0.181046	0.288156	0.269628	0.119038	0.645174	0.0859738	0.875733	0.171142	0.15559
	57	0.202991	0.22642	0.241512	0.21923	0.0957022	0.0586539	0.0180922	0.629598	0.289342	2.03929	0.173056	0.499137	0.0152847	0.415802	1.05927	0.174275	0.285552	0.252353	0.108071	0.61273	0.075459	0.873642	0.178276	0.155401
	60	0.301809	0.18014	0.112533	0.0476948	0.0791033	0.0629	0.0339958	0.661281	0.291026	1.96522	0.151845	0.4311	0.0467465	0.396599	0.953235	0.171179	0.25915	0.217193	0.10231	0.616177	0.0489265	0.823845	0.16476	0.150091
	63	0.304024	0.231273	0.234059	0.13513	0.0946597	0.0717561	0.024537	0.621399	0.267131	2.07097	0.123231	0.448613	0.0263178	0.364803	0.853599	0.149401	0.237306	0.205328	0.100303	0.59059	0.063779	0.851542	0.150825	0.148714
	66	0.17945	0.177777	0.0751045	0.140549	0.0833214	0.0605645	0.0201092	0.615568	0.313054	2.05875	0.0246048	0.440736	0.0418453	0.354668	0.885926	0.116745	0.231887	0.200862	0.105829	0.535615	0.0688279	0.84627	0.129741	0.145769
	69	0.2402	0.158066	0.0841295	0.0552824	0.11294	0.0695852	0.0255109	0.501334	0.25126	2.04943	0.0473036	0.414956	0.0266801	0.303966	0.909384	0.124809	0.226363	0.193956	0.0971084	0.554363	0.0639956	0.808995	0.116047	0.138417
	72	0.311918	0.244247	0.153586	0.16855	0.0974015	0.053565	0.0180853	0.588701	0.27256	2.03885	0.148891	0.469447	0.017345	0.265629	0.928777	0.120995	0.208614	0.186315	0.0946419	0.563519	0.0645505	0.808312	0.105729	0.140174
	75	0.271448	0.222264	0.180597	0.180169	0.105391	0.0842856	0.034649	0.560433	0.259609	2.01891	0.0652001	0.437132	0.0136484	0.205035	0.930314	0.132934	0.22021	0.179678	0.0964951	0.53324	0.0744558	0.777219	0.0811541	0.134594
	78	0.252268	0.157852	0.0540808	0.11679	0.106566	0.0855604	0.0342291	0.6177	0.272278	1.97414	0.029806	0.364654	0.0231169	0.20632	0.952071	0.117058	0.205414	0.180055	0.0975647	0.494447	0.0740161	0.779626	0.0656015	0.123569
	81	0.189201	0.25793	0.0044756	0.0961292	0.1366	0.0901627	0.0220396	0.526357	0.259739	1.95011	0.0698388	0.455691	0.0318881	0.197827	0.922083	0.113696	0.194135	0.170194	0.0854063	0.468246	0.0781401	0.738844	0.0694723	0.130777
	84	0.114193	0.143106	0.0767681	0.118059	0.137296	0.0709802	0.0182697	0.442513	0.192703	1.86119	0.0142085	0.490027	0.0161797	0.185902	0.908657	0.0936482	0.18991	0.164298	0.0907067	0.503742	0.0792607	0.710183	0.0537911	0.124298
	87	0.152768	0.167747	0.0584409	0.0833437	0.0880664	0.06772	0.00405751	0.40745	0.240559	1.83291	0.0487187	0.48128	0.0129047	0.170574	0.911201	0.102986	0.18879	0.151464	0.0790325	0.479398	0.0619633	0.713811	0.0891537	0.134466
	90	0.146929	0.1561	0.112776	0.12324	0.112734	0.0769982	0.00639087	0.369503	0.271093	1.80118	0.145481	0.461871	0.0192837	0.190749	0.87454	0.105674	0.178081	0.15279	0.0889343	0.481357	0.0588293	0.610114	0.0728569	0.122738
	93	0.147941	0.167096	0.172777	0.0681874	0.135927	0.046242	-0.0227621	0.474435	0.245635	1.75034	0.183692	0.431885	-0.00811967	0.163287	0.827036	0.111211	0.164448	0.140629	0.0820195	0.452522	0.0175011	0.543897	0.0763859	0.12307
	96	0.0699551	0.121308	0.100885	0.139378	0.122826	0.0560628	-0.018126	0.419605	0.141135	1.69854	0.0276914	0.457467	0.00868289	0.161816	0.837314	0.0906379	0.137351	0.122562	0.068214	0.380479	-0.0103648	0.532588	0.0730461	0.129733
	99	0.109352	0.132468	0.147037	0.0871776	0.122652	0.0429776	-0.0478989	0.403241	0.0411523	1.72258	0.000129104	0.404078	0.0301192	0.145825	0.825262	0.0939317	0.125069	0.117342	0.0652413	0.415437	-0.019433	0.509801	0.0799691	0.121564
	102	0.161955	0.125166	0.144901	0.078073	0.0687238	0.0343489	-0.00581823	0.335322	0.0865309	1.71044	0.157161	0.4569	0.0324621	0.112353	0.824703	0.0988334	0.130388	0.104591	0.0694184	0.390307	-0.014141	0.498274	0.0787546	0.10981
	105	0.128797	0.166543	0.118794	0.102608	0.101375	0.0483473	-0.0528957	0.374486	0.0826067	1.68195	0.04873	0.473393	0.0116585	0.142108	0.825989	0.0910638	0.112887	0.0989291	0.0711717	0.380577	-0.000174426	0.493515	0.0566996	0.103662
	108	0.0879101	0.189073	0.126198	0.116341	0.0843531	0.0164749	-0.0597295	0.376741	0.192089	1.62455	-0.0715406	0.42642	0.0205394	0.137854	0.826983	0.0993499	0.108225	0.090189	0.0556702	0.402405	0.000739934	0.468662	0.0643551	0.100294
	111	0.141394	0.0644758	0.118557	0.114932	0.12697	0.010322	-0.0470278	0.399199	0.177221	1.55372	-0.0127251	0.386447	0.0112543	0.105418	0.783628	0.0916596	0.115883	0.087526	0.0551838	0.362198	0.0217687	0.436569	0.054235	0.10403
	114	0.160865	0.0546052	0.0678662	0.0694112	0.0955183	0.0007233	-0.0617008	0.373668	0.169623	1.49244	0.0403227	0.347702	-0.0117682	0.0938898	0.730916	0.080786	0.105047	0.0792254	0.0432301	0.340374	0.0374795	0.414038	0.0557809	0.10048
	117	0.189806	0.0184366	0.166449	0.0759643	0.10256	0.00599058	-0.0517041	0.373287	0.196212	1.51115	0.017704	0.458436	-0.0048473	0.103676	0.734036	0.0941991	0.0973586	0.0713858	0.0360469	0.296561	0.0516999	0.366485	0.0603102	0.0991169
	120	0.112088	0.0145695	0.0929511	0.104368	0.0755927	0.000120381	-0.0541919	0.30649	0.209475	1.4731	-0.00767713	0.443202	-0.0159936	0.0823533	0.718874	0.0929482	0.0922496	0.0702345	0.0504132	0.333559	0.0691673	0.386647	0.0496722	0.110666
	123	0.15568	0.0507379	0.104411	0.126985	0.0428986	-0.00956294	-0.0680252	0.183542	0.0511497	1.36087	0.0109172	0.404773	-0.0213561	0.111002	0.733837	0.090135	0.0797458	0.0650572	0.042939	0.276023	0.0527145	0.346141	0.0551499	0.0970027
	126	0.211584	0.0257341	0.00312761	0.123997	0.0419392	0.00130326	-0.0431944	0.220553	0.21168	1.36346	0.0142259	0.382256	-0.0215025	0.0802507	0.711493	0.0736216	0.076459	0.0559778	0.0457797	0.30261	0.0660675	0.282814	0.0459791	0.104222
	129	0.148304	0.0716425	-0.0619762	-0.0250208	0.0394042	-0.00538935	-0.0473863	0.104763	0.121275	1.31072	-0.001665	0.403093	-0.0337638	0.0789306	0.713717	0.0673347	0.0687688	0.0532629	0.0327011	0.283354	0.048499	0.316736	0.049882	0.102214
	132	0.206512	0.113025	0.0420247	-0.0161766	0.107055	-0.0112561	-0.0577658	-0.0494681	0.124603	1.31524	-0.0776622	0.418094	-0.0115126	0.0808955	0.712421	0.0743778	0.0610413	0.0488512	0.0403671	0.225794	0.0458076	0.250079	0.0385723	0.0919275
	135	0.19939	0.0527804	0.129235	0.0379594	0.122379	-0.0160092	-0.0732835	-0.113841	0.155108	1.25384	0.104677	0.407929	-0.00681188	0.0740787	0.698021	0.0876163	0.0650811	0.0486663	0.0309178	0.187908	0.0561554	0.275699	0.030578	0.0918483
	138	0.210655	0.0481385	0.0482402	0.0238377	0.0485795	0.0209224	-0.0489685	-0.0758179	0.1623	1.25293	0.0313606	0.381053	-0.00182713	0.0918131	0.682927	0.0784546	0.0610438	0.0436276	0.0290994	0.22722	0.0537677	0.25519	0.0347956	0.103282
	141	0.184019	-0.0548354	0.0265591	0.0182516	0.0882632	-0.00345274	-0.0738508	-0.077168	0.171535	1.24829	-0.0209116	0.378685	0.00477251	0.061573	0.681395	0.0824547	0.0464824	0.0339555	0.0244804	0.182397	0.0534087	0.268503	0.0308069	0.0951003
	144	0.167186	-0.0182719	0.0940246	0.00988534	0.0651208	-0.0118652	-0.066396	-0.142447	0.168829	1.15468	-0.0825857	0.440272	-0.000544542	0.052701	0.66856	0.0758259	0.0499377	0.0262513	0.0304239	0.185817	0.0450996	0.249138	0.0302644	0.0994742
	147	0.168973	0.0377161	0.0848415	0.0297989	0.0832444	-0.010232	-0.0747422	-0.198334	0.160953	1.16477	-0.112746	0.339431	0.00381175	0.0546667	0.668564	0.0906174	0.0496116	0.0307892	0.0309484	0.173904	0.0482488	0.259255	0.0210179	0.104639
	150	0.169158	-0.0624294	0.0589531	0.0544812	0.0404344	0.00097768	-0.0502534	-0.143431	0.217309	1.19044	-0.00689986	0.399335	-0.020805	0.0722171	0.66877	0.0812456	0.0400765	0.0263696	0.0279441	0.200783	0.0570272	0.251926	0.020177	0.0964891
	153	0.133499	-0.0207987	0.0226985	0.0657453	0.0773815	0.00316337	-0.0654777	-0.203588	0.167781	1.14112	-0.0383517	0.447281	-0.00122583	0.056473	0.674422	0.0741233	0.0444705	0.0277904	0.0193247	0.175881	0.0591157	0.239317	0.0201503	0.0937481
	156	0.182262	0.0228599	0.0802317	0.0535257	0.0692009	-0.0173257	-0.0748615	-0.263236	0.137203	1.15142	0.0357276	0.391633	-0.0144917	0.0795395	0.665714	0.0547943	0.0309805	0.0248814	0.0285492	0.178022	0.0677522	0.24893	0.00694442	0.0990118
	159	0.157914	0.00434524	0.124983	0.0218162	0.0342826	-0.0250293	-0.0418411	-0.205251	0.180636	1.07495	-0.0391167	0.286858	-0.00889924	0.0862078	0.646184	0.0779196	0.0335936	0.0202072	0.0259965	0.189706	0.0550745	0.193466	0.0256393	0.0902482
	162	0.163216	-0.0106374	0.118499	0.0879103	0.0447621	-0.00580659	-0.0535126	-0.269594	0.14674	1.12435	-0.040779	0.37165	-0.0274974	0.0817536	0.635777	0.0714099	0.0334428	0.0236144	0.0193521	0.213795	0.0472222	0.227402	0.0138639	0.0831793
	165	0.190658	0.0599216	0.136934	0.0369062	0.0338039	-0.0229658	-0.066329	-0.273274	0.130512	1.06561	-0.0685722	0.340984	-0.0165143	0.0799742	0.582128	0.0518085	0.0310199	0.0258342	0.0028635	0.210382	0.0624482	0.222821	0.0280898	0.0966345
	168	0.110813	0.0154961	0.0165229	0.00918221	0.0711697	-0.0195229	-0.0635197	-0.269605	0.185767	1.03277	-0.183624	0.373634	-0.0216451	0.069019	0.564456	0.0617368	0.0255854	0.0233144	0.0123142	0.224691	0.0504749	0.211896	0.0219826	0.0929836
	171	0.137383	0.047045	-0.0583815	0.117972	0.0276794	-0.0193598	-0.0519723	-0.305955	0.122968	0.99498	-0.00228162	0.407526	-0.0428609	0.0513799	0.585552	0.0520582	0.0223834	0.0244928	0.00987725	0.221729	0.0485822	0.198844	0.0252928	0.0934847
	174	0.168493	0.0464589	0.0115632	-0.0400059	-0.00710678	-0.00133225	-0.0398473	-0.353081	0.19794	0.937206	-0.0659575	0.318654	-0.0185917	0.0432442	0.58326	0.0681007	0.0137682	0.0273718	0.0117587	0.240518	0.0492473	0.225633	0.00739904	0.0959674
	177	0.131744	0.00513922	0.0391794	0.0344107	0.0571176	-0.0114108	-0.0967984	-0.265263	0.0878368	0.937801	-0.106526	0.238881	0.000297851	0.0517715	0.562626	0.0648752	0.0148155	0.0339403	0.00833164	0.184883	0.0454393	0.2208	0.0141505	0.0920903
	180	0.158411	-0.0551081	0.0728745	0.0847926	0.00725394	-0.0186448	-0.0803277	-0.302715	0.164175	0.89163	-0.0225165	0.252361	-0.0211275	0.0464768	0.564043	0.0617327	0.0256877	0.0302087	0.0117186	0.170184	0.0428578	0.162517	0.0210438	0.0965431

## Sheet: FigureS2L
Figure S2L
	Fluorescence versus time
	Time (s)	W413G-SH3-GFP																PM
	0	0.328438	0.0981459	0.338656	0.492137	0.609681	0.493835	0.253733	0.302574	0.148469	0.728271	0.639306	0.502277	0.377699	0.284602	0.331705	0.257014	0.566553	0.432115	1.07646	0.969073	1.57171	0.725339	1.20782	1.31845	0.80129	2.06277	1.0536	0.936645	1.11633	0.53806	0.794701	0.614933
	3	0.351577	0.0924411	0.407041	0.548443	0.518143	0.537878	0.191769	0.29099	0.156254	0.582446	0.75048	0.565241	0.3083	0.320665	0.285924	0.340175	0.574001	0.417174	1.26027	0.913963	0.920975	0.605059	0.859907	0.86964	0.736504	1.5105	1.32009	0.95431	0.590564	1.0277	0.526738	0.708093
	6	0.335775	0.0712333	0.322249	0.525719	0.556368	0.651479	0.296051	0.273416	0.163793	0.628888	0.712103	0.574191	0.357407	0.394581	0.376559	0.299675	0.595331	0.252872	0.907642	0.872823	1.24254	1.02434	0.937694	0.923855	0.824458	1.74673	1.49731	0.756826	0.512575	1.10245	0.621425	0.85465
	9	0.381546	0.0519017	0.3256	0.575095	0.678015	0.778894	0.192519	0.302121	0.188034	0.634205	0.911348	0.677418	0.204278	0.38359	0.359912	0.344288	0.556731	0.211372	0.656517	0.978788	1.22323	0.998209	0.966169	0.936915	0.884371	0.979877	1.11616	1.22592	0.516783	1.04246	0.565497	0.953846
	12	0.433596	0.0672044	0.435024	0.590361	0.660963	0.825765	0.268141	0.33657	0.17284	0.707175	1.04574	0.616967	0.65315	0.399273	0.306428	0.275718	0.559102	0.186447	0.9966	0.815535	1.23958	0.92602	0.923676	0.912855	0.827576	1.46371	1.66841	1.11857	1.74488	1.04065	0.630169	0.848052
	15	0.433338	0.032213	0.395005	0.580344	0.666352	0.827143	0.290668	0.295809	0.203811	0.704172	1.06707	0.550508	0.630163	0.377825	0.275761	0.309275	0.479553	0.161789	0.949563	0.789187	1.2193	0.873195	0.845169	0.759789	0.767736	1.20228	1.65955	0.957017	1.95202	1.04443	0.506129	0.794267
	18	0.482051	0.049319	0.454904	0.572704	0.552132	0.894092	0.251059	0.241325	0.187698	0.7262	1.15318	0.644464	0.643842	0.479541	0.388075	0.272187	0.511451	0.116927	1.1045	0.717718	1.07019	0.904731	0.767245	0.697815	0.708095	1.26899	1.84195	1.02549	1.60279	1.06177	0.469991	0.838323
	21	0.39994	0.051573	0.399807	0.511391	0.638768	0.926219	0.240696	0.231919	0.172127	0.759522	1.02097	0.619582	0.64986	0.468733	0.294951	0.269281	0.466041	0.134251	1.09749	0.647034	1.06759	0.910187	0.70881	0.673017	0.724841	0.972293	1.54882	1.1226	1.60857	1.09195	0.458169	0.730906
	24	0.427393	0.0245486	0.409289	0.600557	0.593371	0.918008	0.170488	0.218138	0.169721	0.738338	1.07484	0.651045	0.725486	0.340851	0.314299	0.301984	0.394581	0.112181	1.02288	0.576972	1.06541	0.899827	0.585353	0.527452	0.662562	1.14213	1.47943	1.18777	1.54323	0.948525	0.389059	0.70887
	27	0.411328	0.0454116	0.440009	0.608271	0.530868	0.906241	0.246416	0.188615	0.205402	0.75831	1.13818	0.625333	0.449643	0.406801	0.304905	0.320971	0.357232	0.089256	0.896688	0.544161	1.04787	0.895936	0.531038	0.480466	0.637986	1.06054	1.59052	1.19776	1.6101	0.887692	0.309777	0.692693
	30	0.450553	0.0100121	0.4351	0.59346	0.680001	0.938836	0.240418	0.240076	0.20906	0.636617	1.26237	0.625875	0.615304	0.274708	0.274089	0.287045	0.363865	0.0763058	1.04059	0.494196	1.00772	0.866344	0.469482	0.394198	0.644619	1.02998	1.69838	1.03501	1.2294	0.900983	0.29441	0.72957
	33	0.384771	0.0250783	0.46495	0.515611	0.688656	0.954356	0.205594	0.116641	0.189906	0.795877	1.2652	0.552159	0.628113	0.418344	0.232347	0.29743	0.342039	0.0641653	0.791381	0.439314	1.00238	0.817123	0.358009	0.295848	0.596041	0.987217	1.69616	1.02235	0.851972	0.920552	0.281662	0.767176
	36	0.344499	-0.00597023	0.501774	0.562875	0.554986	0.913024	0.155295	0.10476	0.226732	0.794806	1.28965	0.611483	0.670188	0.401375	0.297932	0.330285	0.315354	0.0526084	0.824107	0.372065	0.966667	0.77596	0.272042	0.238884	0.595794	0.961248	1.78021	1.05247	0.882499	0.945541	0.263145	0.792792
	39	0.345703	0.0175849	0.497117	0.518486	0.593605	0.905102	0.1323	0.148067	0.218267	0.608477	1.16121	0.639958	0.623374	0.327806	0.273376	0.286167	0.283924	0.0485022	0.878567	0.328957	0.939538	0.723442	0.270488	0.151851	0.543211	0.842541	1.42103	1.01701	0.889571	0.95584	0.240065	0.705539
	42	0.311983	0.0449	0.470326	0.46152	0.585147	0.842136	0.115333	0.168638	0.194166	0.767336	1.18214	0.655339	0.646705	0.371338	0.266771	0.306025	0.274266	0.0506672	0.753781	0.325392	0.913322	0.601098	0.279387	0.126848	0.517923	0.804002	1.45122	1.0068	0.921061	0.98037	0.226972	0.718699
	45	0.319681	-0.00410082	0.452474	0.46859	0.573266	0.721043	0.188434	0.123847	0.179406	0.473564	1.17563	0.626359	0.671423	0.459296	0.269581	0.310141	0.230972	0.0531473	0.857161	0.252917	0.859697	0.561879	0.239513	0.131264	0.466242	0.742887	1.45001	0.987813	0.852049	0.940236	0.226029	0.751919
	48	0.219401	0.00415147	0.450257	0.517277	0.538912	0.782504	0.163206	0.0764649	0.177091	0.568302	1.08045	0.596659	0.58653	0.451001	0.28293	0.282519	0.220513	0.0512904	0.716505	0.286757	0.858632	0.526273	0.214076	0.0981515	0.424727	0.661871	1.44118	0.881214	0.800024	0.954188	0.217605	0.748244
	51	0.29732	0.0518748	0.469955	0.521577	0.448863	0.800849	0.175377	0.0098174	0.204794	0.60145	1.1039	0.623499	0.55038	0.438177	0.279204	0.236407	0.183295	0.0386399	0.877336	0.275098	0.652898	0.51382	0.178137	0.0874316	0.411098	0.614042	1.25636	0.875753	0.79515	0.786175	0.180806	0.717455
	54	0.249727	0.0137435	0.410192	0.575542	0.533247	0.623192	0.0944791	0.0367272	0.171038	0.660667	0.993633	0.545494	0.583812	0.455351	0.283679	0.222594	0.149754	0.0419172	0.884452	0.262116	0.648924	0.47964	0.145387	0.0702336	0.427804	0.552191	1.15383	0.85876	0.607027	0.796196	0.173583	0.656801
	57	0.270137	-0.00699127	0.373344	0.533734	0.526041	0.670076	0.118948	-0.0486498	0.14033	0.512929	1.00948	0.604701	0.481956	0.364069	0.278918	0.238626	0.135827	0.0382035	0.764828	0.247998	0.625952	0.446619	0.123094	0.0528668	0.367368	0.514386	1.14599	0.83375	0.54399	0.817702	0.165588	0.633202
	60	0.143567	0.034735	0.387854	0.562464	0.479544	0.557501	0.0896421	-0.0276719	0.122613	0.590804	0.914846	0.563845	0.505206	0.42998	0.219497	0.244331	0.118786	0.0309258	0.77356	0.247118	0.562059	0.40913	0.105725	0.0615702	0.324117	0.461877	1.1685	0.776867	0.392904	0.821085	0.143448	0.541405
	63	0.161877	0.0112021	0.365282	0.545581	0.446483	0.611896	0.106259	-0.0141566	0.163103	0.505005	1.01989	0.585972	0.412795	0.508784	0.264696	0.274554	0.100145	0.0328126	0.628918	0.230069	0.600186	0.384725	0.0922747	0.051762	0.317623	0.376615	1.17609	0.758934	0.30014	0.835514	0.114688	0.521899
	66	0.126564	0.0273415	0.323263	0.529893	0.436298	0.575362	0.058996	-0.105211	0.128731	0.486985	1.07625	0.567639	0.341239	0.472772	0.23242	0.244246	0.108167	0.029435	0.529855	0.214609	0.613829	0.328484	0.0682812	0.0281799	0.311121	0.271977	1.14636	0.772456	0.28769	0.835372	0.0977696	0.554983
	69	0.103807	0.020097	0.362836	0.493756	0.424701	0.51792	0.0584156	0.00737633	0.130211	0.469453	1.08726	0.599496	0.401501	0.400105	0.188468	0.233135	0.100885	0.0325604	0.472406	0.190415	0.621035	0.313069	0.0542922	0.0478181	0.303839	0.272143	1.13511	0.788263	0.291093	0.860483	0.0993492	0.546243
	72	0.130764	0.00397637	0.408639	0.484197	0.405511	0.499872	0.0321332	-0.0487119	0.126072	0.533281	0.980991	0.564038	0.406317	0.482379	0.202051	0.271261	0.103082	0.0287854	0.52714	0.159749	0.627807	0.290719	0.0472262	0.0517943	0.285639	0.201307	1.11831	0.782351	0.280573	0.849788	0.0895763	0.555758
	75	0.140422	0.00396553	0.413497	0.483429	0.459637	0.487905	0.100636	0.00354043	0.138247	0.339069	1.0239	0.555262	0.444451	0.400434	0.180107	0.190026	0.107416	0.0200032	0.540693	0.140018	0.541767	0.272394	0.032879	0.0618514	0.276137	0.171843	1.11437	0.77241	0.294217	0.824239	0.0936318	0.543912
	78	0.162514	-0.0219917	0.465867	0.472713	0.420919	0.466801	0.125306	-0.0850866	0.0925685	0.365543	1.00545	0.513315	0.37046	0.491372	0.205861	0.211345	0.106804	0.00436395	0.542521	0.14496	0.541576	0.246366	0.04021	0.041683	0.236496	0.118995	1.08626	0.754073	0.233713	0.815654	0.101305	0.538461
	81	0.17315	-0.0208481	0.425098	0.46894	0.423687	0.41552	0.0950403	0.0394507	0.105631	0.306025	0.937943	0.506901	0.428748	0.441356	0.20255	0.214983	0.105673	0.00603657	0.547509	0.131362	0.529553	0.225059	0.049417	0.0481042	0.234614	0.0695231	1.03599	0.7303	0.254276	0.806352	0.0993941	0.522281
	84	0.144173	-0.0128152	0.445299	0.443623	0.391296	0.331606	0.114945	-0.0244106	0.0657462	0.411382	0.834701	0.501989	0.405173	0.516052	0.204265	0.196294	0.110252	0.00929455	0.557757	0.118045	0.53686	0.208517	0.018049	0.0691746	0.222032	0.102502	1.00666	0.663039	0.218436	0.779466	0.0792966	0.49122
	87	0.172072	-0.0476271	0.42094	0.437396	0.540852	0.414549	0.0926624	-0.0591946	0.120165	0.43039	0.720226	0.444228	0.378627	0.435169	0.208318	0.210597	0.107606	0.00778935	0.471447	0.117243	0.522536	0.185289	0.0319421	0.0574966	0.226395	0.0801953	0.794516	0.480551	0.192618	0.772207	0.0788602	0.493569
	90	0.0972576	-0.0320622	0.438972	0.420863	0.446155	0.360545	0.0355846	0.0219786	0.0808229	0.437422	0.769769	0.430912	0.431387	0.375307	0.154936	0.190069	0.105308	0.0133959	0.457559	0.0985253	0.469251	0.163871	0.023992	0.066758	0.201861	0.0800829	0.72884	0.429511	0.16616	0.75516	0.0931651	0.461811
	93	0.114654	-0.0439781	0.383863	0.439881	0.444761	0.316375	0.198847	-0.0214354	0.0696047	0.369988	0.827847	0.415705	0.478319	0.322681	0.159153	0.164576	0.123172	0.0184753	0.409697	0.0982257	0.46173	0.155131	0.0225486	0.0556449	0.189331	0.0367626	0.731616	0.424147	0.130502	0.755601	0.0901336	0.448597
	96	0.0759582	-0.030951	0.394185	0.388131	0.395743	0.348215	0.0263829	0.0498991	0.0521105	0.191814	0.778474	0.421861	0.398505	0.37953	0.201331	0.172593	0.114201	0.00923506	0.484738	0.0848444	0.494773	0.127797	0.0360668	0.0560156	0.151426	0.0842919	0.730814	0.426113	0.137087	0.744971	0.0956003	0.436513
	99	0.107107	-0.0234558	0.375388	0.425098	0.466567	0.319473	0.0868897	-0.052466	0.103378	0.424952	0.823005	0.419002	0.291203	0.371106	0.200053	0.115174	0.1161	0.011846	0.397129	0.0703967	0.437124	0.130122	0.0291344	0.0478586	0.14307	0.0570213	0.734792	0.422012	0.141953	0.743283	0.0845725	0.392004
	102	0.184095	-0.0400286	0.310585	0.392586	0.459287	0.364436	0.00232554	-0.0763419	0.0863868	0.349931	0.69606	0.396811	0.365483	0.39393	0.14534	0.152741	0.168071	0.010095	0.358168	0.0656486	0.423049	0.126466	0.0386748	0.0595467	0.134635	0.0462561	0.702915	0.413463	0.0723068	0.72874	0.0914285	0.388745
	105	0.213157	0.00398905	0.299035	0.394793	0.561783	0.196849	0.154691	-0.0464113	0.0751171	0.395655	0.72943	0.379371	0.275739	0.328102	0.132802	0.123897	0.208201	0.00682216	0.385358	0.0805827	0.417602	0.116574	0.0221201	0.0633402	0.122527	0.0282383	0.712511	0.405361	0.0746321	0.733122	0.0833444	0.386513
	108	0.263866	-0.0497934	0.318024	0.396375	0.509013	0.270619	0.0909017	-0.0700522	0.0790984	0.299355	0.692744	0.339816	0.233959	0.295736	0.161173	0.123998	0.238291	0.00612151	0.391157	0.0743741	0.393372	0.124334	0.0349942	0.0623707	0.122271	0.0779575	0.716895	0.244972	0.0901563	0.712099	0.0843196	0.371203
	111	0.270427	-0.045402	0.291122	0.443093	0.353784	0.28935	0.0787304	-0.0198291	0.0629573	0.305172	0.810829	0.349034	0.270364	0.478163	0.161934	0.133131	0.244641	0.00391159	0.341717	0.0695072	0.396466	0.126117	0.0183085	0.0583838	0.0979991	0.0658976	0.712308	0.293524	0.0740803	0.622748	0.0850868	0.332903
	114	0.202581	-0.0250964	0.292303	0.451931	0.431631	0.249651	0.0799623	-0.0254499	0.091351	0.404024	0.756005	0.347303	0.329657	0.311638	0.146982	0.0969491	0.234011	0.00531666	0.264796	0.0606467	0.447641	0.111827	0.017312	0.076129	0.0932002	0.0601664	0.711597	0.294902	0.0496098	0.61198	0.0826289	0.339962
	117	0.219019	-0.0233576	0.284438	0.399508	0.466327	0.284907	0.113166	-0.0598485	0.0680982	0.257781	0.770873	0.407802	0.24108	0.304569	0.186165	0.125356	0.237284	0.0078784	0.300002	0.0538412	0.42564	0.125521	0.0315875	0.065132	0.108649	0.0535603	0.660274	0.288763	0.0556073	0.593906	0.0972158	0.309784
	120	0.214039	-0.0594053	0.272803	0.393989	0.432465	0.263881	0.0836649	0.0136964	0.0938437	0.442782	0.749152	0.35042	0.24743	0.261252	0.176445	0.114595	0.222735	0.00399438	0.291401	0.0509899	0.432171	0.109038	0.0304404	0.0291158	0.0822802	0.094696	0.673269	0.290269	0.051812	0.586993	0.0944955	0.297109
	123	0.224165	-0.0541854	0.268716	0.411688	0.317043	0.205081	0.0747432	-0.0366303	0.0717814	0.294546	0.731607	0.3668	0.256075	0.387879	0.178221	0.160179	0.221591	0.00830568	0.290678	0.0527678	0.393515	0.104149	0.0134638	0.0421125	0.0931903	0.0631076	0.666483	0.300111	0.037313	0.561534	0.0947393	0.295503
	126	0.183443	-0.0322064	0.285281	0.422964	0.437324	0.357195	0.0833061	-0.0378977	0.0478024	0.421335	0.761906	0.390481	0.245905	0.36919	0.229325	0.0883211	0.23232	0.00150099	0.268941	0.0494017	0.396127	0.107681	0.018106	0.0732777	0.101215	0.0148125	0.642267	0.299776	0.0191653	0.540936	0.0960664	0.280741
	129	0.198653	-0.00680486	0.291313	0.400254	0.575804	0.257685	0.0464949	-0.085902	0.0602633	0.349381	0.761323	0.311967	0.213678	0.305628	0.176059	0.125226	0.228952	0.00150837	0.238034	0.0624238	0.377316	0.0999634	0.00493913	0.0517181	0.111787	0.060967	0.630617	0.305642	0.0420467	0.542528	0.0776641	0.275646
	132	0.174865	-0.0696693	0.242479	0.420318	0.383649	0.238866	0.066477	-0.0851975	0.0591614	0.362522	0.709806	0.398541	0.34578	0.361126	0.124624	0.141655	0.216939	0.000375257	0.22501	0.0467797	0.361926	0.100661	0.00707295	0.057957	0.0825037	0.092437	0.646162	0.289747	0.0340256	0.497136	0.0734707	0.285863
	135	0.239015	-0.0573274	0.258623	0.374616	0.351242	0.271229	0.0454371	-0.0673622	0.101727	0.298153	0.682726	0.388692	0.193619	0.311598	0.221524	0.145399	0.227073	0.00778787	0.230273	0.0423397	0.355791	0.112058	0.0276262	0.0642155	0.0626791	0.08747	0.588395	0.284074	0.0403067	0.472531	0.0900832	0.280297
	138	0.258345	-0.045076	0.26199	0.354502	0.425243	0.229077	0.0810016	-0.0287663	0.0451464	0.33847	0.74452	0.37314	0.243084	0.330017	0.217172	0.128225	0.223553	0.000176609	0.226842	0.0541974	0.364076	0.153515	0.0040539	0.0663259	0.0545957	0.052343	0.564758	0.25209	0.0508484	0.459805	0.0727096	0.275198
	141	0.287754	-0.0150708	0.267924	0.390545	0.284604	0.219552	0.0845537	-0.0319771	0.0586031	0.375589	0.690722	0.377405	0.283014	0.411991	0.148963	0.125846	0.211028	-0.00299633	0.20344	0.0426477	0.365471	0.118235	0.0159665	0.0605731	0.0521493	0.0801093	0.572587	0.211346	0.0483543	0.457303	0.0804474	0.253593
	144	0.276133	-0.0747906	0.275548	0.374174	0.357928	0.263047	0.108487	-0.0682486	0.0744646	0.3372	0.66659	0.408393	0.130025	0.291519	0.172141	0.0477215	0.175907	0.0064765	0.162671	0.047674	0.361881	0.0979408	0.0413141	0.0470383	0.0490253	0.0700593	0.567727	0.292236	0.0511696	0.443278	0.0723037	0.238162
	147	0.227286	-0.0856471	0.265299	0.388379	0.405795	0.264152	-0.0327033	-0.0356672	0.0754066	0.28534	0.559846	0.37764	0.133099	0.143139	0.195508	0.110545	0.15154	0.000786076	0.138265	0.0482764	0.317218	0.108738	0.0135554	0.0557883	0.0577495	0.0666916	0.542532	0.293904	0.0431167	0.442857	0.0724997	0.2114
	150	0.264698	-0.0209947	0.258248	0.402217	0.464249	0.26013	0.0329319	-0.0158205	0.0876496	0.348235	0.594563	0.353111	0.086068	0.228144	0.204654	0.0506127	0.133201	0.00923319	0.147113	0.0411229	0.265013	0.0985203	0.0237049	0.0837012	0.0514717	0.0355272	0.506967	0.228325	0.0402814	0.410314	0.0766217	0.214702
	153	0.254966	-0.0228301	0.304897	0.379133	0.464599	0.202281	-0.0105765	0.00599994	0.0700681	0.408854	0.627702	0.396637	0.0440151	0.227373	0.160789	0.106178	0.128557	-0.00748549	0.164656	0.048666	0.285393	0.0929827	0.0418087	0.0618398	0.0448755	0.0734923	0.47752	0.219717	0.058606	0.409863	0.0782234	0.225992
	156	0.296908	-0.0664392	0.269785	0.393643	0.394063	0.183376	0.0347444	-0.0012023	0.0621063	0.383176	0.459809	0.364899	0.13116	0.228046	0.180484	0.141237	0.133132	-0.000581318	0.178868	0.0525629	0.27145	0.0660286	0.0137114	0.061398	0.0513022	0.0535633	0.458302	0.214468	0.0496943	0.377706	0.0746487	0.204037
	159	0.288408	-0.0270619	0.28583	0.38763	0.334993	0.230907	0.046273	0.00915371	0.066136	0.382345	0.497054	0.398382	0.156214	0.206056	0.168516	0.0669488	0.12011	-0.00432978	0.153881	0.0593019	0.260179	0.0841592	0.0102302	0.055778	0.0497591	0.0552025	0.415362	0.211383	0.0313156	0.359943	0.0822183	0.206134
	162	0.276751	-0.0246605	0.296306	0.399205	0.362072	0.242374	0.05473	0.0442128	0.0454022	0.33983	0.494343	0.381532	0.0972755	0.312859	0.174369	0.0613363	0.118732	-0.00351034	0.130744	0.0535392	0.279828	0.0811535	0.0340737	0.0616647	0.0451736	0.0637254	0.409178	0.20555	0.0280969	0.333713	0.0846292	0.200957
	165	0.252359	-0.0661197	0.2802	0.402057	0.387054	0.275346	0.0354297	-0.0118973	0.0663295	0.207132	0.459811	0.323158	0.157295	0.24414	0.172276	0.126408	0.100352	-0.00595578	0.158812	0.0471698	0.271069	0.0960724	0.019706	0.0813045	0.0585785	0.116841	0.384506	0.178957	0.0402367	0.319227	0.0890841	0.198965
	168	0.246035	-0.0891335	0.310246	0.386793	0.422815	0.225549	0.134244	0.00216998	0.0520506	0.311277	0.431036	0.36151	0.0994683	0.245921	0.120568	0.13274	0.0886302	0.00405118	0.161622	0.051787	0.230538	0.0809369	0.0280991	0.0518831	0.0601811	0.0614418	0.386012	0.158539	-0.00222092	0.302319	0.0829389	0.192228
	171	0.180759	-0.110278	0.263804	0.398807	0.442833	0.208213	0.0481689	0.00928778	0.048981	0.34565	0.43231	0.368873	0.0764412	0.190068	0.203912	0.114809	0.0905824	-0.00422579	0.188973	0.0510031	0.231045	0.0749549	0.0123677	0.0565787	0.0560472	0.0881076	0.366161	0.147364	0.0242676	0.289162	0.0840776	0.186273
	174	0.227541	-0.0805609	0.280353	0.406982	0.339441	0.220251	-0.0854475	-0.0246672	0.0592721	0.598077	0.401377	0.320103	0.17604	0.149871	0.140243	0.116385	0.087158	0.00060479	0.163484	0.0488554	0.227919	0.0694484	-0.00157135	0.066161	0.0610078	0.111402	0.364722	0.13719	0.0247922	0.267043	0.0758606	0.178166
	177	0.210662	-0.0506952	0.311539	0.41899	0.4665	0.167144	0.0251631	0.0506402	0.0462633	0.314326	0.419239	0.356257	0.0719138	0.180237	0.121133	0.0721293	0.0566149	-0.00336582	0.167406	0.0513006	0.234398	0.0574021	-0.00401141	0.0849466	0.0410625	0.0567468	0.334555	0.151132	0.0414429	0.248146	0.0592161	0.176755
	180	0.267972	-0.0703974	0.31093	0.36881	0.499698	0.314295	-0.013269	0.0492196	0.0577422	0.42402	0.361355	0.341322	0.183368	0.0699794	0.142554	0.089312	0.069274	-0.0135102	0.208496	0.0411477	0.26876	0.0489861	0.0200103	0.0763371	0.0494998	0.0510947	0.318916	0.156547	0.0184491	0.244732	0.064081	0.149002
