# Supplementary material for: A mechanosensing mechanism controls plasma membrane shape homeostasis at the nanoscale
Source: eLife. 2023 Sep 25;12:e72316. doi: 10.7554/eLife.72316 (PMC10569792; doi:10.7554/eLife.72316)
Supplement: Figure 3—figure supplement 2—source data 1. [file elife-72316-fig3-figsupp2-data1.xlsx]

## Sheet: FigureS3B
Figure S3B
	Fluorescence versus time
	Time (s)	IRSp53-/-R IRSp53
	0	0.540632	0.457145	1.16411	0.751506	0.785454	0.196969	0.392681	0.558711	0.62887	0.459667	0.711222	1.05607	1.63843	0.478442	0.801629	0.766582	0.770099	1.7036	0.855151	0.709041	-0.0525439	0.629503	1.56059	1.84393	1.85254	1.35352	2.14427	1.68153	1.01266	2.0372	0.985039	1.24502	1.19215	2.14446	0.724556	2.11933	2.35569	0.92279	0.684891	1.21289	1.29522	0.295049	0.620188	0.558738	1.31554	0.062846	0.520729	0.559538
	3	0.522168	0.421895	1.07414	0.776716	0.659167	0.186212	0.379874	0.512609	0.660285	0.542371	0.655175	0.888061	1.40311	0.357417	0.677765	0.532424	0.998163	1.86598	1.17168	0.842344	0.216439	0.827909	1.33885	1.40549	1.09713	1.09924	1.44486	1.98004	0.954419	1.56502	0.756713	1.01076	1.24733	1.85834	0.78337	1.78154	1.55351	0.720707	0.582391	1.09291	0.968244	0.350498	0.612885	0.482193	1.0231	0.0416376	0.62242	0.599788
	6	0.478742	0.32082	0.87911	0.765352	0.686645	0.109691	0.33778	0.380594	0.617368	0.541434	0.600091	0.991052	1.53397	0.273029	0.52764	0.235888	0.935244	1.06454	1.14031	0.693829	-0.106164	0.898928	1.2494	1.6958	1.2285	1.05144	1.16075	1.61886	0.903963	1.07353	0.502889	0.671747	1.36768	1.55744	0.811129	1.46923	1.40032	0.608115	0.43778	0.956374	0.909828	0.417983	0.553619	0.443733	0.88252	0.599123	0.617781	0.533151
	9	0.425207	0.250372	0.679615	0.733755	0.62576	0.0336062	0.333255	0.253601	0.502045	0.52982	0.514633	1.10567	1.18682	0.222555	0.468072	0.100977	0.779135	1.32383	1.0528	0.528765	1.07183	0.903664	1.33474	1.44289	1.21378	1.03801	0.451574	1.19159	0.714703	0.944997	0.45791	0.856193	1.39386	1.52182	0.861582	1.43605	1.12441	0.47095	0.439723	0.734166	0.867328	0.457305	0.4364	0.405025	0.788052	0.610152	0.621326	0.668283
	12	0.433521	0.189303	0.527606	0.677729	0.615025	0.0191365	0.294364	0.217167	0.500665	0.556036	0.54007	1.16827	1.4481	0.177379	0.415153	0.0462265	0.776079	1.3118	1.02718	0.395652	0.899981	0.765793	1.35601	1.35379	1.14136	1.07431	0.383632	0.956439	0.64919	0.884564	0.321464	0.776927	1.38134	1.51198	0.834129	1.44738	2.0348	0.307761	0.263945	0.74121	0.707813	0.445955	0.428238	0.417527	0.676865	0.587455	0.634067	0.57346
	15	0.413497	0.153357	0.736398	0.611257	0.571877	0.0089424	0.281504	0.159251	0.331487	0.516659	0.528867	1.16931	1.42365	0.129358	0.376163	0.0309612	0.774855	1.25993	1.02782	0.285176	0.81692	0.881286	0.885362	0.846168	1.13151	1.1137	0.416645	0.847906	0.594006	0.843282	0.224986	0.643212	1.39783	1.44681	0.863282	1.48515	1.8649	0.277302	0.202257	0.756152	0.64895	0.445887	0.372403	0.364557	0.591049	0.555476	0.586602	0.530668
	18	0.364247	0.131905	0.734	0.540753	0.49423	0.0131451	0.2497	0.134767	0.398339	0.540597	0.515003	0.986258	1.27154	0.0990642	0.317273	0.0163791	0.762004	1.19919	1.01328	0.18909	0.694434	0.939056	1.02352	0.812577	1.13049	1.13754	0.379211	0.623547	0.514764	0.715742	0.187025	0.584578	1.39078	1.42065	0.798246	1.53983	1.5787	0.28208	0.129399	0.671036	0.585398	0.423043	0.30156	0.38651	0.50053	0.584137	0.593771	0.37067
	21	0.333752	0.107544	0.649233	0.506019	0.459557	-0.00914856	0.240649	0.111872	0.386546	0.545182	0.489061	1.03323	1.22223	0.0465745	0.261333	0.025483	0.649781	1.18557	1.03536	0.125958	0.634133	0.947007	1.0794	0.672104	1.09867	1.14822	0.36825	0.513362	0.437889	0.6232	0.103033	0.471006	1.14922	0.941315	0.77168	1.52512	1.54155	0.201257	0.113526	0.669833	0.43043	0.367924	0.303205	0.304645	0.418452	0.589648	0.575936	0.361503
	24	0.311899	0.0954345	0.641123	0.487744	0.404226	-0.000666936	0.226977	0.111941	0.364777	0.552118	0.492461	1.05369	1.08943	0.0272052	0.252731	0.0177983	0.591592	1.08936	0.984021	0.0784509	0.555252	0.941265	1.07401	0.659737	0.997806	1.12023	0.320628	0.456223	0.377174	0.553186	0.0876889	0.411859	1.10082	1.02296	0.71139	1.50957	1.52951	0.149702	0.0249819	0.594936	0.336754	0.369995	0.292899	0.296539	0.3609	0.606967	0.556442	0.366632
	27	0.294019	0.0889846	0.640125	0.467517	0.322618	-0.0149516	0.216155	0.0864351	0.340491	0.542108	0.498487	1.05567	0.999318	0.0459402	0.210356	-0.00795433	0.561967	1.05011	0.934356	0.0631935	0.463375	1.01694	1.13216	0.664467	0.682301	1.07715	0.250324	0.387575	0.341842	0.438827	0.0673942	0.349202	1.0967	1.02482	0.6489	1.27419	1.46438	0.111661	0.0610984	0.475597	0.386183	0.356843	0.284673	0.204922	0.33345	0.557245	0.495436	0.321606
	30	0.273718	0.0631746	0.638085	0.438202	0.22297	-0.000124533	0.208945	0.0714587	0.21408	0.467502	0.507718	0.986451	0.785246	0.0794135	0.208977	-0.0270599	0.547175	0.964768	0.872404	0.0250714	0.428654	1.01342	1.16244	0.636104	0.750738	1.05623	0.17969	0.341708	0.282575	0.362281	0.0761943	0.277515	1.00878	0.994311	0.638503	1.19018	1.29651	0.101404	0.0377639	0.448003	0.352773	0.344998	0.28758	0.201626	0.254268	0.576948	0.454575	0.312322
	33	0.265321	0.0323177	0.628821	0.416963	0.183661	-0.0105808	0.184198	0.0477249	0.206757	0.439654	0.505648	0.992816	0.750775	0.0684787	0.176399	-0.0315731	0.498545	0.91932	0.851741	0.016052	0.420288	1.02708	1.15112	0.491983	0.707348	1.05749	0.157532	0.357233	0.236172	0.309266	0.0663054	0.202887	0.862708	0.97595	0.574885	1.15496	1.17739	0.0737403	0.0148153	0.37467	0.318777	0.348545	0.205554	0.19953	0.19839	0.584007	0.43039	0.265178
	36	0.256141	0.00406754	0.592602	0.399061	0.15791	-0.000946495	0.190911	0.0345433	0.218232	0.428574	0.519099	0.984593	0.72048	0.0199582	0.150772	-0.0339356	0.455948	0.869831	0.827195	-0.00574071	0.344482	1.02623	1.17843	0.448262	0.674596	0.831809	0.151231	0.240505	0.199159	0.273775	0.0864101	0.191596	0.784714	0.8712	0.499856	1.09836	1.15779	0.0366983	0.0375078	0.274181	0.311727	0.320372	0.208024	0.193841	0.188337	0.593539	0.434515	0.201908
	39	0.243421	-0.00530724	0.589431	0.349604	0.140464	-0.0142676	0.158164	0.0196562	0.207535	0.436834	0.4679	0.941542	0.665656	0.0403804	0.132449	-0.0329978	0.292348	0.77568	0.799157	0.00138663	0.314284	0.895671	0.997102	0.408999	0.610284	0.82187	0.158924	0.228783	0.176824	0.230771	0.0198431	0.174714	0.735	0.724897	0.493236	1.02582	1.1151	0.0301082	0.0108739	0.248074	0.265071	0.30722	0.167435	0.181583	0.214376	0.569123	0.416184	0.198486
	42	0.226889	-0.0117399	0.577601	0.329576	0.168711	-0.00832815	0.151518	0.00944294	0.206031	0.338437	0.415346	0.763946	0.65434	0.0288235	0.107369	-0.0361973	0.270066	0.65812	0.713522	-0.0177661	0.291567	0.821818	0.96132	0.406869	0.552723	0.809391	0.147523	0.204203	0.172728	0.182793	0.0328129	0.135718	0.688931	0.664112	0.487229	0.957487	1.05648	0.01877	-0.00485137	0.23362	0.224992	0.305233	0.191651	0.169544	0.177669	0.583067	0.418763	0.183656
	45	0.214724	-0.0350761	0.548506	0.29248	0.128659	0.00387458	0.123341	-0.00291883	0.201407	0.365013	0.406261	0.730441	0.577101	0.0397824	0.0812522	-0.0302764	0.245782	0.580014	0.657744	-0.0124494	0.202021	0.811939	0.997746	0.363682	0.523913	0.825158	0.148662	0.172873	0.14537	0.151875	-0.0476592	0.0740039	0.676898	0.64285	0.466268	0.804411	0.883424	0.0210339	-0.00806684	0.227899	0.207773	0.291983	0.162146	0.154586	0.167169	0.577576	0.373742	0.166169
	48	0.197463	-0.0355212	0.516998	0.227194	0.0810727	-0.00719752	0.123576	0.00199015	0.184952	0.35901	0.353678	0.767136	0.558175	0.0315386	0.0647897	-0.0488904	0.241634	0.537569	0.595972	-0.0151967	0.197902	0.837742	0.959993	0.377478	0.472917	0.782823	0.132036	0.139629	0.118237	0.13647	-0.0874682	0.0597089	0.665063	0.592637	0.36243	0.810772	0.78968	0.0236726	-0.00201493	0.227055	0.189692	0.280371	0.178115	0.146106	0.128596	0.519424	0.363845	0.135129
	51	0.184068	-0.0356122	0.493828	0.196134	0.0577279	-0.0342877	0.102283	-0.0127906	0.178449	0.346899	0.348511	0.743831	0.504804	0.0143843	0.0332835	-0.0534029	0.245778	0.514306	0.530818	-0.00865905	0.18044	0.836254	0.918251	0.308442	0.477777	0.662148	0.140065	0.123031	0.132152	0.113364	-0.000901557	0.0983462	0.626902	0.477118	0.389629	0.7167	0.745275	0.0183999	-0.0179644	0.218033	0.166076	0.26108	0.145511	0.120997	0.117142	0.516401	0.336409	0.100503
	54	0.174415	-0.0215379	0.48098	0.224582	0.0753779	-0.00956046	0.0917152	-0.0206364	0.182134	0.331311	0.348305	0.709063	0.477711	0.0216309	0.021782	-0.0329286	0.251572	0.467333	0.476841	-0.0292252	0.178846	0.838748	0.827473	0.279575	0.341122	0.669739	0.12077	0.129359	0.106132	0.0945222	-0.073615	0.0728249	0.533324	0.410068	0.379848	0.680215	0.717612	0.016279	-0.0161026	0.173929	0.151911	0.273341	0.136413	0.122505	0.127399	0.531245	0.293136	0.0706904
	57	0.165434	-0.0284153	0.449021	0.181132	0.0286269	-0.013103	0.0699773	0.00474644	0.176651	0.317536	0.335082	0.664993	0.372018	-0.0260795	0.00484917	-0.0510967	0.257834	0.393463	0.483864	-0.0394643	0.192056	0.807472	0.8587	0.166901	0.32258	0.669087	0.127738	0.0612942	0.0916486	0.0648509	-0.0665294	0.0817805	0.515038	0.419443	0.390706	0.54885	0.659546	0.00218582	-0.0250843	0.167645	0.13146	0.253392	0.108792	0.0991424	0.0941828	0.531771	0.293983	0.0616824
	60	0.153352	-0.0359739	0.367358	0.144119	0.0405646	-0.0138095	0.0782497	-0.020928	0.151871	0.30503	0.280084	0.646201	0.351799	-0.00613245	0.01289	-0.0459257	0.207753	0.353418	0.428639	-0.0334101	0.144597	0.799652	0.856825	0.162591	0.28942	0.638151	0.142515	0.0949897	0.0750776	0.0489	-0.090063	0.0744548	0.449084	0.382891	0.381618	0.487319	0.603189	-0.00740305	-0.0247195	0.141585	0.120498	0.214874	0.0942639	0.108313	0.113422	0.558719	0.270366	0.0401552
	63	0.140952	-0.0338499	0.303158	0.110501	0.0349105	0.00210238	0.0638373	-0.0189238	0.141735	0.297967	0.262085	0.60475	0.332821	0.0151676	0.000685939	-0.0578567	0.211563	0.284113	0.403648	-0.0206893	0.121529	0.804858	0.882087	0.144908	0.262112	0.630499	0.0906885	0.073204	0.0872176	0.0602712	-0.0945451	0.0789742	0.385013	0.347651	0.400055	0.463711	0.567947	-0.0134538	-0.00886008	0.156143	0.0947977	0.210847	0.0903811	0.0741695	0.0956106	0.547589	0.234759	0.0477138
	66	0.132544	-0.0337572	0.291902	0.0747868	0.0765177	-0.00871	-0.00362614	-0.00719382	0.116999	0.257752	0.247922	0.547118	0.291451	0.0124492	0.012465	-0.036678	0.191887	0.272592	0.365878	-0.0231618	0.0922565	0.784956	0.830732	0.115642	0.237723	0.561205	0.128443	0.122144	0.072531	0.0467759	-0.0764915	0.0710961	0.370056	0.291869	0.396012	0.438721	0.604193	-0.00968874	-0.024052	0.123801	0.0530742	0.194809	0.0913146	0.0716145	0.0907502	0.545628	0.218721	0.0468313
	69	0.117326	-0.0429886	0.262014	0.055739	0.0244085	-0.00199806	0.00314001	-0.015954	0.12101	0.235225	0.23268	0.559239	0.295675	0.0444497	0.01565	-0.0318622	0.177915	0.259027	0.319577	-0.0315801	0.119336	0.761564	0.825344	0.136846	0.236521	0.566253	0.104207	0.0630297	0.0506374	0.0201126	-0.0552566	0.0581928	0.329983	0.258302	0.351097	0.320265	0.537162	-0.00584479	-0.0159332	0.114028	0.0590238	0.169986	0.0941049	0.0525766	0.0954103	0.373859	0.215788	0.038463
	72	0.110662	-0.0391898	0.25028	0.0672156	0.0572678	-0.0202903	0.0798176	-0.00668459	0.115981	0.237623	0.228277	0.524541	0.28029	0.0454139	0.0169532	-0.0419429	0.195602	0.193156	0.308634	-0.0220785	0.0736158	0.74607	0.747083	0.0583662	0.234154	0.477081	0.073813	0.0636053	0.0502577	0.0185197	-0.022484	0.0663859	0.274477	0.252304	0.3736	0.275958	0.479682	-0.0144061	0.00233356	0.0929383	0.0418765	0.162433	0.0697795	0.0581453	0.10618	0.453991	0.181074	0.0263454
	75	0.10126	-0.0351506	0.226682	0.0417997	0.0477242	-0.0296857	0.0601077	-0.00778158	0.118067	0.227468	0.211374	0.493993	0.260861	0.043372	0.0227843	-0.0459217	0.194396	0.187366	0.283379	-0.0348421	0.0444813	0.730898	0.736966	0.0236357	0.232196	0.434492	0.101617	0.0429397	0.0522784	-0.00711687	-0.028431	0.0316699	0.27386	0.176594	0.371278	0.243892	0.476537	-0.000844528	0.0112614	0.0372928	0.0201179	0.167493	0.0688746	0.0462486	0.113362	0.449992	0.203243	0.0105078
	78	0.0959084	-0.04571	0.202707	0.0149947	0.0146362	-0.0224974	0.00326214	-0.0137606	0.118498	0.216024	0.192364	0.462084	0.23167	0.0164435	-0.00472135	-0.0436146	0.157164	0.17649	0.242463	-0.0196821	0.0218487	0.670633	0.711727	0.0244918	0.193889	0.449104	0.102057	0.0190946	0.0453916	-0.00520569	-0.0292322	0.0358991	0.211454	0.150801	0.410602	0.257762	0.445312	-0.0114815	-0.0157428	0.0724647	0.0152382	0.131585	0.0698041	0.0376449	0.112223	0.444164	0.155818	0.0213101
	81	0.091977	-0.0466947	0.18671	0.0331413	0.0207722	-0.0166803	0.0743852	-0.0175763	0.0925216	0.190077	0.157729	0.440317	0.229642	0.0328709	0.0109924	-0.0343978	0.178077	0.155562	0.215829	-0.022071	0.00961392	0.657132	0.653689	0.0172838	0.200974	0.430885	0.0762811	0.0411329	0.0569015	-0.0154366	-0.0218623	0.0278352	0.18963	0.127039	0.41278	0.212229	0.408989	-0.0096728	-0.0277326	0.034332	-0.0163159	0.129966	0.0682087	0.0326314	0.087344	0.446334	0.157807	0.0304118
	84	0.0848147	-0.0400562	0.170824	0.00447551	0.0259819	-0.0118428	0.086335	-0.00698083	0.088795	0.168739	0.11916	0.386389	0.233515	0.0362877	0.00855526	-0.052329	0.160229	0.181868	0.19108	-0.0304275	0.0366759	0.638887	0.6424	0.000590535	0.226613	0.422183	0.0739692	0.0287331	0.036664	-0.0179368	-0.058148	0.0422099	0.19834	0.133737	0.377823	0.164473	0.360134	-0.0210665	-0.016047	0.0133144	-0.0204991	0.117819	0.0706385	0.0187856	0.116764	0.444672	0.122947	0.00873888
	87	0.0786379	-0.046073	0.161502	0.00215292	0.030088	-0.00950021	0.0812596	-0.0223602	0.082322	0.13137	0.10593	0.365482	0.177717	0.0235589	0.0137317	-0.0667597	0.1535	0.140831	0.168441	-0.0344378	0.009526	0.635555	0.615252	-0.0648358	0.209174	0.374817	0.0675985	-0.0246841	0.0478539	-0.0243787	-0.0479923	0.0161822	0.189528	0.122703	0.353884	0.156444	0.366958	-0.0170421	-0.0298271	0.0305196	-0.0126959	0.11991	0.0634253	0.0216188	0.0932947	0.455042	0.140442	0.0129874
	90	0.0757767	-0.0480477	0.156618	0.0104972	0.00864128	0.00171668	0.0866038	-0.0225876	0.0792318	0.129732	0.0752292	0.318767	0.190898	0.00439223	0.0104912	-0.0903831	0.153746	0.130448	0.150958	-0.0356497	0.00580604	0.644327	0.621871	-0.0792757	0.224278	0.333643	0.0499813	-0.00189412	0.063132	-0.0215436	-0.0731753	0.066395	0.169236	0.0920604	0.355355	0.145721	0.338747	0.00221219	-0.0179647	0.0268947	-0.0210395	0.0991805	0.056993	-0.00926639	0.13697	0.441472	0.122087	0.0224089
	93	0.0777303	-0.0518205	0.149326	0.0277203	0.0244305	-0.0150332	0.0687942	-0.0231197	0.0828418	0.118259	0.0710872	0.297937	0.175396	-0.0058548	0.0176551	-0.0821701	0.149382	0.0704319	0.104205	-0.0102825	0.0182214	0.635392	0.515914	-0.10254	0.226778	0.310404	0.0271448	0.029984	0.0651346	-0.0296789	-0.0397777	0.0438298	0.151567	0.0707152	0.364687	0.0842519	0.30959	-0.0147732	-0.0126312	0.00608929	-0.0145283	0.107492	0.0474595	-0.0214048	0.0976449	0.414886	0.164425	0.0118639
	96	0.0677878	-0.0476201	0.126129	0.024335	-0.00148149	-0.0179392	0.0752506	-0.0187251	0.094648	0.0889027	0.0689212	0.293709	0.180895	0.021645	0.0187054	-0.065361	0.141735	0.0978251	0.122827	-0.0497905	-0.0147895	0.607274	0.565036	-0.0640157	0.188383	0.29927	0.026137	-0.0244611	0.0619197	-0.0297448	-0.0116211	0.0463539	0.160481	0.0791027	0.363581	0.111825	0.266344	-0.0295256	-0.0246556	-0.00951743	0.00510126	0.0810696	0.0376471	-0.0446242	0.120706	0.432798	0.139687	0.00876716
	99	0.0555003	-0.047307	0.112049	0.0345111	0.0151136	-0.0084671	0.056923	-0.00728462	0.0878195	0.0933672	0.0557031	0.292004	0.170431	0.00259501	0.0128738	-0.0677757	0.12177	0.120049	0.0965198	-0.0434901	-0.00727655	0.580457	0.478262	-0.116502	0.220243	0.260291	0.0532783	-0.00571901	0.0637531	-0.0586879	-0.0147367	0.0439565	0.144509	0.0230743	0.355151	0.0770385	0.210685	-0.0099097	-0.0371681	-0.00384138	0.0114748	0.0944322	0.0186795	-0.0499817	0.0693636	0.382224	0.123438	-0.0148041
	102	0.0543707	-0.0587109	0.0826665	0.044783	-0.0351623	-0.0171832	0.0800636	-0.0191454	0.0852155	0.0913875	0.0491219	0.249777	0.172342	0.0179997	0.0241634	-0.0499648	0.120917	0.0896649	0.0833313	-0.0429263	-0.021129	0.572655	0.449755	-0.058937	0.178294	0.220841	0.0299328	0.0370668	0.0717729	-0.0543171	-0.055223	0.0399752	0.0808582	-0.00258399	0.326606	0.135303	0.220992	-0.00729512	-0.0298969	-0.0100392	0.0207395	0.080267	0.0284171	-0.0561804	0.0967411	0.340321	0.0820836	0.00208097
	105	0.0552074	-0.047814	0.091384	0.0315611	0.0187528	-0.0050294	0.0651327	-0.0113189	0.0764535	0.0693213	0.0348671	0.245695	0.186986	-0.00477454	-0.00170989	-0.0797069	0.10866	0.0775228	0.0793353	-0.0444966	-0.00558155	0.562383	0.44244	-0.066085	0.18486	0.192228	0.056134	0.0239372	0.0719938	-0.0420977	0.00481138	0.0526732	0.0710242	0.0353413	0.337623	0.130499	0.164986	-0.0193563	-0.0334107	0.0029161	0.0201939	0.0837675	0.0347993	-0.0704392	0.111602	0.341048	0.0790665	-0.0122343
	108	0.0548706	-0.0420707	0.0745014	0.0296636	0.024843	-0.0232706	0.0486382	-0.00994265	0.0699742	0.0657727	0.0235415	0.211497	0.129697	0.0184478	0.011205	-0.0571011	0.0974816	0.0428978	0.0681954	-0.0259941	-0.00529328	0.547518	0.429247	-0.06011	0.174883	0.201423	0.0548185	0.0206747	0.0727448	-0.0385398	-0.0280941	0.0388803	0.0595488	-0.00765704	0.300174	0.129073	0.17913	-0.0108267	-0.0170783	0.0245685	0.031952	0.0829468	0.0534815	-0.0520762	0.0907942	0.342911	0.0641368	-0.0192174
	111	0.0463435	-0.0357203	0.0702384	0.0139777	-0.00564947	-0.01746	0.0738873	-0.00618482	0.0701174	0.0324173	0.00780866	0.210448	0.136155	0.0181127	0.00764216	-0.0616314	0.0590969	0.0735461	0.0511005	-0.0293088	-0.00361607	0.412205	0.434443	-0.0737386	0.181686	0.180084	0.0685086	-0.00998186	0.0576323	-0.0462623	-0.0429842	0.064529	0.0525284	-0.00566369	0.315226	0.084048	0.201446	-0.0152835	-0.027095	0.0162646	0.0325084	0.0769892	0.0535286	-0.0672581	0.108734	0.328662	0.0574348	-0.0174951
	114	0.0413707	-0.0342454	0.0539509	0.028865	0.036652	-0.020831	0.0578666	-0.0147613	0.0541203	0.0289715	0.0037516	0.187794	0.129308	0.00682331	0.00409988	-0.0638439	0.0720073	0.0785583	0.0464471	-0.0304802	-0.0227968	0.392606	0.431169	-0.104822	0.175333	0.163331	0.0163298	-0.00846717	0.0636046	-0.0324721	-0.04431	0.0446209	0.0300274	-0.0385647	0.287775	0.114673	0.155202	0.000784064	-0.0426207	-0.00544107	0.0327626	0.0896962	0.0233371	-0.0692336	0.0760022	0.310317	0.0485884	-0.00881884
	117	0.0384098	-0.0350996	0.0555036	0.012377	-0.00165399	-0.0193855	0.0600163	-0.0219106	0.0516198	0.0236952	0.00648591	0.168469	0.14995	0.0208469	-0.000440769	-0.0657343	0.0756126	0.0904951	0.0290587	-0.0239275	-0.00644186	0.366338	0.399471	-0.0919488	0.173916	0.150536	0.0542807	0.0302742	0.0453394	-0.0581903	-0.0379829	0.0266364	0.0503607	-0.0340598	0.266386	0.0858017	0.158265	-0.00677168	-0.0253879	0.0105829	0.0317752	0.0652826	0.033122	-0.0678789	0.072622	0.299062	0.0302356	-0.000991915
	120	0.0409448	-0.0434652	0.0414763	0.0192347	0.0252436	-0.0232885	0.0703139	-0.0197033	0.0473409	0.0172371	-0.00363788	0.137486	0.145698	0.0428139	0.00473585	-0.0753884	0.0374645	0.0526176	0.0471556	-0.0285772	0.0088665	0.3803	0.381682	-0.14524	0.178305	0.155348	0.0440477	0.0206906	0.0548979	-0.0532172	-0.0805013	0.0205221	0.0345243	-0.0329197	0.316578	0.0874953	0.179074	-0.00835572	-0.0375749	0.040363	0.0267473	0.0771906	0.0235281	-0.0784584	0.0788403	0.312271	0.0336801	-0.00564749
	123	0.0370346	-0.0292782	0.0469846	0.0329121	0.0340824	-0.0121582	0.059878	-0.0210103	0.0406427	0.0104819	-0.0121885	0.155876	0.150824	0.0226002	-0.00107048	-0.0529967	0.0393446	0.0754486	0.0448443	-0.0158131	-0.00765427	0.389422	0.402382	-0.129607	0.170711	0.130984	0.038315	0.00595136	0.0587846	-0.0492813	-0.125376	0.0223801	0.0389668	-0.00413386	0.316861	0.0883291	0.147348	-0.0212051	-0.0369209	0.0137077	0.0209368	0.073651	0.017935	-0.0623982	0.0668454	0.294073	0.0331323	-0.0131071
	126	0.0383511	-0.0410256	0.034684	0.00169404	0.0442394	-0.0257626	0.0180817	-0.0251645	0.0518674	-0.000874114	-0.0234168	0.135484	0.139844	0.0260483	-0.000134461	-0.0459442	0.0592192	0.125588	0.0581579	-0.0250774	-0.0433804	0.341913	0.189155	-0.131716	0.137187	0.171742	0.0605872	0.00557988	0.0494607	-0.0532933	-0.0844415	0.0171772	0.0332227	-0.0113551	0.30866	0.0612064	0.148694	-0.00289334	-0.0305651	0.0424674	0.0213271	0.0653689	0.0331278	-0.0543059	0.0510414	0.278501	0.0096463	-0.00504199
	129	0.0327733	-0.0307651	0.0392796	0.0201652	0.0501845	-0.0198853	0.0068953	-0.0250533	0.0518872	-0.00115656	-0.0129414	0.114087	0.177016	0.000575466	-0.00281714	-0.0634363	0.0635463	0.0735438	0.023745	-0.0313535	-0.0129167	0.344274	0.183975	-0.0775111	0.148897	0.202946	0.0620404	0.0267352	0.056454	-0.0599216	-0.125112	0.0160204	0.0693257	0.0113167	0.345426	0.0527616	0.161764	-0.00982323	-0.035648	0.0300404	0.0289947	0.0541865	0.0230108	-0.0636021	0.0730156	0.251946	0.0280767	-0.027985
	132	0.0264782	-0.037786	0.0400677	0.0185195	0.0264939	-0.0132043	0.0275844	-0.00810719	0.0568275	-0.00867564	-0.0362696	0.123767	0.158197	0.0166149	0.0103951	-0.0525998	0.0604772	0.0499128	0.0292584	-0.016695	-0.0250516	0.320033	0.192534	-0.105154	0.109238	0.18457	0.0333026	0.0166411	0.0622807	-0.0498801	-0.0684306	0.0431058	0.0328591	-0.0341632	0.336417	0.034873	0.153274	0.00784478	-0.0212208	0.0212803	0.000208491	0.0489209	-0.00237817	-0.0713189	0.0623769	0.26443	0.0289941	-0.0149618
	135	0.0260002	-0.0415953	0.0188703	0.0281244	0.0114907	-0.0208068	0.0544749	-0.01664	0.0455789	-0.0120835	-0.0329544	0.133384	0.146085	0.0179373	0.0128472	-0.0640756	0.0307624	0.067035	0.0490489	-0.0168733	-0.00906541	0.323051	0.274029	-0.0970504	0.0882545	0.144637	0.041353	-0.0363203	0.0654543	-0.0573823	-0.113732	0.0450969	0.0352243	0.0415761	0.329544	0.0631609	0.13665	0.0087011	-0.0292532	0.00751367	0.00737899	0.0410908	0.00378721	-0.0653081	0.0815974	0.232987	0.0221237	0.00489425
	138	0.0272765	-0.037982	0.0226773	0.00973648	0.0288403	-0.0150896	0.0575894	-0.00907951	0.0548864	-0.0122892	-0.0427321	0.105659	0.129427	0.0220561	0.0126454	-0.0550194	0.037087	0.0348688	0.0358977	-0.00849271	-0.0189573	0.322449	0.0899596	-0.0961191	0.0943397	0.189277	-0.00370608	-0.0258747	0.0439206	-0.0542779	-0.0657184	0.0556272	0.0360086	0.0110369	0.254678	0.0508658	0.138121	0.0061043	-0.0303283	-0.00392938	-0.00313162	0.0466682	0.0262538	-0.0721524	0.0612838	0.22641	0.00363239	0.0213439
	141	0.0167133	-0.0477587	0.00769111	0.01181	0.0361975	-0.0227209	0.0466617	-0.0155398	0.0521963	-0.0188914	-0.0427856	0.0914003	0.16661	0.016704	0.0191898	-0.050301	0.042459	0.0229405	0.00259579	-0.0192483	-0.00427371	0.320324	0.198626	-0.14634	0.114971	0.160717	-0.043645	0.0255327	0.0384414	-0.0476124	-0.114853	0.0428067	0.0478577	0.011023	0.257109	0.0255861	0.129189	0.00397681	-0.0414052	-0.00787168	-0.00134231	0.0546312	0.0160193	-0.0598643	0.0849982	0.214079	0.0343098	0.0181789
	144	0.0237084	-0.049131	0.00561978	0.0102479	-0.0271302	-0.0119969	0.0278043	-0.0142044	0.0623649	-0.0256957	-0.044594	0.110364	0.155052	-0.00852573	0.008029	-0.0621149	0.050479	0.0591762	0.0198227	-0.0111947	-0.00575417	0.300663	0.177661	-0.117153	0.150843	0.15028	-0.0327116	-0.0104366	0.0249154	-0.055623	-0.127843	0.0359632	0.0415997	0.0904347	0.346092	0.0959239	0.16306	-0.00671751	-0.0285733	-0.00179381	-0.00336354	0.0629992	0.0165498	-0.0497224	0.074544	0.207382	0.0355965	0.035109
	147	0.021931	-0.0338282	0.00217858	0.0120449	0.0196705	-0.0209329	0.0286444	-0.00544875	0.0558998	-0.0289461	-0.0480771	0.0928385	0.17859	0.0172584	-0.00592021	-0.0560105	0.0512662	0.0857155	0.0291479	-0.0251829	-0.0227774	0.301322	0.161576	-0.137588	0.117895	0.158338	-0.0434423	-0.0164263	0.0435232	-0.0484141	-0.157749	0.0318327	0.00104321	0.055238	0.373628	0.0557229	0.123763	0.00849336	-0.0248448	0.00151509	-0.00387636	0.0535585	0.0200942	-0.0944349	0.0687135	0.208048	-0.00191396	-0.00390352
	150	0.0191308	-0.0229121	-0.00907682	0.0103027	0.0228921	-0.0181214	0.0499808	-0.00826087	0.0468234	-0.033199	-0.0528236	0.102437	0.140333	-0.00210803	-0.00963759	-0.0719385	0.0538049	0.0546579	-0.00203189	-0.00868928	-0.0137955	0.277996	0.118238	-0.104385	0.113938	0.161307	-0.0492041	-0.0297811	0.0445946	-0.0348727	-0.173827	0.037992	0.0317805	0.0418165	0.295248	0.0168988	0.107663	-0.0125961	-0.0184978	0.027781	0.000348428	0.0647013	0.0199871	-0.0544066	0.0534866	0.229619	0.00994277	-0.00430414
	153	0.0199428	-0.0374352	-0.0183416	0.00641256	0.0210985	-0.0137922	0.036555	-0.0162625	0.0495199	-0.0236972	-0.0546331	0.0909549	0.142651	0.000927046	-0.0157166	-0.0748017	0.0355521	0.0842454	0.00807427	-0.0265764	-0.0234334	0.276041	0.194441	-0.147175	0.123515	0.164307	-0.0432971	0.0264074	0.0165837	-0.0518775	-0.162864	0.0623189	0.0342829	0.0422815	0.284284	0.0220014	0.111331	-0.00579427	-0.0301578	0.00537896	-0.00381252	0.062644	0.00274563	-0.0331688	0.0602081	0.16927	0.03378	-0.0115445
	156	0.0181826	-0.0286967	-0.0226087	0.0220875	0.0087589	-0.0255902	0.0412738	-0.00586427	0.0355762	-0.0297143	-0.0457482	0.0782811	0.127922	-0.0137636	-0.0140831	-0.0803156	0.0401715	0.0839403	0.0056323	-0.048304	-0.0379387	0.261909	0.226228	-0.107843	0.10946	0.14458	-0.0278552	0.0435346	0.0383533	-0.0550969	-0.188677	0.0229175	0.0471641	0.0269673	0.252883	0.0067592	0.114191	0.0164472	-0.0286371	-0.00353758	-0.00287636	0.0761415	-0.0111151	-0.0477656	0.09376	0.164492	-0.00142057	-0.00463079
	159	0.0199256	-0.0315802	-0.0100548	9.41802e-05	0.0172554	-0.010731	0.0572959	-0.023526	0.0338269	-0.0348257	-0.0512377	0.0682238	0.13387	-0.00573511	-0.0045254	-0.0617693	0.0453008	0.0676859	0.00944924	-0.0389066	-0.0411685	0.234968	0.167512	-0.1043	0.0866315	0.125768	-0.0673748	-0.00193484	0.0484929	-0.0446774	-0.159285	0.045714	0.0269707	0.0472151	0.237169	0.00737916	0.0886855	0.0135421	-0.0245514	0.00788188	0.00190116	0.0810467	-0.0193959	-0.0398281	0.0375439	0.17005	-0.0225294	-0.000360401
	162	0.0142858	-0.0347708	-0.00788692	0.00986381	0.0276298	-0.00498337	0.0398295	-0.0110812	0.0289655	-0.0244815	-0.0516393	0.0868488	0.124293	-0.017232	-0.00501992	-0.0718873	0.0456074	0.0623554	0.0266294	-0.0264344	-0.0548019	0.23789	0.0909871	-0.103314	0.0917265	0.0976674	-0.0580383	-0.0121526	0.0273168	-0.0606544	-0.169296	0.0532892	0.0315445	0.0168037	0.212368	0.0110769	0.0922376	-0.000606533	-0.0427784	0.0287228	0.00405302	0.0787947	0.00477136	-0.0410679	0.062502	0.177741	0.00167434	0.00516004
	165	0.0244091	-0.0196277	-0.025325	-7.89474e-05	0.0466821	-0.0205212	0.0426397	-0.0228233	0.0435944	-0.0339643	-0.0539983	0.0619195	0.140121	-0.00626706	-0.0157748	-0.0546386	0.0173026	0.0484219	-0.000913593	-0.0347653	-0.0444577	0.25029	0.151509	-0.112944	0.0978475	0.0809766	0.0185773	-0.0612836	0.0392035	-0.0499461	-0.175479	0.0326535	0.0344864	0.0210377	0.235528	-0.00590018	0.061184	-0.00305402	-0.0272727	0.0247782	-0.0119381	0.062527	0.0074662	-0.0200527	0.0597273	0.172914	-0.00645401	-0.0036458
	168	0.0172032	-0.0217614	-0.00131767	0.00947673	0.0330925	-0.0104435	0.0325074	-0.020027	0.0183014	-0.0262114	-0.0486648	0.0549592	0.134786	-0.0125541	-0.0105793	-0.0433052	0.0273048	0.0633517	0.0049554	-0.0206587	-0.0140592	0.224779	0.154733	-0.101442	0.119429	0.0983534	0.0113409	-0.0318362	0.0457718	-0.0583472	-0.176478	0.0390622	0.032968	0.00369532	0.203898	-0.0269059	0.0873195	0.00292243	-0.049215	0.00585942	-0.00629934	0.0576904	-0.00390983	-0.0339583	0.0540657	0.167034	-0.00163138	0.00696353
	171	0.0213956	-0.0167669	-0.0190951	0.00429197	0.0469782	-0.00987672	0.0277132	-0.015011	0.0278236	-0.0304602	-0.0494824	0.0570886	0.145564	0.00204816	0.00202437	-0.0389759	0.0215466	0.0793884	-0.00982248	-0.0250282	-0.0295277	0.205815	0.171864	-0.107105	0.11881	0.0920794	-0.00507476	-0.0946873	0.0315016	-0.0614353	-0.175213	0.0279122	0.0642214	0.0689943	0.209548	-0.0223081	0.061191	-0.0058555	-0.0289253	0.0441685	-0.0161915	0.0697206	0.00211216	-0.0344592	0.0745333	0.146954	0.0033492	-0.0113068
	174	0.0170968	-0.0311659	-0.0127594	0.0157235	0.00541224	-0.0106117	0.0445336	-0.0193209	0.0258193	-0.0364901	-0.0579399	0.0422623	0.164946	-0.0151445	0.00378677	-0.0520419	0.0115596	0.0697934	0.00547208	-0.0254273	-0.0253184	0.198419	0.165097	-0.0616884	0.0782724	0.0863141	-0.0759612	-0.0982359	0.0329579	-0.0635616	-0.159454	0.0496229	0.0238394	0.00444935	0.214032	0.00789545	0.0815877	-0.00928913	-0.0497196	0.0123497	-0.0184502	0.059649	-0.00233518	-0.0233791	0.0605054	0.152694	-0.00466729	-0.00816844
	177	0.0163911	-0.0379286	-0.0136487	0.015707	0.0399775	-0.0178199	0.0350379	-0.0258545	0.027198	-0.0238475	-0.0478533	0.0400117	0.160252	0.00516717	0.00214928	-0.0523166	0.0292847	0.0106198	-0.0129144	-0.0418001	-0.0206406	0.195719	0.170385	-0.122568	0.079236	0.0898329	-0.0037	-0.0595286	0.0168452	-0.0340976	-0.192263	0.0577313	0.017176	0.0284171	0.20374	-0.0131117	0.0433028	0.00305952	-0.0323314	0.0333085	-0.00960584	0.0625508	0.00455597	-0.0282908	0.0191037	0.167379	0.0081211	0.000854727
	180	0.0139211	-0.0283552	-0.0230753	0.019724	0.0581968	-0.0139957	0.042508	-0.0224359	0.0522048	-0.0220721	-0.0479886	0.0541898	0.141877	0.00347887	-0.000461204	-0.0477524	0.0276405	0.0578694	-0.0166052	-0.0424214	-0.0344043	0.199267	0.155704	-0.13288	0.0633725	0.089352	-0.0663021	-0.0348677	0.0357051	-0.0432836	-0.10531	0.0635324	0.0164973	0.0285085	0.217074	0.00432203	0.0692291	-0.012301	-0.0215605	0.017882	-0.0245936	0.0708822	0.000980614	-0.0147719	0.0607507	0.143935	-0.000983988	0.0171082
[truncated: 52 more columns]

## Sheet: FigureS3C
Figure S3C
	Decay constant (s-1)
	IRSp53WT	4KE-IBAR	I268N-CRIB
	0.0217187	0.00459199	0.0272316
	0.0619818	0.0594502	0.036949
	0.0140836	0.0429544	0.0200793
	0.0259817	0.0308018	0.0814967
	0.040105	0.00140465	0.102439
	0.128803	0.17545	0.0109023
	0.0317625	0.030163	0.0456334
	0.00737423	0.185247	0.0176868
	0.0730179	0.0336339	0.0217504
	0.0266243	0.00526923	0.0625306
	0.0313356	0.0613367	0.0496995
	0.0919077	0.043926	0.0127145
	0.00737916	0.00756072	0.00965706
	0.049688	0.123344	0.0445751
	0.0097595	0.0519035	0.0207037
	0.157663	0.0140362	0.0308036
	0.0240408	0.00280399	0.078665
	0.0241568	0.0255389	1.81254e-05
	0.00486868	0.0509456	0.0119453
	0.119253
	0.0326767
	0.055638
	0.0135513
	0.0280861
	0.0475802
	0.0714877
	0.0108461
	0.051904
	0.0124174
	0.0693652
	2.07886e-05
	0.0509312
	0.0217187
	0.0619818
	0.0140836
	0.0259817
	0.040105
	0.0753748
	0.0771076
	0.0175208
	0.035331
	0.0268985
	0.0418773
	0.0198222
	0.0191257
	0.017191
	0.0217187
	0.0619818
	0.0140836
	0.0259817
	0.040105
	0.0753748
	0.0118288
	0.0771076
	0.030725
	0.035331
	0.0235918
	0.0418773
	0.0597737
	1.14603e-05
	0.0119896
	0.0573901

## Sheet: FigureS3D
Figure S3D
	Lag (s)
	IRSp53WT	4KE-IBAR	I268N-CRIB
		3	24
	21		0
	39	33	39
	12	3	30
	33	0	54
	12	9	-3
	6	0	12
	15	0
	9	0	3
	21	0	0
	3	0	21
	3	0	39
	12	3	36
	21	-18	27
	24	3	15
	0	0	36
	12	9	24
	3	15
	3		51
	0	-33	42
	30	15	48
	24		24
	0	3	27
	3	9	0
	6	6	0
	0	21	0
	36	12	36
	48	0	42
	39	21	15
	39	6	15
	18	3	0
	6	-9	12
	18	-6	0
	3	-24	12
	30		3
	15	9	12
	27	3	0
	9	12	3
	30	3
	6	3
	0	27
	3	39
	0	45
	-3	0
	3	27
	-3	30
	15	3	18
	3	3	0
	-3	6	3
	0	9	6
	0	21	30
	0	18	6
	9	18	24
	0	9
	-3	30	12
	0	18	6
	0		3
	0	-12	0
	0		36
	3		15
	0	-3	12
	21	-6	0
	-3	0	6
	48	-3	3
	9	0	39
	3	-3	0
	0		12
	0		15
	0	-6	9
	3	18	36
	-3	9	9
	3	45	6
	6		21
	0		12
	0		45
	-3		6
	0	15	0
	-6	9	3
	0	6	12
	0	3	0
	-3	3	3
	3	-3	6
	0	21	6
	-3	-6	18
	3	-6	0
	9	3	45
	-3	3	39
	30	0	15
	36	0	51
	3	0	18
	15	0	51
	30	0	18
	42	3	6
	30	0
	3	0	3
	0	3
	9	0
		45
	9	27
	3	6
		12
	3	-3
		0
	27	12
	33	18
	30	9
	-9	15
	36	30
	15	3
	3	18
	-9	15
	39	6
		6
	12	9
		36
		12
	0	12
	21	24
	21	-3
	3	-3
	-3	-3
	0	12
	0	0
	9	18
	0	0
		12
	12	-3
	21	-3
	3	18
	6	0
	0	6
	6	9
		27
	21	18
	3
	3	9
	0	0
	6
	9
	6
	9
	0
	3
	-3
	9
	45
	12
	6
	27
	0
	0
	18
	0
	21
	33
	-3
	3
	9
	-3
	21
	33
	0
	0
	39
	18
	-3
	36
	9
	6
	36
	-6
	15
	0
	-3
	6
	-12
	-21
	6
	6
	9
	36
	6
	21
	0
	0
	-3
	12
	6
	33
	48
	0
	18
	-33
	18
	3
	0
	3
	6
	36
	15
	6
	3
	6
	33
	12
	48
	42
	6
	12
	27
	3
	24
	0
	0
	30
	0
	27
	9
	24
	-9
	-18
	12
	6
	-3
	6
	9
	6
	12
	12
	6
	18
	3
	33
	0
	0
	-9
	15
	3
	-3
	39
	33
	30
	12
	0
	24
	3
	42
	36
	6
	3
	-6
	6
	0
	-6
	-6
	42
	12
	-12
	15
	36
	36
	33
	27
	21
	0
	30
	39
	27
	12
	48
	12
	-9
	0
	12
	18
	3
	0
	3
	0
	0
	0
	3
	9
	3
	0
	12
	3
	15
	27
	3
	9
	18
	0
	18
	0
	0
	6
	18
	3
	15
	6
	3
	9
	0
	9
	0
	27
	21
	0
	30
	30
	0
	6
	21
	12
	36
	0
	21
	24
	0
	15
	3
	3
	0
	0
	0
	3
	6
	0
	0
	3
	27
	-6
	6
	9
	3
	6
	21
	-3
	9
	48
	12
	18
	6
	12
	9
	30
	9
	9
	12
	30
	27
	3
	9
	9
	12
	18
	18
	30
	9
	6
	0
	6
	0
	3
	0
	9
	3
	9
	6
	15
	21
	15
	-15
	27
	36
	30
	-24
	21
	18
	3
	0
	12
	21
	39
	0
	0
	3
	3
	0
	0
	0
	12
	3
	15
	0
	0
	0
	0
	0
	27
	9
	0
	0
	0
	12
	3
	0
	39
	0
	6
	3
	3
	0
	6
	0
	6
	0
	3
	0
	-3
	3
	9
	0
	3
	9
	24
	6
	0
	0
	9
	-6
	9
	3
	24
	12
	21
	15
	0
	9
	0
	6
	0
	36
	45
	21
	27
	0
	-3
	-3
	0
	12
	9
	6
	3
	36
	-3

## Sheet: FigureS3F
Figure S3F
	Fluorescence versus time
	Time (s)	IRSp53-/-R IRSp53
	0	0.540632	0.457145	1.16411	0.751506	0.785454	0.196969	0.392681	0.558711	0.62887	0.459667	0.711222	1.05607	1.63843	0.478442	0.801629	0.766582	0.770099	1.7036	0.855151	0.709041	-0.0525439	0.629503	1.56059	1.84393	1.85254	1.35352	2.14427	1.68153	1.01266	2.0372	0.985039	1.24502	1.19215	2.14446	0.724556	2.11933	2.35569	0.92279	0.684891	1.21289	1.29522	0.295049	0.620188	0.558738	1.31554	0.062846	0.520729	0.559538
	3	0.522168	0.421895	1.07414	0.776716	0.659167	0.186212	0.379874	0.512609	0.660285	0.542371	0.655175	0.888061	1.40311	0.357417	0.677765	0.532424	0.998163	1.86598	1.17168	0.842344	0.216439	0.827909	1.33885	1.40549	1.09713	1.09924	1.44486	1.98004	0.954419	1.56502	0.756713	1.01076	1.24733	1.85834	0.78337	1.78154	1.55351	0.720707	0.582391	1.09291	0.968244	0.350498	0.612885	0.482193	1.0231	0.0416376	0.62242	0.599788
	6	0.478742	0.32082	0.87911	0.765352	0.686645	0.109691	0.33778	0.380594	0.617368	0.541434	0.600091	0.991052	1.53397	0.273029	0.52764	0.235888	0.935244	1.06454	1.14031	0.693829	-0.106164	0.898928	1.2494	1.6958	1.2285	1.05144	1.16075	1.61886	0.903963	1.07353	0.502889	0.671747	1.36768	1.55744	0.811129	1.46923	1.40032	0.608115	0.43778	0.956374	0.909828	0.417983	0.553619	0.443733	0.88252	0.599123	0.617781	0.533151
	9	0.425207	0.250372	0.679615	0.733755	0.62576	0.0336062	0.333255	0.253601	0.502045	0.52982	0.514633	1.10567	1.18682	0.222555	0.468072	0.100977	0.779135	1.32383	1.0528	0.528765	1.07183	0.903664	1.33474	1.44289	1.21378	1.03801	0.451574	1.19159	0.714703	0.944997	0.45791	0.856193	1.39386	1.52182	0.861582	1.43605	1.12441	0.47095	0.439723	0.734166	0.867328	0.457305	0.4364	0.405025	0.788052	0.610152	0.621326	0.668283
	12	0.433521	0.189303	0.527606	0.677729	0.615025	0.0191365	0.294364	0.217167	0.500665	0.556036	0.54007	1.16827	1.4481	0.177379	0.415153	0.0462265	0.776079	1.3118	1.02718	0.395652	0.899981	0.765793	1.35601	1.35379	1.14136	1.07431	0.383632	0.956439	0.64919	0.884564	0.321464	0.776927	1.38134	1.51198	0.834129	1.44738	2.0348	0.307761	0.263945	0.74121	0.707813	0.445955	0.428238	0.417527	0.676865	0.587455	0.634067	0.57346
	15	0.413497	0.153357	0.736398	0.611257	0.571877	0.0089424	0.281504	0.159251	0.331487	0.516659	0.528867	1.16931	1.42365	0.129358	0.376163	0.0309612	0.774855	1.25993	1.02782	0.285176	0.81692	0.881286	0.885362	0.846168	1.13151	1.1137	0.416645	0.847906	0.594006	0.843282	0.224986	0.643212	1.39783	1.44681	0.863282	1.48515	1.8649	0.277302	0.202257	0.756152	0.64895	0.445887	0.372403	0.364557	0.591049	0.555476	0.586602	0.530668
	18	0.364247	0.131905	0.734	0.540753	0.49423	0.0131451	0.2497	0.134767	0.398339	0.540597	0.515003	0.986258	1.27154	0.0990642	0.317273	0.0163791	0.762004	1.19919	1.01328	0.18909	0.694434	0.939056	1.02352	0.812577	1.13049	1.13754	0.379211	0.623547	0.514764	0.715742	0.187025	0.584578	1.39078	1.42065	0.798246	1.53983	1.5787	0.28208	0.129399	0.671036	0.585398	0.423043	0.30156	0.38651	0.50053	0.584137	0.593771	0.37067
	21	0.333752	0.107544	0.649233	0.506019	0.459557	-0.00914856	0.240649	0.111872	0.386546	0.545182	0.489061	1.03323	1.22223	0.0465745	0.261333	0.025483	0.649781	1.18557	1.03536	0.125958	0.634133	0.947007	1.0794	0.672104	1.09867	1.14822	0.36825	0.513362	0.437889	0.6232	0.103033	0.471006	1.14922	0.941315	0.77168	1.52512	1.54155	0.201257	0.113526	0.669833	0.43043	0.367924	0.303205	0.304645	0.418452	0.589648	0.575936	0.361503
	24	0.311899	0.0954345	0.641123	0.487744	0.404226	-0.000666936	0.226977	0.111941	0.364777	0.552118	0.492461	1.05369	1.08943	0.0272052	0.252731	0.0177983	0.591592	1.08936	0.984021	0.0784509	0.555252	0.941265	1.07401	0.659737	0.997806	1.12023	0.320628	0.456223	0.377174	0.553186	0.0876889	0.411859	1.10082	1.02296	0.71139	1.50957	1.52951	0.149702	0.0249819	0.594936	0.336754	0.369995	0.292899	0.296539	0.3609	0.606967	0.556442	0.366632
	27	0.294019	0.0889846	0.640125	0.467517	0.322618	-0.0149516	0.216155	0.0864351	0.340491	0.542108	0.498487	1.05567	0.999318	0.0459402	0.210356	-0.00795433	0.561967	1.05011	0.934356	0.0631935	0.463375	1.01694	1.13216	0.664467	0.682301	1.07715	0.250324	0.387575	0.341842	0.438827	0.0673942	0.349202	1.0967	1.02482	0.6489	1.27419	1.46438	0.111661	0.0610984	0.475597	0.386183	0.356843	0.284673	0.204922	0.33345	0.557245	0.495436	0.321606
	30	0.273718	0.0631746	0.638085	0.438202	0.22297	-0.000124533	0.208945	0.0714587	0.21408	0.467502	0.507718	0.986451	0.785246	0.0794135	0.208977	-0.0270599	0.547175	0.964768	0.872404	0.0250714	0.428654	1.01342	1.16244	0.636104	0.750738	1.05623	0.17969	0.341708	0.282575	0.362281	0.0761943	0.277515	1.00878	0.994311	0.638503	1.19018	1.29651	0.101404	0.0377639	0.448003	0.352773	0.344998	0.28758	0.201626	0.254268	0.576948	0.454575	0.312322
	33	0.265321	0.0323177	0.628821	0.416963	0.183661	-0.0105808	0.184198	0.0477249	0.206757	0.439654	0.505648	0.992816	0.750775	0.0684787	0.176399	-0.0315731	0.498545	0.91932	0.851741	0.016052	0.420288	1.02708	1.15112	0.491983	0.707348	1.05749	0.157532	0.357233	0.236172	0.309266	0.0663054	0.202887	0.862708	0.97595	0.574885	1.15496	1.17739	0.0737403	0.0148153	0.37467	0.318777	0.348545	0.205554	0.19953	0.19839	0.584007	0.43039	0.265178
	36	0.256141	0.00406754	0.592602	0.399061	0.15791	-0.000946495	0.190911	0.0345433	0.218232	0.428574	0.519099	0.984593	0.72048	0.0199582	0.150772	-0.0339356	0.455948	0.869831	0.827195	-0.00574071	0.344482	1.02623	1.17843	0.448262	0.674596	0.831809	0.151231	0.240505	0.199159	0.273775	0.0864101	0.191596	0.784714	0.8712	0.499856	1.09836	1.15779	0.0366983	0.0375078	0.274181	0.311727	0.320372	0.208024	0.193841	0.188337	0.593539	0.434515	0.201908
	39	0.243421	-0.00530724	0.589431	0.349604	0.140464	-0.0142676	0.158164	0.0196562	0.207535	0.436834	0.4679	0.941542	0.665656	0.0403804	0.132449	-0.0329978	0.292348	0.77568	0.799157	0.00138663	0.314284	0.895671	0.997102	0.408999	0.610284	0.82187	0.158924	0.228783	0.176824	0.230771	0.0198431	0.174714	0.735	0.724897	0.493236	1.02582	1.1151	0.0301082	0.0108739	0.248074	0.265071	0.30722	0.167435	0.181583	0.214376	0.569123	0.416184	0.198486
	42	0.226889	-0.0117399	0.577601	0.329576	0.168711	-0.00832815	0.151518	0.00944294	0.206031	0.338437	0.415346	0.763946	0.65434	0.0288235	0.107369	-0.0361973	0.270066	0.65812	0.713522	-0.0177661	0.291567	0.821818	0.96132	0.406869	0.552723	0.809391	0.147523	0.204203	0.172728	0.182793	0.0328129	0.135718	0.688931	0.664112	0.487229	0.957487	1.05648	0.01877	-0.00485137	0.23362	0.224992	0.305233	0.191651	0.169544	0.177669	0.583067	0.418763	0.183656
	45	0.214724	-0.0350761	0.548506	0.29248	0.128659	0.00387458	0.123341	-0.00291883	0.201407	0.365013	0.406261	0.730441	0.577101	0.0397824	0.0812522	-0.0302764	0.245782	0.580014	0.657744	-0.0124494	0.202021	0.811939	0.997746	0.363682	0.523913	0.825158	0.148662	0.172873	0.14537	0.151875	-0.0476592	0.0740039	0.676898	0.64285	0.466268	0.804411	0.883424	0.0210339	-0.00806684	0.227899	0.207773	0.291983	0.162146	0.154586	0.167169	0.577576	0.373742	0.166169
	48	0.197463	-0.0355212	0.516998	0.227194	0.0810727	-0.00719752	0.123576	0.00199015	0.184952	0.35901	0.353678	0.767136	0.558175	0.0315386	0.0647897	-0.0488904	0.241634	0.537569	0.595972	-0.0151967	0.197902	0.837742	0.959993	0.377478	0.472917	0.782823	0.132036	0.139629	0.118237	0.13647	-0.0874682	0.0597089	0.665063	0.592637	0.36243	0.810772	0.78968	0.0236726	-0.00201493	0.227055	0.189692	0.280371	0.178115	0.146106	0.128596	0.519424	0.363845	0.135129
	51	0.184068	-0.0356122	0.493828	0.196134	0.0577279	-0.0342877	0.102283	-0.0127906	0.178449	0.346899	0.348511	0.743831	0.504804	0.0143843	0.0332835	-0.0534029	0.245778	0.514306	0.530818	-0.00865905	0.18044	0.836254	0.918251	0.308442	0.477777	0.662148	0.140065	0.123031	0.132152	0.113364	-0.000901557	0.0983462	0.626902	0.477118	0.389629	0.7167	0.745275	0.0183999	-0.0179644	0.218033	0.166076	0.26108	0.145511	0.120997	0.117142	0.516401	0.336409	0.100503
	54	0.174415	-0.0215379	0.48098	0.224582	0.0753779	-0.00956046	0.0917152	-0.0206364	0.182134	0.331311	0.348305	0.709063	0.477711	0.0216309	0.021782	-0.0329286	0.251572	0.467333	0.476841	-0.0292252	0.178846	0.838748	0.827473	0.279575	0.341122	0.669739	0.12077	0.129359	0.106132	0.0945222	-0.073615	0.0728249	0.533324	0.410068	0.379848	0.680215	0.717612	0.016279	-0.0161026	0.173929	0.151911	0.273341	0.136413	0.122505	0.127399	0.531245	0.293136	0.0706904
	57	0.165434	-0.0284153	0.449021	0.181132	0.0286269	-0.013103	0.0699773	0.00474644	0.176651	0.317536	0.335082	0.664993	0.372018	-0.0260795	0.00484917	-0.0510967	0.257834	0.393463	0.483864	-0.0394643	0.192056	0.807472	0.8587	0.166901	0.32258	0.669087	0.127738	0.0612942	0.0916486	0.0648509	-0.0665294	0.0817805	0.515038	0.419443	0.390706	0.54885	0.659546	0.00218582	-0.0250843	0.167645	0.13146	0.253392	0.108792	0.0991424	0.0941828	0.531771	0.293983	0.0616824
	60	0.153352	-0.0359739	0.367358	0.144119	0.0405646	-0.0138095	0.0782497	-0.020928	0.151871	0.30503	0.280084	0.646201	0.351799	-0.00613245	0.01289	-0.0459257	0.207753	0.353418	0.428639	-0.0334101	0.144597	0.799652	0.856825	0.162591	0.28942	0.638151	0.142515	0.0949897	0.0750776	0.0489	-0.090063	0.0744548	0.449084	0.382891	0.381618	0.487319	0.603189	-0.00740305	-0.0247195	0.141585	0.120498	0.214874	0.0942639	0.108313	0.113422	0.558719	0.270366	0.0401552
	63	0.140952	-0.0338499	0.303158	0.110501	0.0349105	0.00210238	0.0638373	-0.0189238	0.141735	0.297967	0.262085	0.60475	0.332821	0.0151676	0.000685939	-0.0578567	0.211563	0.284113	0.403648	-0.0206893	0.121529	0.804858	0.882087	0.144908	0.262112	0.630499	0.0906885	0.073204	0.0872176	0.0602712	-0.0945451	0.0789742	0.385013	0.347651	0.400055	0.463711	0.567947	-0.0134538	-0.00886008	0.156143	0.0947977	0.210847	0.0903811	0.0741695	0.0956106	0.547589	0.234759	0.0477138
	66	0.132544	-0.0337572	0.291902	0.0747868	0.0765177	-0.00871	-0.00362614	-0.00719382	0.116999	0.257752	0.247922	0.547118	0.291451	0.0124492	0.012465	-0.036678	0.191887	0.272592	0.365878	-0.0231618	0.0922565	0.784956	0.830732	0.115642	0.237723	0.561205	0.128443	0.122144	0.072531	0.0467759	-0.0764915	0.0710961	0.370056	0.291869	0.396012	0.438721	0.604193	-0.00968874	-0.024052	0.123801	0.0530742	0.194809	0.0913146	0.0716145	0.0907502	0.545628	0.218721	0.0468313
	69	0.117326	-0.0429886	0.262014	0.055739	0.0244085	-0.00199806	0.00314001	-0.015954	0.12101	0.235225	0.23268	0.559239	0.295675	0.0444497	0.01565	-0.0318622	0.177915	0.259027	0.319577	-0.0315801	0.119336	0.761564	0.825344	0.136846	0.236521	0.566253	0.104207	0.0630297	0.0506374	0.0201126	-0.0552566	0.0581928	0.329983	0.258302	0.351097	0.320265	0.537162	-0.00584479	-0.0159332	0.114028	0.0590238	0.169986	0.0941049	0.0525766	0.0954103	0.373859	0.215788	0.038463
	72	0.110662	-0.0391898	0.25028	0.0672156	0.0572678	-0.0202903	0.0798176	-0.00668459	0.115981	0.237623	0.228277	0.524541	0.28029	0.0454139	0.0169532	-0.0419429	0.195602	0.193156	0.308634	-0.0220785	0.0736158	0.74607	0.747083	0.0583662	0.234154	0.477081	0.073813	0.0636053	0.0502577	0.0185197	-0.022484	0.0663859	0.274477	0.252304	0.3736	0.275958	0.479682	-0.0144061	0.00233356	0.0929383	0.0418765	0.162433	0.0697795	0.0581453	0.10618	0.453991	0.181074	0.0263454
	75	0.10126	-0.0351506	0.226682	0.0417997	0.0477242	-0.0296857	0.0601077	-0.00778158	0.118067	0.227468	0.211374	0.493993	0.260861	0.043372	0.0227843	-0.0459217	0.194396	0.187366	0.283379	-0.0348421	0.0444813	0.730898	0.736966	0.0236357	0.232196	0.434492	0.101617	0.0429397	0.0522784	-0.00711687	-0.028431	0.0316699	0.27386	0.176594	0.371278	0.243892	0.476537	-0.000844528	0.0112614	0.0372928	0.0201179	0.167493	0.0688746	0.0462486	0.113362	0.449992	0.203243	0.0105078
	78	0.0959084	-0.04571	0.202707	0.0149947	0.0146362	-0.0224974	0.00326214	-0.0137606	0.118498	0.216024	0.192364	0.462084	0.23167	0.0164435	-0.00472135	-0.0436146	0.157164	0.17649	0.242463	-0.0196821	0.0218487	0.670633	0.711727	0.0244918	0.193889	0.449104	0.102057	0.0190946	0.0453916	-0.00520569	-0.0292322	0.0358991	0.211454	0.150801	0.410602	0.257762	0.445312	-0.0114815	-0.0157428	0.0724647	0.0152382	0.131585	0.0698041	0.0376449	0.112223	0.444164	0.155818	0.0213101
	81	0.091977	-0.0466947	0.18671	0.0331413	0.0207722	-0.0166803	0.0743852	-0.0175763	0.0925216	0.190077	0.157729	0.440317	0.229642	0.0328709	0.0109924	-0.0343978	0.178077	0.155562	0.215829	-0.022071	0.00961392	0.657132	0.653689	0.0172838	0.200974	0.430885	0.0762811	0.0411329	0.0569015	-0.0154366	-0.0218623	0.0278352	0.18963	0.127039	0.41278	0.212229	0.408989	-0.0096728	-0.0277326	0.034332	-0.0163159	0.129966	0.0682087	0.0326314	0.087344	0.446334	0.157807	0.0304118
	84	0.0848147	-0.0400562	0.170824	0.00447551	0.0259819	-0.0118428	0.086335	-0.00698083	0.088795	0.168739	0.11916	0.386389	0.233515	0.0362877	0.00855526	-0.052329	0.160229	0.181868	0.19108	-0.0304275	0.0366759	0.638887	0.6424	0.000590535	0.226613	0.422183	0.0739692	0.0287331	0.036664	-0.0179368	-0.058148	0.0422099	0.19834	0.133737	0.377823	0.164473	0.360134	-0.0210665	-0.016047	0.0133144	-0.0204991	0.117819	0.0706385	0.0187856	0.116764	0.444672	0.122947	0.00873888
	87	0.0786379	-0.046073	0.161502	0.00215292	0.030088	-0.00950021	0.0812596	-0.0223602	0.082322	0.13137	0.10593	0.365482	0.177717	0.0235589	0.0137317	-0.0667597	0.1535	0.140831	0.168441	-0.0344378	0.009526	0.635555	0.615252	-0.0648358	0.209174	0.374817	0.0675985	-0.0246841	0.0478539	-0.0243787	-0.0479923	0.0161822	0.189528	0.122703	0.353884	0.156444	0.366958	-0.0170421	-0.0298271	0.0305196	-0.0126959	0.11991	0.0634253	0.0216188	0.0932947	0.455042	0.140442	0.0129874
	90	0.0757767	-0.0480477	0.156618	0.0104972	0.00864128	0.00171668	0.0866038	-0.0225876	0.0792318	0.129732	0.0752292	0.318767	0.190898	0.00439223	0.0104912	-0.0903831	0.153746	0.130448	0.150958	-0.0356497	0.00580604	0.644327	0.621871	-0.0792757	0.224278	0.333643	0.0499813	-0.00189412	0.063132	-0.0215436	-0.0731753	0.066395	0.169236	0.0920604	0.355355	0.145721	0.338747	0.00221219	-0.0179647	0.0268947	-0.0210395	0.0991805	0.056993	-0.00926639	0.13697	0.441472	0.122087	0.0224089
	93	0.0777303	-0.0518205	0.149326	0.0277203	0.0244305	-0.0150332	0.0687942	-0.0231197	0.0828418	0.118259	0.0710872	0.297937	0.175396	-0.0058548	0.0176551	-0.0821701	0.149382	0.0704319	0.104205	-0.0102825	0.0182214	0.635392	0.515914	-0.10254	0.226778	0.310404	0.0271448	0.029984	0.0651346	-0.0296789	-0.0397777	0.0438298	0.151567	0.0707152	0.364687	0.0842519	0.30959	-0.0147732	-0.0126312	0.00608929	-0.0145283	0.107492	0.0474595	-0.0214048	0.0976449	0.414886	0.164425	0.0118639
	96	0.0677878	-0.0476201	0.126129	0.024335	-0.00148149	-0.0179392	0.0752506	-0.0187251	0.094648	0.0889027	0.0689212	0.293709	0.180895	0.021645	0.0187054	-0.065361	0.141735	0.0978251	0.122827	-0.0497905	-0.0147895	0.607274	0.565036	-0.0640157	0.188383	0.29927	0.026137	-0.0244611	0.0619197	-0.0297448	-0.0116211	0.0463539	0.160481	0.0791027	0.363581	0.111825	0.266344	-0.0295256	-0.0246556	-0.00951743	0.00510126	0.0810696	0.0376471	-0.0446242	0.120706	0.432798	0.139687	0.00876716
	99	0.0555003	-0.047307	0.112049	0.0345111	0.0151136	-0.0084671	0.056923	-0.00728462	0.0878195	0.0933672	0.0557031	0.292004	0.170431	0.00259501	0.0128738	-0.0677757	0.12177	0.120049	0.0965198	-0.0434901	-0.00727655	0.580457	0.478262	-0.116502	0.220243	0.260291	0.0532783	-0.00571901	0.0637531	-0.0586879	-0.0147367	0.0439565	0.144509	0.0230743	0.355151	0.0770385	0.210685	-0.0099097	-0.0371681	-0.00384138	0.0114748	0.0944322	0.0186795	-0.0499817	0.0693636	0.382224	0.123438	-0.0148041
	102	0.0543707	-0.0587109	0.0826665	0.044783	-0.0351623	-0.0171832	0.0800636	-0.0191454	0.0852155	0.0913875	0.0491219	0.249777	0.172342	0.0179997	0.0241634	-0.0499648	0.120917	0.0896649	0.0833313	-0.0429263	-0.021129	0.572655	0.449755	-0.058937	0.178294	0.220841	0.0299328	0.0370668	0.0717729	-0.0543171	-0.055223	0.0399752	0.0808582	-0.00258399	0.326606	0.135303	0.220992	-0.00729512	-0.0298969	-0.0100392	0.0207395	0.080267	0.0284171	-0.0561804	0.0967411	0.340321	0.0820836	0.00208097
	105	0.0552074	-0.047814	0.091384	0.0315611	0.0187528	-0.0050294	0.0651327	-0.0113189	0.0764535	0.0693213	0.0348671	0.245695	0.186986	-0.00477454	-0.00170989	-0.0797069	0.10866	0.0775228	0.0793353	-0.0444966	-0.00558155	0.562383	0.44244	-0.066085	0.18486	0.192228	0.056134	0.0239372	0.0719938	-0.0420977	0.00481138	0.0526732	0.0710242	0.0353413	0.337623	0.130499	0.164986	-0.0193563	-0.0334107	0.0029161	0.0201939	0.0837675	0.0347993	-0.0704392	0.111602	0.341048	0.0790665	-0.0122343
	108	0.0548706	-0.0420707	0.0745014	0.0296636	0.024843	-0.0232706	0.0486382	-0.00994265	0.0699742	0.0657727	0.0235415	0.211497	0.129697	0.0184478	0.011205	-0.0571011	0.0974816	0.0428978	0.0681954	-0.0259941	-0.00529328	0.547518	0.429247	-0.06011	0.174883	0.201423	0.0548185	0.0206747	0.0727448	-0.0385398	-0.0280941	0.0388803	0.0595488	-0.00765704	0.300174	0.129073	0.17913	-0.0108267	-0.0170783	0.0245685	0.031952	0.0829468	0.0534815	-0.0520762	0.0907942	0.342911	0.0641368	-0.0192174
	111	0.0463435	-0.0357203	0.0702384	0.0139777	-0.00564947	-0.01746	0.0738873	-0.00618482	0.0701174	0.0324173	0.00780866	0.210448	0.136155	0.0181127	0.00764216	-0.0616314	0.0590969	0.0735461	0.0511005	-0.0293088	-0.00361607	0.412205	0.434443	-0.0737386	0.181686	0.180084	0.0685086	-0.00998186	0.0576323	-0.0462623	-0.0429842	0.064529	0.0525284	-0.00566369	0.315226	0.084048	0.201446	-0.0152835	-0.027095	0.0162646	0.0325084	0.0769892	0.0535286	-0.0672581	0.108734	0.328662	0.0574348	-0.0174951
	114	0.0413707	-0.0342454	0.0539509	0.028865	0.036652	-0.020831	0.0578666	-0.0147613	0.0541203	0.0289715	0.0037516	0.187794	0.129308	0.00682331	0.00409988	-0.0638439	0.0720073	0.0785583	0.0464471	-0.0304802	-0.0227968	0.392606	0.431169	-0.104822	0.175333	0.163331	0.0163298	-0.00846717	0.0636046	-0.0324721	-0.04431	0.0446209	0.0300274	-0.0385647	0.287775	0.114673	0.155202	0.000784064	-0.0426207	-0.00544107	0.0327626	0.0896962	0.0233371	-0.0692336	0.0760022	0.310317	0.0485884	-0.00881884
	117	0.0384098	-0.0350996	0.0555036	0.012377	-0.00165399	-0.0193855	0.0600163	-0.0219106	0.0516198	0.0236952	0.00648591	0.168469	0.14995	0.0208469	-0.000440769	-0.0657343	0.0756126	0.0904951	0.0290587	-0.0239275	-0.00644186	0.366338	0.399471	-0.0919488	0.173916	0.150536	0.0542807	0.0302742	0.0453394	-0.0581903	-0.0379829	0.0266364	0.0503607	-0.0340598	0.266386	0.0858017	0.158265	-0.00677168	-0.0253879	0.0105829	0.0317752	0.0652826	0.033122	-0.0678789	0.072622	0.299062	0.0302356	-0.000991915
	120	0.0409448	-0.0434652	0.0414763	0.0192347	0.0252436	-0.0232885	0.0703139	-0.0197033	0.0473409	0.0172371	-0.00363788	0.137486	0.145698	0.0428139	0.00473585	-0.0753884	0.0374645	0.0526176	0.0471556	-0.0285772	0.0088665	0.3803	0.381682	-0.14524	0.178305	0.155348	0.0440477	0.0206906	0.0548979	-0.0532172	-0.0805013	0.0205221	0.0345243	-0.0329197	0.316578	0.0874953	0.179074	-0.00835572	-0.0375749	0.040363	0.0267473	0.0771906	0.0235281	-0.0784584	0.0788403	0.312271	0.0336801	-0.00564749
	123	0.0370346	-0.0292782	0.0469846	0.0329121	0.0340824	-0.0121582	0.059878	-0.0210103	0.0406427	0.0104819	-0.0121885	0.155876	0.150824	0.0226002	-0.00107048	-0.0529967	0.0393446	0.0754486	0.0448443	-0.0158131	-0.00765427	0.389422	0.402382	-0.129607	0.170711	0.130984	0.038315	0.00595136	0.0587846	-0.0492813	-0.125376	0.0223801	0.0389668	-0.00413386	0.316861	0.0883291	0.147348	-0.0212051	-0.0369209	0.0137077	0.0209368	0.073651	0.017935	-0.0623982	0.0668454	0.294073	0.0331323	-0.0131071
	126	0.0383511	-0.0410256	0.034684	0.00169404	0.0442394	-0.0257626	0.0180817	-0.0251645	0.0518674	-0.000874114	-0.0234168	0.135484	0.139844	0.0260483	-0.000134461	-0.0459442	0.0592192	0.125588	0.0581579	-0.0250774	-0.0433804	0.341913	0.189155	-0.131716	0.137187	0.171742	0.0605872	0.00557988	0.0494607	-0.0532933	-0.0844415	0.0171772	0.0332227	-0.0113551	0.30866	0.0612064	0.148694	-0.00289334	-0.0305651	0.0424674	0.0213271	0.0653689	0.0331278	-0.0543059	0.0510414	0.278501	0.0096463	-0.00504199
	129	0.0327733	-0.0307651	0.0392796	0.0201652	0.0501845	-0.0198853	0.0068953	-0.0250533	0.0518872	-0.00115656	-0.0129414	0.114087	0.177016	0.000575466	-0.00281714	-0.0634363	0.0635463	0.0735438	0.023745	-0.0313535	-0.0129167	0.344274	0.183975	-0.0775111	0.148897	0.202946	0.0620404	0.0267352	0.056454	-0.0599216	-0.125112	0.0160204	0.0693257	0.0113167	0.345426	0.0527616	0.161764	-0.00982323	-0.035648	0.0300404	0.0289947	0.0541865	0.0230108	-0.0636021	0.0730156	0.251946	0.0280767	-0.027985
	132	0.0264782	-0.037786	0.0400677	0.0185195	0.0264939	-0.0132043	0.0275844	-0.00810719	0.0568275	-0.00867564	-0.0362696	0.123767	0.158197	0.0166149	0.0103951	-0.0525998	0.0604772	0.0499128	0.0292584	-0.016695	-0.0250516	0.320033	0.192534	-0.105154	0.109238	0.18457	0.0333026	0.0166411	0.0622807	-0.0498801	-0.0684306	0.0431058	0.0328591	-0.0341632	0.336417	0.034873	0.153274	0.00784478	-0.0212208	0.0212803	0.000208491	0.0489209	-0.00237817	-0.0713189	0.0623769	0.26443	0.0289941	-0.0149618
	135	0.0260002	-0.0415953	0.0188703	0.0281244	0.0114907	-0.0208068	0.0544749	-0.01664	0.0455789	-0.0120835	-0.0329544	0.133384	0.146085	0.0179373	0.0128472	-0.0640756	0.0307624	0.067035	0.0490489	-0.0168733	-0.00906541	0.323051	0.274029	-0.0970504	0.0882545	0.144637	0.041353	-0.0363203	0.0654543	-0.0573823	-0.113732	0.0450969	0.0352243	0.0415761	0.329544	0.0631609	0.13665	0.0087011	-0.0292532	0.00751367	0.00737899	0.0410908	0.00378721	-0.0653081	0.0815974	0.232987	0.0221237	0.00489425
	138	0.0272765	-0.037982	0.0226773	0.00973648	0.0288403	-0.0150896	0.0575894	-0.00907951	0.0548864	-0.0122892	-0.0427321	0.105659	0.129427	0.0220561	0.0126454	-0.0550194	0.037087	0.0348688	0.0358977	-0.00849271	-0.0189573	0.322449	0.0899596	-0.0961191	0.0943397	0.189277	-0.00370608	-0.0258747	0.0439206	-0.0542779	-0.0657184	0.0556272	0.0360086	0.0110369	0.254678	0.0508658	0.138121	0.0061043	-0.0303283	-0.00392938	-0.00313162	0.0466682	0.0262538	-0.0721524	0.0612838	0.22641	0.00363239	0.0213439
	141	0.0167133	-0.0477587	0.00769111	0.01181	0.0361975	-0.0227209	0.0466617	-0.0155398	0.0521963	-0.0188914	-0.0427856	0.0914003	0.16661	0.016704	0.0191898	-0.050301	0.042459	0.0229405	0.00259579	-0.0192483	-0.00427371	0.320324	0.198626	-0.14634	0.114971	0.160717	-0.043645	0.0255327	0.0384414	-0.0476124	-0.114853	0.0428067	0.0478577	0.011023	0.257109	0.0255861	0.129189	0.00397681	-0.0414052	-0.00787168	-0.00134231	0.0546312	0.0160193	-0.0598643	0.0849982	0.214079	0.0343098	0.0181789
	144	0.0237084	-0.049131	0.00561978	0.0102479	-0.0271302	-0.0119969	0.0278043	-0.0142044	0.0623649	-0.0256957	-0.044594	0.110364	0.155052	-0.00852573	0.008029	-0.0621149	0.050479	0.0591762	0.0198227	-0.0111947	-0.00575417	0.300663	0.177661	-0.117153	0.150843	0.15028	-0.0327116	-0.0104366	0.0249154	-0.055623	-0.127843	0.0359632	0.0415997	0.0904347	0.346092	0.0959239	0.16306	-0.00671751	-0.0285733	-0.00179381	-0.00336354	0.0629992	0.0165498	-0.0497224	0.074544	0.207382	0.0355965	0.035109
	147	0.021931	-0.0338282	0.00217858	0.0120449	0.0196705	-0.0209329	0.0286444	-0.00544875	0.0558998	-0.0289461	-0.0480771	0.0928385	0.17859	0.0172584	-0.00592021	-0.0560105	0.0512662	0.0857155	0.0291479	-0.0251829	-0.0227774	0.301322	0.161576	-0.137588	0.117895	0.158338	-0.0434423	-0.0164263	0.0435232	-0.0484141	-0.157749	0.0318327	0.00104321	0.055238	0.373628	0.0557229	0.123763	0.00849336	-0.0248448	0.00151509	-0.00387636	0.0535585	0.0200942	-0.0944349	0.0687135	0.208048	-0.00191396	-0.00390352
	150	0.0191308	-0.0229121	-0.00907682	0.0103027	0.0228921	-0.0181214	0.0499808	-0.00826087	0.0468234	-0.033199	-0.0528236	0.102437	0.140333	-0.00210803	-0.00963759	-0.0719385	0.0538049	0.0546579	-0.00203189	-0.00868928	-0.0137955	0.277996	0.118238	-0.104385	0.113938	0.161307	-0.0492041	-0.0297811	0.0445946	-0.0348727	-0.173827	0.037992	0.0317805	0.0418165	0.295248	0.0168988	0.107663	-0.0125961	-0.0184978	0.027781	0.000348428	0.0647013	0.0199871	-0.0544066	0.0534866	0.229619	0.00994277	-0.00430414
	153	0.0199428	-0.0374352	-0.0183416	0.00641256	0.0210985	-0.0137922	0.036555	-0.0162625	0.0495199	-0.0236972	-0.0546331	0.0909549	0.142651	0.000927046	-0.0157166	-0.0748017	0.0355521	0.0842454	0.00807427	-0.0265764	-0.0234334	0.276041	0.194441	-0.147175	0.123515	0.164307	-0.0432971	0.0264074	0.0165837	-0.0518775	-0.162864	0.0623189	0.0342829	0.0422815	0.284284	0.0220014	0.111331	-0.00579427	-0.0301578	0.00537896	-0.00381252	0.062644	0.00274563	-0.0331688	0.0602081	0.16927	0.03378	-0.0115445
	156	0.0181826	-0.0286967	-0.0226087	0.0220875	0.0087589	-0.0255902	0.0412738	-0.00586427	0.0355762	-0.0297143	-0.0457482	0.0782811	0.127922	-0.0137636	-0.0140831	-0.0803156	0.0401715	0.0839403	0.0056323	-0.048304	-0.0379387	0.261909	0.226228	-0.107843	0.10946	0.14458	-0.0278552	0.0435346	0.0383533	-0.0550969	-0.188677	0.0229175	0.0471641	0.0269673	0.252883	0.0067592	0.114191	0.0164472	-0.0286371	-0.00353758	-0.00287636	0.0761415	-0.0111151	-0.0477656	0.09376	0.164492	-0.00142057	-0.00463079
	159	0.0199256	-0.0315802	-0.0100548	9.41802e-05	0.0172554	-0.010731	0.0572959	-0.023526	0.0338269	-0.0348257	-0.0512377	0.0682238	0.13387	-0.00573511	-0.0045254	-0.0617693	0.0453008	0.0676859	0.00944924	-0.0389066	-0.0411685	0.234968	0.167512	-0.1043	0.0866315	0.125768	-0.0673748	-0.00193484	0.0484929	-0.0446774	-0.159285	0.045714	0.0269707	0.0472151	0.237169	0.00737916	0.0886855	0.0135421	-0.0245514	0.00788188	0.00190116	0.0810467	-0.0193959	-0.0398281	0.0375439	0.17005	-0.0225294	-0.000360401
	162	0.0142858	-0.0347708	-0.00788692	0.00986381	0.0276298	-0.00498337	0.0398295	-0.0110812	0.0289655	-0.0244815	-0.0516393	0.0868488	0.124293	-0.017232	-0.00501992	-0.0718873	0.0456074	0.0623554	0.0266294	-0.0264344	-0.0548019	0.23789	0.0909871	-0.103314	0.0917265	0.0976674	-0.0580383	-0.0121526	0.0273168	-0.0606544	-0.169296	0.0532892	0.0315445	0.0168037	0.212368	0.0110769	0.0922376	-0.000606533	-0.0427784	0.0287228	0.00405302	0.0787947	0.00477136	-0.0410679	0.062502	0.177741	0.00167434	0.00516004
	165	0.0244091	-0.0196277	-0.025325	-7.89474e-05	0.0466821	-0.0205212	0.0426397	-0.0228233	0.0435944	-0.0339643	-0.0539983	0.0619195	0.140121	-0.00626706	-0.0157748	-0.0546386	0.0173026	0.0484219	-0.000913593	-0.0347653	-0.0444577	0.25029	0.151509	-0.112944	0.0978475	0.0809766	0.0185773	-0.0612836	0.0392035	-0.0499461	-0.175479	0.0326535	0.0344864	0.0210377	0.235528	-0.00590018	0.061184	-0.00305402	-0.0272727	0.0247782	-0.0119381	0.062527	0.0074662	-0.0200527	0.0597273	0.172914	-0.00645401	-0.0036458
	168	0.0172032	-0.0217614	-0.00131767	0.00947673	0.0330925	-0.0104435	0.0325074	-0.020027	0.0183014	-0.0262114	-0.0486648	0.0549592	0.134786	-0.0125541	-0.0105793	-0.0433052	0.0273048	0.0633517	0.0049554	-0.0206587	-0.0140592	0.224779	0.154733	-0.101442	0.119429	0.0983534	0.0113409	-0.0318362	0.0457718	-0.0583472	-0.176478	0.0390622	0.032968	0.00369532	0.203898	-0.0269059	0.0873195	0.00292243	-0.049215	0.00585942	-0.00629934	0.0576904	-0.00390983	-0.0339583	0.0540657	0.167034	-0.00163138	0.00696353
	171	0.0213956	-0.0167669	-0.0190951	0.00429197	0.0469782	-0.00987672	0.0277132	-0.015011	0.0278236	-0.0304602	-0.0494824	0.0570886	0.145564	0.00204816	0.00202437	-0.0389759	0.0215466	0.0793884	-0.00982248	-0.0250282	-0.0295277	0.205815	0.171864	-0.107105	0.11881	0.0920794	-0.00507476	-0.0946873	0.0315016	-0.0614353	-0.175213	0.0279122	0.0642214	0.0689943	0.209548	-0.0223081	0.061191	-0.0058555	-0.0289253	0.0441685	-0.0161915	0.0697206	0.00211216	-0.0344592	0.0745333	0.146954	0.0033492	-0.0113068
	174	0.0170968	-0.0311659	-0.0127594	0.0157235	0.00541224	-0.0106117	0.0445336	-0.0193209	0.0258193	-0.0364901	-0.0579399	0.0422623	0.164946	-0.0151445	0.00378677	-0.0520419	0.0115596	0.0697934	0.00547208	-0.0254273	-0.0253184	0.198419	0.165097	-0.0616884	0.0782724	0.0863141	-0.0759612	-0.0982359	0.0329579	-0.0635616	-0.159454	0.0496229	0.0238394	0.00444935	0.214032	0.00789545	0.0815877	-0.00928913	-0.0497196	0.0123497	-0.0184502	0.059649	-0.00233518	-0.0233791	0.0605054	0.152694	-0.00466729	-0.00816844
	177	0.0163911	-0.0379286	-0.0136487	0.015707	0.0399775	-0.0178199	0.0350379	-0.0258545	0.027198	-0.0238475	-0.0478533	0.0400117	0.160252	0.00516717	0.00214928	-0.0523166	0.0292847	0.0106198	-0.0129144	-0.0418001	-0.0206406	0.195719	0.170385	-0.122568	0.079236	0.0898329	-0.0037	-0.0595286	0.0168452	-0.0340976	-0.192263	0.0577313	0.017176	0.0284171	0.20374	-0.0131117	0.0433028	0.00305952	-0.0323314	0.0333085	-0.00960584	0.0625508	0.00455597	-0.0282908	0.0191037	0.167379	0.0081211	0.000854727
	180	0.0139211	-0.0283552	-0.0230753	0.019724	0.0581968	-0.0139957	0.042508	-0.0224359	0.0522048	-0.0220721	-0.0479886	0.0541898	0.141877	0.00347887	-0.000461204	-0.0477524	0.0276405	0.0578694	-0.0166052	-0.0424214	-0.0344043	0.199267	0.155704	-0.13288	0.0633725	0.089352	-0.0663021	-0.0348677	0.0357051	-0.0432836	-0.10531	0.0635324	0.0164973	0.0285085	0.217074	0.00432203	0.0692291	-0.012301	-0.0215605	0.017882	-0.0245936	0.0708822	0.000980614	-0.0147719	0.0607507	0.143935	-0.000983988	0.0171082
[truncated: 86 more columns]

## Sheet: FigureS3G
Figure S3G
	Decay constant (s-1)
	IRSp53WT	ΔIBAR	I403P-SH3	IBAR-domain	W413G-SH3
	0.0217187	0.00683368	0.0410071	0.0032746	0.0133101
	0.0619818	0.0148272	0.0818986	0.0201446	0.00196455
	0.0140836	0.0168241	0.00589665	0.0024185	0.0360674
	0.0259817	0.0649123	0.00259401	0.00588423	0.0127484
	0.040105	0.00818929	0.02589	0.0206629	0.0114643
	0.128803	0.0449091	0.00533499	0.0240241	0.0623837
	0.0317625	0.0175597	0.0297671	0.00474234	0.0340832
	0.00737423	0.0181087	0.0224344	0.0172327	0.0452312
	0.0730179	0.00954411	0.00582856	0.00733773	0.0276045
	0.0266243	0.00219892	0.0431035	0.0077392	0.0348228
	0.0313356	0.000254163	0.0247835	0.0126451	0.0138539
	0.0919077	0.0223708	0.0125859	0.0156486	0.103691
	0.00737916	0.00994344	0.0183582	1.31744e-05	0.0224264
	0.049688	1.57446e-05	0.0481226	0.00819321	0.0239193
	0.0097595	0.011378	2.14523e-05		0.034745
	0.157663	0.0148017	0.016125		0.0229126
	0.0753748		0.0719313		0.000287178
	0.0771076		0.0132765		1.60406e-05
	0.0175208		0.0632311		0.00571289
	0.035331				0.0343661
	0.0268985				0.0272745
	0.0418773				0.00135984
	0.0198222				0.0944142
	0.0191257
	0.017191
	0.035331
	0.0235918
	0.0418773
	0.0597737
	1.14603e-05
	0.0119896
	0.0456188
	0.00737423
	0.0416841
	0.0266243
	0.0802798
	0.0919077
	0.0573901
	0.0305491
	0.0458124
	0.0168116
	0.0229295
	0.0226499
	0.0426973
	0.00786607
	0.0336056
	0.0240408
	0.0241568
	0.00486868
	0.119253
	0.0326767
	0.055638
	0.0135513
	0.0280861
	0.0475802
	0.0714877
	0.0108461
	0.051904
	0.0124174
	0.0693652
	2.07886e-05
	0.0509312

## Sheet: FigureS3H
Figure S3H
	Lag (s)
	IRSp53WT	ΔIBAR	I403P-SH3	IBAR-domain	W413G-SH3
	21	9	6	54
	39	27	12	9	27
	12	24	3	48	30
	33	18	6	42	12
	12	21	0	66
	6	6	3	15	18
	15	18	3		81
	9	51	6	72
	21	39	21	-3	24
	3	12	0	-6	9
	3	12	12	27	6
	12	0	42	36	0
	21	3	39	12	3
	24	9	12		9
	0	0	24	48	0
	12	69	15	-3	6
	3	3	6	3	6
	3	57	9	27	0
	0	15	0	-3	0
	30	0	-6	9	63
	24	30	6	9	18
	0	0		-6
	3	-9	3	9	36
	6	63	63	-3	54
	0	3	9	-9	15
	36	21	-9	87	0
	48	27	30	12	15
	39	48	39	-18	60
	39	18	63	57	0
	18		9	3	63
	6	57	9	36	12
	18	18	60	21	24
	3	15	12	81	27
	30	18	18	12	3
	15	48	18	15	30
	27	6	21	0	48
	9	48	0	24	0
	30	42	0	66	63
	6	48	9	6	27
	0	72	87	-3
	3	45	12	36	45
	0	39	63		42
	-3	36	57	87	15
	3	54	-6	27
	-3	36		45	9
	15	0	9	12	69
	3	9	36	12	6
	-3	0	0	21	15
	0	24	36	42	9
	0	3	21	9	9
	0	3	30	3	42
	9	75	30	48	0
	0	51	0	21	6
	-3	15	18	33	18
	0	9	81	57	15
	0	6	66	9	3
	0	-9	33	33	33
	0	36	-3	0	36
	3	42	12	0	21
	0	54	0	6	6
	21	24	15	6	45
	-3	18	0	0	3
	48	54	-6	6	21
	9	60	75	0	51
	3	39	-18	0	15
	0	108		0	15
	0	36	3	0	30
	0	69	21	33	15
	3	60	-3	54	9
	-3	63	24	0	6
	3	84	0	24	21
	6	9	42	0	12
	0	27		30	15
	0	63	48	33	12
	-3	-6	57	27	12
	0	12	-45		9
	-6	60	9	24	0
	0		24	0	6
	0	21	15	30	0
	-3	-3	0	12	42
	3	3	0	9	33
	0	42	21	24	6
	-3	39	30	15	30
	3	45	15	24	36
	9	9	3	0	0
	-3	-18	6	3	9
	30	75	51	6	30
	36	18	57	-6	42
	3	33		0	-9
	15		63	3	27
	30	18	39	9	12
	42	72	60	-9	27
	30	48	15	51	42
	3	18	69	-15	36
	0	15	54	-18	15
	9	69	66	9	33
		54	12	12	18
	9	12	30	18	48
	3	96		21	27
		-3	33	39	33
	3	3	0	48	42
		-12	3	-3	3
	27	3	0	51	0
	33	24	3	54	9
	30		63	30	42
	-9	30	12	-3	30
	36	-21	9	6	18
	15	36	6	27	-6
	3	42	15	30	15
	-9		-12	36	36
	39	21	81		18
		3	30	78	54
	12	0	3	39	48
		51	15	21	63
		-9	15	12
	0	57	30	21	-18
	21			24	3
	21			51	15
	3			36	51
	-3			0	6
	0			0	27
	0			-6	18
	9			-3	0
	0			21	21
				42	24
	12			-12	-3
	21			24	60
	3			15	30
	6			-21	81
	0			0	45
	6			21	6
				42	60
	21			30	48
	3			-12	69
	3			21	78
	0			75	66
	6			36
	9				75
	6				21
	9				27
	0				12
	3				6
	-3				6
	9				6
	45				21
	12				6
	6				9
	27				9
	0
	0				6
	18				-3
	0				-3
					3
	21
	33				-30
	-3				24
	3				78
	9				0
	-3
	21
	33
	0
	0
	39
	18
	-3
	36
	9
	6
	36
	-6
	15
	0
	-3
	6
	-12
	-21
	6
	6
	9
	36
	6
	21
	0
	0
	-3
	12
	6
	33
	48
	0
	18
	-33
	18
	3
	0
	3
	6
	36
	15
	6
	3
	6
	33
	12
	48
	42
	6
	12
	27
	3
	24
	0
	0
	30
	0
	27
	9
	24
	-9
	-18
	12
	6
	-3
	6
	9
	6
	12
	12
	6
	18
	3
	33
	0
	0
	-9
	15
	3
	-3
	39
	33
	30
	12
	0
	24
	3
	42
	36
	6
	3
	-6
	6
	0
	-6
	-6
	42
	12
	-12
	15
	36
	36
	33
	27
	21
	0
	30
	39
	27
	12
	48
	12
	-9
	0
	12
	18
	3
	0
	3
	0
	0
	0
	3
	9
	3
	0
	12
	3
	15
	27
	3
	9
	18
	0
	18
	0
	0
	6
	18
	3
	15
	6
	3
	9
	0
	9
	0
	27
	21
	0
	30
	30
	0
	6
	21
	12
	36
	0
	21
	24
	0
	15
	3
	3
	0
	0
	0
	3
	6
	0
	0
	3
	27
	-6
	6
	9
	3
	6
	21
	-3
	9
	48
	12
	18
	6
	12
	9
	30
	9
	9
	12
	30
	27
	3
	9
	9
	12
	18
	18
	30
	9
	6
	0
	6
	0
	3
	0
	9
	3
	9
	6
	15
	21
	15
	-15
	27
	36
	30
	-24
	21
	18
	3
	0
	12
	21
	39
	0
	0
	3
	3
	0
	0
	0
	12
	3
	15
	0
	0
	0
	0
	0
	27
	9
	0
	0
	0
	12
	3
	0
	39
	0
	6
	3
	3
	0
	6
	0
	6
	0
	3
	0
	-3
	3
	9
	0
	3
	9
	24
	6
	0
	0
	9
	-6
	9
	3
	24
	12
	21
	15
	0
	9
	0
	6
	0
	36
	45
	21
	27
	0
	-3
	-3
	0
	12
	9
	6
	3
	36
	-3

## Sheet: FigureS3J
Figure S3J
	Fluorescence versus time
	Time (s)	Control																					Rac1-T17N																					Rac1-G12V
	0	0.973805	0.644898	1.3229	1.48913	0.560917	0.818806	0.664616	1.78359	0.802256	0.875097	0.736616	1.52699	1.02103	1.98319	0.972152	1.29979	0.547103	1.01333	0.646104	0.686457	0.631236	0.558841	1.46554	0.60689	2.05837	1.41591	1.09185	1.25066	1.94604	1.36466	1.42304	0.750549	0.988855	1.85285	0.681077	0.677654	0.908211	0.981723	2.04404				0.567812	1.27516	0.744232	0.528265	0.794128	0.831025
	3	0.916389	0.582026	1.16152	1.37304	0.515565	0.650719	0.611246	1.71819	0.48332	0.348333	0.690842	1.20252	0.833543	1.68109	0.950184	0.952212	0.452671	0.839239	0.548723	0.639456	0.512546	0.505103	1.42411	0.584562	1.97294	1.46433	0.966873	0.878248	2.05257	1.36968	1.41703	0.719768	0.960228	1.87042	0.607416	0.524481	0.833327	0.761674	1.52775				0.511532	0.882503	0.653409	0.486789	0.518162	0.536007
	6	0.835207	0.581284	1.02453	1.28254	0.387059	0.503091	0.486538	1.43541	0.31076	0.0992516	0.766635	0.913089	0.674982	1.27094	0.760154	0.725238	0.457823	0.668587	0.478517	0.613205	0.465083	0.484303	1.26323	0.565393	1.88772	1.37828	0.893899	0.553574	1.75277	1.31124	1.27433	0.687993	0.953479	1.63789	0.588884	0.421954	0.790496	0.716446	1.3728				0.450772	0.695051	0.577406	0.468646	0.319145	0.448312
	9	0.717922	0.526326	0.894846	1.04246	0.239233	0.385457	0.403296	1.08047	0.27821	0.610967	0.67706	0.835366	0.485255	1.27131	0.763518	0.644316	0.369863	0.528374	0.425683	0.541818	0.397837	0.417231	1.15059	0.523915	1.8428	1.1681	0.878202	0.642726	1.8084	1.1674	1.25634	0.666199	0.930713	1.66324	0.545904	0.411118	0.772588	0.652163	1.31232				0.39389	0.580784	0.462229	0.408796	0.263547	0.369822
	12	0.744157	0.478035	0.817279	0.938509	0.151766	0.341017	0.334261	1.01145	0.265365	0.494106	0.60115	0.695435	0.552604	1.24466	0.692988	0.560482	0.282378	0.424103	0.359559	0.482001	0.283472	0.414341	1.0533	0.502445	1.75515	1.21582	0.866963	0.65156	1.83777	1.1165	1.26722	0.631239	0.953838	1.69306	0.498613	0.373429	0.752362	0.640258	1.27014				0.352382	0.505362	0.408012	0.369172	0.202119	0.322903
	15	0.70037	0.443333	0.758803	0.806412	0.0805857	0.28493	0.271957	0.940198	0.297866	0.372935	0.48681	0.612509	0.508898	0.970165	0.601288	0.422083	0.208563	0.342184	0.276689	0.48494	0.22818	0.378151	1.08584	0.478124	1.68118	1.1386	0.830592	0.636336	1.71675	1.11392	1.17933	0.591577	0.942021	1.49975	0.458914	0.345947	0.697472	0.622643	1.13324				0.337108	0.442303	0.37877	0.347027	0.160366	0.26344
	18	0.690195	0.431532	0.716033	0.789641	0.04474	0.229892	0.263275	0.977532	0.36231	0.302467	0.427114	0.525112	0.535218	0.821974	0.565048	0.33743	0.165239	0.283231	0.24133	0.451191	0.21905	0.346612	1.1111	0.448372	1.6421	1.1446	0.828725	0.582772	1.65923	1.01396	0.974673	0.546882	0.842796	1.42857	0.44186	0.301557	0.665854	0.612385	1.11256				0.333505	0.388795	0.363444	0.329406	0.117853	0.228713
	21	0.653556	0.422324	0.648615	0.717193	0.0231768	0.193121	0.257152	1.03055	0.349613	0.34329	0.322709	0.428394	0.538569	0.667343	0.513377	0.26169	0.0951933	0.217609	0.214192	0.373982	0.182818	0.347374	1.15426	0.41545	1.61232	1.10836	0.842265	0.547255	1.62932	1.02097	0.906268	0.519812	0.77167	1.42201	0.406126	0.27022	0.600695	0.636314	1.04874				0.269205	0.290795	0.336061	0.292996	0.0944443	0.213208
	24	0.730368	0.350981	0.589134	0.690468	-0.000432882	0.195763	0.195097	1.02887	0.312889	0.320685	0.168134	0.395352	0.477433	0.654684	0.45766	0.213676	0.0251161	0.166459	0.241046	0.316852	0.162657	0.299897	1.1566	0.386454	1.56876	1.10317	0.796328	0.507229	1.56905	0.869241	0.940453	0.49053	0.781227	1.34658	0.383315	0.248103	0.564668	0.620638	0.910286				0.271524	0.22966	0.316113	0.22459	0.0859748	0.212481
	27	0.725955	0.337613	0.505563	0.688933	-0.00254274	0.192778	0.206434	1.05196	0.268608	0.352723	0.235095	0.366927	0.441378	0.626038	0.435149	0.154518	0.0414488	0.136014	0.241705	0.28016	0.147157	0.252777	1.06762	0.380585	1.38062	0.944732	0.760147	0.480986	1.40219	0.889905	0.92449	0.452837	0.768918	1.18946	0.353409	0.222559	0.533144	0.611432	0.844378				0.225992	0.179651	0.290212	0.206736	0.0549822	0.201562
	30	0.693114	0.334128	0.447201	0.677098	-0.0202084	0.183577	0.180348	1.08158	0.252904	0.346432	0.241704	0.27272	0.446928	0.494194	0.427963	0.188012	0.0309887	0.0998851	0.248784	0.257915	0.138691	0.208591	1.05321	0.36826	1.34243	0.953578	0.706149	0.4487	1.24626	0.878791	0.805752	0.388704	0.78775	1.0866	0.317302	0.212311	0.477799	0.584949	0.738401				0.202234	0.144743	0.275294	0.19028	0.0488525	0.183963
	33	0.506638	0.308716	0.399392	0.62621	-0.0304916	0.165135	0.146996	0.991714	0.21433	0.326587	0.000329817	0.263506	0.374782	0.432633	0.380605	0.132608	0.0207883	0.06438	0.199393	0.221765	0.136525	0.152439	1.04824	0.34801	1.24675	0.974991	0.688914	0.430271	1.096	0.848023	0.705891	0.36792	0.782176	1.01553	0.260456	0.221899	0.441818	0.581386	0.557218				0.19513	0.139412	0.265748	0.172975	0.0466506	0.160317
	36	0.538319	0.289578	0.374671	0.577964	-0.0300535	0.138759	0.122139	0.986237	0.196571	0.309563	0.205154	0.251762	0.38851	0.427143	0.294475	0.127618	0.0148286	0.0543988	0.193685	0.220753	0.112761	0.154702	1.05539	0.328358	1.14186	0.900333	0.631079	0.405777	1.05942	0.815587	0.6673	0.318023	0.738123	0.986933	0.245096	0.1957	0.436742	0.563055	0.49609				0.188691	0.146942	0.21328	0.156322	0.0481804	0.145808
	39	0.508453	0.28601	0.299864	0.511476	-0.0288132	0.121244	0.129992	0.996895	0.168629	0.231841	0.213284	0.217396	0.388649	0.337654	0.286103	0.0850978	0.0166444	0.0427058	0.185185	0.209871	0.105216	0.162131	0.980745	0.316134	1.15811	0.87894	0.606258	0.385723	0.995657	0.752547	0.664725	0.287651	0.653167	0.966863	0.21723	0.164355	0.39159	0.544157	0.43359				0.154163	0.105439	0.164352	0.151658	0.0187922	0.134438
	42	0.435253	0.268997	0.308109	0.489883	-0.0469959	0.11473	0.11509	0.738855	0.150114	0.216864	0.195998	0.151473	0.39003	0.314592	0.254298	-0.017334	0.0406377	0.024428	0.173766	0.198043	0.102645	0.155349	0.983096	0.294393	1.13023	0.882568	0.518371	0.368546	0.983168	0.713574	0.643531	0.274979	0.589312	0.929542	0.198043	0.129281	0.371367	0.545077	0.357404				0.159972	0.115721	0.150137	0.135321	0.022443	0.126053
	45	0.385101	0.218516	0.248332	0.435318	-0.0465343	0.100156	0.0942702	0.66935	0.121275	0.191103	0.192968	0.129689	0.352728	0.253113	0.250438	0.00483012	0.0503221	0.0358323	0.134345	0.196002	0.0905305	0.170537	0.952613	0.274231	1.13071	0.887186	0.424774	0.342521	0.963222	0.663024	0.58883	0.276005	0.542246	0.815615	0.1816	0.116956	0.330333	0.49894	0.307433				0.136057	0.0787196	0.134227	0.124204	0.0149471	0.122964
	48	0.430538	0.202194	0.26246	0.388903	-0.0394679	0.101496	0.070703	0.662308	0.0870245	0.157139	0.0877784	0.128694	0.363152	0.232675	0.22173	-0.00918718	0.048855	0.0288489	0.0952122	0.190077	0.0806632	0.187165	0.903624	0.262841	1.12178	0.906584	0.368015	0.315366	0.937104	0.569038	0.579154	0.25626	0.530683	0.716399	0.163912	0.0966429	0.303217	0.46908	0.23707				0.131118	0.0616956	0.124784	0.12125	0.0180791	0.1209
	51	0.487428	0.205575	0.232536	0.341596	-0.0431097	0.0953963	0.0705845	0.65181	0.071725	0.121847	0.0782202	0.160843	0.353078	0.21593	0.187259	0.00353404	0.0122291	0.0162849	0.0788908	0.184967	0.0706282	0.154765	0.876417	0.228044	1.05889	0.907393	0.293831	0.289424	0.94485	0.564253	0.560993	0.247483	0.543939	0.652456	0.152463	0.125588	0.309396	0.428827	0.22688				0.126563	0.0604352	0.13468	0.113728	0.0177891	0.129092
	54	0.358063	0.176953	0.233325	0.312265	-0.0425584	0.0835736	0.0438252	0.618921	0.0516805	0.103877	0.0692874	0.127116	0.34494	0.183624	0.182199	-0.0145069	0.0466759	0.0132892	0.0717237	0.156498	0.0711162	0.155222	0.838396	0.21141	1.03769	0.88384	0.239776	0.277979	0.924002	0.495776	0.530394	0.199823	0.521722	0.569806	0.127986	0.102761	0.304311	0.42887	0.186796				0.124319	0.0448092	0.133683	0.0908454	-0.0159164	0.1231
	57	0.295474	0.148542	0.21023	0.312388	-0.0542002	0.0812795	0.0673135	0.579234	0.031541	0.0869176	0.0976293	0.0483258	0.258403	0.182045	0.174519	-0.0390477	0.0249046	0.0185156	0.0472139	0.147226	0.0682884	0.152658	0.825956	0.212662	1.02454	0.875666	0.212729	0.241194	0.88322	0.48609	0.51098	0.183273	0.489968	0.547727	0.116726	0.1341	0.227773	0.394945	0.157359				0.116235	0.0445411	0.126834	0.0872635	-0.01386	0.117441
	60	0.357842	0.131751	0.177433	0.317288	-0.0373604	0.074314	0.0549914	0.50574	0.00880036	0.0597802	0.0928871	0.0227718	0.257296	0.171996	0.169843	-0.0256725	0.0315611	0.00205724	0.0299742	0.134024	0.062965	0.145443	0.772225	0.19235	0.999392	0.852281	0.195438	0.232239	0.78608	0.47573	0.463305	0.153786	0.481659	0.542239	0.103016	0.111956	0.263154	0.378274	0.136709				0.111498	0.0510112	0.103306	0.0805936	-0.00655348	0.109506
	63	0.332146	0.13797	0.165294	0.271422	-0.0325269	0.0858022	0.0286596	0.479291	0.00453386	0.0566421	0.0533985	0.0591758	0.245901	0.0855465	0.142447	0.0362264	0.0547686	0.0211538	0.00771599	0.118714	0.0694975	0.118596	0.74875	0.195394	0.964956	0.804215	0.194006	0.215612	0.732175	0.452006	0.436317	0.160838	0.477569	0.539782	0.0973894	0.0986064	0.192494	0.365216	0.0702406				0.0729157	0.0508202	0.104226	0.0805704	-0.0168241	0.0866243
	66	0.319205	0.127588	0.180414	0.244301	-0.0270575	0.0759433	0.0353732	0.452377	-0.00614632	0.0533996	0.0465916	0.0506745	0.257823	0.0609073	0.130629	0.0397301	0.0331639	0.0125495	0.0144441	0.108998	0.083444	0.0983387	0.729104	0.173497	0.932583	0.731336	0.156834	0.194503	0.690193	0.395424	0.357819	0.124182	0.454425	0.5334	0.0792265	0.111006	0.15206	0.336588	0.109457				0.0679194	0.0471983	0.103005	0.0612224	-0.0229456	0.0970857
	69	0.30878	0.117388	0.176547	0.271044	-0.0241694	0.070119	0.0397184	0.427973	-0.0519462	0.0270566	0.0658939	0.0282496	0.239132	0.0485138	0.12667	0.0323447	0.00408592	-0.00817965	0.0105581	0.100804	0.0891248	0.103402	0.708125	0.150928	0.749281	0.745855	0.125751	0.184892	0.64875	0.389961	0.326029	0.0949843	0.445889	0.509232	0.0626541	0.097959	0.142231	0.330529	0.0763955				0.0547314	0.0355221	0.102827	0.0654761	-0.0104891	0.0882801
	72	0.245952	0.0983431	0.180983	0.259147	-0.0313437	0.0664064	0.0388372	0.390046	-0.062222	0.0180313	0.0555382	0.058071	0.220382	0.0196539	0.111876	0.0330329	-0.0146421	-0.0340338	0.0009899	0.0850514	0.08829	0.102014	0.700126	0.130175	0.702002	0.750241	0.113353	0.189716	0.556498	0.38931	0.287604	0.0775528	0.43111	0.5143	0.0642701	0.089583	0.123478	0.30983	0.0572534				0.0665123	0.0406813	0.104411	0.0577673	-0.0269941	0.0800159
	75	0.296021	0.113778	0.175803	0.256008	-0.0190111	0.0694999	0.0303266	0.280988	-0.0626592	0.0268163	0.0413198	0.0447021	0.181507	0.0264962	0.0927259	0.0273337	0.023728	0.0224287	-0.013416	0.0612504	0.0777236	0.0961008	0.679681	0.114829	0.68304	0.728379	0.0968284	0.186317	0.522867	0.366537	0.264121	0.087483	0.430215	0.491251	0.0479333	0.0940589	0.129057	0.281481	0.0663726				0.0685977	0.0327847	0.101426	0.0566951	-0.0433632	0.087621
	78	0.195131	0.0972689	0.169759	0.236163	-0.0146542	0.0703235	0.0170312	0.26948	-0.0588305	0.027628	0.0105556	0.0522568	0.209588	0.0155446	0.0937266	0.0303426	-0.000476866	-0.0109104	-0.0148909	0.032277	0.0898636	0.0746168	0.631867	0.109798	0.66328	0.687204	0.109577	0.180849	0.515399	0.363483	0.210325	0.0611934	0.425389	0.456881	0.0235027	0.0789157	0.112696	0.269418	0.041598				0.0593904	0.0349875	0.114623	0.055673	-0.0398573	0.080573
	81	0.185295	0.104401	0.147147	0.214657	-0.0157808	0.062655	0.0264321	0.254835	-0.0719285	0.0485939	0.00220536	0.0490055	0.18558	0.000539574	0.0905769	0.0449168	0.00713264	-0.0207666	-0.039974	0.027173	0.100236	0.0900773	0.594401	0.0935592	0.652383	0.586618	0.0999462	0.159654	0.465207	0.371756	0.169703	0.0510153	0.385926	0.429258	0.0206459	0.0705988	0.0931491	0.248011	0.0143263				0.0775949	0.0330486	0.120159	0.048172	-0.0429178	0.0786103
	84	0.135653	0.0775784	0.170372	0.193828	0.0027223	0.0590763	0.0254036	0.268859	-0.0671639	0.0481731	0.0289751	0.0573983	0.171819	-0.0150162	0.0863447	0.0505356	-0.0260745	-0.0209782	-0.0353993	0.0209569	0.0921598	0.0894222	0.567648	0.08337	0.626473	0.580263	0.107245	0.157198	0.445065	0.355118	0.154134	0.0353587	0.406909	0.397407	0.0224184	0.0558702	0.0793205	0.223841	0.000973859				0.0684823	0.0362315	0.109326	0.0417467	-0.0405301	0.0650365
	87	0.257652	0.0969821	0.157236	0.172287	-0.0355276	0.050108	0.0326556	0.280295	-0.0711147	0.0529551	0.0078343	0.0661106	0.173207	-0.0550217	0.0325634	0.071421	-0.0556198	-0.032431	-0.0540788	0.0165647	0.0873473	0.0666325	0.532628	0.0717999	0.593228	0.564558	0.081068	0.146575	0.411326	0.329527	0.139081	0.0419253	0.368619	0.367237	0.0242788	0.0415294	0.0819697	0.196234	-0.0144805				0.0553601	0.0309174	0.110228	0.0425525	-0.0455409	0.0738247
	90	0.159391	0.0964523	0.171139	0.149101	-0.0278616	0.0425929	0.0238182	0.294885	-0.0445951	0.0428908	-0.0346672	0.0281953	0.135858	-0.0787458	0.0314782	0.0794961	-0.0641367	-0.00691467	-0.0404949	0.0197421	0.0768069	0.0498452	0.543327	0.0619695	0.577981	0.557756	0.100142	0.136897	0.40488	0.31931	0.113872	0.0166172	0.369896	0.365033	0.0232258	0.0194129	0.0609989	0.215692	-0.0194579				0.0522286	0.0331111	0.0888199	0.0338486	-0.0389448	0.0661196
	93	0.160343	0.0878207	0.145232	0.142646	-0.0271224	0.056659	0.0120487	0.271638	-0.0402135	0.041144	-0.0559965	0.0358866	0.122699	-0.0870406	0.0226516	0.0937954	-0.0502595	-0.0225923	-0.0316578	0.00687688	0.0876978	0.0434981	0.563313	0.0594989	0.546954	0.489026	0.125199	0.13358	0.398276	0.299876	0.0984217	0.00808672	0.345798	0.33721	0.00812632	0.0418741	0.0563965	0.196166	-0.0221781				0.0444278	0.0290795	0.0928924	0.0366322	-0.0431389	0.0616968
	96	0.143222	0.0615339	0.13335	0.113658	-0.0065131	0.0492375	0.00675001	0.270547	-0.0401996	0.032529	-0.0151253	0.0244822	0.0815347	-0.0870191	0.0159795	0.0924566	-0.0533868	-0.0612465	-0.0103434	0.0100948	0.0682682	0.0594301	0.544832	0.0713156	0.549721	0.459107	0.124883	0.137421	0.400023	0.300294	0.128113	0.015744	0.324902	0.337463	0.00371781	0.029713	0.0455264	0.175213	-0.0437268				0.0536619	0.035561	0.0988647	0.0433406	-0.0346039	0.0517003
	99	0.140377	0.0872852	0.153739	0.1397	-0.00469286	0.0537946	-0.00549402	0.268065	-0.0274066	0.0351042	-0.0112937	0.0389318	0.0712935	-0.0959906	0.0350719	0.0921672	-0.0722259	-0.0691746	-0.0226521	0.00858066	0.0502221	0.0620804	0.535992	0.0660034	0.516998	0.453867	0.105666	0.123629	0.406402	0.310995	0.0872958	0.00446666	0.322703	0.311511	-0.00368869	0.00999211	0.0406537	0.167893	-0.0348574				0.039871	0.0191299	0.108927	0.0278766	-0.0443053	0.0554373
	102	0.120134	0.0715019	0.169981	0.0829802	-0.00435876	0.0507002	-0.0076127	0.226545	-0.00912592	0.035537	-0.0358479	0.0229545	0.0615518	-0.116276	0.0543545	0.0983692	-0.0807274	-0.0592382	-0.0184749	0.00138279	0.0493449	0.0566273	0.526738	0.0671236	0.506358	0.457219	0.082953	0.114283	0.371189	0.30675	0.0841495	-0.00303738	0.304671	0.287735	0.00205041	0.00644564	0.0189107	0.160572	-0.0242789				0.0435216	0.0245345	0.103087	0.0290657	-0.0310375	0.0494303
	105	0.123991	0.0623714	0.149432	0.0732288	0.00123104	0.0509114	-0.0117739	0.191811	-0.00846865	0.0462174	-0.0231461	0.0213315	0.0538595	-0.133807	0.0370108	0.0702621	-0.066331	-0.0586413	-0.0287993	-0.012128	0.0680345	0.0555287	0.503337	0.0681498	0.483905	0.474521	0.0806029	0.112997	0.354813	0.312056	0.0381332	-0.00696475	0.279429	0.2819	0.00300464	0.00361013	-0.00414456	0.14912	-0.0223665				0.0367943	0.0197863	0.104124	0.0375294	-0.047118	0.0490037
	108	0.0570141	0.0876196	0.152883	0.0792837	0.0126317	0.0463068	-0.0345073	0.196536	-0.0088327	0.0650979	-0.000583843	0.0102265	0.0281902	-0.124738	0.0252751	0.0162229	-0.0537609	-0.0722202	-0.0268839	0.00271114	0.0535941	0.0494586	0.476431	0.0663283	0.468607	0.461337	0.0517178	0.0955123	0.353778	0.29325	0.0598024	-0.00686522	0.286588	0.270178	-0.00387655	-0.014491	-0.00414754	0.145634	-0.022646				0.0168977	0.0215	0.110972	0.0174078	-0.0315976	0.0539994
	111	0.045127	0.0762441	0.173738	0.0918025	0.00215663	0.0424982	-0.0141688	0.154878	-0.0143662	0.0376375	-0.000869242	0.0301802	0.0380119	-0.134439	0.0393379	0.0468879	-0.0834362	-0.0386088	-0.0158107	-0.00713422	0.0477643	0.0463385	0.472288	0.063314	0.464047	0.436547	0.0487189	0.10807	0.325143	0.265944	0.0749291	-0.0112036	0.262495	0.223313	-0.0112712	0.0019282	-0.000140028	0.127229	-0.0469096				0.031675	0.0125429	0.11202	0.0106474	-0.0367982	0.0526948
	114	0.0207197	0.0858533	0.162662	0.0830099	-0.00950737	0.0765838	-0.0112169	0.117298	0.00711814	0.0390858	-0.0525916	0.0191672	0.0434683	-0.105305	0.0248106	0.0529747	-0.047794	-0.0670281	-0.0129335	-0.00383903	0.0516173	0.0554413	0.452631	0.06619	0.414853	0.439203	0.0500253	0.119112	0.338025	0.247112	0.0611625	0.00112624	0.241242	0.190539	0.00556581	0.0102105	-0.0192019	0.11954	-0.00788816				0.0261641	0.0178451	0.093344	0.0217035	-0.0383772	0.052104
	117	0.053011	0.0871535	0.174124	0.0813354	0.0150249	0.0874422	0.0243154	0.148211	0.00443458	0.0388982	-0.0436515	0.0316866	0.0422615	-0.0916622	0.0350934	0.0304373	0.00497522	-0.0653096	-0.0170168	-0.000676533	0.0651069	0.0364982	0.431899	0.0621103	0.407428	0.384023	0.041821	0.119733	0.308729	0.224708	0.0387286	0.00627014	0.235103	0.183791	-0.0104033	0.0116472	-0.00599288	0.108346	-0.00300719				0.035045	0.0112986	0.118531	0.0305264	-0.0410101	0.0541841
	120	0.0164771	0.087887	0.147963	0.0720968	-0.00164766	0.0859356	0.0245074	0.124406	0.00600977	0.0479721	-0.0301089	0.0132963	0.043463	-0.106942	0.0395459	0.0443581	-0.0178019	-0.0150879	-0.0328632	-0.000824388	0.0601385	0.0375127	0.427108	0.0600132	0.397953	0.372641	0.0551372	0.132077	0.312813	0.210129	0.00882868	-0.0086718	0.229602	0.169618	-0.0136596	-0.0111325	0.0120258	0.104638	0.0143632				0.0297805	0.0204848	0.111333	0.0139125	-0.0419993	0.0452133
	123	0.0842194	0.111852	0.155304	0.0872304	-0.00817654	0.0950892	0.0188562	0.133178	-0.0265597	0.0145323	-0.0188062	-0.0046746	0.0377707	-0.117273	0.0413325	0.061431	-0.0358852	-0.00432012	-0.0190742	-0.00535324	0.0480572	0.0440868	0.39009	0.0609477	0.396317	0.342184	0.032271	0.119982	0.292922	0.200552	-0.0125348	-0.00634773	0.211893	0.156196	-0.019677	-0.0193993	-0.00264239	0.0955729	-0.014344				0.0426006	0.0187483	0.107007	0.021927	-0.0456157	0.0367029
	126	-0.00729003	0.112903	0.163664	0.0799284	-0.0111493	0.100942	0.0170041	0.137426	-0.0271667	0.0275243	-0.0436223	0.031718	0.0389564	-0.132356	0.0441237	0.040444	-0.037852	0.0498036	-0.0206023	-0.0128914	0.0459032	0.0235032	0.369316	0.059603	0.384555	0.3054	0.0376583	0.115475	0.265269	0.208992	-0.00648801	-0.00525596	0.195336	0.145926	-0.00689964	-0.00660095	-0.00427253	0.093349	-0.0127117				0.0447972	0.021325	0.0908393	0.0417031	-0.0446405	0.044373
	129	0.0537223	0.115582	0.116511	0.0771666	-0.0226291	0.091499	0.00576426	0.12591	-0.00787288	0.0364723	-0.0229216	0.0626242	0.0319289	-0.134101	0.0451372	0.0607217	-0.0468907	-0.0106705	-0.0197726	-0.0175085	0.0508227	0.030953	0.360337	0.0505336	0.377047	0.288874	0.0230195	0.10419	0.239325	0.195548	0.00161996	-0.00504536	0.175279	0.153475	-0.00990248	-0.0180842	-0.0069353	0.080137	-0.00635904				0.0317608	0.00653829	0.0859772	0.0145438	-0.038298	0.0422918
	132	0.0181097	0.10655	0.136235	0.114526	-0.00577681	0.0871863	0.0102841	0.0788678	-0.0156075	0.0535744	-0.026056	-0.00898465	0.0344707	-0.139557	0.0473006	0.0306285	-0.0314018	0.0211444	-0.0142268	-0.0222052	0.0688032	0.0417748	0.346633	0.0439516	0.36605	0.282921	0.0287726	0.10365	0.230825	0.211886	-0.0123882	-0.0142231	0.208949	0.147236	-0.0134821	-0.0195406	-0.010814	0.0812502	-0.0248749				0.02118	0.0164787	0.0801657	0.0380916	-0.0335119	0.0514217
	135	-0.0482741	0.119058	0.141585	0.0899043	-0.0263096	0.0840533	0.0219265	0.0626025	-0.011456	0.0313996	-0.0394852	-0.0139881	0.0668464	-0.116379	0.0390201	0.0380052	-0.0382453	0.0119585	-0.0256789	-0.0182405	0.0697198	0.0397917	0.325771	0.0457099	0.357419	0.253802	0.0298524	0.107252	0.181844	0.189703	-0.0259779	-0.0327033	0.16292	0.130398	-0.00696015	-0.0250962	-0.0172723	0.0654612	-0.0190872				0.0348457	0.0151645	0.0742612	0.0267913	-0.0286978	0.0473843
	138	-0.0335629	0.089274	0.124501	0.105438	-0.0293563	0.0824828	0.0170613	0.0329496	-0.00641023	0.0404718	-0.030257	-0.03133	0.0612998	-0.157167	0.0483066	0.0209567	-0.0230813	0.0323779	-0.00280354	-0.0189417	0.0667455	0.0239642	0.315953	0.0387824	0.353988	0.243488	0.032214	0.0923662	0.170917	0.166625	-0.0227633	0.00103798	0.0375674	0.132712	-0.0218529	-0.0376347	-0.0211683	0.0642543	-0.0205818				0.0424458	0.00498395	0.0842855	0.039557	-0.0376778	0.041433
	141	-0.112744	0.0793118	0.132405	0.0906254	-0.0165026	0.0838841	0.0138175	0.0441574	0.0128362	0.0367811	-0.0472716	-0.00382288	0.0800381	-0.165941	0.05273	0.0455751	-0.0129241	0.0333631	-0.000907138	-0.024316	0.0736204	0.0299546	0.312922	0.0541327	0.332455	0.210681	0.00170724	0.101881	0.147828	0.151661	-0.0262414	-0.00625529	0.174897	0.126912	-1.89106e-05	-0.0262695	-0.036013	0.0524232	-0.0163084				0.0529839	0.0194004	0.103548	0.0158591	-0.0439197	0.0410698
	144	0.0196204	0.0372938	0.123633	0.104317	-0.0141262	0.104051	-0.0103762	0.00919282	0.00455527	0.0438462	-0.0633862	-0.000251479	0.0678582	-0.173907	0.046711	0.0428845	0.00674755	0.0522102	-0.00305539	-0.0167113	0.0754279	0.0158416	0.290188	0.0574084	0.33546	0.176296	-0.0282162	0.0977723	0.130246	0.14014	-0.0473573	-0.0053556	0.121074	0.126282	-0.00277024	-0.0303047	-0.0341775	0.0575786	-0.0132122				0.0249318	0.0112367	0.0696473	0.00889601	-0.0413198	0.044488
	147	-0.0437582	0.0349414	0.117389	0.101416	-0.00346641	0.150737	-0.0279276	0.0114809	0.0250286	0.057097	-0.0954956	0.000722306	0.0499815	-0.157235	0.031362	0.0741092	-0.0204189	0.0305167	-0.00476791	-0.0247764	0.0939927	0.020191	0.276509	0.0465733	0.283655	0.162172	-0.0195327	0.0966531	0.117028	0.148742	-0.0386947	-0.0301427	0.0679673	0.133059	-0.0138672	-0.0210031	-0.0571682	0.0470031	-0.0216597				0.0511021	0.0187672	0.0832376	0.0124998	-0.030751	0.0518609
	150	0.0252545	0.0569477	0.124444	0.10947	-0.0192655	0.168553	-0.0305214	0.0135678	0.0346795	0.0349722	-0.074496	-0.00822637	0.029946	-0.175011	0.0322763	0.0651397	-0.0161396	0.0343129	0.0111797	-0.0345696	0.0946327	0.00925332	0.280637	0.0478547	0.287311	0.145888	-0.0194945	0.0878624	0.093266	0.151999	-0.0270537	-0.0168251	0.0621194	0.12297	-0.000668457	-0.0373624	-0.0783374	0.0453763	-0.00640463				0.0382698	0.0152614	0.0631444	0.0237771	-0.0199409	0.047733
[truncated: 13 more columns]

## Sheet: FigureS3K
Figure S3K
	Decay constant (s-1)
	Control	Rac1-G12V	Rac1-T17N
	0.01115	0.0351	0.02964
	0.02901	0.07268	0.006848
	0.04458	0.04889	0.01967
	0.03034	0.03498	0.01426
	0.1074	0.09525	0.004407
	0.08152	0.07054	0.01909
	0.04732	0.03588	0.03135
	0.01589	0.08923	0.01597
	0.03605	0.09934	0.0194
	0.02899	0.1422	0.01671
	0.03633	0.0562	0.02153
	0.05671	0.1368	0.008443
	0.01893	0.1374	0.01917
	0.03609	0.1264	0.0264
	0.03248	0.1095	0.0292
	0.08248	0.107	0.01836
	0.06264	0.1208	0.008912
	0.07193	0.1435	0.03438
	0.03547	0.05727
	0.02652
	0.0734
