# Supplementary material for: A mechanosensing mechanism controls plasma membrane shape homeostasis at the nanoscale
Source: eLife. 2023 Sep 25;12:e72316. doi: 10.7554/eLife.72316 (PMC10569792; doi:10.7554/eLife.72316)
Supplement: Figure 3—source data 1. [file elife-72316-fig3-data1.xlsx]

## Sheet: Figure3F
Figure 3F
	Fluorescence versus time
	Time (s)	IRSP53WT-GFP
	0	0.0290796	0.0387515	0.159695	0.484616	0.0938825	0.0255964	0.0458134	0.0373802	0.574647	0.158337	-0.0223112	0.266191	0.305501	0.145818	0.59613	0.0953999	0.0933625	0.45462	0.399244	0.263055	0.119736	-0.0178022	-0.00647873	0.47932	0.268339	-0.0724109	0.291732	-0.0899361	0.187587	0.303863	0.0738852	0.511181	0.384586	-0.0668979	0.878452	0.382818	0.213298	-0.0218047	0.32425	0.184717	0.649123	0.360383	0.333835	0.519707	0.116866	0.0675444	0.144755	0.0498486
	3	0.0304497	0.0603816	0.133808	0.486281	0.0346938	0.00199477	0.0591025	0.00192042	0.523012	0.148055	-0.00294419	0.31532	0.327187	0.173331	0.63022	0.074967	0.153645	0.474514	0.343216	0.265495	0.164223	0.146004	0.0167566	0.580616	0.209881	0.0369361	0.0642127	0.0232721	0.167355	0.303058	0.0746004	0.38529	0.169112	0.0445359	0.591257	0.545308	0.219112	-0.0454102	0.30016	0.317001	0.608487	0.263052	0.310171	0.414787	0.140085	0.191127	0.147809	0.366962
	6	0.0338545	0.0346943	0.10314	0.507114	0.0474764	-0.00660091	0.0208493	-0.00898874	0.448785	0.147168	0.04179	0.344358	0.311536	0.143138	0.632411	0.202954	0.0925968	0.416167	0.11704	0.267114	0.157625	-0.0477545	0.100633	0.54674	0.175439	0.0491729	0.0381723	0.0146691	0.143967	0.289164	0.0887283	0.41265	0.321521	0.0206692	0.398319	0.559394	0.293118	-0.0640169	0.274402	0.289739	0.718691	0.261574	0.225083	0.428875	0.0729045	0.23044	0.180174	0.0254353
	9	-0.00528828	0.0318995	0.0478643	0.392455	0.057369	-0.0320879	0.0188723	-0.0350812	0.469652	0.0888543	0.0194948	0.345188	0.296856	0.112548	0.647556	0.247548	0.102706	0.48327	0.353452	0.288006	0.185506	0.25761	0.0164606	0.69907	0.211404	0.014513	0.151587	0.0505104	0.141965	0.320271	0.0917756	0.445437	0.33226	-0.034293	0.187464	0.65252	0.213436	-0.020401	0.204111	0.360789	0.580028	0.211203	0.253342	0.285918	0.133	0.276568	0.24699	0.24819
	12	0.0109881	0.0389707	0.0430387	0.412665	0.0522933	-0.0695893	-0.0127506	-0.0396022	0.439731	0.171968	0.00903616	0.336841	0.255408	0.133043	0.647835	0.242372	0.0766291	0.531333	0.127652	0.286794	0.141559	0.180642	0.0737804	0.594081	0.208879	-0.0275831	0.272824	0.145651	0.10921	0.21942	0.0603866	0.377069	0.407029	-0.0556541	0.318186	0.679125	0.23819	-0.0131827	0.22018	0.312275	0.65554	0.270121	0.221751	0.386732	0.134964	0.255977	0.295861	0.372721
	15	0.00774794	-0.0459991	0.103789	0.407545	0.0735303	-0.0638703	0.0130172	-0.0462095	0.401642	0.160094	0.0254024	0.355777	0.256099	0.13339	0.587937	0.215535	0.084899	0.429003	0.131639	0.296867	0.151842	0.203332	0.081784	0.649523	0.0580428	0.105763	0.300765	0.107967	0.110481	0.368762	0.0715077	0.293609	0.414628	0.117156	0.219214	0.695714	0.189986	-0.0495526	0.22123	0.363237	0.627853	0.221212	0.167567	0.337283	0.112653	0.363415	0.19106	0.375973
	18	0.0208988	0.0284905	0.0565526	0.479117	0.0229895	-0.072089	0.0570595	-0.062367	0.341428	0.136689	0.0341271	0.386728	0.267551	0.0483452	0.503003	0.214194	0.139674	0.358542	0.322861	0.284861	0.142541	0.114893	0.0772388	0.623245	0.149731	-0.0671027	0.231648	0.151136	0.0929475	0.341302	0.0364736	0.404895	0.388527	0.129309	0.11041	0.544315	0.214856	-0.0323588	0.145198	0.360596	0.697492	0.247675	0.141709	0.295128	0.0955742	0.318851	0.188869	0.297937
	21	0.019555	0.0109696	0.08265	0.456759	0.0246569	-0.0443559	0.0573469	-0.0433989	0.254211	0.150512	0.0647347	0.385979	0.24316	0.113111	0.5674	0.247676	0.131575	0.460256	0.35613	0.280142	0.0821205	0.237235	0.0801079	0.570636	0.123091	-0.0293782	0.33016	0.136218	0.101071	0.224923	0.0158949	0.491745	0.413604	-0.0951005	0.208141	0.663457	0.190034	-0.0688192	0.0270256	0.368082	0.660228	0.141133	0.184464	0.364201	0.10451	0.197808	0.204343	0.250829
	24	0.0512054	-0.00288911	0.042666	0.432548	-0.0313328	-0.0460822	0.0597966	-0.0784509	0.184398	0.155095	0.0319552	0.380459	0.268391	0.0723618	0.535196	0.259235	0.136492	0.461439	0.220066	0.238832	0.102699	0.125426	0.0676527	0.555068	0.192082	-0.152329	0.286063	0.0810297	0.0931265	0.246454	-0.00563734	0.452251	0.349052	-0.0325671	0.192711	0.578448	0.162411	-0.098024	0.12059	0.317453	0.503516	0.140242	0.0963211	0.343757	0.123543	0.440013	0.319635	0.334766
	27	0.0168738	0.0157074	0.0934091	0.453999	-0.0637218	-0.0624158	0.0211686	-0.0695595	0.190787	0.149463	0.0625972	0.362036	0.240083	0.00181941	0.58891	0.22095	0.111894	0.421938	0.218481	0.27496	0.0672748	0.184342	0.107375	0.356779	0.221423	-0.0750513	0.328687	0.067242	0.0694964	0.175639	-0.00367908	0.423034	0.373745	0.0202774	0.140141	0.629957	0.217363	-0.141357	0.113643	0.416412	0.540739	0.164337	0.126701	0.391599	0.111233	0.366207	0.194431	0.267403
	30	-0.0581157	-0.0358583	0.0966795	0.450003	-0.101555	-0.0482973	0.0332265	-0.0804122	0.17038	0.144751	0.0541468	0.383823	0.226904	0.0695261	0.457939	0.238655	0.0946462	0.474116	0.291193	0.254422	0.0315584	0.069376	0.103904	0.435348	0.268737	-0.0848749	0.219265	0.0757383	0.0604	0.202989	-0.00912205	0.578099	0.278501	-0.0360271	0.14751	0.513718	0.132284	-0.0683788	0.0522466	0.452226	0.512477	0.127756	0.127557	0.322735	0.0932686	0.402786	0.203932	0.259017
	33	0.0114317	-0.0608677	0.0843325	0.445775	-0.143869	-0.0568461	0.0072472	-0.075087	0.0186797	0.118413	0.043803	0.358675	0.231215	0.0257014	0.478433	0.348005	0.106109	0.427681	0.157557	0.215723	0.0581916	0.149698	0.145566	0.3853	0.155404	-0.0518048	0.244866	-0.0191256	0.027937	0.146523	-0.038863	0.668474	0.288275	-0.0678998	0.0639136	0.572991	0.153372	-0.142509	-0.050266	0.474791	0.518859	0.148328	0.149195	0.25798	0.123742	0.393732	0.160516	0.264626
	36	-0.0212835	-0.0338501	0.119922	0.430995	-0.136262	-0.0424253	0.0240552	-0.0717997	0.156831	0.172331	0.0676206	0.396121	0.236289	0.0825592	0.469719	0.261256	0.0876096	0.437715	0.23646	0.212821	0.0161949	0.161673	0.129677	0.470249	0.27686	-0.0759348	0.311437	0.0109021	0.00962585	0.194638	-0.00419179	0.726409	0.416029	-0.0596595	-0.00286296	0.466617	0.0948173	-0.188601	0.00174253	0.437275	0.515729	0.169457	0.167832	0.25343	0.10088	0.402502	0.159519	0.227746
	39	0.0107929	-0.0621808	0.113295	0.431155	-0.128902	-0.0611804	0.0135362	-0.0809015	0.128285	0.140368	0.0520647	0.39853	0.220233	0.0657888	0.520815	0.273385	0.12093	0.4839	0.330881	0.217325	0.062611	0.0286586	0.107228	0.369872	0.177911	-0.18167	0.297082	-0.00872784	0.0341944	0.141821	-0.0423448	0.637661	0.274596	0.147843	0.0543868	0.419084	0.174326	-0.146097	0.0026348	0.441845	0.50392	0.142646	0.0776935	0.240924	0.101014	0.315764	0.201692	0.260215
	42	-0.00469942	-0.0700266	0.13131	0.414924	-0.158515	-0.0564535	0.0446206	-0.0610899	0.146447	0.133695	0.062131	0.369924	0.207181	0.0525074	0.513012	0.236724	0.0943695	0.39342	0.292658	0.185893	0.0608373	-0.000849314	0.0897293	0.322474	0.0491342	-0.0479361	0.217283	0.0191178	0.00203128	0.145831	-0.0744377	0.733138	0.316864	0.143785	-0.104289	0.3255	0.0985377	-0.152307	-0.0331397	0.4026	0.472651	0.134218	0.103253	0.29063	0.110283	0.419988	0.113493	0.19249
	45	-0.0510092	-0.0113568	0.0631571	0.363409	-0.193863	-0.0749617	0.0156395	-0.0817807	0.0829152	0.137828	0.0461604	0.339099	0.21715	0.0539384	0.460708	0.315177	0.134347	0.357619	0.114865	0.212408	0.0451829	0.00422947	0.124067	0.432341	0.180286	-0.0761752	0.21882	-0.0351179	0.0135999	0.195669	-0.0748069	0.543014	0.248	0.138898	-0.00960666	0.347383	0.131883	-0.180362	0.141579	0.404462	0.549073	0.167295	0.0907587	0.28128	0.0711433	0.435269	0.1217	0.208058
	48	-0.0490381	-0.0616012	0.104578	0.317759	-0.162281	-0.0516125	0.0390743	-0.0872657	0.0703144	0.0859353	0.0911168	0.379799	0.224383	0.0510713	0.474385	0.30072	0.0963233	0.395509	0.205142	0.17395	0.0516987	-0.0354712	0.103365	0.499786	0.0668734	-0.0573109	0.164794	-0.0285643	0.0704639	0.0975451	-0.031227	0.62517	0.257701	0.141626	-0.0646951	0.459193	0.0291694	-0.172258	0.0668548	0.380464	0.440244	0.174581	0.0461626	0.256586	0.0750203	0.459675	0.161958	0.111183
	51	-0.00287365	-0.0649481	0.0597806	0.28295	-0.167331	-0.0622029	0.019965	-0.0902934	0.143306	0.125714	0.0666032	0.325578	0.216927	0.113165	0.532875	0.30082	0.0383415	0.425206	0.217414	0.126696	0.035452	-0.0264696	0.0973598	0.336352	0.0631657	-0.0894907	0.216841	-0.0851196	0.0193811	0.113703	-0.0478499	0.591829	0.250812	0.0871641	-0.11003	0.504931	0.143151	-0.205828	-0.0231819	0.342143	0.419134	0.183427	0.0481233	0.257024	0.0579035	0.419831	0.108674	0.200587
	54	0.00922438	-0.0715172	0.10338	0.276203	-0.135022	-0.0510158	0.0353361	-0.101768	-0.0212829	0.094615	0.103106	0.305605	0.226848	0.0504068	0.461395	0.282823	0.0870622	0.411736	0.202622	0.12946	0.00200738	0.0296739	0.143321	0.388331	0.0191204	0.0219893	0.102731	-0.0714097	0.0514928	0.0102766	-0.0991486	0.538243	0.157147	0.132482	-0.00708381	0.448856	0.109476	-0.189079	-0.0329137	0.33039	0.478138	0.189818	0.0230438	0.178951	0.0540672	0.375001	0.0454114	0.111773
	57	-0.0309422	-0.077367	0.0881348	0.236974	-0.159215	-0.0644092	0.0265821	-0.094909	-0.0135703	0.1482	0.0933123	0.308986	0.236035	0.0339462	0.524395	0.317057	0.0671254	0.372771	0.229994	0.0758868	0.0396563	-0.00893729	0.105879	0.390979	0.228188	-0.0784565	0.13573	-0.128345	-0.0102782	0.0582506	-0.10036	0.602761	0.190621	0.0875011	-0.0720368	0.288083	0.0568627	-0.228379	-0.0482588	0.277394	0.550815	0.151711	0.0190631	0.232722	0.0233045	0.397665	0.133799	0.16627
	60	-0.0115819	-0.0559658	0.0741357	0.219524	-0.127054	-0.047718	0.015286	-0.113068	0.0214732	0.11813	0.038927	0.364666	0.211589	0.0224325	0.487968	0.31409	0.0529661	0.314841	0.269013	0.131578	0.0284306	0.042908	0.10575	0.41096	0.0017612	-0.0547658	0.125772	-0.108925	0.0571839	0.0991044	-0.0884186	0.557076	0.1746	0.0708592	-0.0152669	0.384619	0.0426324	-0.244649	0.00560684	0.250366	0.402931	0.174478	0.0680771	0.237063	0.0185899	0.266086	0.123557	0.157251
	63	0.00292408	-0.076985	0.0660549	0.183278	-0.169847	-0.0378489	0.00776414	-0.107034	0.0823333	0.0967855	0.0652684	0.322309	0.219422	0.0867332	0.499275	0.312861	0.0866315	0.286149	0.293882	0.135548	0.0464473	0.0402968	0.111565	0.390722	-0.0941553	0.0298162	0.116754	-0.112483	0.00578198	0.0990955	-0.105215	0.557983	0.276738	-0.00909273	0.0103354	0.313852	0.108873	-0.182511	-0.0387745	0.286836	0.398336	0.178479	0.0368843	0.2603	0.0474296	0.193582	-0.01077	0.172297
	66	0.010613	-0.0683675	0.0577805	0.192212	-0.166256	-0.0497648	0.0274622	-0.106656	0.0417791	0.104895	0.0788317	0.320057	0.202622	0.0976809	0.442689	0.358771	0.0157831	0.292289	0.337492	0.109412	0.0540912	-0.0283847	0.123679	0.287762	-0.123149	-0.0382679	0.0694242	-0.113203	0.0381593	0.0545646	-0.100608	0.457766	0.253524	0.0836976	0.0606748	0.187454	0.0356302	-0.176225	-0.0188835	0.265731	0.351356	0.27738	0.0896204	0.229066	0.0143794	0.398334	0.0843144	0.118746
	69	-0.0364886	-0.0383475	0.0145875	0.165117	-0.198265	-0.0561659	0.00685077	-0.110744	0.124164	0.163588	0.086035	0.25551	0.212337	0.0295552	0.464757	0.282673	0.0617764	0.198118	0.217092	0.121714	0.0608417	-0.0479768	0.0852187	0.296145	-0.146289	-0.132896	0.0567092	-0.0877897	0.0315167	0.0581721	-0.101435	0.569226	0.27144	-0.132248	0.0794752	0.285572	0.100401	-0.257215	-0.0989806	0.286446	0.384156	0.201465	0.0944697	0.240039	-0.00186046	0.2858	0.134428	0.0663025
	72	-0.033613	-0.0428915	0.0748465	0.180887	-0.170618	-0.0632719	0.033765	-0.108953	0.028036	0.0910119	0.0187962	0.298759	0.21849	0.0199623	0.512855	0.277441	0.015351	0.206638	0.232427	0.144272	0.0485053	0.0234347	0.106404	0.277317	-0.164082	-0.109165	0.0382627	-0.0993187	0.0190339	-0.0166999	-0.136262	0.487226	0.141376	0.101665	0.0208277	0.137552	0.0975417	-0.217907	-0.152901	0.172928	0.35892	0.190295	0.0590711	0.230634	0.0281373	0.244184	0.00913653	0.154321
	75	-0.0189334	-0.079283	0.0665166	0.10158	-0.165095	-0.0549593	-0.00357648	-0.0878435	0.0619242	0.0561428	0.0214337	0.255374	0.197845	0.0216932	0.444308	0.342633	0.0685916	0.217742	0.318821	0.181121	0.0396998	-0.0378195	0.102616	0.25967	0.0561601	-0.150157	-0.00422532	-0.101613	0.0639286	-0.0973085	-0.138612	0.372056	0.179083	0.177028	0.0786619	0.180694	0.0859602	-0.255287	-0.104699	0.122652	0.408926	0.176354	0.0799314	0.191969	0.01243	0.250109	0.139597	0.0699045
	78	-0.00230161	-0.115395	0.0257268	0.11233	-0.158651	-0.0424442	0.0421168	-0.101472	0.0805743	0.10562	0.0495395	0.270578	0.212476	-0.00394619	0.476183	0.329924	0.0503964	0.201627	0.248166	0.121157	0.0409465	-0.0760245	0.124902	0.317854	-0.172321	-0.052476	-0.0230868	-0.116206	0.0649386	0.00559663	-0.185488	0.449524	0.268804	-0.0711129	0.132917	0.197108	0.0394822	-0.210771	-0.229319	0.141408	0.385529	0.178357	0.0534679	0.200251	0.0161201	0.253178	0.120167	0.116423
	81	-0.0195407	-0.074662	-0.0632781	0.113183	-0.180176	-0.028324	0.0133801	-0.112299	0.0545014	0.0262554	0.0257093	0.237197	0.227552	-0.0104225	0.433657	0.345717	0.00285399	0.258002	0.154429	0.116442	0.0247869	-0.0219478	0.111565	0.294492	-0.179855	-0.130676	-0.0755563	-0.125027	0.0419959	-0.0444718	-0.159418	0.460054	0.23509	0.00938214	0.126997	0.207288	0.0142699	-0.177417	-0.258799	0.224907	0.407574	0.160882	0.0309493	0.212018	0.0340036	0.292661	0.00232684	0.136721
	84	-0.06031	-0.0972234	0.0141197	0.0841854	-0.165082	-0.0779498	0.016326	-0.0894872	0.182961	0.0278542	0.0339664	0.318621	0.241855	-0.0374798	0.386492	0.347237	0.0197286	0.188684	0.291868	0.117141	0.0102572	0.0111575	0.153899	0.27234	-0.0904912	-0.0600381	-0.068001	-0.0709935	0.0172706	-0.0460293	-0.133992	0.289488	0.118074	0.074868	0.121626	0.261843	-0.00232902	-0.238961	-0.25768	0.0937672	0.386884	0.172981	0.10109	0.234901	0.0335185	0.238405	0.0671892	0.145333
	87	0.0130307	-0.0636468	-0.0159924	0.114425	-0.195885	-0.0567682	0.0266377	-0.108528	0.054438	0.0352178	-0.0202409	0.264205	0.227552	-0.0447296	0.403718	0.348396	-0.0100657	0.211658	0.179216	0.0971526	0.0140588	-0.0131735	0.129564	0.196328	-0.138217	-0.138221	-0.112401	-0.0254848	0.074939	0.0100434	-0.0911086	0.354578	0.204799	-0.0166396	0.139676	0.12451	0.104644	-0.306845	-0.204106	0.133944	0.428826	0.146354	0.0509996	0.147863	0.035661	0.240607	0.0298494	0.129296
	90	0.0257838	-0.0805684	-0.00552517	0.125714	-0.197337	-0.0565018	-0.011918	-0.110628	0.127172	0.0160875	-0.0258943	0.241261	0.228283	-0.0263644	0.409563	0.319736	0.0128275	0.173325	0.169984	0.0921707	0.0245764	-0.0102772	0.145881	0.119283	-0.064516	-0.0890089	-0.188896	-0.131168	0.00960058	0.0386369	-0.153497	0.200096	0.151146	0.0358238	0.00148776	0.152767	-0.000368765	-0.229161	-0.309839	0.0976244	0.412611	0.138823	0.0670654	0.211268	0.0156794	0.259445	0.0389972	0.0762348
	93	-0.0147875	-0.0564398	-0.025898	0.150626	-0.20752	-0.0347093	-0.0206342	-0.114322	0.0747191	0.0520466	-0.0267567	0.189155	0.216956	-0.025859	0.370018	0.334439	0.00730484	0.185313	-0.0296212	0.108519	0.0465506	-0.0669983	0.117111	0.107375	-0.196674	-0.0863466	-0.0893366	-0.0955845	0.0748826	0.058985	-0.0943803	0.238238	0.164426	-0.0447275	0.156615	0.130922	0.064831	-0.26448	-0.22112	0.0564448	0.313194	0.174194	0.0206279	0.256697	0.0240061	0.200617	0.0703777	0.0837376
	96	-0.0438274	-0.111602	-0.00891437	0.0925652	-0.196404	-0.0490589	-0.0270165	-0.108314	0.0720334	0.0415575	0.00279257	0.201973	0.229735	-0.0587543	0.345873	0.260134	-0.0234688	0.188312	0.104212	0.115111	0.0322809	0.0591364	0.0676717	0.235059	-0.128996	-0.197456	-0.209765	-0.128477	0.0419165	0.0224013	-0.130736	0.293584	0.0804391	-0.000217946	0.0488749	0.0315867	0.053728	-0.244637	-0.18856	0.107925	0.327114	0.126876	0.0315082	0.204015	0.0357244	0.37029	0.134501	0.0978346
	99	-0.0105796	-0.0876944	-0.0402238	0.101002	-0.188877	-0.0642923	-0.0103718	-0.124262	0.103172	0.0496578	-0.038864	0.158112	0.216879	-0.107657	0.435154	0.240381	-0.0144667	0.210418	0.0853624	0.121957	0.064866	-0.00920469	0.0920882	0.074179	-0.0947681	-0.150723	-0.0682907	-0.171211	0.057113	0.0311998	-0.0761287	0.369866	0.130168	-0.0454899	0.0972477	0.0606145	0.0849089	-0.285462	-0.242546	0.0742466	0.348323	0.174417	0.085156	0.188307	0.0356963	0.235904	0.135863	0.128514
	102	-0.0116596	-0.104413	-0.0026475	0.117663	-0.193039	-0.0412854	-0.0126195	-0.118687	0.0488489	0.0139174	-0.0599074	0.215108	0.19765	-0.0228739	0.36804	0.252144	0.00529686	0.159362	0.0958755	0.128346	0.0504713	-0.0629162	0.0923388	0.116837	-0.0767655	-0.206505	-0.192112	-0.134986	0.0293782	-0.109758	-0.112632	0.217611	0.147054	-0.133246	0.00149063	0.0869522	0.063313	-0.291081	-0.345324	0.0613036	0.358182	0.144756	0.0749501	0.176216	0.0453234	0.356092	0.058707	0.0492725
	105	-0.0281518	-0.0678543	-0.0105504	0.0897789	-0.198962	-0.0443786	-0.00502707	-0.118766	0.0451165	0.0225735	-0.0384188	0.208993	0.21728	-0.043731	0.396928	0.153159	0.0157805	0.207166	0.0208599	0.0712974	0.00623527	0.013022	0.110494	0.163551	-0.186362	-0.182117	-0.143403	-0.166283	0.0120212	-0.0175553	-0.112688	0.279441	0.0820344	-0.102352	0.0153621	0.00266726	-0.00483727	-0.266763	-0.369268	0.0827514	0.256575	0.0833411	0.0496717	0.263565	0.0691674	0.263974	0.177383	0.108854
	108	-0.0389887	-0.0600048	-0.0167214	0.0865408	-0.220428	-0.0597505	-0.0102555	-0.113676	0.00787287	0.0527522	-0.0260192	0.203041	0.210121	-0.0374558	0.441348	0.211395	0.0407359	0.223407	-0.00888089	0.0607738	0.0431626	0.0333773	0.0768795	0.0698536	-0.307134	-0.0955241	-0.155117	-0.116159	0.0294053	-0.134385	-0.12735	0.224514	0.136113	0.0282352	0.126129	0.0686759	0.0882415	-0.247365	-0.315619	0.109548	0.314431	0.0520936	0.0333347	0.267029	0.0350282	0.207743	0.172397	0.114459
	111	-0.0624528	-0.0748075	-0.0791357	0.0502157	-0.212809	-0.0820753	0.00547158	-0.124961	0.0451716	-0.0144648	-0.0325672	0.181997	0.179574	-0.0739366	0.381331	0.232211	-0.0205923	0.219995	0.101711	0.0812127	0.0159986	0.0114276	0.0889224	0.174901	-0.391307	-0.060248	-0.219594	-0.142824	0.0413959	-0.0105997	-0.150137	0.192792	0.27425	0.0110973	0.0859566	0.058148	0.0343842	-0.227522	-0.222551	0.0420506	0.356625	0.104549	0.0586069	0.183517	0.0479934	0.235091	0.110515	0.176629
	114	-0.00216473	-0.0775604	-0.0631667	0.0688026	-0.214298	-0.0557662	-0.0260414	-0.119043	0.0569931	5.3302e-06	-0.0542665	0.180567	0.206868	-0.06765	0.395493	0.187752	-0.0315713	0.0955206	-0.0547825	0.0627183	0.0498824	-0.105962	0.0941384	0.131286	-0.298875	-0.032816	-0.0664488	-0.133648	0.0337705	0.121149	-0.108963	0.235434	0.152048	0.0626231	-0.0436674	0.0992847	0.0292912	-0.283142	-0.32529	0.0663454	0.39064	0.0640908	0.0773711	0.283624	0.0211479	0.178446	0.149848	0.0550685
	117	-0.0859966	-0.0848631	-0.0761375	0.0302006	-0.184582	-0.0248302	-0.0179081	-0.139187	0.0119237	0.00823746	-0.0497507	0.183912	0.194262	-0.0925551	0.396455	0.228897	-0.0303543	0.184049	-0.06183	0.0789814	0.0266169	-0.0118184	0.0854316	0.00202445	-0.264714	-0.113323	-0.130894	-0.155299	0.0761371	0.0273851	-0.13616	0.100108	0.25011	-0.0332621	0.0485069	0.00419305	0.0918839	-0.240528	-0.282967	0.0467523	0.316314	0.0620756	0.0553433	0.243607	0.0389773	0.213547	0.24227	0.0753362
	120	0.00452815	-0.0855825	-0.0715953	0.00515364	-0.197066	-0.0489342	-0.0420876	-0.127867	0.00309154	-0.00430927	-0.0467908	0.154235	0.167441	-0.0758955	0.447502	0.215268	-0.0349671	0.164184	-0.0952788	0.104304	0.0328956	-0.067513	0.0417327	0.109633	-0.275266	-0.169047	-0.149578	-0.169386	0.0504371	0.0434079	-0.0961416	0.0968923	0.286939	-0.0930483	0.0368653	-0.0293785	0.0794926	-0.299025	-0.331201	0.0921025	0.304315	0.0785307	0.111197	0.181372	-0.00105801	0.0736588	0.23512	0.136527
	123	-0.0161921	-0.0484782	-0.0549869	0.0944798	-0.200866	-0.0582763	0.0046129	-0.121151	-0.0246324	-0.0145868	-0.0699695	0.130815	0.173859	-0.0554477	0.464772	0.205359	-0.00655496	0.172234	0.0179992	0.116624	0.0438906	-0.0197368	0.109705	0.0216214	-0.218866	-0.134119	-0.0599612	-0.115069	0.031554	0.0388605	-0.0888088	0.177301	0.319578	-0.00555695	0.0848661	0.0176553	0.0309607	-0.275131	-0.259658	0.010491	0.286104	0.0869095	0.0391688	0.223923	0.0460559	0.0908987	0.0900399	0.0489768
	126	-0.00740307	-0.0548648	-0.0392017	0.0657063	-0.191702	-0.0573941	0.00750108	-0.135705	0.113192	-0.0238018	-0.0614262	0.138764	0.158433	-0.0385626	0.42636	0.226849	-0.0032674	0.143366	-0.176839	0.144568	0.040451	0.00545476	0.0679773	0.0904829	-0.273332	-0.169318	-0.119293	-0.103129	0.0955701	-0.0294115	-0.0937475	0.0218971	0.247023	-0.101251	0.0631735	-0.000648284	-0.00251791	-0.24652	-0.288378	0.0345442	0.438834	0.135434	-0.00141312	0.319131	0.0215755	0.0718404	0.128894	0.1387
	129	-0.018583	-0.0582465	-0.0960008	0.130341	-0.175281	-0.0401964	-0.00544019	-0.128042	0.0835575	-0.00563855	-0.0758658	0.0729343	0.16344	-0.0453595	0.366048	0.122161	-0.021978	0.0852377	-0.130575	0.078047	-0.000637049	0.0039871	0.0888207	0.0758998	-0.401253	-0.107391	-0.0312379	-0.132639	0.00366059	-0.0575171	-0.135393	-0.0239265	0.215409	-0.0112332	0.0509408	-0.0329509	0.0321069	-0.291492	-0.218174	-0.0286652	0.356243	0.0634889	0.0633231	0.21735	0.0288078	0.0749025	0.14991	0.0935639
	132	-0.00181289	0.0223246	-0.0452695	0.0601054	-0.186021	-0.0368174	0.0524722	-0.111085	-0.00704594	-0.0151709	-0.0263379	0.111726	0.166547	-0.0646225	0.40989	0.179521	0.00542408	0.147094	0.0343087	0.0721163	0.0127045	-0.0699317	0.108853	0.0528026	-0.301906	-0.0898438	-0.092064	-0.131953	0.00390252	0.023255	-0.140379	-0.0675487	0.341466	-0.156617	0.113291	-0.0333159	-0.042654	-0.292064	-0.353333	-0.0311322	0.225809	0.145155	0.0705408	0.215982	0.0484885	0.131664	0.053666	0.0899591
	135	-0.0237353	-0.013623	-0.0342983	0.0652112	-0.194371	-0.0620691	0.00288744	-0.141607	0.0321642	-0.0408978	-0.07188	0.102593	0.161867	-0.0279449	0.373421	0.139867	-0.00200811	0.0998047	0.0868027	0.0808126	0.0497019	0.0280115	0.062094	-0.0106586	-0.19633	-0.0583116	-0.0673939	-0.130586	-0.00111276	-0.0577652	-0.120585	0.154017	0.244416	-0.0632871	0.00137472	0.0425583	0.0892304	-0.248797	-0.258965	0.00300389	0.322534	0.0711416	0.0905158	0.243683	-0.000922192	0.13509	0.104051	0.116054
	138	-0.0258031	0.00452855	-0.13204	0.0918392	-0.183645	-0.0380263	0.00448685	-0.119777	-0.024205	0.00540914	-0.0590429	0.160685	0.18529	-0.0501114	0.368587	0.0968327	-0.0072662	0.0747988	-0.0398307	0.095513	0.0555514	-0.010295	0.0591897	0.0449537	-0.218039	-0.10117	-0.010655	-0.150035	0.0354616	0.0132498	-0.157281	-0.0417145	0.312673	-0.30368	-0.042313	-0.0253525	0.0789388	-0.25629	-0.291927	0.0527894	0.286145	0.102518	0.0612911	0.173819	-0.00658559	0.0937382	0.0725965	0.0870831
	141	0.0561697	-0.0497731	-0.0617353	0.0464257	-0.205534	-0.0525207	-0.00114018	-0.13607	0.0823117	-0.0612328	-0.092509	0.0785513	0.156479	0.0255658	0.409158	0.0815307	-0.00485101	0.0713674	-0.0590253	0.134673	0.0441853	-0.0192238	0.0611263	0.0270964	-0.258266	-0.0968183	-0.150306	-0.146973	0.0185994	-0.0893568	-0.10441	-0.0314797	0.235844	-0.236113	0.0630471	-0.014177	0.054177	-0.261376	-0.384397	0.0405707	0.314308	0.128286	0.0760679	0.154361	0.0216175	0.142805	-0.0479635	0.0913954
	144	0.0103844	-0.014557	-0.101271	0.0742831	-0.204832	-0.0321282	0.0318867	-0.102033	-0.0404	-0.0117222	-0.085796	0.105641	0.160496	-0.0780063	0.410881	0.0984392	-0.0289993	0.1152	-0.0418651	0.036074	0.0243855	0.00705411	0.0819645	0.0668107	-0.0353678	-0.105066	-0.160255	-0.132315	-0.0173333	-0.0691301	-0.109988	0.0279522	0.251819	-0.263232	-0.00758003	-0.0544208	0.076934	-0.216433	-0.231237	-0.0491952	0.297821	0.0829365	0.0567046	0.132136	0.00616556	0.138928	-0.00577114	0.0674532
	147	-0.0102908	-0.0508006	-0.0826847	0.0659745	-0.191673	-0.0449201	0.027622	-0.108772	0.0357604	-0.0406216	-0.0592356	0.144852	0.162064	-0.0569122	0.374631	0.112008	-0.0267671	0.0935856	-0.0896633	0.0922053	0.0326144	-0.04474	0.0449799	0.0783461	-0.337937	-0.0846964	-0.0721576	-0.0932338	-0.0162473	0.0319524	-0.142911	0.117704	0.193561	-0.0692921	-0.0487231	-0.0414472	0.0891536	-0.286077	-0.234197	-0.0371461	0.346132	0.0490907	0.0662003	0.159084	0.0254014	0.0681557	0.0745777	0.126037
	150	0.00297023	-0.00432846	-0.0954422	0.0680925	-0.168751	-0.0345246	-0.00565019	-0.113701	-0.0427399	-0.0513754	-0.0354879	0.132927	0.156764	-0.0312518	0.38535	0.0142101	-0.0114545	0.0704373	-0.0547113	0.0824934	0.0382446	-0.0183182	0.073353	0.0904098	-0.313597	-0.156952	0.0411427	-0.131442	-0.0224073	-0.0223055	-0.103281	-0.0639723	0.250885	-0.09603	0.0175622	-0.116833	0.052526	-0.235293	-0.259061	0.0340284	0.368894	0.125063	0.00828051	0.152269	-0.00872337	0.0987334	-0.0317715	0.0900941
	153	0.0080242	0.0108797	-0.0819778	0.0950316	-0.220479	-0.0464512	0.0318543	-0.116554	0.0761806	-0.0321574	-0.0733775	0.134264	0.169735	-0.0180519	0.385847	0.0861619	-0.00747534	0.038869	-0.153822	0.0486029	0.02774	-0.0114495	0.0944878	0.146212	-0.276379	-0.129313	-0.0564122	-0.165493	0.0409505	-0.0334232	-0.154506	-0.0764885	0.371058	-0.213473	0.0278469	-0.0617797	0.0825488	-0.228379	-0.450199	0.0162168	0.33864	0.0802663	-0.036113	0.185141	0.00450952	0.0509256	-0.0429871	0.0769854
	156	0.0273682	-0.0462702	-0.0979183	0.00914518	-0.251165	-0.0359931	0.0134909	-0.115319	-0.0206419	-0.018278	-0.0896994	0.141327	0.141885	-0.0386484	0.390032	0.0712931	0.00495783	0.166386	-0.112171	0.0621171	-0.000306713	0.0402532	0.0701946	0.108272	-0.372334	-0.115933	-0.0345557	-0.148879	0.00937441	-0.0692615	-0.159016	-0.0696224	0.336444	-0.208418	-9.89235e-05	-0.00724618	0.0371592	-0.209627	-0.243594	-0.00790911	0.310156	0.0967109	0.00517035	0.187871	0.00824868	0.129563	-0.030771	0.0785612
	159	0.00331095	-0.0244578	-0.0973867	0.0239503	-0.23715	-0.0379314	-0.00387708	-0.121199	0.00523967	-0.037093	-0.056272	0.137431	0.171274	-0.000740488	0.410206	0.120239	-0.00912603	0.0593735	0.0132057	0.0484693	0.0074945	-0.0460909	0.0400005	0.147535	-0.283689	-0.145595	-0.0389392	-0.125026	0.0570325	-0.124591	-0.121261	-0.0867381	0.25367	-0.201092	-0.0148141	-0.126277	0.0315116	-0.263877	-0.347241	-0.0298632	0.332891	0.10614	0.0298123	0.10144	0.0384577	0.0759124	0.0109585	0.0835348
	162	-0.011729	-0.0255954	-0.110357	0.0680935	-0.232774	-0.0489635	-0.00458063	-0.095799	-0.00305207	-0.0179482	-0.0405966	0.138317	0.148196	-0.0381209	0.388149	0.0566933	0.0207581	0.111972	-0.128255	0.0502972	0.0291359	-0.0337668	0.0150191	0.0708502	-0.294288	-0.133685	-0.0148235	-0.169547	0.0413527	-0.108405	-0.140576	-0.156994	0.262096	-0.217477	-0.0122512	-0.0642766	0.0734487	-0.212255	-0.330983	0.0660218	0.303196	0.111756	0.00995066	0.194436	-6.68734e-06	0.0798292	-0.0539062	0.114044
	165	-0.0157505	-0.0126201	-0.0908576	0.00619686	-0.217652	-0.0386346	0.0333826	-0.103695	-0.0162165	-0.0146655	-0.0749622	0.0936207	0.146494	0.0152017	0.397002	0.0707712	-0.00677197	0.0580318	-0.263493	0.0351224	0.0407279	0.0427541	0.038652	0.110551	-0.370608	-0.183539	-0.100962	-0.161137	0.0348184	-0.0970177	-0.138625	-0.223861	0.248505	-0.254282	0.0867011	-0.0381847	0.0155866	-0.265532	-0.325498	0.033442	0.325962	0.0734122	0.0346539	0.155913	-0.00623435	0.137809	-0.0676323	0.0859733
	168	-0.00234047	-0.0089237	-0.0618423	0.0778402	-0.204674	-0.0151556	0.0234696	-0.111248	-0.011625	-0.0514929	-0.0808351	0.129789	0.163782	0.00494258	0.387154	0.0668326	0.0308042	0.0661971	-0.0960385	0.0409878	0.0367955	-0.00316498	0.049815	0.0833742	-0.368574	-0.214955	-0.125444	-0.19042	0.058103	-0.0553388	-0.199484	-0.115239	0.234081	-0.15333	0.0424693	0.00660255	-0.00443721	-0.29842	-0.282732	-0.0713275	0.315106	0.141183	0.0590107	0.145297	0.0319547	0.155545	-0.073329	0.103021
	171	0.0302027	-0.00385278	-0.12194	0.0397414	-0.166932	-0.0178765	0.0133222	-0.113277	0.0307183	-0.00845818	-0.0530141	0.0956646	0.149485	-0.0610476	0.36946	0.082487	-0.00556126	0.0359234	-0.209218	0.0669579	-0.00204484	-0.0117599	0.0454919	0.152715	-0.445335	-0.212355	-0.119547	-0.201771	0.0128692	-0.121089	-0.188569	-0.0488637	0.191429	-0.0503962	0.0886249	-0.122806	0.075935	-0.304767	-0.274098	0.0251411	0.285838	0.157798	-0.0111976	0.234053	0.0199904	0.181023	-0.0479714	0.14363
	174	0.0297813	-0.049282	-0.0740605	0.0513478	-0.190036	-0.0279746	0.00346639	-0.0984671	0.0263597	0.00629111	-0.0803988	0.116822	0.153186	-0.0325107	0.390412	0.0557173	0.0186799	0.10261	-0.308624	0.105009	0.0347357	0.0509949	0.00733583	0.13884	-0.33844	-0.162792	-0.0747386	-0.16344	0.0459287	-0.128294	-0.191515	-0.091527	0.174268	-0.210842	0.0828331	-0.0714148	-0.017428	-0.300519	-0.323412	0.00404266	0.27054	0.11608	0.0652107	0.202103	0.00331289	0.133666	-0.0726157	0.0688208
	177	0.0160734	-0.0372141	-0.117426	0.0853602	-0.203299	-0.0291569	0.0464169	-0.103985	0.0188379	0.0094004	-0.025516	0.0960196	0.133158	0.00581431	0.377652	0.0372205	0.00684793	0.0173906	-0.200272	0.031761	0.0229329	0.035385	0.0479946	0.0410653	-0.302633	-0.131334	-0.0993484	-0.181017	0.0158883	-0.124845	-0.191594	-0.171242	0.158335	-0.277772	0.116594	-0.0564301	-0.0380481	-0.317048	-0.420745	-0.0669176	0.387226	0.10361	0.0154642	0.259052	0.0216788	0.136899	-0.052343	0.0873613
	180	-0.0209172	-0.0284015	-0.132339	0.0742718	-0.224047	-0.0269363	-0.0137069	-0.103759	0.0174101	-0.0181573	-0.0371352	0.105997	0.159669	-0.00187834	0.426829	0.0580221	-0.0213631	0.050164	-0.235321	0.0288734	0.00889621	-0.0375402	0.0195422	0.16385	-0.183061	-0.223925	-0.140298	-0.151975	0.0133559	-0.0441064	-0.144437	-0.170465	0.279926	-0.237954	0.0158146	-0.117881	0.0362873	-0.271266	-0.342345	-0.0208951	0.375217	0.126718	0.0219688	0.143777	-0.033557	0.125806	-0.0148584	0.0679565
[truncated: 58 more columns]

## Sheet: Figure3G
Figure 3G
	Time of max fluo signal (s)
	PM	IRSp53WT
	0.9	24.3
	0.6	8.7
	0	22.5
	3.9	20.1
	4.2	5.7
	1.66667	2.33333
	4.125	14.25
	1.2	1.8
	3.6	3.6
	13.6667	34.6667
	3.9	33.9
	15	34.875
	5.1	26.4
	0.333333	20
	0.666667	7
	14.6667	25.6667
	5	19.3333
	3.6	25.8
	13.8	23.1
	3	12
	9	21
	32.4	80.1
	6.9	16.5
	1.2	32.7
	1.875	16.125
	18	4.5
	1.8	10.2
	12	25.5
	1.8	20.7
	17	29
	0	30.6
	3.6	25.5
	0.6	2.7
	1.2	11.7
	0.9	7.8
	2.4	42.3
	0	34.5
	5.4	51
	0.6	3.9
	2.7	28.2
	0.9	17.1
	0	11.4
	0	5.66667
	16.5	34.8
	5.7	13.8
	0	3.33333
	0	9
	0.333333	3
	1.2	6.6
	3	11.7
	3.3	23.1
	3.3	9

## Sheet: Figure3I
Figure 3I
	Fluorescence versus time (s)
	Time (s)	DIBAR-GFP												PM
	0	0.075249	0.288545	0.222808	0.164988	0.471553	0.281625	0.262314	0.727464	0.411567	0.341097	0.197283	0.542564	0.147925	1.07376	0.520989	0.623201	2.03522	1.05526	2.8779	2.39705	1.80241	0.730898	0.930595	1.578
	3	0.0799303	0.273262	0.239299	0.237584	0.449936	0.238002	0.296752	0.732589	0.481636	0.473304	0.290855	0.619822	0.151746	0.912692	0.96039	0.749585	1.60765	0.787026	2.30081	2.19493	1.68986	0.929414	1.0737	1.48523
	6	0.0832211	0.265747	0.221455	0.291663	0.476759	0.360806	0.362279	0.782234	0.455479	0.587493	0.274899	0.574991	0.135885	0.783871	1.04744	0.639467	1.56617	1.01661	2.1064	2.24313	1.78574	1.08611	1.20257	1.28417
	9	0.0917249	0.233237	0.230926	0.275036	0.488658	0.32104	0.350054	0.82246	0.428069	0.658129	0.363446	0.643455	0.150145	0.727527	0.998371	0.662142	1.34585	1.28115	1.9959	2.35745	1.62701	1.16247	0.530346	1.3242
	12	0.0980071	0.225475	0.219791	0.313305	0.486535	0.416603	0.386547	0.81676	0.250011	0.714936	0.424257	0.655877	0.150227	0.599948	0.884055	0.594772	1.22913	1.18465	2.03858	2.30846	1.13122	1.27502	0.994247	1.39235
	15	0.0937717	0.242133	0.234569	0.314539	0.465491	0.404359	0.380744	0.724064	0.3532	0.68159	0.491265	0.612863	0.152419	0.556509	0.915229	0.583226	1.11807	0.98424	1.92606	1.81964	1.54812	1.09886	1.26805	1.32749
	18	0.0996273	0.225144	0.245648	0.352624	0.468492	0.406223	0.448046	0.762251	0.444375	0.701634	0.563779	0.623661	0.146452	0.452127	0.878758	0.605357	1.09936	0.966711	1.84513	1.8578	1.54363	1.16565	1.26717	1.18572
	21	0.0972051	0.186404	0.247115	0.370069	0.504005	0.409793	0.387434	0.735497	0.438344	0.818915	0.634124	0.68002	0.149156	0.374439	0.916223	0.622241	1.11071	0.98422	1.78889	1.88466	1.43722	1.2769	1.21273	1.07947
	24	0.0997173	0.21909	0.325914	0.33269	0.500849	0.399602	0.48826	0.766944	0.449652	0.873336	0.641853	0.662465	0.135702	0.327207	0.867187	0.628263	1.10122	0.875937	1.77187	1.88208	1.34162	1.29012	1.2813	1.10597
	27	0.0951885	0.183672	0.315039	0.382562	0.449951	0.372202	0.411537	0.785684	0.399566	0.925755	0.655364	0.707137	0.130592	0.274856	0.797729	0.634973	1.08397	0.773178	1.68169	1.92732	1.3236	1.07762	1.22801	1.04664
	30	0.100763	0.170887	0.291957	0.383952	0.470722	0.350576	0.448976	0.806471	0.427072	0.971021	0.681368	0.725931	0.139603	0.242037	0.776178	0.622826	1.08815	0.756523	1.72418	1.94722	1.1047	1.21274	1.26023	1.03875
	33	0.0962466	0.149851	0.260292	0.345155	0.451913	0.356793	0.491089	0.805701	0.458509	1.01136	0.691702	0.784111	0.139258	0.222479	0.765661	0.486445	1.04491	0.757143	1.74127	1.93132	0.963116	1.25092	1.27088	1.05619
	36	0.0973521	0.139796	0.260606	0.360972	0.471318	0.364333	0.53254	0.841126	0.421268	1.03073	0.730948	0.778468	0.134002	0.213178	0.749199	0.503014	0.860194	0.724931	1.56915	1.90732	0.956207	1.25377	1.19017	0.969926
	39	0.102856	0.163508	0.311945	0.3813	0.437647	0.332992	0.543694	0.818596	0.389906	1.08742	0.742129	0.779231	0.128248	0.178199	0.631484	0.482442	0.833741	0.719558	1.60418	1.9302	0.91525	1.24858	1.21563	0.965123
	42	0.0993038	0.16114	0.276729	0.341591	0.455836	0.347158	0.572705	0.885266	0.405607	1.0825	0.750248	0.772256	0.116049	0.176904	0.540517	0.45205	0.791505	0.687166	1.59448	1.90001	0.916519	1.08702	1.23123	0.915799
	45	0.100092	0.156833	0.257724	0.35254	0.425261	0.348222	0.574652	0.870718	0.41492	1.02798	0.787974	0.747159	0.117177	0.175325	0.515594	0.444815	0.721538	0.658248	1.61995	1.89323	0.808174	1.11493	1.2126	0.86416
	48	0.0908666	0.163197	0.18591	0.369539	0.405105	0.330553	0.530401	0.840638	0.401598	1.04434	0.820176	0.742147	0.113804	0.164497	0.451298	0.371417	0.682514	0.649637	1.50673	1.86697	0.774516	0.960855	1.24026	0.825566
	51	0.102221	0.153675	0.246231	0.382166	0.381176	0.335411	0.542533	0.844429	0.32268	1.02473	0.80052	0.731829	0.108112	0.156773	0.396876	0.401805	0.597823	0.604919	1.58622	1.84732	0.707656	0.883911	1.17206	0.827861
	54	0.103043	0.181144	0.262239	0.370796	0.41942	0.326046	0.609614	0.894846	0.299557	1.04134	0.810526	0.696048	0.101067	0.160758	0.369031	0.383724	0.579979	0.572967	1.53539	1.86293	0.66158	0.85598	1.20128	0.729214
	57	0.0947412	0.183732	0.212212	0.387762	0.396786	0.288812	0.580501	0.925282	0.313927	1.04924	0.797531	0.630991	0.0947597	0.158192	0.341054	0.411952	0.544196	0.538007	1.43875	1.79504	0.629621	0.818545	1.14826	0.65555
	60	0.090652	0.187065	0.199947	0.402645	0.368173	0.321565	0.628511	0.889275	0.30083	1.02714	0.774778	0.588076	0.0921897	0.150235	0.313948	0.402923	0.494439	0.499793	1.36832	1.74421	0.578528	0.813144	1.13424	0.622794
	63	0.0854228	0.185115	0.22875	0.396313	0.376422	0.278241	0.570378	0.910562	0.235555	1.02084	0.795957	0.581854	0.0806027	0.138512	0.306064	0.413087	0.505971	0.470756	1.25768	1.72624	0.520155	0.807271	1.14706	0.603654
	66	0.0855513	0.168776	0.173496	0.362999	0.344048	0.271682	0.539552	0.879811	0.238721	1.06987	0.798011	0.584864	0.0776806	0.133244	0.275454	0.406181	0.45525	0.4187	1.14098	1.67976	0.489744	0.82983	1.12786	0.601831
	69	0.0816742	0.194982	0.20945	0.418417	0.321809	0.251067	0.55698	0.899925	0.213097	1.08494	0.784107	0.566495	0.0773982	0.132101	0.234286	0.401314	0.437047	0.378639	1.15275	1.53398	0.440347	0.837487	1.04588	0.555886
	72	0.0804967	0.170433	0.165122	0.391299	0.347825	0.22107	0.560142	0.852221	0.202424	1.01497	0.791876	0.569434	0.0700154	0.107488	0.229979	0.385645	0.41137	0.322147	1.02306	1.46293	0.438128	0.775101	1.02966	0.53823
	75	0.0804065	0.196188	0.152476	0.366263	0.303164	0.229942	0.555958	0.881002	0.154084	0.918902	0.78576	0.6083	0.0599421	0.105684	0.193989	0.382854	0.388385	0.29927	0.982276	1.43537	0.378241	0.665833	1.00585	0.552744
	78	0.0798507	0.186472	0.144867	0.396333	0.289643	0.243016	0.517165	0.847678	0.14236	0.974272	0.764383	0.583945	0.0624462	0.0987016	0.198067	0.362693	0.363834	0.261438	0.927687	1.44201	0.346596	0.746318	0.980027	0.538092
	81	0.0792669	0.194561	0.135973	0.38805	0.254216	0.250112	0.510407	0.829601	0.138191	0.989597	0.735764	0.570674	0.0568428	0.118002	0.206929	0.356058	0.363286	0.230253	0.905454	1.39945	0.299446	0.734283	0.940206	0.489135
	84	0.0774601	0.193666	0.0939139	0.413232	0.269283	0.283115	0.53288	0.851881	0.148952	1.03591	0.690648	0.539856	0.0564515	0.121455	0.190686	0.349817	0.329334	0.221259	0.848534	1.40241	0.300905	0.742638	0.894804	0.476235
	87	0.0759425	0.185767	0.124919	0.387659	0.285888	0.200059	0.470057	0.843199	0.0982403	1.05721	0.649838	0.519756	0.0536013	0.131196	0.209198	0.327235	0.34297	0.224098	0.790338	1.42038	0.294864	0.740688	0.863168	0.47852
	90	0.0669624	0.181845	0.129307	0.354617	0.246512	0.202439	0.394027	0.822579	0.116826	1.07476	0.623539	0.536502	0.0501037	0.100895	0.160003	0.316029	0.334681	0.233192	0.657859	1.33504	0.203118	0.76929	0.784322	0.45385
	93	0.0679791	0.191265	0.10057	0.366192	0.245225	0.176046	0.339242	0.878551	0.118264	1.05866	0.578541	0.5577	0.0483992	0.100691	0.167148	0.2992	0.255646	0.222199	0.581474	1.37863	0.195309	0.770359	0.777178	0.434979
	96	0.0631766	0.162515	0.0877998	0.36594	0.251724	0.211659	0.328069	0.868618	0.0960772	1.01381	0.574737	0.532887	0.041831	0.0947045	0.163111	0.280768	0.252785	0.191272	0.51367	1.35012	0.197039	0.758153	0.738392	0.415338
	99	0.0624975	0.172395	0.0917757	0.33547	0.234522	0.18249	0.29914	0.873411	0.0903335	1.01888	0.555325	0.454573	0.0386072	0.103586	0.15663	0.281726	0.248853	0.189698	0.466754	1.33602	0.189714	0.613066	0.695108	0.373072
	102	0.0619022	0.164275	0.142876	0.345821	0.242918	0.197747	0.233784	0.90033	0.132469	1.01178	0.59214	0.475241	0.0380162	0.109965	0.178728	0.267235	0.234427	0.166312	0.451224	1.3405	0.155426	0.610226	0.672757	0.301825
	105	0.0590661	0.176931	0.0722194	0.293674	0.23733	0.158139	0.245279	0.847735	0.18693	0.959649	0.525482	0.400935	0.0372844	0.0947886	0.179109	0.250583	0.249931	0.162259	0.391848	1.33574	0.154625	0.532797	0.566912	0.351091
	108	0.0541892	0.188992	0.108253	0.329858	0.221199	0.173514	0.221943	0.865692	0.176853	0.939065	0.527021	0.412194	0.0327717	0.115023	0.181209	0.253034	0.236608	0.137753	0.392246	1.31851	0.116185	0.468618	0.597281	0.363946
	111	0.0503182	0.16118	0.0911279	0.307385	0.180462	0.175562	0.170287	0.860387	0.176702	0.885727	0.503277	0.432157	0.0314888	0.117414	0.157255	0.234399	0.227341	0.133754	0.395336	1.31299	0.0672731	0.476705	0.590607	0.330766
	114	0.0480377	0.174315	0.120403	0.326592	0.225485	0.171594	0.134738	0.832514	0.17194	0.863121	0.501412	0.461814	0.0287461	0.121137	0.134243	0.242565	0.230866	0.141324	0.339988	1.31328	0.0647044	0.460701	0.614975	0.313446
	117	0.0479093	0.176775	0.0649935	0.327091	0.224332	0.174244	0.110076	0.816533	0.152553	0.836442	0.493461	0.464886	0.0275152	0.151027	0.136785	0.235957	0.232226	0.143981	0.358743	1.30286	0.0764967	0.452088	0.634909	0.298645
	120	0.0505785	0.164826	0.0541708	0.300485	0.206915	0.173511	0.0709609	0.82214	0.169955	0.8361	0.492978	0.477212	0.0218776	0.15089	0.152751	0.213694	0.216416	0.183409	0.2798	1.27291	0.0685074	0.418033	0.610995	0.30323
	123	0.0485102	0.181871	0.071639	0.326757	0.181325	0.187281	0.0724061	0.836473	0.12031	0.759094	0.471013	0.469383	0.0177243	0.134796	0.132868	0.218214	0.215531	0.15539	0.245233	1.25284	0.0585041	0.383565	0.624608	0.271303
	126	0.0463512	0.168826	0.0332131	0.262286	0.195744	0.16797	0.0645436	0.804191	0.109432	0.84355	0.44685	0.465057	0.0178038	0.1069	0.121614	0.225854	0.197718	0.157327	0.208753	1.18336	0.0419087	0.414886	0.598724	0.262358
	129	0.0433509	0.174175	0.0851536	0.257573	0.16264	0.17233	0.00567396	0.770118	0.104426	0.746066	0.435034	0.434315	0.0209968	0.113036	0.119813	0.241863	0.204247	0.154604	0.144881	1.16889	0.0548233	0.403813	0.598269	0.251636
	132	0.0462379	0.174973	0.0898635	0.267409	0.13827	0.153726	-0.000512497	0.770651	0.0754262	0.680593	0.409675	0.400219	0.0213448	0.120607	0.126054	0.223679	0.197409	0.140546	0.118154	1.17393	0.0607156	0.405832	0.595945	0.285952
	135	0.0373569	0.189701	0.0722104	0.26419	0.176444	0.187826	-0.00299836	0.766343	0.0878938	0.657959	0.395387	0.370517	0.016877	0.142275	0.124266	0.224399	0.200901	0.105647	0.105642	1.10815	0.0824371	0.395878	0.395715	0.256329
	138	0.0477155	0.175034	0.0657749	0.259732	0.210574	0.17888	-0.017112	0.732166	0.147812	0.713573	0.415768	0.372801	0.0109861	0.136256	0.144052	0.224078	0.173072	0.104435	0.0766696	1.07659	0.0646161	0.371831	0.517683	0.283681
	141	0.0370971	0.176854	0.0967514	0.221179	0.217785	0.1704	-0.0568655	0.716785	0.110559	0.717508	0.427967	0.344831	0.0102881	0.166438	0.126655	0.208402	0.158786	0.0646694	0.0547157	1.00059	0.0452524	0.355497	0.490419	0.265922
	144	0.0400555	0.198286	0.0690478	0.260509	0.179927	0.174202	-0.0325743	0.678856	0.0825557	0.75618	0.407318	0.296152	0.0099	0.148901	0.125536	0.203184	0.148338	0.0916401	0.0716194	0.975469	0.0631952	0.368979	0.490008	0.234975
	147	0.0422559	0.204641	0.0671858	0.271886	0.213467	0.163156	-0.0902892	0.633789	0.100023	0.658485	0.393937	0.275937	0.00677676	0.166241	0.115097	0.181665	0.141207	0.0641421	0.0675465	0.97464	0.0792048	0.416809	0.475627	0.195005
	150	0.0361239	0.184449	0.0640996	0.252454	0.22277	0.185821	-0.0529039	0.612416	0.056317	0.635021	0.378894	0.229483	0.00791801	0.163936	0.0887702	0.202872	0.129646	0.0791972	0.091433	0.960117	0.0373781	0.347269	0.438439	0.188591
	153	0.0390802	0.193986	0.0508472	0.262233	0.158771	0.209197	-0.0819995	0.612785	0.11109	0.681812	0.371572	0.248461	0.00975948	0.173391	0.106865	0.17298	0.145247	0.101983	0.0712483	0.92242	0.0435659	0.339692	0.39305	0.161078
	156	0.032488	0.202856	0.0450878	0.27613	0.116552	0.154344	-0.053327	0.555592	0.0943808	0.640049	0.339081	0.263888	0.00653592	0.158067	0.121866	0.188646	0.131537	0.110608	0.070444	0.885963	0.0438034	0.366852	0.385669	0.174792
	159	0.0328696	0.205829	0.0407477	0.276412	0.18121	0.148765	-0.102903	0.553289	0.061592	0.618916	0.344383	0.274143	0.00840812	0.178036	0.134717	0.184939	0.126817	0.1302	0.101462	0.861555	0.0680677	0.364367	0.373242	0.201109
	162	0.0338045	0.193697	0.0810348	0.236588	0.154722	0.158469	-0.0801746	0.569339	0.0896634	0.634309	0.313555	0.260726	0.0121738	0.164342	0.13194	0.160667	0.128669	0.123338	0.115706	0.846295	0.0525176	0.336035	0.36984	0.200771
	165	0.0352575	0.200955	0.0664233	0.247825	0.152572	0.150333	-0.0998537	0.523191	0.0769782	0.526039	0.329149	0.243884	0.00639606	0.164314	0.135206	0.168765	0.135663	0.116992	0.0985651	0.831446	0.0487576	0.282153	0.340578	0.229655
	168	0.035809	0.212665	0.0507778	0.22547	0.113359	0.159423	-0.0824275	0.531417	0.0546002	0.460537	0.262836	0.257014	0.00521449	0.16844	0.120109	0.152601	0.132385	0.118054	0.0973649	0.809071	0.0293954	0.282222	0.332263	0.196874
	171	0.0386199	0.210596	0.101494	0.212946	0.165312	0.182695	-0.0370882	0.531254	0.119553	0.53977	0.238144	0.251848	0.00774277	0.173212	0.144816	0.150271	0.113089	0.114854	0.088926	0.833847	0.0127761	0.263089	0.345674	0.195456
	174	0.0313433	0.213422	0.0899301	0.210596	0.144122	0.13666	-0.067898	0.568167	0.118736	0.481425	0.236752	0.261048	0.00519463	0.16091	0.143924	0.150528	0.114317	0.101579	0.080121	0.794619	0.00470732	0.215917	0.326401	0.191905
	177	0.0364081	0.204823	0.100169	0.19369	0.147551	0.132603	-0.0703364	0.510383	0.158653	0.486087	0.172089	0.316325	0.00319738	0.161627	0.132517	0.155935	0.108604	0.102059	0.055993	0.779293	0.044218	0.253199	0.312558	0.18046
	180	0.0340509	0.221935	0.0814472	0.175771	0.151745	0.169891	-0.0653566	0.509492	0.0942492	0.474978	0.155356	0.339107	0.00288537	0.164389	0.128388	0.145951	0.0852861	0.100283	0.0795148	0.758454	0.0368817	0.263818	0.28746	0.200041

## Sheet: Figure3J
Figure 3J
	Mean Lag versus Mean Decay constant
		Mean Decay Time		Lag
		Mean	error	Mean	error
	WT	0.03827	0.004397	10.06	0.9092
	4KE-IBAR	0.04202	0.01241	7.77	1.931
	ΔIBAR	0.01497	0.005008	28.84	2.961
	I268N-CRIB	0.04212	0.008772	16.99	2.995
	I403P-SH3	0.02599	0.006901	21.3	3.733
	IBAR	0.01071	0.002043	20.71	3.158
	W413G-SH3	0.02025	0.004581	23.07	3.182
