# Supplementary material for: A mechanosensing mechanism controls plasma membrane shape homeostasis at the nanoscale
Source: eLife. 2023 Sep 25;12:e72316. doi: 10.7554/eLife.72316 (PMC10569792; doi:10.7554/eLife.72316)
Supplement: Figure 4—figure supplement 1—source data 1. [file elife-72316-fig4-figsupp1-data1.xlsx]

## Sheet: FigureS4A
Figure S4A
	Number of filipodia per cell
	DMSO	Wisk 10uM
	56	19
	24	20
	25	30
	31	22
	17	0
	30	12
	38	21
	29	26
	17	1
	26	8
	45	5
	33	19
	12	15
	63	8
		23
		11
		36
		4

## Sheet: FigureS4C
Figure S4C
	Number of filipodia per cell
	DMSO	SMIFH2 15uM
	67	25
	93	35
	23	0
	78	41
	51	50
	46	51
	45	117
	69	46
	12	40
	101	16
	54	29
	56	3
		43
		17
		13
		40
		17
		22
		49
		1
		0
		36
		17
