# Supplementary material for: A mechanosensing mechanism controls plasma membrane shape homeostasis at the nanoscale
Source: eLife. 2023 Sep 25;12:e72316. doi: 10.7554/eLife.72316 (PMC10569792; doi:10.7554/eLife.72316)
Supplement: Figure 4—source data 1. [file elife-72316-fig4-data1.xlsx]

## Sheet: Figure4E
Figure 4E
	Fluorescence versus time
	Time (s)	Control DMSO																				Wiskostatin 10uM
	0	1.39761	1.01341	1.11059	0.877269	0.924394	0.906315	1.17589	0.532929	1.17249	1.03627	1.11165	0.896977	0.726153	1.11805							0.709784	1.1856	0.793357	0.677554	0.602889	0.822356	1.63053	1.39519	1.6637	0.986869	0.855256	0.489319	1.78891	0.827016	0.924464	0.776416	0.485496	1.20314
	3	1.07135	0.925891	0.974596	0.707859	0.77703	0.75875	1.1023	0.476593	0.836258	0.801497	0.786385	0.774707	0.591456	1.08442							0.843999	0.674884	0.660786	0.668649	0.484862	0.715839	1.54563	1.33872	1.69016	1.03781	0.806348	0.165573	1.58961	0.834978	0.794171	0.676897	0.501745	1.14229
	6	0.900104	0.840682	0.831749	0.601013	0.724831	0.614376	0.827768	0.467362	0.816883	0.633631	0.790038	0.544206	0.605086	0.977551							0.816471	1.92001	0.653538	0.588013	0.402922	0.579188	1.61881	1.29055	1.6135	1.05014	0.72002	1.22007	1.05753	0.852692	0.806754	0.630539	0.429158	0.832273
	9	0.775858	0.753588	0.654692	0.729893	0.545624	0.680598	0.833796	0.425697	0.763828	0.491491	0.760934	0.577861	0.636817	0.945967							0.785718	1.60927	0.61031	0.540515	0.385256	0.520761	1.62574	1.06037	1.03457	0.693556	0.38247	1.07528	1.04595	0.79385	0.745576	0.620481	0.468315	1.01151
	12	0.811746	0.669093	0.650862	0.695848	0.526542	0.640145	0.784314	0.426805	0.799434	0.474993	0.713055	0.579941	0.59225	0.961782							0.711339	1.51216	0.545407	0.429703	0.28078	0.472883	1.66591	1.15679	1.10123	0.701324	0.591565	1.1404	0.913778	0.646552	0.693958	0.600674	0.477678	1.00073
	15	0.753015	0.518564	0.653467	0.527691	0.50645	0.593133	0.745407	0.391658	0.734373	0.375255	0.627866	0.588449	0.512047	0.903758							0.67459	1.32883	0.456695	0.306842	0.267455	0.450473	1.64767	1.0667	1.00695	0.731224	0.491697	0.970521	0.850882	0.603181	0.618629	0.534579	0.453688	0.950862
	18	0.707021	0.524361	0.649083	0.486051	0.507167	0.555043	0.51805	0.405781	0.701674	0.334708	0.632306	0.517316	0.539962	0.882949							0.656474	1.30866	0.362906	0.238353	0.244123	0.387921	1.70344	1.05653	0.876705	0.745357	0.453009	0.818323	0.864192	0.623393	0.586192	0.528313	0.488127	0.900547
	21	0.610069	0.566362	0.57311	0.522257	0.494456	0.55887	0.493084	0.33306	0.674456	0.279461	0.613289	0.534015	0.529246	0.901062							0.60406	1.11105	0.368893	0.16856	0.237706	0.324678	1.70679	1.06046	0.826147	0.719189	0.467934	0.756767	0.936023	0.662171	0.697596	0.472129	0.47501	0.905439
	24	0.55113	0.478439	0.571511	0.53395	0.492602	0.499223	0.497309	0.312094	0.570788	0.275064	0.632099	0.487085	0.542388	0.875078							0.572023	0.984008	0.350607	0.110593	0.195824	0.310908	1.19214	0.987548	0.738248	0.675137	0.367931	0.790714	0.871424	0.55263	0.538778	0.488794	0.427003	0.917529
	27	0.476225	0.499145	0.545047	0.505537	0.460372	0.513133	0.41931	0.30921	0.555752	0.248485	0.603205	0.483678	0.542873	0.841914							0.5084	0.896763	0.305059	0.0485981	0.184208	0.3248	1.16252	0.90775	0.577427	0.65209	0.384791	0.606385	0.794255	0.580735	0.470254	0.485697	0.444674	0.833881
	30	0.434091	0.394088	0.579835	0.451076	0.444671	0.457748	0.35664	0.284709	0.510168	0.257044	0.586141	0.447735	0.49582	0.865476							0.48096	0.815457	0.278854	0.0392696	0.114748	0.245146	1.17711	0.926793	0.479618	0.675004	0.356044	0.548247	0.859372	0.549642	0.429447	0.448764	0.428485	0.811753
	33	0.39735	0.403104	0.564196	0.44642	0.419857	0.427198	0.279315	0.247648	0.444499	0.159046	0.578874	0.353235	0.494687	0.794905							0.532646	0.800846	0.237328	0.0210415	0.107067	0.214014	1.1846	0.911365	0.426363	0.58616	0.325861	0.679687	0.479016	0.44018	0.429118	0.481125	0.423907	0.821337
	36	0.372104	0.376088	0.537511	0.425939	0.406653	0.383218	0.163444	0.252536	0.321299	0.0951637	0.514729	0.367611	0.505653	0.797509							0.409424	0.730926	0.231508	-0.00556561	0.0125174	0.214132	1.24462	0.74724	0.329125	0.583356	0.309536	0.613527	0.700807	0.446473	0.296621	0.39839	0.461549	0.687059
	39	0.308608	0.346209	0.457087	0.429767	0.396123	0.377734	0.220719	0.278367	0.288727	0.0299237	0.544253	0.358913	0.506833	0.780786							0.320388	0.599273	0.209848	0.00528617	0.019661	0.218121	1.26146	0.685012	0.357467	0.587343	0.257961	0.604335	0.667048	0.4345	0.259614	0.447295	0.429551	0.725974
	42	0.299104	0.30616	0.412514	0.410174	0.349071	0.391561	0.189704	0.229784	0.281597	0.0595882	0.472029	0.365887	0.443952	0.786837							0.318415	0.548076	0.172297	-0.0122911	-0.00506752	0.188191	1.30269	0.739378	0.364009	0.613871	0.244973	0.600417	0.663999	0.42409	0.0899153	0.370814	0.458806	0.717159
	45	0.321618	0.328283	0.414705	0.365862	0.356388	0.297713	0.159721	0.236874	0.209768	0.0313647	0.501844	0.305236	0.420933	0.721434							0.340641	0.485797	0.126818	-0.0362131	-0.0269344	0.12461	1.29103	0.675823	0.315498	0.594075	0.257701	0.535719	0.516894	0.424586	0.292631	0.383161	0.4438	0.709069
	48	0.313158	0.273496	0.365435	0.348105	0.346598	0.310567	0.109227	0.124115	0.207266	-0.0315976	0.236909	0.322447	0.421553	0.753759							0.333706	0.371397	0.122034	-0.005082	-0.0432099	0.145582	1.30714	0.688327	0.324455	0.609697	0.242879	0.594704	0.474776	0.32376	0.327994	0.378125	0.477995	0.67018
	51	0.32095	0.291334	0.386745	0.296468	0.328175	0.266208	0.149517	0.100518	0.121871	-0.0569554	0.442007	0.319825	0.416478	0.774757							0.270124	0.382951	0.112374	-0.042416	-0.0696785	0.129395	1.25302	0.640861	0.196462	0.63337	0.226335	0.491036	0.417341	0.315345	0.314029	0.422557	0.471281	0.653709
	54	0.304398	0.293931	0.356155	0.231708	0.31194	0.266363	0.186328	0.105224	0.117472	-0.0170202	0.453174	0.324411	0.382913	0.728272							0.220456	0.337681	0.095438	-0.0676166	-0.0450985	0.132708	1.01922	0.541528	0.191636	0.498654	0.200061	0.397652	0.391966	0.374948	0.273409	0.349946	0.366274	0.723028
	57	0.337609	0.247742	0.354695	0.200963	0.297569	0.222573	0.160078	0.0888801	0.0828333	-0.0416552	0.39758	0.234317	0.393195	0.704656							0.229746	0.262132	0.0670964	-0.062472	-0.0807896	0.159566	0.946039	0.588788	0.212983	0.522899	0.124188	0.460644	0.206518	0.343844	0.279415	0.362483	0.405016	0.603339
	60	0.305188	0.270579	0.337814	0.187938	0.282334	0.220471	0.100016	0.107908	0.0471535	-0.0254666	0.447721	0.229164	0.351883	0.687638							0.202849	0.193407	0.0668324	-0.0609031	-0.088617	0.132924	0.954212	0.413624	0.151314	0.520037	0.21956	0.399335	0.0603829	0.327328	0.323302	0.36922	0.408535	0.6341
	63	0.320437	0.244781	0.342576	0.182434	0.302503	0.211787	0.0368638	0.0501439	0.0142499	-0.03812	0.375892	0.220769	0.309632	0.659549							0.145524	0.256081	0.0785866	-0.0562951	-0.0600363	0.0872185	0.987911	0.404025	0.159979	0.470773	0.252898	0.378369	0.235374	0.315014	0.205235	0.319855	0.397446	0.653474
	66	0.305941	0.218049	0.36254	0.166181	0.277856	0.222074	0.0208692	0.0648221	0.00937718	-0.12355	0.334974	0.249698	0.263282	0.63405							0.181073	0.199728	0.064084	-0.0559043	-0.0735542	0.0599899	0.945845	0.469982	0.15856	0.474401	0.130715	0.386101	0.340476	0.17578	0.215061	0.356532	0.379727	0.571279
	69	0.279399	0.246036	0.377458	0.140364	0.271078	0.210821	0.00478979	0.0806048	-0.0171109	-0.0820761	0.320812	0.218912	0.238155	0.579149							0.161931	0.137081	0.0721314	-0.0665023	-0.0857685	0.0584417	0.967792	0.39736	0.115439	0.490066	0.194258	0.316838	0.136395	0.239758	0.156217	0.431173	0.40877	0.610367
	72	0.240506	0.256814	0.304723	0.127599	0.257668	0.207192	-0.0201351	0.0536093	-0.0769099	-0.0837798	0.316246	0.241715	0.205924	0.563066							0.179425	0.160263	0.0567555	-0.0544154	-0.0801752	0.0905661	0.960404	0.398012	0.137079	0.471973	0.150845	0.343693	0.199444	0.164622	0.227148	0.311004	0.366281	0.621885
	75	0.248151	0.224234	0.302442	0.0794809	0.242964	0.214821	-0.00758434	0.0514578	-0.0745887	-0.0837237	0.334242	0.204739	0.195335	0.558708							0.159768	0.141356	0.0397364	-0.0637196	-0.0847855	0.084337	0.878076	0.326197	0.195436	0.364344	0.124473	0.287329	-0.0189587	0.146229	0.174708	0.401223	0.375446	0.624565
	78	0.291832	0.232204	0.326484	0.0589016	0.251898	0.20636	0.00638295	0.0178893	-0.147267	-0.0891812	0.330825	0.16204	0.171855	0.577168							0.186498	0.128024	0.0402196	-0.049826	-0.0710051	0.0514818	0.849057	0.335556	0.180043	0.431362	0.183586	0.309103	0.19947	0.122084	0.11707	0.312163	0.367738	0.681448
	81	0.280244	0.17342	0.320182	0.0421733	0.231963	0.219162	-0.0244107	0.0337491	-0.144712	-0.0018253	0.286118	0.20167	0.136076	0.521446							0.174675	0.152287	0.0324112	-0.0757632	-0.065213	0.0742323	0.883524	0.27546	0.17964	0.442507	0.139956	0.347147	0.277567	0.154829	0.179129	0.321147	0.339005	0.596965
	84	0.246575	0.174696	0.290371	0.0206461	0.209028	0.222186	-0.0893238	-0.00380416	-0.163262	-0.0485351	0.314919	0.251139	0.0995734	0.520007							0.137245	0.14239	0.0365414	-0.0419693	-0.0598833	0.0254729	0.901012	0.262353	0.177844	0.398176	0.185036	0.331465	0.18165	0.119832	0.167063	0.303188	0.319169	0.615134
	87	0.271849	0.214052	0.315052	-0.0134436	0.208831	0.163832	-0.138658	0.0119975	-0.143129	-0.00066049	0.330748	0.213416	0.0706022	0.529382							0.107212	0.150514	0.0352854	-0.0565017	-0.120096	0.0829338	0.905509	0.33209	0.21422	0.411735	0.141271	0.352963	0.0468614	0.0734214	0.176982	0.268255	0.280237	0.557981
	90	0.281295	0.187641	0.290904	-0.0140537	0.196582	0.228788	-0.132892	0.01185	-0.171624	0.0536083	0.321619	0.16756	0.0583376	0.503757							0.142239	0.16011	0.0188443	-0.0538829	-0.0727683	0.0870431	0.883164	0.247904	0.197325	0.420585	0.142631	0.300542	0.319139	0.0700591	0.102817	0.246681	0.2946	0.598157
	93	0.255213	0.14981	0.318977	-0.0364503	0.204977	0.176612	-0.129877	-0.00848902	-0.187044	0.0444133	0.318208	0.250036	0.0881435	0.494929							0.0967209	0.141288	0.0260232	-0.0551861	-0.0877917	0.0668644	0.671397	0.247462	0.159397	0.392701	0.083227	0.302728	0.179201	0.0194972	0.0695871	0.308788	0.305561	0.560651
	96	0.224014	0.155444	0.336828	-0.0364696	0.205022	0.155012	-0.140708	-0.000149697	-0.156994	0.0796517	0.296014	0.25873	0.0746303	0.469497							0.0755111	0.0980609	0.0319396	-0.0384591	-0.0827091	0.0141464	0.665878	0.203206	0.15468	0.395271	0.126427	0.342213	-0.0293236	0.020707	0.0785139	0.250691	0.31593	0.523779
	99	0.215477	0.165084	0.261788	-0.0335954	0.204887	0.155566	-0.152476	-0.0192835	-0.16548	0.110335	0.278527	0.226374	0.0420855	0.476451							0.0942463	0.025261	0.0122791	-0.0413983	-0.10447	0.0352375	0.765557	0.165243	0.160109	0.373252	0.177981	0.228808	0.141373	0.0377892	0.0511825	0.246827	0.300907	0.444313
	102	0.240248	0.122422	0.263466	-0.0773117	0.2161	0.20121	-0.215214	0.00894986	-0.143572	0.053594	0.301899	0.183764	0.0352978	0.485563							0.0847753	0.053789	0.0290308	-0.0521442	-0.0912576	-0.00570692	0.667935	0.124795	0.153421	0.358099	0.177388	0.322958	0.227284	-0.00397457	0.192186	0.250072	0.278272	0.529772
	105	0.221707	0.185234	0.264745	-0.0729964	0.18392	0.158493	-0.136305	-0.0338232	-0.146309	0.0169411	0.222002	0.142034	0.00644793	0.446433							0.110541	0.0152151	0.0337017	-0.0146772	-0.0843155	0.0175252	0.686001	0.168728	0.121304	0.366861	0.166036	0.271797	0.301464	-0.0547724	0.166143	0.258502	0.308564	0.589807
	108	0.2288	0.183683	0.269809	-0.0796254	0.187956	0.123194	-0.167994	-0.0437665	-0.140544	0.0540018	0.217421	0.17873	0.0141306	0.407164							0.0938098	0.0485207	0.0326158	-0.0495103	-0.110049	0.0020277	0.637465	0.158782	0.167235	0.347557	0.154367	0.358486	0.162166	-0.0704895	0.122149	0.286422	0.30934	0.468159
	111	0.260432	0.220341	0.294006	-0.101673	0.179252	0.133493	-0.10671	-0.0513611	-0.147784	0.131538	0.207074	0.177082	0.00292458	0.426659							0.0916629	0.0383811	0.0314394	-0.0424774	-0.1095	0.016047	0.611851	0.116231	0.16893	0.377242	0.0996621	0.16163	-0.159673	-0.0728332	0.0529587	0.299799	0.284323	0.412279
	114	0.27498	0.15305	0.244133	-0.0743123	0.176914	0.153685	-0.185353	-0.0620425	-0.124271	0.13003	0.252209	0.147908	-0.0204948	0.454649							0.0802949	0.0058039	0.0313579	-0.0814222	-0.112659	0.00218949	0.60321	0.101501	0.145153	0.322351	0.197282	0.221249	0.0412727	-0.00521017	0.151176	0.269642	0.252183	0.504235
	117	0.287248	0.107905	0.278666	-0.08883	0.176678	0.100102	-0.161682	-0.0472454	-0.109258	0.0968688	0.235979	0.157432	-0.0471754	0.436841							0.0383703	-0.045889	0.03534	-0.044131	-0.111881	0.0300827	0.690906	0.080458	0.0797843	0.352301	0.136613	0.165699	0.0410077	-0.0241291	0.168985	0.242231	0.285543	0.477203
	120	0.279337	0.18806	0.256907	-0.0870303	0.176613	0.115692	-0.203693	-0.0883658	-0.138606	0.122652	0.215522	0.210481	-0.0561479	0.337842							0.0108365	-0.0487966	0.0739953	-0.0445586	-0.0638828	-0.0209899	0.702692	0.0799661	0.0774352	0.312364	0.0361909	0.185883	0.0313219	-0.0268923	0.067454	0.245855	0.275761	0.458756
	123	0.262321	0.124175	0.275447	-0.0779958	0.163168	0.126434	-0.145521	-0.105963	-0.0986182	0.0686238	0.210715	0.203895	-0.0537147	0.380442							0.0227658	-0.00794596	0.0485255	-0.027663	-0.145072	0.0104098	0.69292	-0.00453892	0.147199	0.331188	0.0936919	0.117776	-0.114694	-0.045356	0.180124	0.208895	0.270123	0.489629
	126	0.285844	0.0781254	0.261422	-0.0860602	0.163185	0.15667	-0.1236	-0.0910791	-0.124699	0.0938178	0.174371	0.212332	-0.0834583	0.388788							-0.00123249	0.00159333	0.0771917	-0.0151464	-0.0976618	-0.00276522	0.697555	-0.0106447	0.10516	0.306998	0.120192	0.148374	-0.124996	-0.0804266	0.043971	0.21897	0.234066	0.388982
	129	0.317132	0.120519	0.252209	-0.101495	0.17526	0.130465	-0.153559	-0.0903651	-0.118207	0.0934404	0.17107	0.213839	-0.121346	0.405051							0.000570836	0.0368173	0.0688932	-0.0320258	-0.116834	0.0135376	0.608029	0.00623857	0.199377	0.3185	0.0331784	0.220216	-0.169374	-0.0692207	-0.0296986	0.220477	0.238141	0.438915
	132	0.27157	0.150761	0.244538	-0.100832	0.183501	0.132163	-0.0958623	-0.100656	-0.0921211	0.0934765	0.220784	0.171624	-0.135008	0.3408							0.0145541	0.0730386	0.0553987	-0.0424491	-0.118476	0.0227788	0.624749	-0.0271089	0.109187	0.253901	0.0647815	0.116223	0.135489	-0.0794187	0.132766	0.273536	0.229943	0.376228
	135	0.297302	0.11539	0.239668	-0.0817513	0.17895	0.133415	-0.123191	-0.0731271	-0.0968629	0.0850765	0.211052	0.188687	-0.146421	0.385351							0.0332414	0.0348485	0.0495791	-0.0511204	-0.131535	0.0405309	0.59712	-0.0254268	0.147172	0.261251	0.00607943	0.15186	0.00928477	-0.0283546	0.0353935	0.22551	0.209007	0.403244
	138	0.258151	0.106111	0.276454	-0.103759	0.18472	0.142687	-0.17918	-0.0816203	-0.0981804	0.115574	0.180913	0.174755	-0.125726	0.381189							0.00560405	0.0671829	0.0465148	-0.0545854	-0.123705	0.0269169	0.534168	-0.00987924	0.0609588	0.205293	0.0922089	0.193863	-0.0146121	-0.0449265	0.138563	0.182548	0.212193	0.342296
	141	0.303843	0.112244	0.263727	-0.103393	0.179918	0.156538	-0.193907	-0.111444	-0.069835	0.101433	0.178934	0.229056	-0.150299	0.36435							-0.0186383	0.146912	0.072442	-0.0359613	-0.116655	0.0217499	0.544741	-0.0510427	0.0636318	0.162786	0.0239391	0.150704	-0.0444044	-0.0428387	0.177623	0.180059	0.204971	0.360424
	144	0.313938	0.086346	0.221123	-0.0811525	0.153385	0.14975	-0.100874	-0.118518	-0.111914	0.0623424	0.172823	0.175466	-0.157257	0.321565							-0.0246813	0.171004	0.0704742	-0.0599311	-0.137517	0.0287087	0.577943	-0.0758176	0.0617778	0.196547	0.0599433	0.189598	-0.0865701	-0.0154886	0.0757096	0.164065	0.18144	0.36987
	147	0.32959	0.108865	0.231049	-0.0814459	0.150531	0.0972252	-0.109097	-0.109797	-0.0742289	0.00911979	0.154293	0.113523	-0.162692	0.360473							-0.00890096	0.133711	0.0567679	-0.0350716	-0.147928	0.00971091	0.585956	-0.0880194	0.0523365	0.190343	0.117602	0.129606	0.0253333	-0.0243874	0.100535	0.223846	0.20884	0.434632
	150	0.2611	0.12119	0.229684	-0.0743153	0.157044	0.14211	-0.164638	-0.126988	-0.0940668	-0.142765	0.154864	0.108431	-0.190012	0.347175							-0.0272465	0.208337	0.0805061	-0.0253296	-0.169664	-0.00752976	0.578389	-0.10298	0.108244	0.174079	0.0502618	0.161523	-0.080971	-0.0142999	0.109278	0.193697	0.194129	0.422923
	153	0.283212	0.123919	0.211117	-0.0501324	0.162964	0.133116	-0.127134	-0.121753	-0.0853522	-0.0622002	0.116424	0.0962579	-0.21373	0.358335							-0.0237834	0.170873	0.0903212	-0.0230455	-0.124826	0.0251061	0.521343	-0.110115	0.0447948	0.161515	0.0184294	0.116175	0.0203116	-0.0339704	0.0814804	0.157556	0.163301	0.351683
	156	0.237554	0.148654	0.213626	-0.078871	0.162682	0.12901	-0.108248	-0.124873	-0.0662963	-0.141663	0.142857	0.120076	-0.195882	0.310975							-0.000960026	0.143002	0.0639495	-0.0295949	-0.139316	-0.030018	0.509637	-0.0782862	0.00394068	0.144211	0.00674426	0.108616	0.167816	-0.0806396	0.110847	0.151952	0.18769	0.346208
	159	0.205758	0.173347	0.226225	-0.0621484	0.158322	0.146267	-0.0729606	-0.134026	-0.0536872	-0.0853716	0.141825	0.0731161	-0.21221	0.32353							0.0153332	0.176785	0.0819924	-0.0116433	-0.202852	0.0517487	0.48333	-0.0965456	0.0545723	0.157072	0.118655	0.219413	0.0366228	-0.0279199	0.0248894	0.163282	0.185369	0.336616
	162	0.21728	0.105949	0.199306	-0.0926667	0.14954	0.140233	-0.179187	-0.102488	-0.0396332	-0.097722	0.159578	0.0720726	-0.179042	0.296053							0.0109594	0.109	0.0742508	-0.0267454	-0.181273	-0.0121784	0.509807	-0.0528697	0.0716566	0.141354	0.0659088	0.156975	0.17543	-0.0923284	0.0866586	0.123976	0.180599	0.315301
	165	0.175985	0.17701	0.206988	-0.0619925	0.176499	0.137634	-0.0562372	-0.132244	-0.057155	-0.0930469	0.120977	0.109698	-0.22266	0.295418							-0.0110678	0.0631248	0.0834219	-0.015889	-0.163422	-0.0120329	0.457515	-0.0596517	0.0326202	0.149759	0.0273261	0.183885	-0.0622071	-0.0433048	0.0327363	0.0376103	0.170749	0.348967
	168	0.216221	0.109822	0.175248	-0.0947062	0.164352	0.189702	-0.149045	-0.0950536	-0.0194095	-0.0843711	0.14986	0.129728	-0.196447	0.270013							0.00751334	0.0768032	0.107946	-0.0207459	-0.161826	0.0158539	0.429274	-0.171116	0.0380565	0.13988	0.0985321	-0.00263613	-0.219431	0.0133593	0.0361339	0.0628109	0.182328	0.261564
	171	0.216292	0.131316	0.159842	-0.0665791	0.162472	0.18608	-0.132971	-0.151148	-0.00432762	-0.0854839	0.17325	0.0967001	-0.217197	0.307774							0.0294386	0.142396	0.101952	-0.0466166	-0.17088	-0.00616831	0.480178	-0.122855	-0.0221208	0.154725	0.0441062	0.146284	-0.0329184	0.0336694	0.138004	0.0809116	0.183216	0.343036
	174	0.214818	0.0954928	0.196245	-0.0703915	0.129063	0.189837	-0.130347	-0.139534	-0.0313892	-0.10545	0.210296	0.0913335	-0.227065	0.340283							0.0577326	0.126434	0.0638378	-0.0250276	-0.163724	-0.0163336	0.437203	-0.149107	-0.115723	0.138079	0.0910766	0.172736	-0.0656423	-0.0522151	0.00801946	0.0666429	0.175644	0.368196
	177	0.202747	0.131163	0.150555	-0.0827319	0.132563	0.204072	-0.12491	-0.126871	-0.0370091	-0.0672542	0.217509	0.0970924	-0.218004	0.281056							0.0659911	0.125537	0.0709283	-0.0254649	-0.182463	-0.0232058	0.453802	-0.153814	-0.00992729	0.123354	0.034136	0.0655758	-0.096298	-0.0557298	0.0526613	0.10939	0.190303	0.350249
	180	0.222642	0.0940136	0.128068	-0.106	0.115821	0.154762	-0.13251	-0.0983292	-0.0282256	-0.165764	0.162403	0.117883	-0.221717	0.281841							0.0561658	0.157309	0.0729787	-0.0514804	-0.16743	0.000251943	0.483339	-0.203176	-0.0141648	0.15131	-0.00296194	0.0644905	-0.0425095	-0.0680354	0.023916	0.014716	0.144403	0.214759

## Sheet: Figure4F
Figure 4F
	Decay constant (s-1)
	DMSO	Wisk
	0.0571515	0.0205022
	0.0316172	0.0102408
	0.0189799	0.0309501
	0.0342965	0.0260445
	0.015102	0.0112353
	0.0262168	0.00994149
	0.0292545	0.0441454
	0.0299999	0.0440646
	0.00439835	0.0248886
	0.0171371	0.0627728
	0.0633573	0.00838873
	0.00942116	0.0162145
	0.0274652	0.0355305
	0.0294737	0.028151
		0.0362103
		0.00833972
		7.49335e-05
		0.0103895

## Sheet: Figure4G
Figure 4G
	Fluorescence versus time
	Time (s)	CTRL DMSO 1h																								SMIFH2 15uM
	0	0.869322	0.919742	-0.0167142	0.386769	1.05385	1.27183	1.51256	1.05158	0.991447	1.51072	1.51489	0.934005													1.04957	1.558	0.624986	1.88601	1.41812	0.71566	0.780824	1.05467	1.20254	1.3083	0.486216	1.50238	0.369376	0.66008	0.800313	1.03566	0.258408	0.972977	1.92743	1.46158	0.747779	0.620816	1.18286	0.936562
	3	0.901325	0.892342	0.583437	0.423021	1.16036	1.35983	0.979884	0.970727	0.798225	1.43473	1.32277	0.739251													0.766145	1.27813	0.547909	1.77791	1.30515	0.564934	0.764523	1.0534	0.891126	1.00182	0.368052	1.26911	0.372722	0.441706	0.207471	0.810546	0.314469	0.843325	1.78805	1.53787	0.692152	0.531415	1.40398	0.807366
	6	0.496617	0.708783	0.596406	0.426041	1.15963	0.8062	0.981094	0.910843	0.644582	1.39151	1.34942	0.66332													0.619208	1.17309	0.374147	1.84944	1.18266	0.516885	0.562364	1.05211	0.904842	0.936575	0.408867	1.03973	0.255539	0.285926	0.0199483	0.683584	0.311714	0.797654	1.4723	1.17607	0.605891	0.304743	0.873175	0.642994
	9	0.522689	0.710215	0.624833	0.386213	1.05182	1.0252	0.929418	0.775216	0.664485	1.31958	1.18583	0.604281													0.413155	1.02119	0.248768	1.47253	0.885941	0.38741	0.489168	0.840837	0.82858	0.891097	0.415	0.993997	0.26601	0.26858	-0.0468579	0.660177	0.304184	0.564141	1.49492	1.1613	0.490103	0.218972	1.03024	0.550789
	12	0.510619	0.649192	0.579078	0.334483	0.958509	1.06379	0.822906	0.664934	0.619949	1.24222	0.870095	0.542628													0.178208	0.987949	0.0935631	1.54662	0.893905	0.3786	0.440848	0.854122	0.556729	0.88034	0.392667	0.922857	0.182131	0.137205	-0.0817195	0.607577	0.29238	0.669991	1.5188	1.12719	0.38255	0.168876	0.982348	0.465401
	15	0.527347	0.608417	0.563347	0.353592	1.01654	1.04401	0.678438	0.633264	0.676915	1.11756	0.967553	0.50893													0.110198	0.906909	0.0384561	1.22013	0.80276	0.366764	0.441758	0.85102	0.591011	0.729852	0.32023	0.917303	0.231512	0.16104	-0.135459	0.5145	0.273907	0.696291	1.60158	1.04378	0.279523	0.100014	1.00877	0.470638
	18	0.469218	0.551919	0.552397	0.336568	1.02066	1.05339	0.660088	0.608763	0.729094	0.961462	0.957283	0.515986													0.0587995	0.772518	-0.00358046	1.20741	0.697121	0.352907	0.306525	0.843166	0.508194	0.638465	0.329998	0.770904	0.242413	0.128635	-0.0838656	0.5209	0.276641	0.630415	1.57722	1.01082	0.185415	0.0961309	0.977273	0.399305
	21	0.494119	0.5207	0.399801	0.255584	0.825667	0.974236	0.65714	0.539666	0.773597	0.871452	0.921198	0.448869													0.0786677	0.666669	-0.00799816	1.00765	0.666437	0.287285	0.348483	0.799204	0.504761	0.649915	0.31634	0.760148	0.242497	0.107412	-0.119206	0.487464	0.259847	0.587385	1.62643	0.978599	0.145451	0.102676	0.974856	0.377361
	24	0.316046	0.477225	0.386012	0.247575	0.808114	0.985692	0.643964	0.515465	0.829948	0.789526	0.905835	0.479931													0.0378078	0.641859	-0.00854783	0.976387	0.626199	0.288024	0.352441	0.649909	0.504859	0.663609	0.33204	0.710154	0.233145	0.099106	-0.132153	0.498191	0.294152	0.444428	1.65895	0.914898	0.107658	0.10878	0.797582	0.313913
	27	0.341742	0.445114	0.368921	0.236036	0.776958	0.959042	0.625853	0.46452	0.80337	0.699604	0.86763	0.479418													0.0479328	0.641927	-0.049986	0.992969	0.639245	0.261242	0.329846	0.626538	0.484889	0.637519	0.2984	0.509764	0.231212	0.07293	-0.114728	0.430228	0.281746	0.440322	1.64413	0.91881	0.0731784	0.0912982	0.687705	0.273268
	30	0.290781	0.435846	0.334961	0.217568	0.753791	0.913271	0.529349	0.373484	0.733991	0.663983	0.749568	0.437946													0.0104218	0.582545	-0.0683629	0.877117	0.550502	0.219578	0.315605	0.651754	0.335625	0.546947	0.298109	0.503396	0.238474	0.108873	-0.104245	0.440361	0.244995	0.423341	1.67651	0.95011	0.0516788	0.104127	0.758268	0.285715
	33	0.276901	0.429583	0.34728	0.175203	0.789992	0.864957	0.508142	0.4879	0.75013	0.603179	0.752339	0.410969													0.0201242	0.614644	-0.0715042	1.14528	0.71127	0.235707	0.221666	0.589633	0.30476	0.502542	0.343304	0.48433	0.207107	0.0746932	-0.089963	0.404612	0.249598	0.381432	1.71066	0.963878	0.0289528	0.0995965	0.680781	0.263943
	36	0.216471	0.3968	0.346191	0.164922	0.720614	0.753666	0.494204	0.412994	0.761062	0.541344	0.74169	0.383683													-0.00179673	0.585165	-0.0899357	1.16813	0.76701	0.195427	0.18603	0.612974	0.305805	0.479445	0.294734	0.473426	0.209733	0.0797981	-0.0747449	0.395309	0.248025	0.369785	1.57219	0.853069	0.0344665	0.0994204	0.675599	0.274425
	39	0.189821	0.384065	0.294806	0.161661	0.684459	0.517331	0.495508	0.34693	0.620736	0.479412	0.699045	0.388309													-0.0128049	0.642774	-0.0760631	1.25754	0.710762	0.150597	0.220692	0.590358	0.233993	0.478464	0.349211	0.520794	0.216409	0.0646953	-0.133645	0.373698	0.242839	0.337521	1.62687	0.83864	0.0588902	0.0876751	0.712707	0.277569
	42	0.122487	0.364692	0.250134	0.137062	0.659293	0.530485	0.427274	0.387036	0.67125	0.447974	0.714017	0.356368													0.00199019	0.613834	-0.0804138	1.29633	0.709328	0.170876	0.178218	0.57725	0.232438	0.385306	0.366597	0.497181	0.23282	0.0265433	-0.154837	0.347978	0.265591	0.352728	1.64203	0.853813	0.0280903	0.0882057	0.7024	0.256621
	45	0.152567	0.358403	0.221418	0.151559	0.643102	0.465886	0.395955	0.336328	0.691748	0.415214	0.72045	0.317137													-0.0180237	0.615924	-0.0901698	1.27999	0.783134	0.199444	0.181617	0.567946	0.246202	0.287992	0.361259	0.480311	0.196144	0.0443027	-0.123184	0.376868	0.258038	0.355869	1.64288	0.89851	0.0393172	0.101258	0.678129	0.265269
	48	0.193788	0.327332	0.236912	0.110153	0.604177	0.43361	0.385589	0.304767	0.609066	0.379967	0.698954	0.322879													-0.0219938	0.631564	-0.0518077	1.31031	0.735636	0.146767	0.136092	0.571503	0.245869	0.303763	0.331554	0.461582	0.168093	0.0201553	-0.13674	0.345598	0.253382	0.346668	1.67649	0.813138	0.0267793	0.0959387	0.635553	0.292479
	51	0.191927	0.296994	0.215898	0.0899823	0.561111	0.454987	0.3889	0.305894	0.545467	0.371743	0.631807	0.343441													-0.00103344	0.586398	-0.0700841	1.09367	0.695242	0.140114	0.0957808	0.549159	0.289023	0.327635	0.322749	0.467204	0.157402	0.0206973	-0.167662	0.294611	0.236922	0.32443	1.67058	0.863909	0.0342349	0.0878521	0.677827	0.235274
	54	0.197246	0.28306	0.187433	0.082082	0.475812	0.429469	0.350782	0.24848	0.538765	0.33922	0.646247	0.314953													0.00714826	0.598787	-0.0765228	1.12612	0.677645	0.165911	0.140777	0.520595	0.257908	0.303752	0.289838	0.431632	0.142267	0.0431223	-0.133539	0.316667	0.226273	0.298396	1.66046	0.755668	0.00944485	0.100843	0.629619	0.24493
	57	0.177638	0.266074	0.153857	0.0796195	0.416113	0.43547	0.321393	0.269671	0.529808	0.307052	0.65515	0.326478													0.0111809	0.571144	-0.0650634	1.08927	0.637978	0.168324	0.108535	0.480843	0.218988	0.316575	0.301197	0.41248	0.119727	0.0111338	-0.166822	0.326747	0.22133	0.32978	1.66245	0.721413	0.0265218	0.0909178	0.56238	0.264122
	60	0.153	0.274145	0.156139	0.0584714	0.400992	0.321495	0.283221	0.251939	0.418283	0.288299	0.630044	0.304643													0.0087243	0.537867	-0.0826444	1.00906	0.700256	0.0840395	0.109455	0.472609	0.169471	0.163824	0.295337	0.41577	0.108559	0.0389539	-0.159933	0.296357	0.231825	0.284189	1.67285	0.76417	0.0274691	0.0972387	0.632449	0.26395
	63	0.132967	0.225264	0.118674	0.0737204	0.336936	0.288971	0.320606	0.231851	0.419919	0.28107	0.694576	0.28935													0.0060935	0.516277	-0.0849131	0.965247	0.643555	0.10865	0.0706036	0.462103	0.168197	0.169712	0.201295	0.403526	0.102593	0.0457535	-0.162798	0.267308	0.221472	0.241981	1.68106	0.720127	0.0432432	0.0835576	0.594009	0.262995
	66	0.101986	0.239173	0.12928	0.0675927	0.362785	0.298401	0.385772	0.252564	0.454974	0.254039	0.660204	0.26407													-0.0239929	0.500905	-0.0681576	0.987665	0.651333	0.0900396	0.0368458	0.45806	0.139272	0.178498	0.0682314	0.376201	0.106415	0.0448045	-0.0903809	0.252083	0.226234	0.255303	1.35303	0.752523	0.0362814	0.0825162	0.547982	0.246895
	69	0.0651589	0.253786	0.107311	0.0236904	0.351875	0.290731	0.372309	0.194985	0.455435	0.238607	0.649891	0.207779													0.0077864	0.482192	-0.0665474	0.972606	0.55924	0.103214	0.0366879	0.458881	0.149483	0.183485	0.0806335	0.33289	0.101277	0.00365494	-0.102631	0.262096	0.24426	0.205238	1.3987	0.735064	0.0249277	0.0783729	0.486006	0.214933
	72	0.0962861	0.247702	0.11742	0.0285693	0.339358	0.275466	0.350055	0.163556	0.405557	0.236707	0.52775	0.214824													0.0169656	0.499517	-0.0736669	0.857	0.602204	0.110603	0.0398491	0.435426	0.125598	0.150777	0.101205	0.315178	0.0891512	0.0219355	-0.112833	0.247545	0.228982	0.238054	1.43727	0.755602	0.0300576	0.0900985	0.476218	0.200858
	75	0.0146769	0.20728	0.10953	0.0209555	0.341998	0.265068	0.335455	0.156958	0.351241	0.219084	0.547688	0.264089													0.0475918	0.49241	-0.0711937	0.952439	0.61589	0.111119	0.0115916	0.422598	0.0787672	0.116711	0.119349	0.342483	0.0932247	0.0245557	-0.186403	0.278987	0.194218	0.16696	1.44027	0.724603	0.0389587	0.101484	0.425398	0.184754
	78	0.0113475	0.227049	0.102945	0.0223703	0.325394	0.293058	0.351816	0.123795	0.348765	0.209213	0.551602	0.243938													0.0370587	0.533509	-0.0880198	0.846668	0.482094	0.113736	-0.00227331	0.41452	0.00161936	0.122316	0.00890886	0.316475	0.0920835	0.0176607	-0.121771	0.254661	0.220083	0.189772	1.43048	0.71797	0.0305905	0.0844892	0.433544	0.229888
	81	0.0195126	0.194053	0.0875645	0.0277023	0.309196	0.26386	0.302679	0.12244	0.39755	0.180752	0.508291	0.196104													0.0100419	0.494502	-0.0945945	0.799643	0.507727	0.11463	0.00983148	0.44111	0.0159217	0.0868049	-0.00966056	0.34783	0.0901809	0.0435449	-0.163526	0.220519	0.228467	0.161459	1.43955	0.721248	0.0279872	0.0867908	0.428304	0.207306
	84	-0.0262288	0.209211	0.0575138	0.00721385	0.324397	0.218641	0.321419	0.141336	0.340018	0.184631	0.529296	0.217673													0.0137022	0.501592	-0.07352	0.848086	0.573744	0.106706	-0.0034672	0.438065	0.0102549	0.0903385	0.0297536	0.380145	0.101068	0.0367947	-0.146997	0.256651	0.238705	0.142264	1.44067	0.693382	0.0294439	0.0792116	0.380212	0.187896
	87	-0.0445524	0.212447	0.0864452	0.00336004	0.272049	0.21178	0.275098	0.12245	0.33594	0.166498	0.516393	0.186946													0.0278113	0.496751	-0.0958179	0.745633	0.447788	0.137583	-0.000569819	0.417971	0.105078	0.125684	0.0563994	0.315589	0.0842511	0.0166964	-0.142594	0.214478	0.232999	0.111111	1.42087	0.657253	0.0364331	0.0775972	0.352131	0.213449
	90	-0.0528345	0.208055	0.0371036	0.00914857	0.258486	0.1275	0.285669	0.129388	0.342245	0.173963	0.290881	0.202305													0.0176606	0.503752	-0.086924	0.723139	0.467413	0.0557439	0.0188543	0.417067	0.121817	0.05932	0.00839004	0.331777	0.0913292	0.0144247	-0.142921	0.222077	0.204663	0.128488	1.38979	0.648461	0.0264602	0.090921	0.386169	0.180147
	93	-0.00893982	0.178779	0.0571357	0.0227574	0.279656	0.146631	0.233151	0.114022	0.294077	0.174782	0.476678	0.219563													0.0440657	0.496345	-0.111382	0.689775	0.461979	0.0683685	-0.0189323	0.417881	0.0965727	0.068649	-0.0419465	0.37757	0.0771498	0.0169602	-0.113581	0.22176	0.232103	0.16088	1.42405	0.655968	0.0279038	0.0791271	0.409537	0.196396
	96	-0.0154817	0.170379	0.0808748	0.00273493	0.26186	0.204188	0.2204	0.0902259	0.24944	0.179639	0.465062	0.192999													0.0400911	0.47137	-0.0990715	0.722666	0.511289	0.0766546	-0.051563	0.394993	0.0689053	0.042649	-0.00382722	0.342036	0.0756353	0.0149262	-0.113847	0.208145	0.216362	0.123103	1.40504	0.512597	0.0334491	0.0772346	0.366058	0.200501
	99	-0.0316595	0.183277	0.0419653	0.0201641	0.27844	0.145686	0.267815	0.108574	0.20182	0.188735	0.39875	0.172575													0.0237029	0.453061	-0.093899	0.688925	0.468572	0.0754463	-0.060569	0.399515	0.0692058	0.0703477	0.02063	0.394477	0.0639237	0.0262022	-0.145245	0.225186	0.187039	0.102232	1.4024	0.509681	0.0329779	0.0702611	0.351535	0.146113
	102	0.00622514	0.181313	0.0541682	0.0253572	0.216358	0.15901	0.139063	0.10758	0.209855	0.203557	0.415781	0.192929													0.0350772	0.429179	-0.0730551	0.801937	0.459432	0.0879204	-0.0460717	0.36926	0.0843757	0.0717428	-0.0398306	0.333127	0.0801402	0.00830577	-0.152843	0.205573	0.219786	0.0823145	1.40353	0.514327	0.0272745	0.082269	0.340897	0.188231
	105	-0.0305155	0.176887	0.0381044	0.0183536	0.215569	0.175054	0.201104	0.0928418	0.134327	0.185879	0.364387	0.179239													0.0287702	0.424538	-0.0745197	0.644084	0.419945	0.109903	-0.0253178	0.376137	0.0242557	0.0517951	0.0348585	0.212655	0.0613203	0.0104451	-0.107111	0.197807	0.176406	0.11753	1.42533	0.498722	0.0338185	0.0758815	0.333217	0.2415
	108	-0.0557502	0.134904	0.0106203	0.0116975	0.230269	0.154671	0.185973	0.0745838	0.209713	0.201096	0.369769	0.161662													0.0473858	0.369265	-0.0576051	0.608945	0.415221	0.0579045	-0.0254606	0.364958	0.0473045	0.061681	0.0554448	0.254369	0.0630062	-0.0146349	-0.147498	0.199468	0.155147	0.108552	1.41278	0.535787	0.0234056	0.0685193	0.337379	0.194288
	111	-0.0499076	0.143874	0.0740656	0.00392106	0.266825	0.128543	0.212111	0.112281	0.190352	0.23285	0.351764	0.176655													0.0453726	0.357318	-0.0181707	0.669215	0.406841	0.0704926	0.0302772	0.322692	-0.0441286	0.0843283	0.0133945	0.173362	0.0606686	-0.0154375	-0.189928	0.194273	0.16781	0.119571	1.42435	0.486012	0.0276523	0.0928305	0.327027	0.167877
	114	-0.0977959	0.116428	0.0437622	0.0112102	0.221314	0.142015	0.187412	0.0801678	0.214721	0.213452	0.33848	0.152086													0.0333422	0.299535	-0.00698825	0.578811	0.40293	0.090756	-0.0206826	0.317742	-0.0258329	0.0601283	-0.0349755	0.161496	0.0508484	0.00708237	-0.123986	0.180435	0.178752	0.0906787	1.38504	0.533066	0.0184802	0.0941451	0.391461	0.14697
	117	-0.108672	0.148883	0.0645664	-0.00682559	0.21498	0.11357	0.188404	0.0319411	0.225882	0.214229	0.356809	0.15204													0.0695571	0.356711	0.00672293	0.543036	0.428772	0.0914708	-0.0272646	0.313106	-0.0904969	0.0481823	-0.0390229	0.15661	0.0558728	0.0125216	-0.174583	0.202897	0.173419	0.107274	1.38034	0.488581	0.0301902	0.0865648	0.332423	0.17539
	120	-0.0833952	0.140796	0.0342854	0.0131616	0.199352	0.0851497	0.218602	0.0690699	0.146481	0.205029	0.347831	0.12164													0.0364212	0.394798	-0.00164181	0.486385	0.385597	0.0402797	-0.00889938	0.301247	-0.0917286	0.0875819	-0.048103	0.192408	0.0572406	0.0169535	-0.172796	0.180315	0.170907	0.0876299	1.39992	0.511931	0.034324	0.0861176	0.369803	0.155682
	123	-0.0942136	0.13069	0.0350459	0.000949777	0.219328	0.113765	0.168776	0.056476	0.213883	0.19817	0.343917	0.138377													0.0104108	0.385971	-0.0134566	0.475796	0.349967	0.0540779	-0.0180052	0.287656	-0.0748529	0.0653238	-0.0676844	0.19577	0.0489031	-0.0181201	-0.105348	0.173672	0.181218	0.0497525	1.36124	0.494632	0.0302427	0.0811217	0.361183	0.108065
	126	-0.104284	0.177027	0.0353708	0.00609169	0.175599	0.104726	0.137003	0.0505881	0.258837	0.196072	0.302695	0.102268													0.031378	0.436646	-0.00818893	0.473893	0.331114	0.0705349	-0.0508876	0.272402	-0.0839202	0.0279691	-0.104284	0.139515	0.0420041	-0.026585	-0.101096	0.188843	0.166188	0.0646369	1.38282	0.555941	0.0294334	0.0806438	0.381085	0.145154
	129	-0.102611	0.150926	0.000637072	-0.0101659	0.173806	0.0581819	0.139604	0.0592461	0.218215	0.157806	0.319728	0.113724													0.0149103	0.396259	0.0138042	0.440142	0.311264	0.094087	-0.030901	0.294089	-0.150899	0.0633909	-0.134301	0.169506	0.033632	-0.0156339	-0.122491	0.185786	0.163852	0.052179	1.38995	0.484262	0.0236763	0.0788497	0.379948	0.164821
	132	-0.0974514	0.166222	-0.0122286	0.00402738	0.175577	0.0798017	0.158442	0.055307	0.167082	0.149684	0.264191	0.106184													0.0325726	0.36984	0.0138027	0.376473	0.338753	0.126956	-0.00681813	0.292678	-0.121047	0.0100851	-0.108698	0.196795	0.0401101	-0.0263342	-0.126806	0.17775	0.150179	0.0735766	1.40136	0.487969	0.0191507	0.0830869	0.317099	0.139716
	135	-0.0860872	0.152257	0.0594014	0.000816142	0.172984	0.0729137	0.171988	0.047052	0.0727971	0.140539	0.30051	0.117919													0.0218454	0.362361	0.0126226	0.360687	0.359969	0.0437016	-0.00616051	0.284821	-0.141957	0.0798622	-0.142163	0.158358	0.0528853	-0.0232374	-0.140619	0.160223	0.163916	0.0724666	1.3983	0.519818	0.027334	0.0807101	0.350509	0.1304
	138	-0.0749027	0.189957	0.0295081	-0.0100419	0.169583	0.074519	0.198981	0.0120678	0.0335459	0.147486	0.292898	0.0878198													0.0155807	0.389006	0.0343684	0.342029	0.367333	0.0762727	-0.0350776	0.27648	-0.133199	0.0312783	-0.176913	0.192282	0.0415349	-0.0120131	-0.157941	0.21278	0.174008	0.0871298	1.39877	0.494108	0.0388946	0.0592752	0.355703	0.15964
	141	-0.0485084	0.172106	0.0089935	0.00333027	0.160194	0.0540498	0.209952	0.0211704	-0.0395637	0.150555	0.291149	0.0692586													-0.00724755	0.383481	0.025725	0.23202	0.367874	0.0572695	-0.0271913	0.267851	-0.134477	0.01545	-0.132636	0.191906	0.0361774	-0.0200863	-0.095816	0.208747	0.14991	0.0451247	1.39443	0.508043	0.0154966	0.0879818	0.331943	0.136444
	144	-0.072219	0.139348	0.0148255	-0.00252653	0.176677	0.0357231	0.155138	0.0204115	-0.0382356	0.134463	0.274555	0.0514859													0.0647423	0.379645	0.0346129	0.232377	0.25666	0.0685829	-0.0668005	0.26516	-0.211779	0.0166305	-0.120955	0.193376	0.0533438	-0.0193239	-0.0950764	0.167213	0.149688	0.0610406	1.39085	0.466378	0.0353993	0.09403	0.318619	0.11712
	147	-0.0569992	0.117985	-0.0273212	-0.00677387	0.128016	0.0832843	0.140402	0.044121	0.0255308	0.151757	0.342443	0.039305													0.0445862	0.397269	0.0373974	0.178145	0.256198	0.0833339	-0.0637	0.27075	-0.181473	0.0453621	-0.18603	0.153099	0.0412382	-0.0295337	-0.124359	0.145837	0.134225	0.0207655	1.37698	0.492565	0.0341347	0.0888822	0.311961	0.112864
	150	-0.100402	0.117812	0.0105987	0.000934849	0.164403	0.0784433	0.231996	0.0324509	-0.0141988	0.11993	0.326596	0.0449371													0.0384433	0.353411	0.0330855	0.154294	0.314412	0.053054	-0.091376	0.264551	-0.160769	0.0246136	-0.157738	0.164947	0.0477492	-0.0264285	-0.168035	0.179585	0.146712	0.0139294	1.35954	0.494606	0.0164629	0.0653483	0.323043	0.123338
	153	-0.0953872	0.11444	0.00864832	0.00340551	0.178328	0.0532416	0.194542	0.0218726	0.0466314	0.109595	0.263791	0.0298751													0.0471947	0.353659	0.0172195	0.139953	0.235377	0.0788331	-0.0328202	0.261486	-0.155671	0.0556499	-0.10359	0.148696	0.046188	-0.0546177	-0.122451	0.192293	0.142221	-0.0324085	1.39006	0.440721	0.0295557	0.0736933	0.314609	0.127418
	156	-0.0868554	0.111571	-0.0120287	-0.0170933	0.144257	0.0479344	0.188501	0.0272272	-0.00858281	0.105389	0.262115	0.0185073													0.0145763	0.375814	-0.0280553	0.0985265	0.26593	0.0437642	-0.0682189	0.253297	-0.153407	0.0309065	-0.0811962	0.174065	0.03288	-0.0403551	-0.108203	0.160586	0.110717	0.0223799	1.07593	0.427695	0.0200736	0.0833375	0.352311	0.115046
	159	-0.114694	0.111983	-0.0501396	-0.0164547	0.148998	0.0654322	0.189982	0.0111712	-0.0634891	0.111739	0.262774	0.0157978													0.0206592	0.384724	-0.0170963	0.152945	0.276242	0.0147179	-0.0491786	0.260082	-0.264707	0.0114901	-0.131843	0.159074	0.0359249	-0.0668813	-0.138175	0.206102	0.145115	0.00130642	1.0527	0.402749	0.0494925	0.0810051	0.344743	0.101848
	162	-0.0975731	0.0879886	-0.0474155	-0.0220139	0.137043	0.0546458	0.173175	-0.0286191	-0.091921	0.094745	0.228878	-0.00485035													0.000601393	0.266093	-0.0287677	0.0629045	0.286276	0.0718354	-0.0931239	0.283909	-0.161904	0.0487342	-0.0929286	0.178531	0.0371478	-0.0633465	-0.136739	0.200642	0.112537	0.00440073	1.02942	0.435914	0.0318035	0.0826568	0.35561	0.0593879
	165	-0.110402	0.112579	-0.0306913	-0.0125742	0.141309	0.066686	0.205933	-0.00312821	-0.054642	0.0967761	0.189994	0.0526133													0.0027218	0.304062	-0.0435024	0.0464269	0.182938	0.0866879	-0.0625553	0.26481	-0.241275	0.0473673	-0.0902774	0.188656	0.0299957	-0.0661308	-0.09909	0.167059	0.127504	0.00277471	1.02857	0.394498	0.0182935	0.0780875	0.340217	0.0791967
	168	-0.136841	0.138677	-0.0386537	-0.0381672	0.125725	0.0650471	0.192461	-0.00889823	-0.0220261	0.0871105	0.164867	0.0312017													-0.0272585	0.269137	-0.0593007	0.148743	0.224379	0.0762197	-0.080237	0.274819	-0.242401	0.00372572	-0.118192	0.170323	0.0488043	-0.0688171	-0.130075	0.164831	0.141159	-0.0268391	1.0312	0.408904	0.0129594	0.0878184	0.324871	0.0907763
	171	-0.167245	0.148291	-0.0268446	-0.0187047	0.131831	0.0774192	0.228421	-0.019486	-0.0256798	0.0751246	0.153257	0.0261143													-0.00316951	0.281291	-0.0565959	0.0469374	0.251952	0.0435658	-0.0936557	0.258128	-0.234017	0.0665837	-0.102945	0.17381	0.0318046	-0.056847	-0.121094	0.13112	0.129564	-0.0360603	0.98864	0.36341	0.0263196	0.094035	0.342643	0.0434501
	174	-0.147187	0.172237	-0.0287906	-0.0220042	0.114612	0.0956861	0.146263	-0.0224056	-0.112916	0.103057	0.188132	0.0323794													-0.0190133	0.246517	-0.0559404	0.0531688	0.185153	0.0845972	-0.0667138	0.262677	-0.247391	0.0706473	-0.13387	0.151566	0.0306884	-0.054274	-0.0977466	0.165584	0.119952	-0.0265786	1.00386	0.377951	0.0456964	0.0773008	0.326806	0.00963229
	177	-0.138279	0.157868	-0.0413575	-0.0216677	0.137353	0.0941052	0.146232	-0.0488412	-0.152483	0.096835	0.156516	0.0642925													0.018801	0.28275	-0.0590332	0.0361476	0.196679	0.0506302	-0.0387575	0.261123	-0.233121	0.0367072	-0.164742	0.162229	0.00759506	-0.0299478	-0.0865307	0.184037	0.12056	-0.0271168	1.00198	0.416563	0.0225521	0.0846603	0.331265	0.0531971
	180	-0.115216	0.157457	-0.0455455	-0.0321501	0.0846912	0.113219	0.243158	-0.0202996	-0.174222	0.0911794	0.1187	0.043931													-0.0265786	0.278962	-0.0806972	0.0513185	0.222228	0.0608801	-0.0851572	0.258342	-0.225696	0.0198337	-0.164961	0.141911	0.0228756	-0.00777648	-0.132712	0.176779	0.129694	-0.00265518	0.959239	0.382493	0.0406592	0.0765088	0.333843	0.0451582

## Sheet: Figure4H
Figure 4H
	Decay constant (s-1)
	DMSO	SMIFH2
	0.0154772	0.129023
	0.0132481	0.0797052
	0.0355092	0.0182077
	0.0160875	0.31225
	0.0258022	0.119482
	0.0245549	0.0390071
	0.0237987	0.151069
	0.0179826	0.0283781
	0.00111467	0.0348112
	0.0298984	0.011648
	0.0198601	0.00077457
	0.0341987	0.0224372
		0.00596827
		0.00077547
		0.0427245
		0.0469951
		0.0321576
		0.0197293
		0.0296114
		0.0160559
		1.29375e-05
		0.0201449
		0.0837879
		0.0153844

## Sheet: Figure4I
Figure 4I
	Fluorescence versus time
	Time (s)	DMSO																				PNB (10uM)
	0	0.502923	1.42244	0.623091	0.516395	0.881045	0.638157	0.76607	1.03989	0.962973	1.60682	0.284092	0.850618	1.80282	0.927903	1.65159	1.63817	0.885009				1.55237	1.64103	0.631545	1.09963	0.673971	1.08576	0.838735	1.87431	1.06424	0.853143	1.59078	1.30076	1.28333	0.840599	0.648926	1.24372	1.1917	0.917478	0.211651
	3	0.36026	1.40611	0.490187	0.517195	0.648781	0.447614	0.751542	1.27926	0.471229	1.49138	0.185964	0.514454	1.644	1.14088	1.32258	0.981006	0.685692				1.5835	1.18553	0.66044	0.736861	0.685157	0.942191	0.631775	1.02178	0.784162	0.936231	1.41589	1.2386	1.14754	1.13755	0.773659	1.14847	1.0277	0.633446	0.292727
	6	0.256892	1.25247	0.278047	0.365853	1.14834	0.262632	0.558851	0.898611	0.543948	0.910547	0.135513	0.690644	1.46017	1.04881	1.01891	1.14885	0.458052				1.38266	1.02175	0.646318	0.649615	0.675121	0.912074	0.532616	1.16334	0.547275	0.653234	1.13903	1.05689	1.03384	0.845076	0.926242	0.856621	0.976477	0.624011	0.442621
	9	0.192725	1.14707	0.249108	0.360154	1.10187	0.239993	0.415543	0.800629	0.613206	0.950997	0.00906452	0.762733	1.3874	1.08195	0.851525	0.798353	0.435872				1.46032	1.17851	0.561736	0.659328	0.648326	0.65572	0.395763	0.726112	0.680839	0.819595	1.28733	0.989526	0.984123	0.90863	0.995129	0.665121	0.936517	0.495588	0.610242
	12	0.112987	1.12219	0.20536	0.384189	0.878292	0.201541	0.386574	0.688088	0.42913	0.917563	0.0591144	0.476833	0.877721	0.920434	0.914239	0.71823	0.437404				1.56249	0.90626	0.584888	0.626256	0.394079	0.669396	0.31861	0.474635	0.291156	0.739004	0.839181	0.978405	0.856789	0.568141	0.897938	0.628838	0.717694	0.449865	0.0980675
	15	0.0644148	1.08247	0.193256	0.350358	0.929692	0.190993	0.283066	0.733054	0.505615	0.533944	0.0912715	0.537625	1.09755	0.747093	0.554093	0.557195	0.387147				1.59886	0.944015	0.554764	0.640644	0.49094	0.750724	0.194631	0.417678	0.345612	0.602497	0.937944	0.499232	0.5326	0.7288	0.97969	0.563276	0.667561	0.343383	0.142734
	18	0.0216274	0.96968	0.10611	0.34191	0.934388	0.174667	0.224423	0.685156	0.416106	0.585902	0.118746	0.537477	1.19408	0.77732	0.612301	0.588117	0.369105				1.61982	0.992907	0.584332	0.604865	0.488073	0.752453	0.256434	0.544213	0.396719	0.670478	0.870078	0.57153	0.557075	0.778761	0.999223	0.487619	0.647168	0.339313	0.205244
	21	-0.0154355	0.776384	0.094079	0.325048	0.801572	0.105598	0.215783	0.556864	0.377497	0.615173	0.0900458	0.616577	1.26297	0.91118	0.673053	0.497483	0.366103				1.53552	0.958403	0.58306	0.601111	0.410958	1.11816	0.1738	0.285501	0.382555	0.521318	0.728603	0.532297	0.587788	0.862527	0.958635	0.347746	0.564803	0.318891	0.295015
	24	-0.0309313	0.746997	0.0587262	0.314958	0.654694	0.124519	0.294166	0.508351	0.317163	0.613066	0.118735	0.423974	1.29676	0.772001	0.514074	0.442439	0.329703				1.3498	1.07042	0.578317	0.549901	0.393675	1.05936	0.123884	0.105015	0.340898	0.374901	0.736811	0.550206	0.610637	0.84383	0.901312	0.452907	0.533594	0.312479	0.313458
	27	-0.0229345	0.685862	0.000628901	0.305511	0.690921	0.113543	0.229786	0.523937	0.351791	0.390614	0.0538364	0.445639	1.25545	0.763095	0.479175	0.374684	0.2509				1.33958	0.903791	0.482271	0.590818	0.344504	1.0077	0.110239	0.154594	0.315235	0.358197	0.741537	0.543262	0.696419	0.658724	0.650244	0.532505	0.565068	0.359767	0.289403
	30	-0.0378131	0.690968	-0.00393356	0.297072	0.739851	0.0921469	0.21054	0.478384	0.310566	0.498861	0.0524167	0.413676	1.14421	0.384831	0.409042	0.257761	0.269795				1.29817	0.838687	0.491453	0.559258	0.335798	0.878376	0.152059	0.159514	0.167029	0.407882	0.579171	0.594161	0.654575	0.839368	0.624094	0.475559	0.568826	0.292266	0.3538
	33	-0.0425942	0.623352	-0.0150971	0.244195	0.684774	0.0821049	0.149393	0.296095	0.229674	0.364745	0.0634798	0.467597	0.941844	0.743716	0.327482	0.36741	0.240613				1.25306	0.606523	0.496621	0.554367	0.332219	0.844777	0.17036	0.0849184	0.221341	0.320079	0.641398	0.462718	0.479766	0.545717	0.703787	0.361649	0.555497	0.296765	0.297248
	36	-0.0414567	0.592517	-0.00650057	0.25372	0.780991	0.0423746	0.144199	0.328909	0.187301	0.422557	0.0475097	0.458813	0.991688	0.73798	0.195262	0.364277	0.265997				1.14234	0.739117	0.507914	0.561392	0.327412	0.830672	0.153432	0.000161112	0.202652	0.277855	0.567316	0.502415	0.452852	0.5811	0.699647	0.301411	0.543176	0.217622	0.3972
	39	-0.0488131	0.546792	-0.0272577	0.243822	0.778551	0.0531276	0.216906	0.291051	0.19426	0.44169	0.081683	0.349833	0.985187	0.781414	0.133504	0.389921	0.240649				1.04941	0.564072	0.509111	0.499022	0.324855	0.83624	0.120631	-0.022761	0.193901	0.374788	0.592461	0.460152	0.60269	0.524279	0.757039	0.377083	0.53106	0.220687	0.386841
	42	-0.0432064	0.487299	-0.0653269	0.241823	0.731384	0.0479027	0.124807	0.289829	0.14385	0.316344	0.0864514	0.341127	0.949334	0.749776	0.14506	0.303024	0.274294				0.988368	0.628728	0.502284	0.505824	0.317988	0.801384	0.0719295	0.068182	0.189066	0.366718	0.478313	0.523381	0.581299	0.617194	0.729445	0.394583	0.428671	0.288927	0.16299
	45	-0.0418232	0.448429	-0.0425114	0.224391	0.622082	0.00893258	0.20184	0.318354	0.172819	0.302493	0.0783567	0.376198	1.04848	0.748255	0.179228	0.312404	0.237743				0.871819	0.672575	0.414234	0.484718	0.306715	0.808613	0.0537055	-0.06882	0.257848	0.294933	0.503569	0.475766	0.520494	0.472344	0.621113	0.418952	0.458742	0.267822	0.205104
	48	-0.0511183	0.344641	-0.0398268	0.235153	0.757078	0.017769	0.253522	0.268316	0.155127	0.285709	0.0230238	0.395555	0.325106	0.78803	0.156403	0.289142	0.228908				0.800361	0.595599	0.411536	0.46243	0.257613	0.588297	0.0720302	-0.0567678	0.22502	0.259164	0.645786	0.406784	0.580362	0.560033	0.608608	0.417957	0.429372	0.302358	0.166066
	51	-0.0443285	0.243632	-0.0418663	0.224733	0.799984	0.0156224	0.128154	0.210524	0.118537	0.258518	0.0448341	0.352619	0.673879	0.787856	0.178034	0.287856	0.207641				0.683549	0.612228	0.408034	0.41361	0.264697	0.526219	0.0870547	-0.119647	0.126238	0.300195	0.480379	0.423946	0.541913	0.416116	0.632709	0.354662	0.414117	0.325358	0.223497
	54	-0.0455521	0.26824	-0.0576496	0.217244	0.786715	0.00217754	0.150317	0.143478	0.056365	0.310583	0.0549244	0.457235	0.68659	0.799225	0.212862	0.154489	0.169711				0.621882	0.544623	0.359331	0.431891	0.205594	0.560688	0.103583	-0.242734	0.139943	0.328872	0.520269	0.401952	0.724058	0.341949	0.673063	0.370619	0.451723	0.243289	0.19379
	57	-0.0434435	0.213535	-0.0429221	0.21958	0.738143	-0.00850547	0.00745733	0.131625	0.0109687	0.264467	0.0473352	0.154749	0.690902	0.747962	0.0468394	0.230188	0.188931				0.576088	0.568246	0.369849	0.425657	0.210443	0.526847	0.051536	-0.0443852	0.164446	0.343136	0.495301	0.431154	0.62205	0.395809	0.626926	0.365857	0.410126	0.229273	0.234287
	60	-0.0466671	0.192667	-0.0140027	0.193524	0.659418	-0.00750679	-0.0149945	0.137356	0.00136003	0.231656	0.0636668	0.187394	0.760878	0.600733	0.114843	0.230025	0.17476				0.416853	0.514961	0.342464	0.396224	0.188072	0.44913	0.0826519	-0.0640814	0.24694	0.203562	0.438333	0.315197	0.597079	0.478143	0.671967	0.342013	0.364455	0.225673	0.239073
	63	-0.0380104	0.159664	-0.0366639	0.195116	0.578172	0.0325233	-0.000203129	0.162702	-0.0404672	0.241072	0.0542598	0.167472	0.831165	0.666251	0.0611506	0.197374	0.14022				0.35221	0.556412	0.33936	0.38934	0.193225	0.431275	0.100356	-0.0116599	0.222456	0.159363	0.375876	0.345957	0.64449	0.533875	0.626947	0.255113	0.314803	0.291454	0.236058
	66	-0.0620812	0.110469	-0.0344745	0.185517	0.583772	-0.0320393	-0.0277815	0.116407	-0.0619451	0.235101	0.0391657	0.210161	0.726734	0.645351	0.0157641	0.21695	0.108921				0.350117	0.463399	0.181265	0.406647	0.15627	0.407055	0.0872159	-0.0107522	0.18201	0.210811	0.427279	0.33537	0.543205	0.328533	0.574089	0.238964	0.365455	0.238195	-0.044914
	69	-0.0413432	0.0893072	-0.0378655	0.185011	0.649662	-0.027825	-0.0195209	0.10622	-0.0388703	0.229494	0.0308136	0.194277	0.691588	0.61438	-0.00344291	0.185413	0.16112				0.287722	0.378533	0.245108	0.378927	0.13297	0.388302	0.0671481	-0.035421	0.212511	0.245611	0.350853	0.29983	0.526783	0.328998	0.460818	0.309709	0.355813	0.294729	0.00966784
	72	-0.0382582	0.0153847	-0.0376561	0.179102	0.623213	-0.0248125	-0.0457278	0.1267	-0.0562953	0.258696	0.0187031	0.229746	0.62451	0.635785	-0.0597191	0.27648	0.134387				0.33041	0.125035	0.254514	0.335666	0.133291	0.373371	0.0526305	-0.0529061	0.1637	0.174208	0.380055	0.322442	0.526216	0.252083	0.476147	0.227994	0.432437	0.264562	0.0204359
	75	-0.0467384	-0.0186096	-0.0449957	0.16879	0.60689	-0.0251723	-0.0390218	0.13142	-0.0235082	0.169833	0.017206	0.180283	0.57046	0.641145	-0.0208623	0.158681	0.157282				0.266882	0.157056	0.245446	0.336238	0.118219	0.346809	0.0791292	0.0637757	0.17056	0.196863	0.344848	0.345289	0.534408	0.341135	0.496531	0.187762	0.365191	0.218865	0.00995294
	78	-0.0333795	-0.051249	-0.0494219	0.16638	0.699799	-0.0388912	-0.0204962	0.0336416	-0.0435661	0.0968817	-0.00307714	0.249388	0.611322	0.678187	0.0743905	0.142821	0.136439				0.261906	0.115336	0.223504	0.246933	0.116196	0.289996	0.0313238	-0.0625029	0.227022	0.149269	0.299988	0.374338	0.539521	0.345796	0.47216	0.224657	0.415893	0.238194	0.0282453
	81	-0.0359001	-0.0503349	-0.0424757	0.166967	0.659948	-0.039678	-0.0192622	0.0402112	-0.0354403	0.0894815	-0.012939	0.193872	0.618052	0.644342	0.101184	0.234143	0.132098				0.164152	0.146078	0.235678	0.196943	0.114074	0.313337	0.0370696	-0.32261	0.126893	0.130916	0.448927	0.356659	0.53674	0.360149	0.504723	0.327554	0.391874	0.221991	0.0169069
	84	-0.0485905	-0.0497965	-0.0241894	0.15472	0.560534	-0.0178349	0.0911142	0.137226	-0.036574	0.0746197	-0.0252131	0.153979	0.581122	0.687125	0.0260215	0.135904	0.138178				0.16369	0.128505	0.236955	0.196342	0.104474	0.332456	0.0417927	-0.356226	0.146924	0.100585	0.400364	0.356674	0.647369	0.218402	0.462527	0.218623	0.354353	0.206606	0.115011
	87	-0.0363572	-0.0375241	-0.0697218	0.14871	0.434578	-0.0612492	-0.00906484	0.129391	-0.00985794	0.0780016	0.0152902	0.199805	0.57135	0.664002	0.0582878	0.126453	0.11078				0.137207	0.0950494	0.232579	0.198932	0.0997098	0.306425	0.0576788	-0.270317	0.14259	0.160873	0.405176	0.360225	0.573452	0.267425	0.519285	0.268878	0.385508	0.241458	0.168654
	90	-0.0233941	-0.0311735	-0.0264944	0.154587	0.481007	-0.0660337	-0.0677054	0.151319	-0.0283423	0.118716	0.0334692	0.206986	0.562622	0.657894	0.00380013	0.101649	0.153498				0.135088	0.0830346	0.257206	0.215256	0.096842	0.30908	0.0704274	-0.166844	0.173915	0.155679	0.40257	0.258701	0.520378	0.299233	0.515035	0.267213	0.363886	0.190321	0.115686
	93	-0.0370743	-0.0587756	-0.0148941	0.147759	0.591762	-0.028136	-0.0696469	0.0815488	-0.00918562	0.118099	-0.00302923	0.202185	0.624386	0.623722	-0.0131538	0.0864341	0.139759				0.157337	0.0855447	0.220178	0.217644	0.094862	0.172139	0.013916	-0.244742	0.127901	0.13355	0.398388	0.288935	0.445586	0.374997	0.502027	0.244793	0.354651	0.187406	0.174828
	96	-0.035481	-0.109291	-0.0416049	0.116975	0.58594	-0.0353351	-0.127299	0.0805909	0.0174497	-0.0417128	0.0258012	0.0947664	0.589454	0.663205	0.0168642	0.121607	0.120244				0.0919702	0.0182087	0.211821	0.181802	0.116378	0.197125	0.00948305	-0.178881	0.0878677	0.132034	0.327696	0.301903	0.453051	0.21796	0.499522	0.280532	0.430466	0.192077	0.106824
	99	-0.0420489	-0.109866	-0.0675821	0.101051	0.598417	-0.066681	-0.0175619	0.0668081	-0.0198267	0.042982	-0.0368051	0.0741481	0.570369	0.635816	-0.0507954	0.13447	0.134804				0.0667347	0.0301286	0.198584	0.187678	0.0931047	0.163332	0.0537683	-0.276541	0.110924	0.0338645	0.268832	0.294384	0.496372	0.28623	0.499402	-0.0106122	0.291728	0.161096	-0.0252489
	102	-0.0396058	-0.115387	-0.0855926	0.103665	0.535216	-0.0483726	-0.0839555	0.00768084	-0.0647576	-0.00794462	0.0141136	0.131985	0.577236	0.525911	-0.104806	0.106043	0.0923497				0.0196098	-0.0435629	0.195151	0.200157	0.0864055	0.194805	0.0484142	-0.304965	0.085187	0.0712868	0.226743	0.263123	0.542573	0.30483	0.524498	0.0950297	0.475342	0.12891	0.0121831
	105	-0.0276505	-0.12232	-0.0835531	0.0935981	0.46665	-0.0125153	-0.0789702	0.111817	-0.050984	0.083925	-0.0124253	0.0935226	0.612637	0.564049	0.0430128	0.145728	0.0825442				0.0324513	-0.0201928	0.191441	0.143432	0.0696607	0.211317	0.0462677	-0.108525	0.139299	0.0254257	0.324737	0.282334	0.466355	0.251424	0.507765	0.0691013	0.531037	0.164778	-0.0274854
	108	-0.0240754	-0.120491	-0.0789987	0.0872832	0.385512	-0.0738939	-0.0969636	0.00312434	-0.0359051	-0.0317438	0.0261446	0.103015	0.464839	0.500793	-0.101125	0.174914	0.0869407				0.0183321	-0.110208	0.176767	0.119381	0.069517	0.191228	0.0200955	-0.168229	0.051672	0.056702	0.321671	0.311459	0.447828	0.358503	0.481515	0.0886619	0.356844	0.183386	0.0015498
	111	-0.0374136	-0.125567	-0.0824993	0.0784504	0.436257	-0.0677461	-0.0534504	0.0507762	-0.0293039	0.073608	0.0279423	0.0377252	0.546451	0.532099	-0.120186	0.0821405	0.0890524				0.0554517	-0.0870084	0.163973	0.135769	0.0648144	0.158488	-0.00044554	-0.282115	0.0885783	0.0676516	0.259738	0.262354	0.553697	0.251995	0.433037	0.054245	0.360624	0.128143	0.0061858
	114	-0.0501876	-0.118802	-0.0650287	0.0819127	0.5	-0.0243683	-0.0548998	0.0216438	-0.0310896	0.00142451	0.0541224	0.125836	0.506296	0.575116	0.0142462	0.0587105	0.120511				0.0319908	-0.147658	0.128551	0.104627	0.0544943	0.151095	-0.0531177	-0.306318	0.0940042	0.0501804	0.300566	0.282815	0.468337	0.319827	0.500649	0.146405	0.28439	0.186157	0.032975
	117	-0.0315613	-0.160788	-0.108273	0.0709337	0.40552	-0.051469	-0.056651	0.0169739	-0.0267262	0.10048	0.0603935	0.0728712	0.384876	0.536191	0.0385187	0.1766	0.112936				0.0070871	-0.230582	0.110062	0.117525	0.0596762	0.162157	-0.0350563	-0.381406	0.115536	-0.000142051	0.304232	0.302195	0.536524	0.102053	0.493332	0.119256	0.364565	0.151492	-0.024793
	120	-0.0170912	-0.170784	-0.112263	0.0680055	0.499722	-0.0259284	-0.101918	-0.0320997	-0.0452123	0.0724635	0.0466541	0.0537584	0.446625	0.523359	-0.021142	0.171946	0.0889723				0.0184184	-0.347802	0.118789	0.0751902	0.0549238	0.139816	-0.0137783	-0.332598	0.122188	0.0436905	0.285111	0.253393	0.534745	0.0381639	0.498241	0.155674	0.365241	0.202198	0.0376449
	123	-0.0413392	-0.14056	-0.084749	0.0266372	0.475275	-0.0163796	-0.108281	-0.00593075	-0.0369269	-0.0722722	0.0176687	-0.000157141	0.354254	0.491385	-0.113913	0.164578	0.0889163				0.0453324	-0.327039	0.101184	0.0731119	0.0520967	0.118402	-0.0184231	-0.301026	0.101389	0.0731647	0.239554	0.297583	0.498304	0.392957	0.366373	0.0832419	0.355375	0.196355	-0.00045585
	126	-0.028822	-0.125032	-0.103283	0.0386839	0.386515	-0.0551674	-0.059283	-0.0118998	-0.041415	0.00386327	0.00853582	-0.00935266	0.437357	0.592899	-0.10135	0.128338	0.0901618				0.0311633	-0.35907	0.0890399	0.0578132	0.0509739	0.150199	0.0116087	-0.406434	0.115443	0.0298754	0.307271	0.321605	0.47838	0.182721	0.373719	0.150042	0.390166	0.186483	0.00194111
	129	-0.0402049	-0.145433	-0.101705	0.0375963	0.498694	-0.0212855	-0.114356	-0.0272797	-0.0541953	-0.115615	0.0129775	-0.0253326	0.409624	0.351124	-0.0956532	0.2098	0.0861948				0.0781292	-0.383237	0.0933201	0.0409935	0.0340524	0.109534	-0.0462979	-0.447375	0.101799	0.0138606	0.241203	0.26851	0.396414	0.0460991	0.390093	0.150831	0.421029	0.136194	0.0160823
	132	-0.0396031	-0.128264	-0.0878007	0.040307	0.332221	-0.0484187	-0.116647	0.105229	-0.0469393	-0.0606201	0.0263377	0.0730865	0.439375	0.368039	-0.0516067	0.176849	0.0970324				0.0614886	-0.374481	0.0984454	0.0671208	0.027163	0.0986371	0.0100652	-0.38233	0.0777852	0.0108501	0.337237	0.231654	0.441379	0.249213	0.3868	0.140432	0.410783	0.186975	-0.0460228
	135	-0.0284808	-0.136823	-0.0622393	0.0343743	0.361969	-0.0358986	-0.118678	0.0493315	-0.0816271	-0.0609673	0.00580769	0.0735467	0.348204	0.449797	-0.0328489	0.187096	0.0808933				0.0739467	-0.403717	0.0974217	0.0225288	0.0389873	0.0530048	-0.0330624	-0.456662	0.100058	0.00689222	0.256648	0.278961	0.514671	0.333752	0.337262	0.237208	0.428391	0.153244	-0.0416039
	138	-0.0415565	-0.131412	-0.0595341	0.0328314	0.289217	-0.0167576	-0.20182	0.0645987	-0.0448913	-0.0542396	-0.0214096	-0.0180829	0.41239	0.362747	-0.117584	0.193987	0.0841861				0.100403	-0.335849	0.0786994	0.0637037	0.0383489	0.0514466	-0.0105495	-0.39178	0.105318	-0.0142042	0.253377	0.275254	0.433504	0.283407	0.39597	0.227003	0.274774	0.133975	-0.0221329
	141	-0.0290682	-0.112401	-0.0750475	0.0141389	0.335522	-0.0506094	-0.180423	0.0402977	-0.0552636	-0.0519679	-0.0184718	-0.0179174	0.39808	0.346322	-0.0357804	0.216432	0.0737096				0.0686597	-0.365645	0.0790773	0.038705	0.0339839	0.00825508	-0.0209839	-0.291831	0.0608965	0.00648937	0.277149	0.244648	0.429658	0.102188	0.388725	0.189404	0.361097	0.141495	-0.0836205
	144	-0.0530471	-0.13029	-0.072864	0.0180028	0.346419	-0.0370706	-0.100082	0.0239197	-0.0236577	-0.034846	0.0153687	-0.0627689	0.34893	0.333254	-0.0684566	0.103906	0.0613557				0.0896737	-0.349365	0.0833705	0.055186	0.0251686	0.0230196	-0.0147726	-0.28034	0.0561976	-0.0251395	0.335655	0.306237	0.492336	0.187936	0.316343	0.014327	0.260287	0.160313	-0.0280268
	147	-0.0431658	-0.135593	-0.0613896	0.00460742	0.463691	-0.0607957	-0.197564	0.0061674	-0.0596661	-0.0757026	0.0652846	-0.0174738	0.352947	0.345019	-0.0190336	0.179721	0.0747323				0.024614	-0.370139	0.0758795	0.0794768	0.0241448	0.00348737	-0.0147678	-0.453067	0.0582663	0.0209238	0.21582	0.265375	0.511641	0.0999258	0.367648	0.101767	0.389148	0.206884	-0.0430411
	150	-0.0330264	-0.140185	-0.0572015	0.0200375	0.367682	-0.108399	-0.169352	-0.0482739	-0.0394125	-0.022295	0.0279404	-0.0111381	0.120745	0.366339	-0.125558	0.0560744	0.0907553				0.0217966	-0.341344	0.0384224	0.0522634	0.0233289	0.0229072	0.0366253	-0.446497	0.087716	0.0452822	0.346305	0.299803	0.499326	0.22057	0.357984	0.0607464	0.329191	0.19386	-0.042312
	153	-0.0313633	-0.149746	-0.0679636	0.0117067	0.268907	-0.0755391	-0.080887	0.00278752	-0.0929213	-0.113537	0.0349115	0.0183305	0.196915	0.331302	-0.162439	-0.0417141	0.057554				0.00244298	-0.343252	0.0308998	0.00319643	0.0202336	0.0126521	-0.0344852	-0.584901	0.0624922	0.0159322	0.260559	0.302999	0.550319	0.0966859	0.381621	0.0755776	0.307676	0.191266	0.0423916
	156	-0.0356453	-0.162468	-0.0698717	0.0110418	0.363111	-0.0558212	-0.0850913	0.0642094	-0.0555883	-0.0803998	0.00487442	-0.0311351	0.189537	0.274138	-0.0771489	0.0797316	0.0983567				-0.0103083	-0.360489	0.0337011	0.014182	0.0101152	0.0105779	-0.0426684	-0.398389	0.130318	0.047228	0.160319	0.314605	0.54803	0.0897347	0.370401	0.057766	0.324214	0.174361	-0.0187986
	159	-0.0389647	-0.14756	-0.0872838	0.018674	0.311435	-0.0587933	-0.139983	0.0232919	-0.0577525	-0.0614864	0.0127614	0.0234114	0.166691	0.368688	-0.057409	0.0551555	0.0669169				0.0779421	-0.373878	0.0457552	0.0231418	-0.00721703	0.0141898	-0.0253101	-0.349225	0.099567	0.0729162	0.10764	0.291174	0.469109	0.108535	0.39119	0.0955416	0.360241	0.115882	-0.00142733
	162	-0.0403199	-0.190798	-0.0834115	-0.00643777	0.277804	-0.0459057	-0.101236	-0.00736041	-0.0773421	-0.0657655	0.0107744	0.000717315	0.234413	0.281709	-0.171787	0.149211	0.0512414				0.0688857	-0.417551	0.0455157	0.0568126	-0.00771257	0.0141284	0.00885098	-0.517626	0.0580167	0.0693084	0.186267	0.23216	0.52524	0.112425	0.347221	0.173108	0.289774	0.118777	-0.0214088
	165	-0.0380738	-0.201174	-0.091512	-0.00881583	0.356351	-0.0245914	-0.15599	-0.0305937	-0.0761255	-0.0399927	0.0164789	0.00989975	0.211485	0.263355	-0.122086	0.179537	0.0524217				0.0476446	-0.459105	0.0476331	0.0410267	-0.00485085	-0.000781492	-0.0348141	-0.295528	0.031836	-0.0108946	0.228768	0.301308	0.489362	0.059811	0.358823	0.0862579	0.286719	0.143605	-0.0594356
	168	-0.0459648	-0.191654	-0.0837423	-0.0130459	0.260814	-0.069189	-0.163444	-0.0815774	-0.112101	-0.0310438	0.0609451	-0.0590726	0.179493	0.398107	-0.102472	0.112157	0.0789444				0.0551895	-0.442782	0.0431956	0.00246689	-0.0123906	0.0307059	-0.048896	-0.405039	0.0979205	-0.0157253	0.232489	0.317362	0.631026	-0.0196547	0.352721	0.150312	0.314357	0.144439	-0.0245705
	171	-0.0365655	-0.186898	-0.105199	-0.00329059	0.162684	-0.0486621	-0.158081	0.0413255	-0.111423	-0.0792259	0.00448677	-0.0597816	0.182942	0.312658	-0.0702453	0.102723	0.0768213				0.0529131	-0.445063	0.0452511	0.00845932	-0.00512706	0.029497	-0.0618652	-0.31258	0.0534881	-0.0271598	0.247951	0.234581	0.382353	0.127426	0.32934	0.129174	0.279137	0.124242	-0.070973
	174	-0.0424153	-0.183197	-0.0803831	-0.0137857	0.15245	-0.0455258	-0.0768553	0.0290446	-0.116093	-0.0911411	0.0325442	-0.0299854	0.157196	0.336642	0.0704595	0.0462799	0.0569597				0.0653763	-0.448365	0.0345734	0.000450027	-0.00436344	0.0411324	-0.0294529	-0.356835	0.060521	-0.0462357	0.138475	0.215858	0.372735	0.172684	0.393666	0.177456	0.302568	0.133558	0.0439856
	177	-0.0361279	-0.149528	-0.0625393	-0.013725	0.0883908	-0.0316314	-0.0989843	0.0105669	-0.0741812	-0.0736975	-0.00304348	-0.0501051	0.16019	0.296591	-0.179145	0.128509	0.0688008				0.0388475	-0.456761	0.0406121	0.001608	-0.00874966	0.0634161	-0.0773597	-0.345661	0.0892543	0.0566669	0.192063	0.247408	0.422885	-0.0209689	0.342159	0.1246	0.32312	0.100685	-0.0446572
	180	-0.0281907	-0.116321	-0.0894813	-0.0248758	0.209188	-0.0353421	-0.141204	0.0027699	-0.0915292	-0.119214	0.0418646	-0.0550659	0.261811	0.315241	-0.137818	0.141311	0.0575534				0.0455662	-0.445827	0.0311452	-0.00170554	-0.0110078	0.0501355	-0.0613085	-0.335237	0.0830855	0.00823821	0.200294	0.272454	0.391778	0.107127	0.312743	0.103972	0.319847	0.161853	-0.0475313

## Sheet: Figure4J
Figure 4J
	Decay constant (s-1)
	DMSO	PNB
	0.112889	0.017721
	0.000163243	0.064417
	0.0123242	0.0134068
	0.0240099	0.00818902
	0.0566844	0.0464126
	0.0130509	0.00955453
	0.0739883	0.00875026
	0.0272012	0.0642948
	0.00145793	0.0101323
	0.00951495	0.0231505
	0.0335074	0.0375264
	0.0430178	0.0204331
	0.0320933	0.0346336
	0.0605553	0.00829587
	0.0322963	0.0501659
	0.0398009	0.0863105
	0.0542876

## Sheet: Figure4K
Figure 4K
	Fluorescence versus time
	Time (s)	CTRL DMSO 30min																										CK-666 25uM
	0	1.34201	0.625944	1.40262	0.530061	0.756234	0.783148	0.994622	0.575104	0.623566	1.06361	1.88021	1.03791	0.773798	1.09907	1.51209												1.26712	0.599792	0.955424	0.978589	0.868395	2.04044	1.55047	0.0119034	1.5992	1.50082	1.56672	2.18128	1.33637	1.12086	1.13961	1.49171	1.68362	1.37428	1.40242	0.579387	0.939099	1.55868
	3	1.15325	0.535938	1.14545	0.557687	0.661296	0.599064	0.957889	0.543954	0.581342	0.850567	1.68453	0.868159	0.652461	0.745588	0.965163												1.19746	0.570242	1.16443	1.00051	0.733898	1.90616	1.40301	0.0881862	1.46471	1.32377	1.85588	1.81106	1.14861	0.929808	0.989931	1.15828	1.41796	1.4491	1.27935	0.479962	0.748314	1.58673
	6	0.56617	0.497412	0.565424	0.452218	0.276508	0.47461	0.86392	0.492352	0.437752	0.831555	1.26078	0.594428	0.404028	0.598602	0.809864												0.651842	0.600646	0.983112	0.930615	0.663316	1.45707	1.46009	0.528975	1.28221	1.07832	1.72493	1.7918	1.05465	1.04651	1.11208	1.50521	1.40812	1.37077	1.23978	0.530507	0.729389	1.24076
	9	0.821976	0.381429	0.637639	0.483104	0.225417	0.346349	0.705236	0.592894	0.428924	0.766607	1.27336	0.558618	0.423916	0.547546	0.794057												0.858247	0.624084	0.967628	0.783622	0.680274	1.62675	1.22426	0.634394	1.38055	1.4078	1.83665	1.83408	0.964648	1.00346	1.17306	1.41052	1.41846	1.34869	1.25401	0.446745	0.584269	1.26827
	12	0.818822	0.368457	0.629844	0.398114	0.218235	0.332782	0.708017	0.589379	0.400849	0.806992	1.01245	0.466793	0.377254	0.340484	0.600148												0.883954	0.625475	0.782701	0.789286	0.638237	1.7036	1.19265	0.814914	1.52896	1.46337	1.83061	1.60424	0.945875	1.02045	1.108	1.24361	1.43011	1.36666	1.1729	0.475867	0.660385	1.1821
	15	0.75924	0.303954	0.421453	0.424768	0.146003	0.33755	0.725503	0.483316	0.387504	0.710887	0.975253	0.429011	0.354051	0.348041	0.58415												0.877656	0.58983	0.75184	0.749923	0.642036	1.69315	1.27346	0.829214	1.40213	1.23259	1.74367	1.53496	0.81379	0.983159	1.02304	1.27813	1.37809	1.35507	1.26824	0.353579	0.667671	1.04374
	18	0.665472	0.274919	0.28161	0.38321	0.100534	0.33026	0.666328	0.487565	0.346455	0.726042	0.820121	0.373629	0.368549	0.304213	0.397195												0.745677	0.612528	0.795884	0.760603	0.648872	1.78276	1.0865	0.718936	1.20033	1.22627	1.21159	1.57908	0.718657	0.884312	1.03357	1.38846	1.1479	1.29905	1.26819	0.382933	0.592305	0.920603
	21	0.628604	0.244423	0.319789	0.320162	0.112195	0.301509	0.664547	0.507475	0.321518	0.729629	0.820166	0.435726	0.343327	0.167909	0.40187												0.767932	0.637314	0.599452	0.770294	0.6761	1.76869	1.06828	0.747983	1.16088	1.26415	1.13321	1.55836	0.673574	0.875489	1.09123	1.18765	1.22067	1.21558	1.1983	0.433318	0.610753	0.838955
	24	0.5319	0.213493	0.311962	0.299553	0.0882407	0.226393	0.638554	0.461934	0.326569	0.675159	0.817706	0.313173	0.265879	0.178877	0.362538												0.669431	0.631113	0.6256	0.666038	0.634519	1.66519	1.0479	0.718709	1.14495	1.21252	1.13028	1.47763	0.675737	0.775972	1.11788	1.2514	1.24656	1.2669	1.20929	0.439433	0.549068	0.849854
	27	0.518234	0.182024	0.274184	0.257443	0.0898869	0.171093	0.566648	0.443761	0.214137	0.512579	0.722397	0.312327	0.202173	0.242611	0.167964												0.6844	0.613364	0.687085	0.698655	0.554423	1.68953	1.04252	0.726854	1.20406	1.20946	1.03448	1.4791	0.57538	0.786269	1.13222	1.31944	1.08312	1.2652	1.15187	0.406705	0.514187	0.627951
	30	0.51179	0.136635	0.158786	0.279783	0.104286	0.123005	0.56378	0.421121	0.263536	0.532923	0.615438	0.258376	0.188154	0.158037	0.306458												0.687322	0.662346	0.759146	0.636592	0.568639	1.72338	1.07835	0.706873	1.2461	1.18515	0.997135	1.35285	0.537333	0.77913	1.05282	1.40229	1.10139	1.1942	1.10098	0.42371	0.528195	0.63949
	33	0.447847	0.144371	0.152677	0.283949	0.0775587	0.130012	0.523592	0.399266	0.266295	0.51732	0.583404	0.268369	0.154539	0.0523507	0.207754												0.637127	0.694924	0.70747	0.643998	0.574176	1.62216	1.05204	0.688036	1.13903	1.09143	0.823446	1.42723	0.52163	0.71768	1.07818	1.34814	1.04731	1.17194	1.16655	0.419671	0.561404	0.652736
	36	0.507811	0.113113	0.127633	0.225262	0.0973873	0.0387627	0.492919	0.32457	0.259179	0.524683	0.605369	0.296771	0.159761	0.116277	0.298375												0.565485	0.698835	0.677788	0.682288	0.577381	1.64178	1.05751	0.678382	1.14736	0.932804	0.790907	1.40477	0.596792	0.794432	1.02792	1.27586	1.06874	1.16763	1.21825	0.387192	0.46297	0.623102
	39	0.41203	0.134526	0.11646	0.224657	0.0576297	0.0739457	0.474447	0.37132	0.253676	0.541962	0.57337	0.198265	0.169918	0.0792715	0.20909												0.589908	0.732026	0.639062	0.657933	0.561929	1.66767	0.891686	0.635098	1.10429	0.960437	0.789896	1.21972	0.528968	0.742934	1.01377	1.12451	1.04335	1.15271	1.29185	0.399153	0.426181	0.565328
	42	0.37866	0.115403	0.150039	0.149468	0.0483314	0.032785	0.486419	0.325704	0.225841	0.54721	0.547948	0.168856	0.163851	0.136216	0.207961												0.581298	0.704187	0.704921	0.641969	0.480979	1.69455	1.03358	0.646484	1.0573	0.986777	0.689649	1.19104	0.57922	0.767613	1.02745	1.3076	1.12745	1.21414	1.27558	0.419819	0.443006	0.583181
	45	0.355311	0.112329	0.115437	0.176144	0.0266744	0.0324524	0.470609	0.333663	0.223986	0.550739	0.544688	0.198773	0.136216	0.221236	0.280441												0.50278	0.694528	0.733911	0.596589	0.449278	1.64427	1.07379	0.641257	1.1013	0.941053	0.703311	1.16342	0.507356	0.731683	0.979027	1.35367	1.11511	1.19302	1.04744	0.412415	0.403399	0.527617
	48	0.365268	0.0719959	0.106033	0.140061	0.045291	0.0214865	0.473418	0.290114	0.229312	0.558342	0.564053	0.193314	0.189597	0.121646	0.0853468												0.487353	0.717269	0.648462	0.624786	0.451248	1.50644	1.07905	0.566324	1.11606	0.936296	0.616208	1.11957	0.46938	0.703134	1.00409	1.30609	1.07862	1.21721	1.11252	0.405609	0.371366	0.490049
	51	0.316373	0.0971032	0.152159	0.0656253	0.0308113	0.0356254	0.447403	0.284699	0.0817173	0.469084	0.505935	0.151307	0.180318	0.135552	0.0192697												0.525462	0.730278	0.644243	0.58357	0.433728	1.54533	1.13626	0.575659	1.12503	0.894992	0.565951	1.13967	0.465613	0.660694	0.999341	1.3232	1.04093	1.05056	1.11961	0.39342	0.332262	0.534625
	54	0.293307	0.0473528	0.189107	0.0745816	0.0408129	0.0432559	0.423337	0.19145	0.155994	0.458158	0.465358	0.111683	0.169791	0.12637	0.0274018												0.499858	0.718222	0.626131	0.584441	0.419268	1.58931	1.03556	0.593504	1.22545	0.812189	0.588115	1.0854	0.471122	0.671231	1.00969	1.28476	1.15536	1.08624	1.14251	0.377603	0.348833	0.47739
	57	0.187541	0.0614621	0.198509	0.0531314	0.0629598	0.0218083	0.383982	0.16536	0.132039	0.445152	0.502001	0.0526796	0.210091	0.0632106	-0.0818123												0.480038	0.753375	0.629184	0.578567	0.425189	1.59632	1.06179	0.603851	1.11543	0.850167	0.412848	1.03069	0.32658	0.660378	1.02132	1.25292	1.09726	1.09506	1.19067	0.395165	0.335077	0.485045
	60	0.212602	0.0580015	0.204618	0.0403854	0.0550086	0.0743924	0.359704	0.109632	0.132691	0.436132	0.4997	0.126839	0.123981	0.0717128	-0.0553448												0.549152	0.787262	0.625161	0.559502	0.407934	1.5658	1.03009	0.614722	1.0828	0.746419	0.364469	1.02618	0.287577	0.673217	1.0493	1.06473	1.10016	1.1521	1.19292	0.358505	0.298739	0.40703
	63	0.194213	0.0717346	0.230987	0.0453175	0.0571127	0.0441265	0.392606	0.164148	0.130348	0.436207	0.45692	0.0818185	0.20867	0.0831843	-0.0890894												0.547653	0.789682	0.590824	0.58947	0.376673	1.51344	1.01386	0.550595	1.03212	0.714997	0.428132	0.921882	0.339452	0.613942	1.0311	1.09222	1.14215	1.08139	1.18058	0.385783	0.276309	0.464005
	66	0.120476	0.0608437	0.136594	0.0299689	0.0552195	0.0167818	0.381859	0.118142	0.147079	0.382111	0.395757	0.103909	0.117341	0.0331561	0.0341596												0.483759	0.801408	0.559896	0.573055	0.384768	1.35616	0.98717	0.476103	1.05593	0.709934	0.368432	1.01337	0.371127	0.654302	0.911318	1.05124	0.95642	1.06449	1.11314	0.394846	0.289141	0.503035
	69	0.106837	0.0500921	0.16505	0.0751985	0.102307	-0.0384013	0.365349	0.0781509	0.130696	0.361378	0.436276	0.0967214	0.124761	0.0945161	0.185078												0.446002	0.829928	0.52875	0.574514	0.378122	1.31067	1.0124	0.465022	0.923749	0.67921	0.302989	0.908239	0.269489	0.573323	0.899654	1.03089	0.937468	1.03048	0.980888	0.360896	0.284682	0.441458
	72	0.129306	0.038996	0.217719	0.0643621	0.0910097	-0.0453703	0.336879	0.127373	0.122967	0.361472	0.385585	0.10059	0.15791	0.0108148	0.0117228												0.476071	0.739555	0.564244	0.591411	0.396619	1.30938	0.907623	0.537613	0.914718	0.566173	0.312607	0.842349	0.291959	0.539602	1.16098	1.06996	0.973589	1.09189	1.00971	0.362405	0.248558	0.443524
	75	0.158347	0.0406241	0.239073	0.0181643	0.107445	-0.0591767	0.325169	0.0642063	0.0977632	0.356291	0.407465	0.0895599	0.123804	0.0176387	0.000187936												0.402522	0.748825	0.558599	0.549095	0.366894	1.27309	0.883989	0.542941	1.01008	0.523486	0.321338	0.924823	0.238618	0.5296	1.23115	0.933089	0.935512	1.07084	1.06074	0.353902	0.267087	0.37347
	78	0.161096	0.0460189	0.129735	0.020454	0.0793906	-0.0319617	0.268526	0.0401686	0.111253	0.392015	0.383077	0.0601003	0.163296	0.0367378	-0.129376												0.382415	0.759709	0.513515	0.524529	0.36398	1.24372	0.88346	0.525157	0.943244	0.533203	0.314889	0.797357	0.202211	0.529513	1.07144	0.942514	0.943156	1.10088	1.08651	0.337936	0.230518	0.360285
	81	0.172357	0.0361147	0.122013	0.0539629	0.0994111	-0.0452012	0.334693	0.0843659	0.115838	0.350675	0.365104	0.0953787	0.184294	0.0795743	0.175774												0.262586	0.755962	0.488681	0.539138	0.405851	1.21754	0.863256	0.483837	0.90313	0.548656	0.291389	0.737656	0.24552	0.491527	1.07709	0.935467	0.942895	1.09248	0.965671	0.343149	0.203054	0.418201
	84	0.160556	-0.0252607	0.0499117	0.0429987	0.116176	-0.0378817	0.306354	0.0763518	0.0699677	0.351619	0.366901	0.0716178	0.108562	0.117154	0.0107301												0.276747	0.727359	0.455791	0.506536	0.411534	1.15783	0.780498	0.458374	0.897065	0.486216	0.325556	0.756603	0.203369	0.494998	1.13078	0.88861	1.00429	1.09366	0.943543	0.363646	0.195657	0.425968
	87	0.111209	0.00325449	0.131581	0.0369255	0.110326	-0.0162332	0.26616	0.013294	0.0974669	0.336213	0.444759	0.110634	0.147961	-0.0223218	0.077681												0.324165	0.732311	0.423663	0.471066	0.391483	1.16684	0.71239	0.426956	0.916658	0.537445	0.318642	0.691789	0.209545	0.504124	1.10531	0.854035	0.964468	1.11728	0.980189	0.393051	0.203999	0.369547
	90	0.0834842	-0.00965883	0.093273	0.00650832	0.103472	-0.0129685	0.280607	0.0102363	0.0862485	0.30084	0.401986	0.0704187	0.164882	-0.03158	0.00364299												0.311642	0.72102	0.377371	0.435112	0.357514	1.12574	0.738963	0.442535	0.951989	0.527085	0.190008	0.657188	0.192467	0.527133	1.08041	0.815864	0.952775	1.06887	1.00004	0.371878	0.21726	0.369482
	93	0.0462247	0.0480037	0.160943	0.030333	0.112695	0.0138318	0.266014	0.0428904	0.0807999	0.257696	0.379347	0.0966173	0.191277	0.00853321	0.0174576												0.315345	0.733725	0.394514	0.456503	0.336522	1.11039	0.704051	0.41358	0.88143	0.454107	0.14429	0.599483	0.113182	0.48541	1.08312	0.692958	0.977924	1.05049	1.06245	0.306689	0.197885	0.290021
	96	0.0541923	0.0593348	0.177627	-0.00973185	0.119354	-0.017694	0.247935	0.020562	0.0877894	0.271258	0.370225	0.0939051	0.211222	0.0192966	0.120234												0.275105	0.725003	0.310049	0.44296	0.325779	0.935128	0.687401	0.398745	0.865669	0.466103	0.11609	0.593458	0.0662106	0.443094	1.09278	0.707784	0.985302	1.0914	1.06653	0.30997	0.232788	0.296458
	99	0.0659529	0.084495	0.19559	0.00883452	0.105848	-0.0303623	0.254308	0.0334585	0.0716087	0.261927	0.421063	0.105968	0.162766	0.029926	0.0634787												0.238473	0.748816	0.273879	0.423985	0.298553	1.00971	0.65867	0.390355	0.913583	0.412768	0.0941906	0.642165	0.0904658	0.455843	1.13185	0.656234	0.953545	1.06752	1.08449	0.321482	0.175507	0.328046
	102	0.0496704	0.0906942	0.214666	0.0157182	0.108456	-0.0272007	0.28382	0.0423754	0.088707	0.266183	0.351362	0.0852779	0.117083	0.04157	0.036585												0.218517	0.780351	0.280642	0.394141	0.320784	1.0007	0.608115	0.390796	0.907961	0.408383	0.109351	0.57997	0.0495578	0.42347	1.02072	0.651837	0.900592	1.06611	0.919749	0.322872	0.194775	0.271688
	105	0.0662541	0.075325	0.16204	0.0417787	0.136689	-0.0500097	0.223517	0.0201778	0.0942408	0.277729	0.326056	0.0401568	0.168987	-0.0352697	0.063806												0.252547	0.738761	0.223686	0.405763	0.28949	0.960964	0.623066	0.389713	0.919768	0.396598	0.15422	0.589842	0.101242	0.435192	1.00333	0.646999	0.891753	1.02619	0.950548	0.315761	0.193252	0.320768
	108	0.0960449	0.0717869	0.200352	0.0202619	0.111604	-0.0409943	0.200657	0.0292415	0.0656808	0.300348	0.320657	0.0559941	0.156698	-0.0430765	0.0461497												0.235778	0.721326	0.23574	0.372401	0.270824	0.944968	0.578344	0.40462	0.906618	0.388706	0.24447	0.544303	0.074292	0.396106	0.897909	0.68305	0.89107	1.15533	0.940989	0.29867	0.17949	0.338647
	111	0.104543	0.0536789	0.158565	0.00357223	0.0954102	-0.0664514	0.163191	0.00923055	0.0710037	0.288936	0.290505	0.0686372	0.126696	-0.00469358	0.0516764												0.178359	0.723608	0.121456	0.370237	0.258351	0.956326	0.539952	0.374372	0.867801	0.372908	0.176737	0.488026	0.030202	0.390425	0.900097	0.650578	0.652343	1.22051	0.947433	0.306431	0.181636	0.311577
	114	0.13061	0.0545487	0.148018	-0.00472137	0.105558	-0.0912248	0.156321	0.0328539	0.0688976	0.23903	0.229415	0.0976644	0.152355	-0.0186459	-0.00563605												0.185645	0.691798	0.270698	0.39438	0.245398	0.884895	0.513454	0.356406	0.91805	0.447523	0.238092	0.523099	0.00492318	0.420831	0.949251	0.609819	0.643392	1.18035	0.948663	0.323004	0.183925	0.308538
	117	0.143811	0.0698974	0.140173	0.0311881	0.0919591	-0.118114	0.144735	0.0205697	0.0660641	0.203739	0.301398	0.0788909	0.140345	-0.107717	-0.008583												0.154995	0.692351	0.319401	0.362313	0.235924	0.911319	0.545446	0.350781	0.945338	0.390855	0.223946	0.526538	0.015287	0.386316	0.941358	0.655496	0.644811	1.17778	0.943807	0.343347	0.164279	0.288424
	120	0.073596	0.0659441	0.115745	0.0385949	0.13903	-0.135522	0.13083	-0.0403716	0.0407436	0.218731	0.246419	0.06594	0.143655	-0.022376	-0.00247969												0.14781	0.708323	0.310794	0.344667	0.224344	0.899482	0.49847	0.34314	0.875128	0.330004	0.210504	0.472519	0.0124076	0.367767	0.943401	0.491767	0.62141	1.08495	0.93277	0.318675	0.161408	0.329338
	123	0.0812625	0.0498399	0.0543545	0.0198791	0.11561	-0.0825302	0.11383	-0.0187051	0.0375806	0.236433	0.296044	0.0887911	0.0910045	-0.00641327	0.0952034												0.119871	0.720949	0.321513	0.307805	0.226057	0.898465	0.435904	0.357102	0.826818	0.335914	0.19154	0.457594	0.0223314	0.35873	0.943931	0.486119	0.651882	1.06176	1.00451	0.356669	0.209432	0.334724
	126	0.115514	0.0544486	0.168466	0.0576542	0.119989	-0.102077	0.0831513	0.0142764	0.0365834	0.225127	0.234763	0.0762696	0.101938	0.0480507	0.0100887												0.106867	0.732304	0.282362	0.353793	0.227504	0.915112	0.482779	0.330433	0.807007	0.357112	0.189995	0.503885	0.0267547	0.404329	0.947717	0.452264	0.6374	0.928548	0.82711	0.310804	0.159057	0.255823
	129	0.0817955	0.0519953	0.161412	-0.000575901	0.11214	-0.0934538	0.0646096	-0.0109635	0.033578	0.230907	0.281038	0.127575	0.105916	0.0173555	-0.00526481												0.105081	0.762643	0.237888	0.308252	0.235377	0.88764	0.480599	0.293251	0.783626	0.37741	0.238577	0.509814	-0.000734208	0.358822	0.838129	0.432231	0.602591	0.951315	0.859589	0.322545	0.153336	0.305558
	132	0.083279	0.0762148	0.178165	-0.00914512	0.143172	-0.128108	0.0824311	-0.0334866	0.0541163	0.215111	0.284266	0.0804617	0.103354	0.0119375	-0.0306592												0.06979	0.756889	0.203782	0.309567	0.233837	0.87803	0.492451	0.294433	0.705368	0.42479	0.241049	0.497274	0.0041047	0.400131	0.851602	0.500963	0.626636	1.10832	0.869921	0.32782	0.201596	0.265505
	135	0.0501038	0.0370599	0.170668	0.0420994	0.128171	-0.106702	0.086569	-0.0654364	0.0418226	0.247287	0.25802	0.0111244	0.100092	-0.0302467	0.119798												0.12197	0.764394	0.185405	0.332622	0.214721	0.83046	0.434221	0.303732	0.683403	0.435629	0.214272	0.51696	0.0264274	0.390905	0.865158	0.450065	0.604932	1.01299	0.874598	0.324922	0.156203	0.256067
	138	0.0965751	0.0513445	0.119787	0.010252	0.125058	-0.0510038	0.0652426	-0.00422552	0.0486777	0.239147	0.245052	0.0473283	0.0778009	-0.132087	-0.0234894												0.085705	0.763187	0.189566	0.345419	0.204251	0.777696	0.415602	0.301309	0.654576	0.419124	0.225981	0.44408	-0.0298531	0.37125	0.913157	0.4399	0.610683	1.01377	0.864598	0.338129	0.175904	0.319108
	141	0.13101	0.0488488	0.170499	0.0168466	0.127549	-0.0354667	0.0563536	-0.0358657	0.0443821	0.247848	0.22148	0.150439	0.120887	-0.0973241	-0.102418												0.0953995	0.758971	0.175227	0.344112	0.238262	0.77523	0.387313	0.357016	0.636945	0.40606	0.198903	0.428505	-0.0573587	0.383816	0.893703	0.366833	0.599985	1.03239	0.83531	0.344465	0.150786	0.413398
	144	0.12197	0.0535114	0.112393	-0.0225957	0.128149	-0.0837424	0.0358993	-0.0796583	0.0532792	0.234194	0.246451	0.109034	0.106606	-0.103641	-0.085739												0.0570159	0.756681	0.180338	0.339607	0.213609	0.773138	0.42204	0.298635	0.591805	0.365601	0.232497	0.425778	0.0782116	0.365984	0.885497	0.417373	0.635574	1.05577	0.856858	0.310198	0.148137	0.41795
	147	0.161332	0.0376436	0.126633	0.00253003	0.0988344	-0.0998858	0.0492552	-0.0458729	0.0566603	0.230784	0.31223	0.123717	0.0791171	-0.0745948	-0.0907832												0.0732015	0.736147	0.142557	0.316096	0.208109	0.755795	0.426537	0.29044	0.521697	0.3696	0.236807	0.383401	9.0078e-05	0.35885	0.897931	0.439277	0.614467	1.04276	0.852568	0.284414	0.140286	0.31734
	150	0.134861	0.063071	0.112628	0.0454294	0.114252	-0.102133	0.0461203	-0.0727725	0.0472075	0.211381	0.308689	0.0777287	0.0863129	-0.0474612	-0.0995193												0.0251432	0.771251	0.116068	0.317343	0.20583	0.716975	0.383013	0.292697	0.520335	0.297116	0.250754	0.390023	-0.0280093	0.377428	0.827699	0.434005	0.561392	1.03077	0.859157	0.276164	0.137903	0.248818
	153	0.133825	0.0458043	0.143941	0.0267833	0.108904	-0.0847372	0.00888923	-0.0977396	0.0369784	0.157747	0.291736	0.0982468	0.123456	-0.105385	0.0923543												0.0576141	0.734452	0.127506	0.282214	0.218429	0.717064	0.364764	0.272639	0.46696	0.269767	0.274048	0.427342	0.0221551	0.338602	0.877941	0.387668	0.527361	1.02179	0.882663	0.288146	0.142691	0.326175
	156	0.10933	0.06731	0.0744965	-0.0316773	0.127078	-0.100551	0.0446226	-0.0645063	0.0368965	0.186813	0.26045	0.0584121	0.0664638	-0.0616385	-0.102442												0.0144948	0.608816	0.114102	0.260188	0.195328	0.734822	0.346846	0.251265	0.538446	0.245658	0.0978533	0.31731	-0.0504346	0.42023	0.854734	0.39836	0.532896	0.990547	0.856738	0.3039	0.180656	0.3079
	159	0.110741	0.0347294	0.215693	0.00610208	0.126312	-0.111078	0.0325299	-0.0434673	0.0259578	0.160035	0.22298	0.115194	0.0771527	-0.0260313	-0.0253008												0.0332401	0.672268	0.0656992	0.284114	0.213251	0.733627	0.306688	0.265705	0.469139	0.30052	0.0660415	0.342834	0.0232092	0.386088	0.845779	0.388574	0.517382	0.994766	0.86018	0.297005	0.155203	0.279162
	162	0.0762437	0.0479016	0.143111	-0.0156439	0.129113	-0.0491616	0.0371198	-0.103776	0.025679	0.138487	0.268822	0.092085	0.0951433	-0.0325323	0.0749497												-0.00616473	0.666239	0.0597653	0.263902	0.22358	0.746343	0.282523	0.232269	0.567364	0.247221	0.153241	0.378132	0.117619	0.376069	0.745183	0.381335	0.51298	0.968172	0.865326	0.289146	0.162185	0.292638
	165	0.115193	0.0303285	0.147731	0.0458365	0.126304	-0.0845082	0.0423912	-0.100582	0.0289185	0.140599	0.253911	0.0863573	0.10631	-0.0028548	0.00417788												0.0145609	0.675683	0.0182234	0.273031	0.235204	0.73424	0.3185	0.231519	0.516681	0.24152	0.186777	0.324893	0.0177708	0.373467	0.769934	0.426023	0.483092	1.00967	0.817143	0.28392	0.146743	0.247371
	168	0.0477183	0.0444367	0.101588	0.0192944	0.127772	-0.0961269	0.0391664	-0.0972042	0.021344	0.143783	0.257712	0.0778741	0.0957621	-0.120264	-0.00976961												0.0160602	0.642816	-0.00521438	0.28182	0.240318	0.703739	0.320703	0.21027	0.592836	0.270174	0.133775	0.367853	-0.0229625	0.426257	0.79511	0.413417	0.478816	1.00345	0.869033	0.333352	0.162722	0.297172
	171	0.0257697	0.0200856	0.161711	0.032085	0.128381	-0.102816	0.0490757	-0.11376	0.0158551	0.153144	0.263815	0.150659	0.085441	-0.156716	0.020351												-0.0102987	0.644364	-2.89116e-05	0.271331	0.237697	0.716695	0.318522	0.208202	0.574657	0.261955	0.0959516	0.301376	0.0549882	0.378638	0.783907	0.417378	0.539205	1.02903	0.824446	0.268319	0.153356	0.326349
	174	0.0415288	0.0538906	0.149617	0.0215414	0.173923	-0.122172	-0.0239973	-0.138323	0.0137382	0.125896	0.312507	0.112473	0.115961	-0.0654873	-0.0121755												-0.0122599	0.660766	0.0245086	0.269888	0.231892	0.706547	0.311965	0.208755	0.563005	0.278506	0.110451	0.33747	-0.00958093	0.311031	0.769483	0.4312	0.49203	0.972375	0.899951	0.288925	0.153511	0.301276
	177	-0.0235105	0.0493533	0.0446995	0.024638	0.142776	-0.125921	0.0114134	-0.115085	0.0136164	0.118665	0.269383	0.138579	0.0845297	-0.0969369	-0.0396823												-0.00396784	0.618624	-0.0621511	0.22598	0.255892	0.528608	0.289101	0.223782	0.51829	0.29254	0.181798	0.370136	-0.00143866	0.315683	0.760471	0.341755	0.411843	0.947299	0.880234	0.292436	0.117455	0.334817
	180	0.0108707	0.0865984	0.109946	0.0392648	0.170467	-0.132945	-0.0349149	-0.0869388	0.010151	0.119301	0.237582	0.135735	0.0945399	-0.114741	-0.0171213												-0.0106577	0.597674	-0.0982472	0.239905	0.227501	0.67828	0.279455	0.190989	0.513125	0.206167	0.205991	0.26132	-0.11096	0.381832	0.773119	0.321963	0.506793	0.807713	0.927463	0.296654	0.110098	0.293604
[truncated: 4 more columns]

## Sheet: Figure4L
Figure 4L
	Decay constant (s-1)
	DMSO	CK666
	0.0326759	0.0099779
	0.0110581	0.0198023
	0.0447444	0.00589051
	0.105749	0.00260466
	0.0550594	0.00533585
	0.0131316	0.014921
	0.0568385	0.0142722
	0.0309013	1.9053e-05
	0.0264564	0.00245935
	0.0650475	1.90903e-05
	0.171079	0.0222035
	0.0159288	0.00180377
	0.0576081	0.00917756
	0.0388916	0.00149984
	0.0589292	0.0391645
		0.0126365
		0.0144767
		0.00295093
		0.0246844
		0.0278532
		0.00268131
		0.0187566
		0.0166142
		0.0129212
		0.00134074
		0.0200471
