# Supplementary material for: A mechanosensing mechanism controls plasma membrane shape homeostasis at the nanoscale
Source: eLife. 2023 Sep 25;12:e72316. doi: 10.7554/eLife.72316 (PMC10569792; doi:10.7554/eLife.72316)
Supplement: Figure 5—figure supplement 1—source data 1. [file elife-72316-fig5-figsupp1-data1.xlsx]

## Sheet: FigureS5B
Figure S5B
	Relative mRNA levels
	Control	Nap1
	1	0.036
	1	0.075
	1	0.036
