# Supplementary material for: A mechanosensing mechanism controls plasma membrane shape homeostasis at the nanoscale
Source: eLife. 2023 Sep 25;12:e72316. doi: 10.7554/eLife.72316 (PMC10569792; doi:10.7554/eLife.72316)
Supplement: Figure 5—source data 1. [file elife-72316-fig5-data1.xlsx]

## Sheet: Figure5B
Figure 5B
	Ratio evagination versus flat PM				Relative enrichment
	PM	WAVE			1.13788
	1.59574	2.06097			0.931344
	1.59184	2.21292			0.813173
	1.38674	2.36918			1.31142
	1.52727	1.83962			1.45371
	1.53652	1.72521			1.54547
	1.4072	1.47105			1.05004
	1.62286	3.61886			1.33052
	1.7916	1.84707			1.14427
	1.52028	1.72373			0.690701
	1.91323	1.93146			1.16997
	1.33912	2.5749			1.13422
	1.73129	1.35242			1.08034
	1.98466	2.06569			1.68075
	1.79364	1.97584			1.03494
	1.55141	1.76691			1.21679
	1.58087	2.51374			1.31312
	2.74648	2.33005			0.812756
					1.82612
					1.0198
					1.49955
					0.99232
					1.16023
					1.04012
					1.13793
					0.755174
					0.79792
					1.23376
					1.19632
					1.06795
					1.08966
					1.17592
					1.1219
					1.29154
					1.39017
					1.70845
					1.20451
					1.12281
					1.04537
					2.22993
					1.03096
					1.13383
					1.00953
					1.92284
					0.781163
					1.04083
					1.10158
					1.13891
					1.5901
					0.848377

## Sheet: Figure5E
Figure 5E
	Density
	Control	Nap1
	0.0250139	0.0811786
	0.00213904	0.039548
	0.00848416	0.0298913
	0.0225807	0.00478011
	0.0185955	0.0245098
	0.0113501	0.0639535
	0.0426157	0.0463122
	0.0194589	0.0493392
	0.00098296	0.0190525
	0.0259909	0.0632184
	0.0113379	0.00372671
	0.01875	0.0326757
	0.00247158	0.00237982
	0.0035551	0.00568828
	0.00169635	0.0147291
	0.00798226	0.0168675
	0.00661978	0.00709677
	0.0555139	0.00459318
	0.00794647	0.00511291
	0.027933	0.00432325
	0.0216216	0.112688
	0.0365854	0.0774516
	0.0385757	0.0762144
	0.017039	0.0320256
	0.0427553	0.00422476
	0.0222985	0.0807407
	0.0120733	0.114965
	0.0221698	0.0553139
	0.00829876	0.0793489
	0.0649038	0.0805142
